# Supplementary material for: Memantine Administration Enhances Glutamatergic and GABAergic Pathways in the Human Hippocampus of Alzheimer's Disease Patients
Source: Proteomics. 2025 Jul 9;25(15):42–9. doi: 10.1002/pmic.70006 (PMC12329391; doi:10.1002/pmic.70006)
Supplement: Supplementary file 2 — Supporting information [file PMIC-25--s002.xlsx]

## Sheet: File list
File name	Injection	Fraction	Multiplex
RK114_IF232_2D_TMT_0p8ug_M1_A_01.raw	1	1	M1
RK114_IF232_2D_TMT_0p8ug_M1_A_02.raw	2	1	M1
RK114_IF232_2D_TMT_0p8ug_M1_B_01.raw	1	2	M1
RK114_IF232_2D_TMT_0p8ug_M1_B_02.raw	2	2	M1
RK114_IF232_2D_TMT_0p8ug_M1_C_01.raw	1	3	M1
RK114_IF232_2D_TMT_0p8ug_M1_C_02.raw	2	3	M1
RK114_IF232_2D_TMT_0p8ug_M1_CH_01.raw	1	9	M1
RK114_IF232_2D_TMT_0p8ug_M1_CH_02.raw	2	9	M1
RK114_IF232_2D_TMT_0p8ug_M1_D_01.raw	1	4	M1
RK114_IF232_2D_TMT_0p8ug_M1_D_02.raw	2	4	M1
RK114_IF232_2D_TMT_0p8ug_M1_E_01.raw	1	5	M1
RK114_IF232_2D_TMT_0p8ug_M1_E_02.raw	2	5	M1
RK114_IF232_2D_TMT_0p8ug_M1_F_01.raw	1	6	M1
RK114_IF232_2D_TMT_0p8ug_M1_F_02.raw	2	6	M1
RK114_IF232_2D_TMT_0p8ug_M1_G_01.raw	1	7	M1
RK114_IF232_2D_TMT_0p8ug_M1_G_02.raw	2	7	M1
RK114_IF232_2D_TMT_0p8ug_M1_H_01.raw	1	8	M1
RK114_IF232_2D_TMT_0p8ug_M1_H_02.raw	2	8	M1
RK114_IF232_2D_TMT_0p8ug_M1_I_01.raw	1	10	M1
RK114_IF232_2D_TMT_0p8ug_M1_I_02.raw	2	10	M1
RK114_IF232_2D_TMT_0p8ug_M1_J_01.raw	1	11	M1
RK114_IF232_2D_TMT_0p8ug_M1_J_02.raw	2	11	M1
RK114_IF232_2D_TMT_0p8ug_M1_K_01.raw	1	12	M1
RK114_IF232_2D_TMT_0p8ug_M1_K_02.raw	2	12	M1
RK114_IF232_2D_TMT_0p8ug_M1_L_01.raw	1	13	M1
RK114_IF232_2D_TMT_0p8ug_M1_L_02.raw	2	13	M1
RK114_IF232_2D_TMT_0p8ug_M1_M_01.raw	1	14	M1
RK114_IF232_2D_TMT_0p8ug_M1_M_02.raw	2	14	M1
RK114_IF232_2D_TMT_0p8ug_M1_N_01.raw	1	15	M1
RK114_IF232_2D_TMT_0p8ug_M1_N_02.raw	2	15	M1
RK114_IF232_2D_TMT_0p8ug_M1_O_01.raw	1	16	M1
RK114_IF232_2D_TMT_0p8ug_M1_O_02.raw	2	16	M1
RK114_IF232_2D_TMT_0p8ug_M1_P_01.raw	1	17	M1
RK114_IF232_2D_TMT_0p8ug_M1_P_02.raw	2	17	M1
RK114_IF232_2D_TMT_0p8ug_M1_Q_01.raw	1	18	M1
RK114_IF232_2D_TMT_0p8ug_M1_Q_02.raw	2	18	M1
RK114_IF232_2D_TMT_0p8ug_M1_R_01.raw	1	19	M1
RK114_IF232_2D_TMT_0p8ug_M1_R_02.raw	2	19	M1
RK114_IF232_2D_TMT_0p8ug_M1_S_01.raw	1	20	M1
RK114_IF232_2D_TMT_0p8ug_M1_S_02.raw	2	20	M1
RK114_IF232_2D_TMT_0p8ug_M1_T_01.raw	1	21	M1
RK114_IF232_2D_TMT_0p8ug_M1_T_02.raw	2	21	M1
RK114_IF232_2D_TMT_0p8ug_M1_U_01.raw	1	22	M1
RK114_IF232_2D_TMT_0p8ug_M1_U_02.raw	2	22	M1
RK114_IF232_2D_TMT_0p8ug_M1_V_01.raw	1	23	M1
RK114_IF232_2D_TMT_0p8ug_M1_V_02.raw	2	23	M1
RK114_IF232_2D_TMT_0p8ug_M1_W_01.raw	1	24	M1
RK114_IF232_2D_TMT_0p8ug_M1_W_02.raw	2	24	M1
RK114_IF232_2D_TMT_0p8ug_M2_A_01.raw	1	1	M2
RK114_IF232_2D_TMT_0p8ug_M2_A_02.raw	2	1	M2
RK114_IF232_2D_TMT_0p8ug_M2_B_01.raw	1	2	M2
RK114_IF232_2D_TMT_0p8ug_M2_B_02.raw	2	2	M2
RK114_IF232_2D_TMT_0p8ug_M2_C_01.raw	1	3	M2
RK114_IF232_2D_TMT_0p8ug_M2_C_02.raw	2	3	M2
RK114_IF232_2D_TMT_0p8ug_M2_CH_01.raw	1	9	M2
RK114_IF232_2D_TMT_0p8ug_M2_CH_02.raw	2	9	M2
RK114_IF232_2D_TMT_0p8ug_M2_D_01.raw	1	4	M2
RK114_IF232_2D_TMT_0p8ug_M2_D_02.raw	2	4	M2
RK114_IF232_2D_TMT_0p8ug_M2_E_01.raw	1	5	M2
RK114_IF232_2D_TMT_0p8ug_M2_E_02.raw	2	5	M2
RK114_IF232_2D_TMT_0p8ug_M2_F_01.raw	1	6	M2
RK114_IF232_2D_TMT_0p8ug_M2_F_02.raw	2	6	M2
RK114_IF232_2D_TMT_0p8ug_M2_G_01.raw	1	7	M2
RK114_IF232_2D_TMT_0p8ug_M2_G_02.raw	2	7	M2
RK114_IF232_2D_TMT_0p8ug_M2_H_01.raw	1	8	M2
RK114_IF232_2D_TMT_0p8ug_M2_H_02.raw	2	8	M2
RK114_IF232_2D_TMT_0p8ug_M2_I_01.raw	1	10	M2
RK114_IF232_2D_TMT_0p8ug_M2_I_02.raw	2	10	M2
RK114_IF232_2D_TMT_0p8ug_M2_J_01.raw	1	11	M2
RK114_IF232_2D_TMT_0p8ug_M2_J_02.raw	2	11	M2
RK114_IF232_2D_TMT_0p8ug_M2_K_01.raw	1	12	M2
RK114_IF232_2D_TMT_0p8ug_M2_K_02.raw	2	12	M2
RK114_IF232_2D_TMT_0p8ug_M2_L_01.raw	1	13	M2
RK114_IF232_2D_TMT_0p8ug_M2_L_02.raw	2	13	M2
RK114_IF232_2D_TMT_0p8ug_M2_M_01.raw	1	14	M2
RK114_IF232_2D_TMT_0p8ug_M2_M_02.raw	2	14	M2
RK114_IF232_2D_TMT_0p8ug_M2_N_01.raw	1	15	M2
RK114_IF232_2D_TMT_0p8ug_M2_N_02.raw	2	15	M2
RK114_IF232_2D_TMT_0p8ug_M2_O_01.raw	1	16	M2
RK114_IF232_2D_TMT_0p8ug_M2_O_02.raw	2	16	M2
RK114_IF232_2D_TMT_0p8ug_M2_P_01.raw	1	17	M2
RK114_IF232_2D_TMT_0p8ug_M2_P_02.raw	2	17	M2
RK114_IF232_2D_TMT_0p8ug_M2_Q_01.raw	1	18	M2
RK114_IF232_2D_TMT_0p8ug_M2_Q_02.raw	2	18	M2
RK114_IF232_2D_TMT_0p8ug_M2_R_01.raw	1	19	M2
RK114_IF232_2D_TMT_0p8ug_M2_R_02.raw	2	19	M2
RK114_IF232_2D_TMT_0p8ug_M2_S_01.raw	1	20	M2
RK114_IF232_2D_TMT_0p8ug_M2_S_02.raw	2	20	M2
RK114_IF232_2D_TMT_0p8ug_M2_T_01.raw	1	21	M2
RK114_IF232_2D_TMT_0p8ug_M2_T_02.raw	2	21	M2
RK114_IF232_2D_TMT_0p8ug_M2_U_01.raw	1	22	M2
RK114_IF232_2D_TMT_0p8ug_M2_U_02.raw	2	22	M2
RK114_IF232_2D_TMT_0p8ug_M2_V_01.raw	1	23	M2
RK114_IF232_2D_TMT_0p8ug_M2_V_02.raw	2	23	M2
RK114_IF232_2D_TMT_0p8ug_M2_W_01.raw	1	24	M2
RK114_IF232_2D_TMT_0p8ug_M2_W_02.raw	2	24	M2
RK114_IF232_2D_TMT_0p8ug_M3_A_01.raw	1	1	M3
RK114_IF232_2D_TMT_0p8ug_M3_A_02.raw	2	1	M3
RK114_IF232_2D_TMT_0p8ug_M3_B_01.raw	1	2	M3
RK114_IF232_2D_TMT_0p8ug_M3_B_02.raw	2	2	M3
RK114_IF232_2D_TMT_0p8ug_M3_C_01.raw	1	3	M3
RK114_IF232_2D_TMT_0p8ug_M3_C_02.raw	2	3	M3
RK114_IF232_2D_TMT_0p8ug_M3_CH_01.raw	1	9	M3
RK114_IF232_2D_TMT_0p8ug_M3_CH_02.raw	2	9	M3
RK114_IF232_2D_TMT_0p8ug_M3_D_01.raw	1	4	M3
RK114_IF232_2D_TMT_0p8ug_M3_D_02.raw	2	4	M3
RK114_IF232_2D_TMT_0p8ug_M3_E_01.raw	1	5	M3
RK114_IF232_2D_TMT_0p8ug_M3_E_02.raw	2	5	M3
RK114_IF232_2D_TMT_0p8ug_M3_F_01.raw	1	6	M3
RK114_IF232_2D_TMT_0p8ug_M3_F_02.raw	2	6	M3
RK114_IF232_2D_TMT_0p8ug_M3_G_01.raw	1	7	M3
RK114_IF232_2D_TMT_0p8ug_M3_G_02.raw	2	7	M3
RK114_IF232_2D_TMT_0p8ug_M3_H_01.raw	1	8	M3
RK114_IF232_2D_TMT_0p8ug_M3_H_02.raw	2	8	M3
RK114_IF232_2D_TMT_0p8ug_M3_I_01.raw	1	10	M3
RK114_IF232_2D_TMT_0p8ug_M3_I_02.raw	2	10	M3
RK114_IF232_2D_TMT_0p8ug_M3_J_01.raw	1	11	M3
RK114_IF232_2D_TMT_0p8ug_M3_J_02.raw	2	11	M3
RK114_IF232_2D_TMT_0p8ug_M3_K_01.raw	1	12	M3
RK114_IF232_2D_TMT_0p8ug_M3_K_02.raw	2	12	M3
RK114_IF232_2D_TMT_0p8ug_M3_L_01.raw	1	13	M3
RK114_IF232_2D_TMT_0p8ug_M3_L_02.raw	2	13	M3
RK114_IF232_2D_TMT_0p8ug_M3_M_01.raw	1	14	M3
RK114_IF232_2D_TMT_0p8ug_M3_M_02.raw	2	14	M3
RK114_IF232_2D_TMT_0p8ug_M3_N_01.raw	1	15	M3
RK114_IF232_2D_TMT_0p8ug_M3_N_02.raw	2	15	M3
RK114_IF232_2D_TMT_0p8ug_M3_O_01.raw	1	16	M3
RK114_IF232_2D_TMT_0p8ug_M3_O_02.raw	2	16	M3
RK114_IF232_2D_TMT_0p8ug_M3_P_01.raw	1	17	M3
RK114_IF232_2D_TMT_0p8ug_M3_P_02.raw	2	17	M3
RK114_IF232_2D_TMT_0p8ug_M3_Q_01.raw	1	18	M3
RK114_IF232_2D_TMT_0p8ug_M3_Q_02.raw	2	18	M3
RK114_IF232_2D_TMT_0p8ug_M3_R_01.raw	1	19	M3
RK114_IF232_2D_TMT_0p8ug_M3_R_02.raw	2	19	M3
RK114_IF232_2D_TMT_0p8ug_M3_S_01.raw	1	20	M3
RK114_IF232_2D_TMT_0p8ug_M3_S_02.raw	2	20	M3
RK114_IF232_2D_TMT_0p8ug_M3_T_01.raw	1	21	M3
RK114_IF232_2D_TMT_0p8ug_M3_T_02.raw	2	21	M3
RK114_IF232_2D_TMT_0p8ug_M3_U_01.raw	1	22	M3
RK114_IF232_2D_TMT_0p8ug_M3_U_02.raw	2	22	M3
RK114_IF232_2D_TMT_0p8ug_M3_V_01.raw	1	23	M3
RK114_IF232_2D_TMT_0p8ug_M3_V_02.raw	2	23	M3
RK114_IF232_2D_TMT_0p8ug_M3_W_01.raw	1	24	M3
RK114_IF232_2D_TMT_0p8ug_M3_W_02.raw	2	24	M3
RK114_IF232_2D_TMT_0p8ug_M4_A_01.raw	1	1	M4
RK114_IF232_2D_TMT_0p8ug_M4_A_02.raw	2	1	M4
RK114_IF232_2D_TMT_0p8ug_M4_B_01.raw	1	2	M4
RK114_IF232_2D_TMT_0p8ug_M4_B_02.raw	2	2	M4
RK114_IF232_2D_TMT_0p8ug_M4_C_01.raw	1	3	M4
RK114_IF232_2D_TMT_0p8ug_M4_C_02.raw	2	3	M4
RK114_IF232_2D_TMT_0p8ug_M4_CH_01.raw	1	9	M4
RK114_IF232_2D_TMT_0p8ug_M4_CH_02.raw	2	9	M4
RK114_IF232_2D_TMT_0p8ug_M4_D_01.raw	1	4	M4
RK114_IF232_2D_TMT_0p8ug_M4_D_02.raw	2	4	M4
RK114_IF232_2D_TMT_0p8ug_M4_E_01.raw	1	5	M4
RK114_IF232_2D_TMT_0p8ug_M4_E_02.raw	2	5	M4
RK114_IF232_2D_TMT_0p8ug_M4_F_01.raw	1	6	M4
RK114_IF232_2D_TMT_0p8ug_M4_F_02.raw	2	6	M4
RK114_IF232_2D_TMT_0p8ug_M4_G_01.raw	1	7	M4
RK114_IF232_2D_TMT_0p8ug_M4_G_02.raw	2	7	M4
RK114_IF232_2D_TMT_0p8ug_M4_H_01.raw	1	8	M4
RK114_IF232_2D_TMT_0p8ug_M4_H_02.raw	2	8	M4
RK114_IF232_2D_TMT_0p8ug_M4_I_01.raw	1	10	M4
RK114_IF232_2D_TMT_0p8ug_M4_I_02.raw	2	10	M4
RK114_IF232_2D_TMT_0p8ug_M4_J_01.raw	1	11	M4
RK114_IF232_2D_TMT_0p8ug_M4_J_02.raw	2	11	M4
RK114_IF232_2D_TMT_0p8ug_M4_K_01.raw	1	12	M4
RK114_IF232_2D_TMT_0p8ug_M4_K_02.raw	2	12	M4
RK114_IF232_2D_TMT_0p8ug_M4_L_01.raw	1	13	M4
RK114_IF232_2D_TMT_0p8ug_M4_L_02.raw	2	13	M4
RK114_IF232_2D_TMT_0p8ug_M4_M_01.raw	1	14	M4
RK114_IF232_2D_TMT_0p8ug_M4_M_02.raw	2	14	M4
RK114_IF232_2D_TMT_0p8ug_M4_N_01.raw	1	15	M4
RK114_IF232_2D_TMT_0p8ug_M4_N_02.raw	2	15	M4
RK114_IF232_2D_TMT_0p8ug_M4_O_01.raw	1	16	M4
RK114_IF232_2D_TMT_0p8ug_M4_O_02.raw	2	16	M4
RK114_IF232_2D_TMT_0p8ug_M4_P_01.raw	1	17	M4
RK114_IF232_2D_TMT_0p8ug_M4_P_02.raw	2	17	M4
RK114_IF232_2D_TMT_0p8ug_M4_Q_01.raw	1	18	M4
RK114_IF232_2D_TMT_0p8ug_M4_Q_02.raw	2	18	M4
RK114_IF232_2D_TMT_0p8ug_M4_R_01.raw	1	19	M4
RK114_IF232_2D_TMT_0p8ug_M4_R_02.raw	2	19	M4
RK114_IF232_2D_TMT_0p8ug_M4_S_01.raw	1	20	M4
RK114_IF232_2D_TMT_0p8ug_M4_S_02.raw	2	20	M4
RK114_IF232_2D_TMT_0p8ug_M4_T_01.raw	1	21	M4
RK114_IF232_2D_TMT_0p8ug_M4_T_02.raw	2	21	M4
RK114_IF232_2D_TMT_0p8ug_M4_U_01.raw	1	22	M4
RK114_IF232_2D_TMT_0p8ug_M4_U_02.raw	2	22	M4
RK114_IF232_2D_TMT_0p8ug_M4_V_01.raw	1	23	M4
RK114_IF232_2D_TMT_0p8ug_M4_V_02.raw	2	23	M4
RK114_IF232_2D_TMT_0p8ug_M4_W_01.raw	1	24	M4
RK114_IF232_2D_TMT_0p8ug_M4_W_02.raw	2	24	M4

## Sheet: TMT labeling scheme
Multiplex M1	Sample
126	AD+M 7
127N	Ctrl 1
127C	AD+M 8
128N	Ctrl 12
128C	AD 6
129N	Ctrl 4
129C	AD 10
130N	Ctrl 5
130C	AD 1
131	Pool (used for normalization)
Multiplex M2	Sample
126	AD 5
127N	Ctrl 13
127C	AD 9
128N	Ctrl 2
128C	AD 4
129N	Ctrl 6
129C	AD+M 1
130N	Pool
130C	AD+M 5
131	Pool (used for normalization)
Multiplex M3	Sample
126	AD+M 6
127N	Ctrl 9
127C	AD+M 3
128N	Ctrl 10
128C	AD 7
129N	Ctrl 11
129C	AD 3
130N	Ctrl 3
130C	AD 8
131	Pool (used for normalization)
Multiplex M4	Sample
126	AD+M 4
127N	Ctrl 7
127C	AD+M 2
128N	Ctrl 14
128C	AD 2
129N	Ctrl 15
129C	AD 11
130N	Pool
130C	Ctrl 8
131	Pool (used for normalization)

## Sheet: Protein ratios
Index	Gene	NumberPSM	MaxPepProb	Ctrl 1	Ctrl 2	Ctrl 3	Ctrl 4	Ctrl 5	Ctrl 6	Ctrl 7	Ctrl 8	Ctrl 9	Ctrl 10	Ctrl 11	Ctrl 12	Ctrl 13	Ctrl 14	Ctrl 15	AD 1	AD 2	AD 3	AD 4	AD 5	AD 6	AD 7	AD 8	AD 9	AD 10	AD 11	AD+M 1	AD+M 2	AD+M 3	AD+M 4	AD+M 5	AD+M 6	AD+M 7	AD+M 8
A0A024QZX5	SERPINB6	319	1	1.07893	0.976145	1.03077	1.13673	1.13531	1.10783	1.04604	1.02181	0.948929	0.947666	0.912233	0.948232	0.972794	0.862174	0.925545	1.12565	1.05548	0.950653	0.979764	0.899683	0.973296	0.993714	0.929071	0.972876	1.25492	1.1084	1.00045	1.06862	0.872711	0.943959	0.781494	0.73819	0.788214	0.842236
A0A024R1R8	TMA7B	11	1	0.648718	0.690731	0.783119	0.825165	0.78258	1.02965	1.16188	1.07458	1.04779	1.18005	1.17057	1.00385	1.03176	0.873329	0.822169	0.804657	1.13086	1.36195	1.09899	1.9036	1.58872	1.5062	1.52816	1.63317	1.15854	1.24204	1.02108	1.55891	1.82793	0.977498	0.765822	1.36373	1.43837	1.43202
A0A024R6N5	SERPINA1	17	1	0.805936	0.190039	0.688988	0.248267	3.97027	0.171094	6.79629	0.461757	0.287756	0.28319	3.22298	0.216601	0.162065	1.51417	1.80084	0.142977	0.708759	0.509808	0.373173	3.06867	1.24512	0.29374	1.35355	2.44019	0.239581	0.955953	0.248837	0.764203	0.353858	0.405471	0.298663	0.764485	0.387783	1.2668
A0A024RBG1	NUDT4B	12	1	0.845989	1.01703	0.470261	0.891692	0.960644	0.747218	0.721344	0.709838	0.865851	0.654302	0.993016	0.870658	0.82919	0.82661	1.15898	0.91326	1.20987	0.864165	1.52634	0.850721	1.22738	0.784717	0.94177	0.937023	1.00696	0.957465	0.954356	0.777625	1.15733	0.89953	1.09442	1.04141	0.875981	1.04398
A0A024RCM4	BAG6	291	1	0.957429	1.06356	1.00783	0.940667	1.08761	0.94046	0.999471	0.923905	1.00573	0.972725	1.01967	1.17446	1.0391	0.970909	1.10351	0.94759	1.04009	1.02777	1.03372	0.990587	0.955336	1.07678	1.03706	0.971469	0.965728	1.01476	1.00784	0.941277	1.0031	0.970637	0.946131	0.984998	0.883585	0.800578
A0A075B6H9	IGLV4-69	7	1	0.432184	3.95509	0.808737	1.00245	0.674018	1.7614	0.791387	0.636828	1.15685	0.573501	0.571435	0.680708	0.938006	0.94884	0.820974	0.382531	1.06883	0.774962	0.996182	1.44929	0.517679	1.90738	0.994408	1.46587	0.842093	1.46396	0.707862	2.0163	1.53133	1.17594	1.26259	0.935044	1.99277	1.58359
A0A075B6I0	IGLV8-61	9	1	0.904274	3.02234	1.08731	0.450338	2.12461	1.21687	0.534431	0.576641	1.08642	0.694196	0.729349	0.945101	0.482791	0.878404	1.4604	0.431516	1.24729	0.556735	1.34795	1.41395	0.875483	1.16931	0.82332	0.849823	0.875836	1.00323	0.718407	0.822442	1.47948	0.911744	0.994801	0.818282	0.876449	1.33621
A0A075B6I1	IGLV4-60	4	1	NA	1.14676	1.33979	NA	NA	2.05138	0.931807	0.607339	1.09745	0.827887	1.05838	NA	1.30326	1.1763	0.745809	NA	0.675899	0.878974	1.53182	1.01095	NA	1.32474	1.08848	1.85247	NA	1.10838	0.879106	1.26246	1.15642	1.35785	0.827791	0.668097	NA	NA
A0A075B6K4	IGLV3-10	12	0.9974	0.567944	0.934015	0.793658	1.14422	1.05078	1.34302	0.993308	1.35559	0.890864	0.388748	0.66323	0.801971	1.04479	0.837342	1.09781	0.763887	1.02888	0.942186	1.7957	1.56699	0.740458	1.2079	0.796396	1.4394	2.51261	0.996981	0.82825	1.2341	1.30689	1.16442	0.926814	0.870633	1.68542	0.989769
A0A075B6P5	IGKV2-28	18	1	0.741466	1.20411	1.06323	0.993045	1.10528	1.03478	0.509815	0.520656	0.588707	0.419155	0.746965	0.840667	0.912349	0.522097	0.964366	0.671552	0.839609	0.872066	1.17456	1.15851	0.676256	0.98743	1.00616	0.952615	0.903386	6.70394	0.510268	1.72471	0.930136	0.761715	0.724906	0.834176	1.55666	1.4762
A0A075B6R9	IGKV2D-24	16	1	0.679317	1.55325	1.10344	0.945693	1.32255	1.13419	0.709056	0.706176	0.742855	0.758818	1.03611	0.754921	1.07512	0.800976	2.26193	0.652218	0.841477	0.690002	0.833013	1.23793	0.97919	1.33195	0.950846	0.992724	0.944936	0.963746	0.613272	1.58094	1.12382	1.36851	0.84349	1.03906	2.14195	1.3549
A0A075B6S9	IGKV1-37	3	0.9939	NA	NA	1.13774	NA	NA	NA	1.27335	1.07603	1.00693	1.14903	1.33366	NA	NA	1.44837	1.31755	NA	1.01892	1.36011	NA	NA	NA	1.8856	1.48906	NA	NA	1.04926	NA	1.6266	1.89945	0.866142	NA	1.19249	NA	NA
A0A075B730	EPPK1	64	1	0.919164	0.918834	1.3612	0.867132	0.82634	0.8062	0.640712	0.963446	0.766891	0.841033	1.05826	0.838688	0.92556	0.928663	0.961202	0.914417	0.982069	1.03283	1.06831	0.991963	1.2367	1.05948	1.10894	0.981357	1.15893	1.19534	0.983591	0.941604	1.24245	0.860684	1.15996	1.15336	1.30984	1.20344
A0A075B767	PPIAL4H	10	0.999	1.54594	1.6414	1.17804	1.02262	1.00033	1.09628	0.705319	0.883899	0.916972	0.864103	0.895061	0.924559	1.58904	0.954344	0.718986	1.19136	0.936987	0.667457	0.762029	0.869315	0.787401	0.764089	0.612678	1.19203	0.704873	0.657071	0.965704	0.46618	0.587561	0.70859	1.30661	0.582237	0.797742	0.552342
A0A075B7B1	SYNM	24	1	1.20416	0.769145	0.879463	1.23633	0.812353	0.791767	0.770041	1.14197	0.954326	0.955771	0.912734	0.940106	0.592486	0.703265	0.936608	0.881395	1.37664	0.832209	0.803863	0.779391	1.07188	0.798524	0.796932	0.878808	2.49629	1.15976	1.14746	0.950799	1.00553	0.955392	1.13754	1.02341	1.08718	1.15416
A0A075B7B8	IGHV3OR16-12	9	0.9999	0.871244	1.14899	NA	1.19026	1.01196	1.24176	0.946475	0.963469	NA	NA	NA	0.801286	0.936325	0.985725	1.51789	0.871499	0.732764	NA	1.09742	1.04491	0.836804	NA	NA	1.13746	0.842728	0.799621	0.961166	0.87635	NA	1.29658	1.34613	NA	1.17883	1.28725
A0A075B7D0	IGHV1OR15-1	16	1	1.14172	1.43299	1.55255	1.7909	1.6399	1.33265	0.740773	0.571293	0.742134	0.481764	0.781004	1.08479	1.49092	0.718383	1.04989	0.74286	0.516288	0.965985	0.940121	1.06761	0.559289	1.03883	0.661928	1.2488	0.771133	0.807227	0.812412	1.27869	0.957156	1.03865	0.836129	0.877106	1.46443	1.04197
A0A075B7D6	TAF15	5	0.9966	0.622905	1.25223	0.859279	1.12862	0.856052	1.37642	1.24751	1.17592	1.23022	1.125	0.9045	1.07193	1.14259	0.778344	0.812439	1.1635	0.941909	1.35861	1.57632	1.62445	1.20359	1.3684	1.41469	1.24906	1.42544	1.23466	1.24856	1.16412	1.7769	1.47358	1.3351	1.62394	1.57175	1.23022
A0A087WSY6	IGKV3D-15	4	1	0.74439	0.97874	0.99166	1.18892	1.0222	1.08554	0.774736	0.805748	0.954362	0.900314	0.949196	0.905975	1.40557	0.668757	0.874419	0.83547	1.17696	1.03926	1.49189	1.30175	1.09586	1.20907	1.72405	0.913241	1.15659	1.36773	0.955974	1.55107	1.78619	1.10553	0.928678	0.999431	2.59858	1.62212
A0A087WT59	TTR	139	1	0.644345	0.824414	0.804095	0.810645	1.27447	1.88798	0.844908	1.35443	1.18998	0.949079	0.916725	0.889937	0.734975	0.858544	0.855233	1.29393	0.857006	0.880545	1.07454	1.71007	1.2287	1.45297	1.21429	0.875069	1.65644	1.22742	0.740009	2.09581	1.17977	0.831245	0.788177	0.852491	0.690481	0.786287
A0A087WTE6	SRCIN1	11	1	1.11895	0.991033	0.888838	0.976292	1.22032	0.851181	1.12933	1.17092	0.786404	1.00201	1.15399	0.897568	1.03806	1.42898	1.21288	1.26812	1.12526	0.990604	1.14224	0.845231	1.33375	1.0253	0.965604	0.900826	1.0334	1.28708	1.10304	1.18193	1.20844	1.32261	1.13332	0.793157	1.61714	1.3565
A0A087WTF0	PTPDC1	12	1	0.97718	0.96119	0.949373	0.976387	0.919669	0.833703	0.725742	0.948574	1.20496	1.01961	1.02409	1.05909	1.17603	0.69636	0.994844	1.18452	0.879821	1.37793	1.25326	1.89532	1.06502	0.815701	1.11212	0.983886	1.03565	0.807006	0.910501	0.457492	1.03885	0.734455	1.53596	1.16709	1.48558	1.25135
A0A087WTF3	ANK3	16	1	1.25278	0.953076	0.991812	0.957596	1.06655	1.22711	1.14331	1.11398	1.03977	0.87535	1.05791	1.07552	1.05492	0.935737	1.09291	0.971234	0.963938	0.973842	0.991335	1.01156	0.888284	0.940147	1.02445	0.965517	0.970122	0.81674	1.01948	0.823268	0.876554	1.08507	1.07464	0.757751	1.07805	0.992376
A0A087WU03	HNRNPDL	16	1	1.18378	1.68969	1.0956	0.726875	1.07092	0.826702	0.892461	1.08442	0.768434	0.947869	0.965184	1.05483	1.10522	1.32785	1.33387	1.3567	1.12478	0.965722	0.521263	0.495242	0.466943	0.42041	0.380186	0.719101	0.653171	0.892461	0.987153	0.61845	0.374471	0.586994	1.05778	0.393609	0.616252	0.341936
A0A087WU28	MRPL51	6	1	0.697934	0.563493	0.820424	0.787179	0.802346	0.470782	1.18639	1.16556	1.06326	1.03273	1.07403	0.804003	0.631547	1.13634	1.0462	0.765313	1.63475	1.21034	1.49771	0.80372	1.02918	1.22846	1.45699	1.39518	0.917094	1.08161	1.22918	1.58353	1.03128	0.799192	0.925969	NA	1.14973	0.81877
A0A087WU33	SRCIN1	1	0.9923	NA	NA	0.854076	NA	NA	NA	NA	NA	1.05063	0.982633	1.03078	NA	NA	NA	NA	NA	NA	1.09687	NA	NA	NA	0.600119	0.660088	NA	NA	NA	NA	NA	0.590829	NA	NA	0.598361	NA	NA
A0A087WUA6	YJEFN3	3	1	NA	NA	1.0561	NA	NA	NA	1.25409	0.990475	1.02684	1.10243	1.36189	NA	NA	1.06833	1.20714	NA	1.03863	1.03219	NA	NA	NA	1.04918	1.05049	NA	NA	1.19067	NA	1.11273	1.17076	1.18567	NA	1.22986	NA	NA
A0A087WUI7	DSCAM	12	0.997	0.756058	0.722215	0.848706	1.10209	0.971983	1.15529	1.20222	1.30103	0.923832	1.04564	1.05431	0.975378	1.17401	0.940398	0.826061	0.727581	1.03361	1.06722	1.48564	1.3917	1.57316	1.58136	1.49133	1.40348	1.3661	1.12098	1.40725	1.52831	0.778831	0.989665	0.625353	0.863148	1.06912	0.659609
A0A087WUL2	PSMB3	12	1	0.853257	1.15887	1.0807	1.16081	1.22599	0.997405	1.37958	1.21865	1.22259	0.905641	0.952372	1.28805	1.30706	0.853996	0.939018	1.23906	1.2741	0.980187	0.822858	1.21478	0.912141	1.11861	0.894278	1.53963	1.04987	1.06862	1.0209	1.00429	0.460018	0.714382	0.590816	0.296908	0.260621	0.267208
A0A087WUZ3	SPTBN1	2	1	NA	NA	1.04917	NA	NA	NA	1.20515	1.03834	0.799183	1.08829	1.21048	NA	NA	1.04408	1.02428	NA	1.1881	1.32853	NA	NA	NA	1.32238	1.41921	NA	NA	1.3218	NA	1.38891	1.25484	1.37751	NA	0.966523	NA	NA
A0A087WV00	DGKI	44	1	1.15305	0.954789	1.04751	1.01501	1.08709	1.08312	0.911916	1.01463	0.921532	1.01546	1.01989	0.949609	0.980455	1.13334	1.03994	0.964906	1.04494	1.12319	1.03606	1.0615	1.02771	1.12832	1.12907	1.06058	0.925004	0.891154	1.06991	1.08567	1.11632	0.982928	1.1169	1.2612	0.847168	1.16307
A0A087WV17	OSCAR	1	0.9998	NA	NA	0.479032	NA	NA	NA	NA	NA	NA	0.657881	1.26223	NA	NA	NA	NA	NA	NA	1.02814	NA	NA	NA	0.952303	1.27497	NA	NA	NA	NA	NA	1.29202	NA	NA	1.55511	NA	NA
A0A087WV53	SPEGNB	2	0.9956	0.584529	NA	NA	1.27274	0.951526	NA	1.43102	1.94847	NA	NA	NA	0.702775	NA	0.739232	0.665493	1.11484	0.926421	NA	NA	NA	0.793516	NA	NA	NA	2.60311	1.01122	NA	1.39659	NA	1.65728	NA	NA	0.860222	0.614309
A0A087WVV1	PSMB2	7	0.9998	0.600794	0.828426	0.908822	0.892514	1.06075	0.832638	1.34512	1.10187	0.858292	0.965403	1.11315	0.917379	1.13227	0.897075	1.00289	0.810008	1.2741	1.26465	1.01637	1.52831	1.28448	1.88703	1.45845	1.54959	1.21273	1.10095	1.03616	1.9039	1.47215	0.900276	0.757786	0.885264	0.811232	0.812443
A0A087WVX5	CACNB2	38	1	0.975146	1.07715	0.947415	1.02112	0.990258	1.16055	0.863886	1.03027	0.954281	0.948394	0.986301	1.03933	1.08218	0.997529	1.20116	0.94504	1.01709	1.05133	1.08474	1.07218	1.30197	0.983388	1.02873	0.838143	0.900251	0.810472	0.954408	0.732261	1.2175	0.978746	1.23437	1.18441	1.10717	1.1136
A0A087WW63	CACNA1A	52	1	0.784445	0.810967	0.919965	0.993601	0.923874	1.02499	1.01732	1.05825	1.09551	1.07966	1.00282	1.10578	0.887965	0.978948	1.02003	0.97087	1.07753	1.19856	1.00231	1.07896	1.12567	1.17582	1.32829	0.95343	0.96146	1.1283	0.918266	1.08924	1.27551	1.34946	1.13508	1.25077	1.24444	1.14624
A0A087WW65	ABCB7	50	1	0.787419	0.851167	0.97342	1.06022	1.00008	1.074	0.992894	1.00747	0.866605	1.00433	0.944936	0.847663	0.797348	1.03068	0.963599	1.13919	0.909517	1.17539	1.13406	1.20808	1.32856	1.05865	1.10089	1.05986	1.21632	1.02568	1.10032	1.20107	1.56425	1.44734	1.55659	1.94676	1.83834	1.81505
A0A087WWM6	PRODH	190	1	1.17406	1.0059	0.87175	1.14121	0.944029	0.943501	1.00331	0.919996	0.630315	0.745738	0.951682	0.95308	0.948585	0.905559	0.911701	1.38636	1.08698	0.957923	0.974389	0.930712	1.02976	1.02314	1.19343	1.05022	1.30534	1.37657	1.01356	1.04704	0.888067	0.936065	0.998313	0.930811	0.914957	0.911087
A0A087WWU8	TPM3	180	1	2.06014	1.33296	1.43806	1.11871	1.10203	0.980163	0.964129	1.2265	0.800909	0.825038	0.820015	0.940034	0.99048	0.832908	0.897678	1.19862	0.968211	0.714367	0.547953	0.628037	0.62317	0.703701	0.526103	0.796194	0.980228	0.963605	0.803003	0.725266	0.690922	1.03245	0.957058	0.772484	0.789668	0.727024
A0A087WWY4	PALM	18	1	0.924384	1.25728	1.35531	0.747318	1.02923	0.97054	1.13005	1.16213	1.00824	1.07867	1.1572	1.13911	1.26056	1.12786	1.13526	1.08731	0.988191	0.542445	0.574202	0.595284	0.916231	0.933371	0.733212	0.969453	0.896407	0.830509	0.79068	1.0198	0.663683	0.828284	0.689434	0.508231	0.689186	0.74607
A0A087WX23	PEG10	11	1	0.738953	1.01655	0.857938	0.880629	0.863225	1.08347	1.04313	1.14586	0.989143	0.897447	0.869514	0.975861	0.752634	0.914487	0.801709	0.703324	1.0765	1.29607	1.72955	1.32089	1.22461	1.19996	1.29594	1.03567	0.823305	0.922403	1.00488	1.10898	1.2603	1.31098	1.26389	1.29508	1.3888	1.02165
A0A087WX80	LAMA2	219	1	0.893929	0.886939	0.935154	0.945569	0.948487	1.16839	1.0153	1.02064	1.03021	1.08233	0.982428	0.932865	0.980342	0.925435	0.985531	0.89283	1.07309	1.14509	1.16802	1.18703	1.11708	1.14014	1.15939	1.02812	1.23468	1.02061	1.13232	1.12337	1.13342	1.13908	1.17396	1.24202	1.30677	1.24863
A0A087WXP2	NFIX	36	1	0.946122	0.966298	0.863548	0.994673	1.13495	1.2591	0.975088	0.907536	1.18877	0.946382	1.04495	1.06633	0.917713	0.950322	1.0893	0.876225	1.07771	0.978754	0.818553	0.855762	0.769825	0.83447	1.0802	0.835063	0.871331	0.894926	1.15416	0.865486	0.895895	0.998808	1.05837	0.984627	0.859924	0.875433
A0A087WXX8	SDHB	14	1	1.15926	0.977148	1.47099	1.07767	1.08088	0.95924	0.923571	1.24679	0.877072	0.796671	0.766308	0.86024	0.961527	0.850077	0.754111	0.854525	1.00549	0.890708	0.495629	0.570004	0.867301	0.67951	0.616146	0.804098	0.768732	0.959642	0.68719	0.829514	0.519125	0.894815	0.654365	0.536286	1.0842	1.29045
A0A087WY03	SREK1	9	1	0.616787	1.01786	0.880769	0.942184	0.92475	1.11758	1.16681	0.9975	1.28105	1.02607	1.00955	0.936177	0.958909	1.24984	1.15527	0.90967	1.33697	1.02456	1.13127	1.23584	1.15163	1.21133	0.972806	1.31903	1.15953	1.35559	1.06769	1.44287	1.41795	1.41733	1.54853	1.20226	1.28039	1.31929
A0A087WYI9	CDK11B	13	0.9981	0.952468	0.906835	0.850928	0.964038	0.896896	1.0905	0.824717	0.811576	0.906305	0.810317	1.18674	1.02879	0.83729	0.928126	1.04825	0.985496	1.10637	1.34567	1.42743	1.33656	1.32929	1.07961	1.13819	0.928149	0.993141	1.29404	1.14209	1.18779	0.865593	1.08044	1.1191	1.16505	1.20544	1.20158
A0A087WYL5	SEZ6L2	96	1	1.01464	1.0581	1.09264	0.965245	1.0689	1.02854	1.06702	0.879827	1.11929	1.0813	1.06331	1.08389	1.0755	1.08166	1.03953	0.920157	0.943565	0.936118	1.03122	0.963444	0.932883	0.860549	0.929778	0.975178	0.881902	0.882856	1.0202	1.00069	0.967448	0.910213	0.982478	0.899608	0.949293	0.807355
A0A087WYV9	SYNJ2BP-COX16	12	0.9999	0.964564	0.97796	1.0484	0.750777	0.995548	0.926989	0.965709	0.964988	0.961618	0.90091	0.961622	1.17299	0.986882	0.977618	0.978134	1.20782	0.866106	0.976378	0.796599	1.05048	0.998954	1.004	0.929695	1.31902	1.32062	0.789355	0.860398	0.94235	0.746614	0.761469	0.877684	0.757843	0.924361	0.83385
A0A087WZ13	RAVER1	6	1	1.04656	1.26179	0.915822	0.87188	0.953298	0.861181	1.09576	0.976267	0.883206	1.28968	0.752758	1.1274	1.23183	0.859217	1.26643	0.743928	0.954532	1.2319	0.890098	1.36744	1.12803	1.36707	1.03213	1.42752	0.9259	1.23535	1.57264	1.09301	0.886966	0.684036	0.946931	0.958815	0.880037	0.837165
A0A087WZE9	HMGN3	54	1	0.529708	0.820532	0.834058	0.887577	0.929353	1.03985	1.15133	0.987924	1.41475	1.6841	1.0994	0.869956	1.02465	1.14355	0.880094	1.03844	0.969072	1.10245	1.05391	1.12282	1.07644	1.28843	1.30993	1.25935	1.18146	1.12015	0.820622	1.32924	1.12365	1.00368	0.459551	1.14732	1.06108	0.992242
A0A087WZP9	LIME1	7	1	0.804466	0.872703	0.880626	0.914833	0.884945	0.822708	1.66018	1.04304	1.57153	1.30984	1.18797	1.21119	0.770364	1.03301	0.719817	1.00188	1.18006	1.16207	1.08409	1.37868	1.28552	1.29092	1.08763	1.18873	0.848374	1.38682	0.700603	1.5376	1.181	1.02481	1.03704	2.32833	1.74394	1.4912
A0A087WZV0	PPIP5K2	11	0.9993	0.753324	0.961202	0.878978	0.77984	1.14104	1.04328	1.03728	0.872327	0.87955	1.47533	1.25487	0.912133	1.02685	0.828134	0.657735	0.790615	0.935582	1.28706	1.48091	1.73209	1.34622	1.24836	2.08851	1.34992	1.08027	0.974068	1.04907	1.1805	1.60243	1.02571	1.23431	1.07718	1.2881	0.86592
A0A087X0I6	MARK1	1	0.9998	NA	NA	NA	NA	NA	NA	1.02821	1.35566	NA	NA	NA	NA	NA	1.137	1.18427	NA	1.41825	NA	NA	NA	NA	NA	NA	NA	NA	1.05481	NA	1.15151	NA	1.15387	NA	NA	NA	NA
A0A087X0K9	TJP1	355	1	1.05298	0.990079	0.928073	0.95711	1.11666	0.960191	1.0077	1.06359	0.953539	0.903035	1.06462	1.12031	0.964804	0.976009	1.13487	0.855682	1.0406	1.1222	0.945789	0.933417	0.993579	1.04252	1.01292	0.861381	1.09006	1.14349	1.15711	1.00568	1.29795	1.23998	1.23292	1.19656	1.16945	1.35015
A0A087X0T8	CADM1	41	1	1.12354	1.22145	0.904354	1.02096	1.05175	0.998389	1.07501	0.885183	1.1567	0.987944	1.1583	1.22549	1.27333	1.08969	1.05276	1.0617	0.920039	0.801554	1.06848	1.06353	0.895505	0.825775	0.961827	0.955947	0.798471	1.03539	0.902387	0.858707	0.990768	0.805959	0.899947	0.776347	0.846383	0.682547
A0A087X1K9	LYPLA1	59	1	1.19497	1.03428	1.19687	0.9894	1.02199	1.10278	1.06247	1.10614	1.08743	0.96901	0.974846	0.95305	1.21896	1.068	0.957909	1.07206	1.11138	1.02395	0.779809	0.699539	0.634955	0.810385	0.702802	0.900818	0.783975	1.0324	0.906529	0.81686	0.647849	0.700069	0.581037	0.712775	0.534675	0.57361
A0A087X1V2	NCAM1	13	1	0.956842	1.29895	1.30917	0.808345	0.980614	0.989933	1.15549	0.910165	1.10079	1.07045	1.18553	1.0922	0.903216	0.818573	1.12637	1.25172	0.786643	1.12616	0.759113	0.985915	0.68169	1.11924	1.01014	0.747138	0.616402	0.965841	0.658783	0.686605	1.0445	1.28176	0.609849	1.33109	0.47588	0.785909
A0A087X2C4	PCDH7	248	1	1.18334	1.03504	1.01599	0.954228	1.03714	1.09489	1.06126	0.91631	1.05356	1.08497	1.05555	1.11033	0.986427	0.998109	0.992852	0.9631	1.01124	1.05639	1.00128	1.13213	0.995995	1.05471	0.938454	1.08004	0.987737	0.970838	1.02829	1.06429	1.10272	1.09072	0.938309	1.10996	0.916745	1.09916
A0A087X2I1	PSMC6	240	1	1.41103	1.09836	1.10149	1.01575	1.22372	1.03555	1.04562	1.00631	0.928948	0.928185	0.961004	0.945315	0.957859	1.08598	1.10945	1.15336	0.907744	0.903061	0.857611	0.942688	0.9497	0.874928	0.83968	0.906959	1.00763	0.9334	0.942004	0.870769	0.897529	0.953407	1.04958	0.879493	0.936976	0.891196
A0A088AWN3	DOCK9	61	1	1.39636	0.842875	1.01384	0.970143	1.00209	1.01786	1.06562	0.973194	0.836799	0.890111	0.974253	0.862728	0.970191	0.889294	0.993819	1.18155	0.94824	1.0542	1.07206	0.799776	1.00995	0.949353	1.04516	0.989285	1.00064	1.08274	1.0356	0.967173	1.02956	1.27766	1.3395	1.1923	1.35811	1.2753
A0A096LNZ9	ISG15	44	1	0.910825	0.897513	0.906246	0.919433	0.862434	0.759619	1.60809	0.8445	0.982264	1.099	1.00732	1.00435	1.19011	1.19833	0.877925	0.952466	1.08591	1.0359	1.05226	0.917451	0.975456	1.32646	1.17943	1.10081	1.21205	1.03657	0.834853	1.0614	4.1065	0.835987	0.961995	1.14703	1.13929	0.955545
A0A096LP01	SMIM26	6	1	0.829002	0.932105	1.31911	0.930214	0.982217	0.964197	1.00913	1.04056	1.48338	1.15015	1.20846	1.15378	1.1643	1.04594	1.08624	0.813995	1.1974	1.241	1.02978	1.20533	0.976154	1.25319	1.55968	1.23737	1.02303	0.973498	1.15764	1.40837	1.7039	1.07698	1.43774	1.42725	1.6743	1.12203
A0A096LP25	AAK1	48	1	1.11271	1.62185	1.02597	0.882202	0.981108	0.953213	1.04941	1.1817	0.877651	0.903181	0.959805	1.20927	1.06931	0.966375	1.41132	0.947537	0.993	0.638003	0.863342	0.807106	0.771616	0.775773	0.679167	0.862155	0.690602	0.852461	0.856	0.887733	0.7688	0.826989	0.667019	0.593261	0.718456	0.727019
A0A096LP52	STXBP1	41	1	1.02659	0.948987	1.0174	0.934086	0.899445	0.834186	1.02908	1.02545	1.22946	1.1156	0.992496	0.979834	0.844377	1.22856	1.07372	1.07518	0.874488	1.43593	0.833628	1.02243	0.887286	0.920247	0.916712	1.13939	1.12137	0.913959	0.96043	0.953256	1.12837	1.18053	0.952619	0.986339	1.15874	1.04146
A0A096LP60	AAK1	5	0.9996	NA	0.58341	1.16488	NA	NA	1.25613	1.38424	1.19641	1.11341	1.09996	0.999909	NA	0.757661	0.566029	1.06258	NA	0.575109	0.967786	0.606304	2.33843	NA	1.49185	1.17661	1.29186	NA	1.00128	0.7265	1.60886	1.54791	3.58655	1.95841	1.50813	NA	NA
A0A096LP69	CD99	8	1	1.07606	0.838334	1.01034	1.16633	0.764375	0.804761	1.09567	1.17093	1.0597	0.993695	0.82517	1.10953	0.684982	0.920225	0.836847	0.559917	1.13045	1.4487	0.975333	1.94288	1.35245	1.55444	1.35659	1.39976	1.2862	1.1491	1.00236	1.82867	1.37274	1.30395	1.00805	1.57858	1.70617	1.53297
A0A096LPE2	SAA2-SAA4	36	1	0.644775	1.14804	0.764042	0.600088	1.06179	1.4316	0.697394	0.863192	1.31627	0.939412	0.99223	0.9973	0.906704	0.692689	0.767194	1.06928	1.31263	0.731023	1.04407	1.83626	1.00629	1.63327	1.10741	1.57786	1.20682	1.02698	1.39703	1.86091	2.72684	1.24757	1.08662	0.993552	1.18716	1.05086
A0A0A0MQU4	SCLY	92	1	0.945166	1.07674	1.07732	0.977709	1.13299	1.10881	1.05296	0.998365	1.18168	0.910186	0.930716	0.870508	1.10583	1.23857	0.957999	1.07311	0.936292	0.960199	0.969224	0.799947	0.795253	0.912719	0.859016	0.931546	0.937835	1.04399	1.06747	0.911078	0.668267	0.900865	0.885174	0.783645	0.832035	0.719848
A0A0A0MR08	USP19	3	0.9983	0.718584	1.12482	0.957807	0.941253	1.01757	1.12023	NA	NA	1.04419	0.945355	1.09596	0.750062	1.10728	NA	NA	1.00439	NA	1.3709	1.45525	1.27097	1.00595	1.05636	1.31716	1.30241	0.997805	NA	1.36491	NA	1.12955	NA	1.12557	0.934657	1.22861	1.25135
A0A0A0MR39	MYEF2	219	1	0.974648	1.07014	1.05919	0.858959	1.07148	1.06234	0.967092	0.882135	1.11589	1.16541	1.06228	0.899164	0.89157	1.05726	1.16232	1.10485	0.95098	1.22018	0.9421	1.01838	0.79789	0.907367	0.887202	0.975605	0.993693	0.903853	1.18934	0.786525	0.97577	0.989801	0.819774	0.983469	0.980264	1.04637
A0A0A0MR89	NRXN3	420	1	1.25676	1.12122	1.16178	0.990743	1.07011	1.02128	0.971123	0.830104	0.986373	0.975789	1.09101	0.996517	1.09976	1.07153	1.12422	1.06109	0.868959	0.890915	0.952078	0.935478	0.91646	0.953131	0.873846	0.877103	0.834321	0.864371	0.913669	0.906817	0.910968	0.967929	0.956297	0.960565	0.925082	0.967952
A0A0A0MRF6	AKAP9	10	0.9939	0.96054	1.25853	0.947049	1.08226	0.935985	1.15951	1.25642	1.00355	1.05171	0.9671	0.976024	0.878867	1.16875	0.951865	1.11186	0.942881	0.778419	0.811597	0.775022	0.733104	0.79794	1.01797	1.07483	0.733775	0.845546	0.856393	0.869494	0.866542	1.13302	1.0881	0.685307	0.552273	0.764263	0.766616
A0A0A0MRG9	CDK5RAP2	6	0.9986	0.901506	0.762801	1.03818	0.992253	1.01548	0.804669	0.911523	0.964851	0.91542	0.995107	0.810716	0.994904	0.883772	0.939376	1.01365	0.910001	0.934018	1.21643	1.33509	0.873189	1.2016	1.02167	1.10687	0.961735	1.35605	1.07861	1.49121	1.0182	1.45067	1.18244	1.85567	1.43244	1.53436	1.2341
A0A0A0MRJ3	NAV1	79	1	0.997443	0.933194	0.907031	0.950473	0.952791	0.924827	0.884511	0.953558	0.955199	0.962272	0.953236	0.983529	1.09888	0.95161	1.1024	0.844448	1.03659	0.93764	1.12995	1.1069	1.02636	1.06583	1.10557	1.03577	0.875236	1.05239	1.12444	0.997212	1.16747	1.08041	1.11323	1.10038	1.07362	1.10321
A0A0A0MRL7	CASP7	6	0.9986	0.977375	0.655652	1.11065	1.0519	1.18022	0.709318	1.13759	1.17112	0.538939	0.879203	0.780713	1.05047	0.883962	1.21243	0.688301	1.38842	1.14679	1.01059	0.866801	0.9155	1.0941	1.25757	0.902942	0.701974	1.8666	1.46167	1.25996	1.22881	0.837738	1.04811	1.01536	0.903028	0.808908	1.12383
A0A0A0MRX1	ELAVL2	98	1	1.00841	1.06639	1.02036	0.914817	1.21806	1.19295	0.883001	0.875086	1.25083	1.00021	1.04305	1.00295	0.952575	1.01346	1.15135	0.964592	1.08038	0.960695	0.95183	0.863999	0.659715	0.802905	0.859009	0.883141	0.909192	0.98503	1.02739	0.738547	0.668575	0.94341	0.813658	0.845355	0.931643	0.7775
A0A0A0MRZ8	IGKV3D-11	25	0.9999	1.20515	1.10125	0.964943	1.3006	1.11769	1.41166	0.77121	0.550738	0.701366	0.502219	0.846196	1.07984	1.30538	0.759569	1.54302	0.815586	0.800867	0.912889	1.64436	1.42036	0.957568	1.10946	1.23294	1.09912	1.48225	1.26126	0.760698	2.01557	2.22179	0.968991	0.954946	1.27653	2.25284	2.03828
A0A0A0MS15	IGHV3-49	8	0.9999	0.666628	1.51109	1.3795	1.54601	1.29358	1.6658	0.574891	0.612421	0.703224	0.701678	0.917473	0.626221	1.71485	0.75992	1.35923	0.567224	0.672765	0.876754	1.42183	1.64544	0.796844	0.932792	1.04965	1.44947	0.882613	1.30685	0.706783	2.63525	1.2631	1.21792	0.655131	0.837762	1.73327	1.7563
A0A0A0MS48	DENND1A	59	1	1.06919	1.0735	0.967074	0.981886	0.957486	1.04358	1.08879	1.0238	0.999916	1.03301	0.97306	1.08239	1.02424	0.974132	1.11897	0.995385	0.899309	1.11661	1.08245	1.18456	1.22965	1.16539	1.06623	1.16967	1.14771	1.05826	1.02034	1.16075	1.09295	1.25323	1.21152	1.30677	1.02878	1.07514
A0A0A0MSN9	NELFE	3	0.9997	NA	0.851099	0.904048	NA	NA	1.10665	NA	NA	1.16179	0.942499	1.38153	NA	0.996246	NA	NA	NA	NA	0.861072	1.19218	0.786494	NA	0.797347	1.14206	1.04462	NA	NA	1.05478	NA	1.32031	NA	1.49048	2.10529	NA	NA
A0A0A0MT09	PPP1R8	19	1	0.879649	1.03144	1.08897	1.06553	1.03241	1.03116	0.990202	0.815827	1.01985	1.1765	0.996203	1.06221	0.956759	0.833984	1.09468	0.915348	0.797807	0.974682	1.04682	1.11691	1.12478	0.962449	1.11737	0.98135	0.96886	0.987344	1.44646	1.26209	1.02264	1.08004	1.10729	0.916304	0.905603	1.01072
A0A0A0MT33	SCAF8	13	0.9998	0.816714	0.820607	0.807282	0.992805	1.12292	1.11697	1.29099	1.17948	0.788317	1.02535	1.16967	1.03496	0.967357	1.20312	1.0985	0.940035	1.37189	1.18119	1.28747	1.3778	1.26285	0.964985	1.04604	1.08655	1.42782	1.3601	1.01592	1.48727	1.00927	1.62939	1.38084	1.56811	1.52007	1.28758
A0A0A0MT35	PRXL2B	81	1	1.22856	1.12266	1.06243	1.01106	0.961321	0.913025	1.09954	1.11148	1.31242	1.14224	1.04872	0.736754	1.34941	1.19613	0.862847	1.09647	1.04837	0.844153	0.682332	0.776021	0.77313	0.887392	0.855813	1.07007	0.80334	0.915454	0.806917	0.793253	0.725549	0.695954	0.56688	0.70603	0.517585	0.554902
A0A0A0MT69	IGKJ4	2	0.9985	0.94954	NA	NA	1.14758	1.11479	NA	NA	NA	NA	NA	NA	0.884771	NA	NA	NA	1.05339	NA	NA	NA	NA	0.958232	NA	NA	NA	1.22385	NA	NA	NA	NA	NA	NA	NA	1.43329	1.24527
A0A0A0MT72	CCM2	45	1	1.14704	1.08841	1.06203	0.980438	0.970399	1.03432	1.00086	0.954728	1.045	1.03894	1.08367	0.979821	1.08297	1.23933	1.15242	1.00667	1.07356	1.05542	1.11896	1.0092	0.789652	0.94421	0.96371	1.00201	0.815698	1.13317	1.13506	0.858874	0.984963	1.08821	1.16584	0.899806	0.68573	0.893247
A0A0A0MT89	IGKJ1	6	0.9998	0.883028	0.999533	1.33433	1.39607	1.41021	1.00107	0.805763	0.720516	0.613307	0.534907	0.936147	0.970604	1.04127	0.845982	1.07713	0.797976	0.692168	0.991898	1.69083	0.961251	0.817619	1.39315	0.969662	1.05723	1.22693	1.0918	0.755757	1.43166	1.04572	1.02797	0.99273	1.08358	1.39326	1.19999
A0A0A0MTE2	LMO7	364	1	1.06195	1.24563	0.976748	0.876028	0.932898	0.972434	0.99089	0.992554	1.097	1.05262	1.06644	1.28742	1.07903	1.03111	1.14893	0.9277	0.977565	0.979427	0.927808	0.923402	0.973687	1.03556	0.959259	1.06043	0.823298	0.840845	0.976517	1.04355	1.07578	0.995857	0.942425	1.07141	0.976732	1.02245
A0A0A0MTL6	RIPOR1	50	1	0.895729	0.847089	0.942796	0.863692	0.860104	0.953062	1.01362	0.981779	0.982566	1.11924	1.01724	0.96186	0.921885	0.978489	0.96567	0.963663	1.01362	1.13299	1.0888	1.18437	0.905159	1.07309	1.01956	1.0338	0.908952	1.02869	0.96961	1.06192	1.17608	1.22019	1.23541	1.19409	1.15158	1.11102
A0A0A0MTP4	DLGAP1	136	1	1.27467	1.1142	0.910342	0.927449	1.0416	0.988001	0.909898	0.968057	1.07502	1.01316	1.06293	1.0689	1.13016	1.11909	1.12883	0.956653	1.07893	1.00359	0.894078	0.949617	0.90724	0.902641	0.909488	0.960488	0.811569	0.846493	0.992269	0.851601	0.881565	0.988117	1.09688	1.11218	1.06638	1.09518
A0A0A0MTS7	TTN	20	0.9979	0.89595	0.748004	0.825615	1.07696	1.0256	0.970985	1.0271	0.9276	1.30583	1.07594	1.08756	1.18729	1.18234	1.14277	1.0844	0.905588	1.03831	1.29024	0.997862	1.07771	1.01267	1.03473	1.18562	1.14063	0.989135	1.10486	0.879967	0.839342	1.22769	1.09856	0.790782	1.09154	1.32509	1.3179
A0A0A6YY99	TNFSF12-TNFSF13	34	1	0.681553	0.800894	0.73361	0.897744	0.917613	0.908216	1.10719	1.18166	1.20439	1.074	1.03358	1.01318	0.964319	0.936661	0.936446	0.746835	1.18643	1.19365	1.33429	1.58179	1.28985	1.2458	1.31133	1.22704	1.44666	0.981302	1.1137	1.2881	1.38535	1.29077	1.21096	1.26973	1.19891	1.39036
A0A0A6YYH1	C15orf38-AP3S2	152	1	0.90677	0.925243	0.967532	0.967119	0.995043	1.05882	1.00116	1.06254	1.24355	1.19463	0.995596	1.05213	1.05648	1.12419	1.00662	1.03817	0.936281	0.927273	0.867154	0.986094	0.992717	0.912024	0.773877	1.06149	1.21994	0.874729	0.919657	0.958261	0.943976	0.948636	0.927406	0.806496	0.849612	0.954151
A0A0A6YYL4	PAM16	131	1	1.03046	1.0374	0.986269	0.997744	1.00288	1.01253	0.928243	0.981276	1.15012	1.17167	1.04817	1.04329	1.114	0.996326	0.948218	1.08037	1.05827	1.0143	0.967996	1.0299	1.03285	0.983903	1.04311	1.14559	0.979811	0.987558	1.00453	0.985689	0.976623	1.11363	1.08132	0.878828	1.05362	1.05114
A0A0B4J1U3	IGLV1-36	2	0.9993	NA	0.81273	NA	NA	NA	0.84881	NA	NA	NA	NA	NA	NA	1.26679	NA	NA	NA	NA	NA	2.04679	0.822378	NA	NA	NA	1.17686	NA	NA	1.63971	NA	NA	NA	1.7172	NA	NA	NA
A0A0B4J1V8	PPAN-P2RY11	13	0.9999	0.682225	0.78245	1.02329	1.01267	1.10207	1.19398	0.967769	0.874593	0.985073	0.991982	1.02419	0.934333	0.975213	0.851244	0.950806	0.935255	0.980389	1.19853	1.35694	0.638908	0.949632	1.2163	1.02652	0.764728	1.09109	0.971776	1.08388	1.10883	1.51771	1.20363	1.38991	1.53209	1.43806	1.09275
A0A0B4J1Y8	IGLV9-49	2	0.9999	0.778837	NA	NA	1.31694	0.989581	NA	NA	NA	NA	NA	NA	0.838175	NA	NA	NA	0.838604	NA	NA	NA	NA	1.33518	NA	NA	NA	0.849702	NA	NA	NA	NA	NA	NA	NA	1.31969	1.68525
A0A0B4J269		219	1	1.39347	1.31336	1.12924	1.11116	1.14143	1.07548	0.875611	0.924387	1.07851	1.00456	1.14023	0.985535	1.07519	1.24682	1.17839	1.10341	0.994214	1.0575	1.06374	0.611504	0.675618	0.569007	0.632486	0.725373	0.626943	0.838297	0.93362	0.615214	0.776878	0.818511	0.644492	0.680864	0.663597	0.707068
A0A0B4J294	TRAPPC2L	72	1	0.829389	0.953207	0.84751	1.06565	0.906173	0.846252	1.0148	1.10826	1.28211	1.1928	1.01491	1.14547	1.06023	1.1196	1.00477	1.02191	1.06044	1.13005	1.05281	0.882314	1.04308	1.01849	1.10178	1.0273	1.05684	0.892957	0.91817	1.23076	1.1041	1.22745	1.00105	1.12848	1.28068	1.1091
A0A0B4J2B5	IGHV3OR16-9	7	1	0.995939	1.14314	0.975377	0.823728	0.694332	0.857253	0.917346	0.829716	0.59623	0.835104	0.837469	0.952336	0.827568	0.96443	0.911015	0.987812	0.930637	0.595595	0.89177	0.664884	0.810607	0.759255	0.646792	0.937116	1.95344	1.06887	1.25472	1.14403	1.28652	0.975018	1.64718	1.24319	1.13927	1.81253
A0A0B4J2D5	GATD3B	160	1	1.35848	1.16087	1.20949	1.10471	1.00748	1.16051	1.02091	1.36855	1.19407	0.949392	0.994014	0.962423	0.967786	1.36862	0.958483	1.18591	0.86528	0.957488	0.604306	0.660587	0.665247	0.927496	0.682633	0.858517	0.89186	0.791545	0.540386	0.776062	0.66732	0.798997	0.71301	0.694287	0.565601	0.723474
A0A0B4J2D9	IGKV1D-13	5	1	0.816113	1.16759	1.08523	1.0642	1.6698	1.49782	0.941661	1.0684	1.13194	1.03679	1.32941	1.26921	1.33463	0.811594	0.920709	0.75363	0.895221	1.52368	2.038	0.974054	1.64607	1.55445	1.54662	1.3735	0.926282	1.24025	1.56902	1.2226	1.76341	1.20432	1.64605	0.845637	0.733102	1.73441
A0A0B4J2F0	PIGBOS1	11	1	1.1607	1.00613	0.880164	1.20217	1.12786	0.971196	1.12412	1.03306	0.696463	1.05518	1.00177	1.01323	1.01663	1.13709	0.984289	1.09846	0.995705	0.898611	0.642341	1.05598	0.919165	1.33317	1.31426	1.19309	0.906595	0.921307	0.998802	1.07907	1.17822	1.11753	0.521454	1.15608	1.26786	1.33261
A0A0C4DFM0	GSTZ1	104	1	1.00428	0.917084	1.11003	0.94512	1.44955	0.844495	0.829749	0.936576	1.04245	0.81029	1.08628	0.926737	1.10258	1.06913	0.885889	1.07084	0.921916	0.89268	0.869326	1.06606	0.765096	1.05922	1.07276	1.13292	1.38296	1.00287	1.1051	1.22148	0.872254	0.642548	0.581454	0.540204	0.591438	0.678855
A0A0C4DFV9	SET	162	1	1.25871	1.09855	1.06046	0.931419	1.01077	1.05809	0.929073	0.835686	1.21221	1.0107	1.03119	1.11051	1.23038	1.1607	1.01598	1.12126	1.19565	0.831302	0.689165	0.639651	0.714926	0.825575	0.663473	0.901933	0.772757	0.968546	1.02451	0.914129	0.595336	0.587209	0.420384	0.54209	0.536598	0.531977
A0A0C4DG33	PEX1	7	0.9999	1.09411	1.07066	1.16302	1.07798	1.34891	1.32227	1.05073	0.865181	0.881963	0.945301	1.13289	0.851088	0.98758	0.915364	1.80782	0.972315	0.869066	1.07967	1.2556	0.873	1.06687	1.13206	1.04563	1.11307	0.810416	0.933542	1.0506	0.885617	1.22677	0.880525	1.02814	1.08148	0.737774	1.03644
A0A0C4DG45	SEMA4D	3	0.9982	0.56712	0.785097	NA	0.795903	0.931549	1.00592	NA	NA	NA	NA	NA	0.935251	0.717073	NA	NA	0.681684	NA	NA	1.55114	1.29201	1.06264	NA	NA	0.933194	1.07473	NA	0.909002	NA	NA	NA	1.08766	NA	1.54448	1.21934
A0A0C4DGB0	SCOC	17	1	1.07366	1.38967	1.06218	1.0661	1.07597	0.947791	0.781188	0.989164	1.13651	1.06883	0.853092	1.02275	1.23296	0.919001	1.05354	1.33289	1.01087	0.83675	1.43823	0.769061	0.832587	0.914415	0.720882	0.994622	0.960663	0.970485	1.34851	0.861259	0.672082	0.576549	1.33132	1.49833	1.66689	0.99714
A0A0C4DGB9	PPA2	1	0.9988	NA	1.04534	NA	NA	NA	1.20707	NA	NA	NA	NA	NA	NA	0.755097	NA	NA	NA	NA	NA	0.882331	1.32053	NA	NA	NA	0.939998	NA	NA	0.920602	NA	NA	NA	1.11847	NA	NA	NA
A0A0C4DGH8	TTC8	6	1	1.27669	NA	0.948619	1.04509	1.01203	NA	0.981941	0.965741	0.607787	0.820379	0.904757	1.04393	NA	1.28029	1.11829	0.982864	1.16266	0.86802	NA	NA	0.913233	1.02761	0.770019	NA	0.981899	1.14956	NA	0.950029	0.865878	0.979683	NA	0.778685	0.801413	0.823395
A0A0C4DGN6	GIT1	271	1	1.35405	1.19202	0.966278	0.921269	0.945421	0.928127	0.897252	1.01135	0.961207	1.03606	0.962306	1.05081	1.16422	1.09215	1.11268	1.01734	1.02785	0.968978	0.875631	0.907467	0.904945	0.889054	0.886794	0.918982	0.834223	0.934713	1.00919	0.887506	0.959395	1.034	1.11153	1.09536	1.04052	1.03045
A0A0C4DGT3	IQSEC1	5	1	0.55706	0.958199	0.908732	0.695269	0.725743	1.18284	0.997758	1.0072	1.06501	1.09373	0.986024	0.684988	0.900993	0.890098	0.783858	0.737155	1.00875	1.20101	1.32568	1.45651	1.06327	1.39893	1.4171	1.21815	1.41986	1.19975	1.07269	1.42277	1.37631	1.36763	1.14961	1.11498	0.761259	0.889925
A0A0C4DGV1	MYEF2	7	1	1.0528	0.96452	0.939386	1.02488	1.21848	1.09442	0.860652	0.899222	0.99048	0.925671	0.931294	0.844949	0.897272	0.842017	0.925276	1.00992	0.807962	0.869423	0.927497	1.24911	1.07997	1.09934	1.01056	0.824828	1.28444	0.845752	0.771211	0.863546	0.97854	1.14243	1.3788	0.753825	0.891064	1.26358
A0A0C4DH07	LTBP4	1	0.9998	NA	NA	NA	NA	NA	NA	0.915287	0.972568	NA	NA	NA	NA	NA	0.863779	0.841927	NA	1.10413	NA	NA	NA	NA	NA	NA	NA	NA	0.84896	NA	1.25137	NA	1.33466	NA	NA	NA	NA
A0A0C4DH25	IGKV3D-20	8	1	0.721844	1.00466	1.05485	0.926344	1.08795	1.25491	0.919001	0.815529	0.853661	0.635395	0.951787	0.836723	1.23557	0.940377	1.13446	0.750194	0.967365	1.02602	1.97123	1.4044	1.32005	1.29966	1.21633	1.07783	0.95964	1.14307	0.942188	1.94009	2.08239	1.28001	1.20385	1.07514	3.01753	2.01754
A0A0C4DH31	IGHV1-18	1	0.9978	0.911904	NA	NA	1.11447	1.1262	NA	NA	NA	NA	NA	NA	1.15918	NA	NA	NA	1.12853	NA	NA	NA	NA	1.5738	NA	NA	NA	1.15581	NA	NA	NA	NA	NA	NA	NA	1.6034	1.89432
A0A0C4DH34	IGHV4-28	7	1	0.920103	1.27752	1.35994	1.53352	1.47672	1.19958	0.76156	0.563004	0.612896	0.610451	0.7652	0.90131	1.61064	0.613824	1.06826	0.752609	0.720565	0.959896	1.14192	1.99288	0.838372	1.89317	0.902539	1.23641	1.11653	1.05852	0.901621	2.23783	0.824697	0.802978	0.602713	0.71676	1.37838	0.957435
A0A0C4DH36	IGHV3-38	1	0.997	NA	1.45341	NA	NA	NA	1.18472	NA	NA	NA	NA	NA	NA	1.06089	NA	NA	NA	NA	NA	0.899841	0.720485	NA	NA	NA	0.848574	NA	NA	0.981276	NA	NA	NA	0.851655	NA	NA	NA
A0A0C4DH38	IGHV5-51	10	1	1.58408	0.990321	0.921345	1.13575	1.31115	1.17258	0.718998	0.877945	0.709046	0.921629	0.580072	0.824246	1.01207	0.625215	0.810326	1.29039	0.871009	1.38929	1.20438	0.918723	1.55407	1.13884	1.38661	0.950556	1.34969	0.728213	0.966823	0.817078	1.26332	0.76376	1.04748	1.535	1.08073	2.16455
A0A0C4DH41	IGHV4-61	7	1	0.869269	1.21605	1.30931	1.54115	1.38802	1.45265	0.94321	0.467419	0.771359	0.739218	0.814035	0.761627	1.07025	0.653874	1.26996	0.608574	0.576994	0.877653	1.06275	1.6392	1.17019	1.12673	1.11707	1.25698	1.99145	0.950326	0.816746	1.72374	1.37492	1.53613	1.34449	1.48508	3.5371	2.655
A0A0C4DH86	ATP2A2	2	0.9956	NA	NA	0.693536	NA	NA	NA	0.715159	0.971291	0.758794	1.10376	0.733998	NA	NA	1.13579	1.08881	NA	1.12871	0.701245	NA	NA	NA	1.08071	1.28286	NA	NA	0.641434	NA	0.894004	0.814016	1.35738	NA	1.38105	NA	NA
A0A0D5XQ77	HLA-DQB1	2	0.9981	0.857674	NA	NA	0.862024	1.07942	NA	1.10466	0.804687	NA	NA	NA	0.721582	NA	0.703038	0.952795	1.00981	0.905975	NA	NA	NA	1.39195	NA	NA	NA	1.14803	0.92248	NA	1.14913	NA	1.29672	NA	NA	1.14813	0.915094
A0A0D9SEJ5	FAM120B	66	1	1.25539	0.982565	1.05429	1.0154	0.972701	0.933936	0.868738	0.942365	0.867596	0.934143	0.947164	0.946995	0.970688	1.03829	1.00745	1.00905	1.03792	0.915192	1.03236	0.906216	0.942368	0.93631	0.865528	0.883911	0.955326	0.936761	1.05512	0.882725	0.889699	0.69724	0.940518	0.940309	1.00833	0.925478
A0A0D9SF30	NCAM1	115	1	1.77968	1.4256	1.70954	0.859526	1.17032	1.06106	1.2601	0.928236	0.796612	0.712212	1.0098	1.17944	1.04808	0.914376	1.29478	1.15043	0.763833	0.544074	0.686067	0.701461	0.646131	0.628216	0.575446	0.883469	0.693335	0.6381	0.719681	0.670543	0.678297	0.660542	0.566095	0.613772	0.658362	0.598249
A0A0D9SF53	DDX3X	179	1	1.16382	1.00964	1.03903	0.935096	1.08158	1.0181	0.881024	0.925542	0.922865	0.971926	0.986962	0.858298	0.879278	1.03054	1.11582	1.05738	1.03864	1.11024	1.05543	0.967164	0.891543	0.89053	0.92655	0.915221	0.990497	1.03146	1.12588	0.93267	1.04218	1.17566	1.29208	1.17678	1.03288	1.22147
A0A0D9SFE4	DNM1	8	0.9991	0.901248	0.919336	1.02727	0.705593	0.687064	0.977043	0.59152	0.606711	0.762906	0.669089	1.02109	0.877246	1.07101	0.953123	1.02451	1.07452	0.910869	0.856245	1.00229	0.831464	1.01692	1.38261	0.878349	0.97687	0.854227	1.07951	1.32071	0.613323	1.1332	1.42514	0.850388	0.929423	0.66546	1.00323
A0A0D9SFF6	SPTAN1	2076	1	2.8472	1.09713	1.13188	1.07527	1.16221	1.03603	0.772561	0.880469	0.766741	0.694342	0.935515	0.954255	0.917118	0.868898	0.989043	1.07281	0.753979	0.757138	0.839996	0.713357	0.714285	0.704903	0.65368	0.736436	0.787798	0.904782	0.917419	0.763657	0.736604	1.05613	0.977153	0.868133	0.77491	0.795254
A0A0D9SGD0	SLC12A5	11	1	0.737819	0.507114	1.12671	0.835637	0.896748	1.02844	0.959419	1.02925	1.25075	1.82062	1.28157	0.799735	1.42355	0.8995	0.952484	0.909207	0.981484	0.651803	1.26501	1.55846	1.06562	1.13785	1.22349	1.39675	1.06053	0.899661	1.37135	1.0946	1.01675	1.90047	1.27103	1.38309	0.841248	0.623609
A0A0D9SGH0	SLC9A6	1	0.9993	1.19542	NA	NA	1.31287	1.09533	NA	NA	NA	NA	NA	NA	0.957459	NA	NA	NA	1.10563	NA	NA	NA	NA	1.31951	NA	NA	NA	1.45207	NA	NA	NA	NA	NA	NA	NA	1.41294	1.17077
A0A0G2JH50	HLA-C	4	1	NA	NA	0.620441	NA	NA	NA	1.02711	0.457621	3.41657	1.06214	0.486104	NA	NA	0.372962	2.72206	NA	3.26162	0.801629	NA	NA	NA	0.539923	2.02178	NA	NA	0.479309	NA	0.62988	0.487035	0.879337	NA	0.826891	NA	NA
A0A0G2JHM8	MOG	9	1	0.742147	0.850931	0.855557	1.05931	1.05098	1.0531	1.3822	0.936596	1.09652	1.34157	1.01373	0.867129	0.834149	1.20304	0.991587	1.20592	0.671847	1.32228	1.0951	1.35017	1.15668	0.91995	1.06227	1.13309	0.863832	0.991242	0.936351	1.1694	1.12549	1.1626	1.16257	1.10481	1.08815	1.25864
A0A0G2JIF2	HLA-A	118	1	1.1992	0.908517	0.98348	0.926377	0.962921	0.95744	1.25419	0.793086	0.730007	1.08591	0.92239	0.92129	0.873028	0.986271	0.953697	0.954191	1.31366	0.802795	1.3395	0.804934	0.912519	0.966851	1.00508	1.23273	1.09891	1.21993	1.16628	1.13766	1.05683	0.877571	0.861769	0.786245	0.805089	0.724779
A0A0G2JL69	C2	13	0.9999	0.781153	1.17462	0.906716	1.42916	1.01055	1.15205	1.21566	0.821994	0.879719	0.8349	0.755305	1.02679	0.896895	0.783032	0.774265	1.38545	0.93246	0.820703	1.18545	0.704756	1.35383	0.999312	0.846391	0.896986	0.804441	0.891765	0.938284	0.962673	0.9595	0.716532	0.700116	0.906499	0.933486	1.3836
A0A0G2JLQ0	LAIR2	10	1	0.734556	0.882853	0.88618	1.00431	1.07184	1.11791	1.04806	0.864887	1.06715	1.04316	0.976693	0.866649	1.00418	0.903072	1.00692	0.847957	1.05877	1.54342	1.20398	1.26705	1.00744	1.16306	1.37357	1.07823	1.02633	0.994609	1.16935	1.01967	1.52707	1.20042	1.40205	1.47235	1.28807	1.32883
A0A0G2JLV7	LAIR1	18	1	0.668262	0.95481	1.04542	0.745101	0.854708	0.914539	1.22307	0.955752	0.787808	1.52769	0.948412	1.09055	0.863577	0.788911	0.677741	0.778483	1.15755	1.08616	0.966321	0.961406	0.875728	1.06516	1.31604	1.10005	1.02989	1.17328	1.07167	1.7933	1.42876	1.54455	0.765499	1.38933	1.541	0.833023
A0A0G2JMB2	IGHA2	9	1	0.767504	1.17647	0.87405	2.12685	1.89855	1.05142	0.549038	0.422981	0.46762	0.477156	0.802973	1.3707	0.88022	0.744713	0.669597	0.825322	0.969822	0.793345	1.38749	0.796057	0.566795	0.785082	0.828003	0.504144	0.671724	1.28788	0.708596	1.14362	0.940342	1.10531	0.720904	1.00469	1.36285	1.2525
A0A0G2JMK5	MRPL55	4	0.9945	0.407986	0.401435	0.622472	0.435753	0.407785	0.640341	0.621663	0.399312	0.524059	0.554861	0.704804	0.499643	0.616022	0.769894	0.973573	0.310648	0.990197	0.598902	0.590964	1.76625	0.559988	1.23068	0.857427	0.640874	0.724551	0.707375	0.860291	0.946279	0.482746	0.601609	0.604144	1.10243	0.516892	0.433664
A0A0G2JPD3	HLA-A	57	1	0.695263	1.18389	0.961516	1.52978	1.44165	1.22434	0.94376	1.02735	0.745142	1.01785	0.802572	0.748004	0.868631	0.792814	0.793377	0.754914	0.840334	1.13966	1.09879	1.09858	0.956118	1.10786	1.11646	1.26834	0.802173	1.03421	0.948041	0.880173	1.11984	0.927085	1.09301	1.05783	1.05914	1.03446
A0A0G2JPD5	MAPT	6	0.9985	0.938488	2.01402	1.9697	1.31953	1.34764	0.681738	0.856647	0.422177	1.06581	0.293042	0.605693	0.622423	0.581009	1.43813	1.89853	1.33009	0.592896	0.546051	2.20145	0.902939	1.02826	2.32027	0.680061	1.97023	0.70317	1.08501	1.27422	1.57195	6.9653	0.618673	0.45259	1.14901	0.972204	0.752113
A0A0G2JQJ7	MAPT	4	0.9987	0.567678	0.648294	0.915577	0.95536	1.06863	1.84561	NA	NA	0.661938	0.942658	0.905692	0.900735	2.21365	NA	NA	0.961573	NA	1.16678	0.78336	1.09452	1.65064	1.39119	1.60301	1.84634	1.35832	NA	1.27856	NA	1.80251	NA	1.55695	1.63514	1.20827	1.27804
A0A0G2JQT1	CYFIP1	6	0.9999	0.589956	0.896304	NA	2.55577	2.05935	1.0918	0.421612	0.587074	NA	NA	NA	0.540427	1.04787	0.461121	0.601315	0.760971	1.39648	NA	1.52299	0.917661	0.817153	NA	NA	1.08944	1.93301	2.17293	1.46765	0.870475	NA	0.691558	3.92374	NA	0.633187	0.815988
A0A0G2JRQ6		6	0.9963	0.775173	1.00481	1.00266	1.22492	1.18739	1.39277	1.04205	0.639146	0.809363	0.603981	0.882204	0.862627	1.48664	1.05772	1.2779	0.841182	0.8134	1.55069	1.93875	1.4039	1.25684	1.43351	1.65018	1.52096	1.4777	1.41455	1.0219	2.10597	2.1487	1.50914	1.11914	1.19285	2.21922	2.39899
A0A0J9YVX5		4	0.9958	1.03081	1.03287	1.29957	0.838042	0.848335	0.877769	NA	NA	1.07071	1.03723	1.0358	0.871247	1.16791	NA	NA	0.98901	NA	1.01353	0.908838	1.06682	0.82858	0.918286	1.12265	1.21168	0.851814	NA	1.05054	NA	0.855104	NA	0.712393	0.951062	0.694434	0.713711
A0A0J9YWA1	CPNE5	229	1	1.24716	1.30245	1.37593	0.937713	1.2086	1.12375	1.04872	1.07289	1.23091	0.949503	0.935421	1.08742	0.89601	1.0071	0.955994	1.11929	0.768054	0.836432	0.955314	1.06894	0.855031	0.759534	0.722502	0.942066	0.860713	0.754033	0.89418	0.894626	0.594175	0.852699	0.835122	0.863256	0.941016	0.758459
A0A0J9YWN0	EPB41L3	24	1	1.2607	1.08623	1.01757	0.979228	0.917805	1.07938	0.869342	1.0641	1.20219	0.956764	0.892282	1.02062	1.0288	0.974918	0.985837	1.16665	0.849904	1.23943	0.846803	0.863036	0.876604	0.997285	0.975285	0.896321	0.896868	0.965289	0.974307	0.984368	0.828537	0.988169	0.938735	0.722556	0.990436	0.855523
A0A0J9YX35	IGHV3-64D	8	1	NA	0.859594	NA	NA	NA	0.705509	0.899175	1.05091	NA	NA	NA	NA	0.762907	0.914586	0.878029	NA	0.953224	NA	0.970685	0.84965	NA	NA	NA	0.737788	NA	2.67704	0.857803	0.958264	NA	0.861866	0.857666	NA	NA	NA
A0A0J9YX62	DNAJB6	147	1	0.965636	1.06087	0.973397	0.952908	0.938975	1.08665	1.13495	1.1624	1.29492	1.291	1.05297	0.956493	1.13701	1.06046	1.14643	0.979338	1.0531	1.0869	0.875932	0.946479	0.838756	0.795375	0.816763	0.971503	0.855241	0.812501	0.988591	0.708149	0.915571	0.85203	0.677233	0.873497	1.02137	0.832468
A0A0J9YX94	PNMA6F	79	1	0.867335	1.05354	1.02624	1.11901	0.994102	0.96713	1.05582	1.06104	0.935361	1.09898	1.11776	1.24043	1.04514	0.896323	0.989933	0.884943	1.1674	0.89891	0.989449	1.09758	1.1484	1.16638	0.98448	0.916133	1.12743	1.06034	0.981273	1.09036	0.998518	1.04201	1.1283	1.22839	0.952063	1.11863
A0A0J9YXF2	PON2	114	1	1.34402	0.963842	1.10501	1.05904	1.05106	1.27021	1.11112	0.993985	0.921139	0.896284	0.819272	0.848554	0.997522	0.993197	0.956288	1.53823	1.03213	1.15385	0.825109	0.774858	0.831236	0.917927	0.873681	1.10076	1.40183	1.23332	0.980051	0.929391	0.840462	0.897557	0.700129	0.678695	0.868206	0.714849
A0A0J9YXG2	BCL11A	8	0.9997	0.86525	1.10433	0.965913	0.903916	0.873664	1.07177	0.973349	0.905489	0.896693	1.07343	1.03495	1.0771	1.21389	0.903682	0.990871	0.996879	1.14994	0.949906	1.10566	1.02669	1.07815	1.07386	1.25632	0.897882	0.67986	1.02689	0.992981	1.20091	1.07131	0.94772	1.05118	1.00582	0.800774	1.06112
A0A0J9YXJ0	CELF2	175	1	1.11832	1.14989	0.975512	1.01166	1.07984	1.07798	0.98625	0.911348	1.22321	1.01813	0.995115	1.12091	0.964068	1.01764	1.19011	0.924091	1.02096	0.6989	0.829091	0.9313	0.826941	0.715525	0.755454	0.9155	0.886121	0.84363	1.00666	0.735165	0.673369	0.754495	0.692351	0.688098	0.709929	0.654157
A0A0J9YXT0	ARL6	1	0.9956	1.26442	NA	NA	1.20791	0.991814	NA	NA	NA	NA	NA	NA	1.13313	NA	NA	NA	0.903675	NA	NA	NA	NA	1.34688	NA	NA	NA	1.64792	NA	NA	NA	NA	NA	NA	NA	NA	1.33398
A0A0J9YY72	NHSL2	27	1	0.958047	0.943875	0.942495	0.931001	0.931677	0.98965	0.922906	0.969666	1.17788	1.14094	1.19152	1.38298	1.08606	0.847671	0.919871	0.775222	0.931861	0.580743	1.10848	1.2014	0.899228	1.21796	0.975344	1.00933	0.943138	0.899423	1.08176	0.893157	1.31316	1.17376	1.12663	0.607307	0.911981	0.980441
A0A0J9YY79	INPP5F	5	0.9994	0.358994	NA	0.856905	0.958265	0.548981	NA	1.71866	1.35108	1.62341	1.14365	1.30255	0.939156	NA	0.992888	1.10348	0.854066	0.943037	0.768863	NA	NA	1.07831	1.37595	1.52913	NA	0.855264	0.972665	NA	1.02288	1.22882	1.93344	NA	2.48986	1.73169	1.41653
A0A0J9YY99		10	0.9996	0.58587	1.20949	1.66913	1.1557	1.37174	1.64213	0.776671	0.432795	0.913101	0.418686	0.764687	0.963291	1.42793	0.819383	1.53877	0.910894	0.728956	0.585071	1.13664	1.37526	1.02042	1.27832	0.878524	1.64352	1.08914	1.02402	0.799377	1.27035	1.60224	0.801458	0.997518	0.988806	2.04565	2.61489
A0A0R4J2G7	NRXN1	282	1	1.29299	1.20103	1.18326	1.00414	1.07559	1.05162	0.987197	0.872484	1.02174	1.01593	1.05566	1.00382	1.04522	1.07439	1.1374	1.06907	0.806413	0.893029	0.917731	0.96944	0.93301	0.876911	0.897419	0.836607	0.863489	0.811206	0.917827	0.899414	0.996264	1.10015	0.897772	1.05905	1.09827	0.987551
A0A0S2Z377	ANXA6	43	1	1.79112	1.15922	1.89249	1.46802	1.48668	0.947952	1.44647	0.995288	0.525783	0.374049	0.536969	0.742237	0.854763	0.777162	0.755038	1.02002	0.696006	0.934215	1.1748	0.687406	0.999113	0.812493	0.848425	0.774328	0.967147	1.25852	0.735338	0.82228	0.427224	0.585383	0.550125	0.298266	0.651065	0.704945
A0A0S2Z471	CKB	4	0.9984	1.31148	1.08173	NA	0.919327	1.01678	1.23962	1.15758	1.1265	NA	NA	NA	1.11717	1.0076	1.41203	1.22651	1.31324	0.896273	NA	1.18283	1.06192	0.842409	NA	NA	0.91121	0.851735	0.901507	0.9796	1.03851	NA	1.0907	1.12542	NA	1.65203	1.40758
A0A0S2Z4L3	PROS1	5	0.9972	0.666803	0.795097	NA	1.03861	1.04726	0.857857	0.880148	0.930282	NA	NA	NA	1.17302	0.933057	0.797973	0.938944	0.967835	1.2031	NA	1.11145	1.168	1.19129	NA	NA	0.995515	1.35018	1.17987	1.14946	1.54216	NA	1.21543	0.991209	NA	1.05139	1.07525
A0A0U1RQE4	SH3D19	7	0.9995	0.869886	1.08511	NA	1.21058	0.933443	0.836237	1.22298	1.10996	NA	NA	NA	0.953159	0.901465	0.966407	1.01734	1.03633	0.795935	NA	0.826332	0.940423	1.17333	NA	NA	1.01227	1.14821	1.10349	0.940132	1.17596	NA	1.45006	1.11008	NA	1.62644	1.24097
A0A0U1RQI5	SORBS1	9	1	1.06104	0.800403	1.0066	0.930238	1.08355	1.19779	1.08514	0.897614	1.44915	1.24521	1.49517	0.890179	0.902807	1.02948	1.0204	1.05546	0.906348	1.31945	1.403	1.17079	1.12141	1.36707	1.35168	0.82126	0.908612	0.805909	1.08644	1.21587	1.3107	1.46791	1.54012	1.81177	1.38393	1.29821
A0A0U1RQI6	CLASP2	422	1	1.38911	1.13952	1.05967	1.10294	1.12148	0.97887	0.984571	1.014	1.00233	0.893112	0.976843	1.04817	1.1206	0.976439	1.05316	0.951706	1.01411	0.932937	0.871983	0.841809	0.789167	0.833942	0.790631	0.89019	0.776975	0.916361	0.94352	0.771343	0.803402	0.901078	0.845885	0.819703	0.79385	0.88003
A0A0U1RQK4	ADPRHL1	4	0.9994	0.726619	0.881956	NA	0.759314	0.752918	1.40826	NA	NA	NA	NA	NA	0.99724	1.52667	NA	NA	0.787238	NA	NA	1.80096	1.08598	0.96783	NA	NA	1.09826	0.697448	NA	1.14393	NA	NA	NA	1.25677	NA	0.937131	1.09914
A0A0U1RQN6	ANK2	8	1	1.75	1.20501	1.01713	1.09721	0.819143	0.858707	1.06466	1.23196	1.12204	0.867166	1.08439	1.34616	1.05887	0.791296	1.18279	0.943545	0.900806	1.0656	0.801823	1.40423	0.90241	0.924573	0.867305	1.34113	0.794699	0.753341	1.05673	0.908195	0.627532	0.771387	0.527966	0.479275	0.266825	0.291233
A0A0U1RQP1	DNM1	8	1	0.770989	1.15402	0.790415	0.762164	0.714333	1.19805	0.90416	0.833172	0.914276	0.949436	1.0362	0.921954	1.03332	0.932731	0.854638	0.767236	0.880471	0.98168	1.28818	1.13452	1.07918	1.05853	1.32038	1.175	1.09777	1.25172	1.27946	1.27463	1.49322	1.5955	1.24233	2.29446	1.85524	1.63083
A0A0U1RQS5	ERVK3-1	18	1	0.959371	1.21609	1.12879	0.812155	0.90284	1.1677	1.07072	0.975911	1.31814	1.20665	1.07542	0.912218	1.01763	1.04274	1.23632	0.889615	0.967059	1.08991	1.05721	1.04347	0.755665	0.855955	0.742011	0.964293	0.730424	0.838164	1.16133	1.04728	0.657018	0.598304	0.811737	0.836123	0.628641	0.588063
A0A0U1RQS6	TMEM275	13	1	0.600844	0.923419	0.963434	0.800145	0.921075	1.04136	1.01317	1.01543	1.0889	1.09963	0.934118	1.28276	0.929609	0.714768	0.859467	0.797046	1.1035	0.73762	0.932683	1.54681	1.7608	1.16789	0.971994	1.17822	1.17032	0.809416	0.956492	1.07557	0.838158	0.975611	0.943622	1.09476	2.75997	1.68608
A0A0U1RQU3	ATP2B1	21	1	1.17909	0.873833	1.00623	1.16537	0.912162	0.850743	1.13269	1.01697	0.84926	0.858841	1.11639	0.909037	1.00394	1.17506	1.06615	0.942691	1.02567	0.888403	1.1141	1.00133	1.06857	1.18923	1.19876	0.94162	1.06611	0.976883	1.32812	1.1683	1.43396	1.17021	1.41277	1.24516	1.69872	1.53935
A0A0U1RQW6	DIP2C	1	0.9926	0.595961	NA	NA	1.11785	0.920404	NA	NA	NA	NA	NA	NA	1.08964	NA	NA	NA	0.883354	NA	NA	NA	NA	1.12594	NA	NA	NA	0.94024	NA	NA	NA	NA	NA	NA	NA	1.37458	1.28115
A0A0U1RR70	DCLK2	235	1	1.44786	0.961779	0.881492	1.09073	0.997344	0.817477	0.878056	0.941188	0.999888	0.94964	0.897254	1.05532	1.12823	1.18089	1.0489	1.07101	1.21295	0.888702	0.939866	0.889481	0.969849	0.912378	1.01258	0.974548	0.924942	0.946713	0.969991	0.925313	1.15136	1.15838	1.18438	1.10941	1.07649	1.18296
A0A0U1RRE5	NBDY	13	1	0.548329	0.964158	0.891445	0.590297	0.740295	1.00313	0.802907	0.640206	0.820209	0.878767	0.99613	0.733769	1.22514	0.977938	0.908954	0.652825	0.944805	0.761471	1.00423	0.72103	0.902889	1.14516	0.727981	1.05285	0.781713	0.766653	0.932463	0.939795	0.744228	0.886545	1.01776	0.928872	0.691939	0.736093
A0A0U1RRF1	AGAP1	93	1	1.12149	1.07852	0.92001	0.950521	0.992567	1.01551	1.0516	1.01381	0.878213	0.889163	0.975182	1.02629	1.11614	0.989197	0.954459	0.907373	1.03106	0.913302	1.13792	1.09537	1.03921	0.867085	0.940059	0.973969	0.998454	1.02978	1.09035	0.977116	1.13411	1.14007	1.22529	1.15628	1.13056	1.04098
A0A0U1RRK4	LBHD2	6	1	0.719243	1.13164	1.05371	1.02991	1.30089	1.19096	1.10788	0.983369	1.02004	1.08106	1.01897	1.09091	1.07094	1.04839	1.36634	0.970225	0.928739	1.1274	1.17	1.33082	1.19826	1.15061	1.10606	1.17182	1.08892	1.47477	1.09583	1.01696	1.41719	1.33826	1.22862	1.07984	1.61533	1.17493
A0A0U1RRL7	MMP24OS	13	1	0.710426	1.17625	1.22831	0.847954	1.0436	0.976346	0.836145	1.19284	0.813895	1.03097	1.14771	1.15481	0.811475	0.903056	1.16712	0.932503	0.739938	1.63136	0.868423	1.24714	1.04055	1.84755	1.59152	1.49324	1.2584	1.0779	1.27775	0.782206	1.14676	1.03037	1.00638	1.09753	1.37843	0.618006
A0A0U1RRM2	SEPTIN7	4	0.9996	2.52366	1.17811	NA	0.965587	1.07089	1.01565	0.761933	1.02978	NA	NA	NA	0.859524	0.748896	1.23823	1.18998	1.17709	0.738602	NA	0.502807	0.580041	0.624125	NA	NA	0.77027	0.781878	0.712095	0.808326	0.528588	NA	0.696122	0.683309	NA	0.43592	0.703232
A0A140T913	HLA-A	36	1	0.900974	1.04862	0.87518	1.17261	1.07808	0.872387	1.30839	1.12739	1.26781	0.822303	0.918846	1.04306	1.10334	0.985509	0.950879	1.04823	0.952552	0.997746	0.997179	0.793696	0.969366	0.953235	0.931995	0.792683	1.11335	1.01425	1.00561	1.16506	0.899171	1.23978	0.919398	0.866702	1.26459	1.23438
A0A140T915	HLA-DPB1	8	1	0.940551	1.33152	0.322138	1.32911	0.33859	0.75111	0.532619	0.973127	0.28669	0.389119	0.451715	0.312214	0.386525	0.576079	0.75117	0.38111	5.2734	0.372045	0.414744	0.360085	1.62102	0.544361	0.421935	0.358607	0.298831	2.888	1.98791	1.9695	1.92452	1.01997	0.846948	0.501357	0.63062	1.24053
A0A140T9M0	HLA-C	29	1	1.38886	0.713206	0.931509	0.865451	0.738526	1.00032	1.03578	0.927684	0.772618	0.876545	0.980632	1.14154	1.15913	0.95015	0.816304	1.06471	1.07147	0.90828	0.820467	1.09755	1.13699	1.09989	1.08348	1.31118	1.08941	1.27121	0.994184	1.34175	1.42017	0.955667	0.798588	1.2349	1.24498	1.1059
A0A140T9S8	HLA-DQB1	9	1	0.776771	1.01304	0.896876	1.01186	1.18983	1.07164	1.01614	1.04281	0.905405	1.05843	1.01229	1.02086	1.04748	0.881201	0.860482	0.854541	1.10589	1.52598	1.441	1.77339	1.50341	1.59581	1.48399	1.43091	1.22032	1.17897	1.17283	1.73857	1.74365	1.02763	1.03044	0.883905	0.876983	1.06995
A0A182DWF4	HLA-DPB1	35	1	0.714431	0.904813	0.683763	0.872856	0.992566	0.959646	1.13337	0.807526	0.501123	0.702423	0.950133	1.37986	0.848203	0.811342	0.962305	0.919563	1.07076	1.20653	1.49569	1.11399	1.60043	2.03055	1.29144	1.61357	1.3046	1.06377	1.43112	1.34736	1.08758	1.1143	1.18423	1.24453	0.919606	1.00357
A0A1B0GTI3	FTO	2	0.9957	0.87997	NA	NA	0.809301	0.96287	NA	NA	NA	NA	NA	NA	1.05782	NA	NA	NA	0.979856	NA	NA	NA	NA	0.940005	NA	NA	NA	0.841436	NA	NA	NA	NA	NA	NA	NA	0.486934	0.5339
A0A1B0GTK8	TNFAIP8L3	60	1	1.6601	1.04925	0.986935	1.07652	0.882464	0.888556	0.941273	0.925467	1.04951	0.909698	0.798127	1.00183	1.87746	1.2604	0.869749	1.21849	1.25795	0.825188	0.932835	0.857489	1.04374	1.05909	0.687386	1.07624	1.11276	1.14615	0.954172	0.957528	0.869291	0.818379	1.05753	0.891555	0.983414	0.884798
A0A1B0GTL5	RAB11FIP5	190	1	0.975962	1.14548	1.11053	0.883565	0.923255	1.00873	0.982211	1.04021	1.13853	1.1389	1.08232	1.08809	1.01566	0.955611	1.09577	0.979367	0.979459	1.01818	1.05691	1.02162	0.87899	0.906755	0.92253	0.976021	0.908319	0.848133	1.09356	0.878052	1.06719	1.02932	1.01133	1.30024	1.02123	1.00176
A0A1B0GTU4	PXN	9	1	1.095	0.894579	1.17006	0.708344	1.24821	1.06154	0.929829	1.08624	1.01799	1.75462	1.32594	1.03734	1.73739	0.990058	0.829082	1.16746	1.01309	0.688069	2.10122	0.924188	1.22235	0.77862	0.799141	1.13055	1.15908	0.943631	2.28488	1.26337	1.07829	1.3216	3.04826	1.54409	1.19715	1.74802
A0A1B0GTW6	EPB41L1	604	1	1.19343	0.992708	0.936547	0.99366	0.894357	0.959993	0.935433	1.02852	1.08365	0.972734	0.959292	1.01271	1.04762	1.11382	1.02312	0.981583	0.971823	1.11818	0.99664	0.967214	1.01353	0.947156	0.979568	1.05318	0.984258	0.971603	1.06903	0.972793	1.0295	1.16323	1.09545	1.19805	1.11865	1.10439
A0A1B0GU45	IRAG2	11	0.9992	0.880532	0.902009	0.934097	1.01526	0.969292	0.948069	1.0152	1.16458	1.21445	1.17105	1.25904	1.00109	0.951693	0.728619	0.927735	0.873011	0.652175	1.37272	1.35302	1.19977	1.15995	1.57541	1.53101	1.14895	1.1339	0.553861	1.04115	0.704187	1.44512	0.448683	1.26495	1.20499	1.31454	1.09407
A0A1B0GU97	NFIB	15	1	0.829753	0.918833	0.727648	1.15292	1.17516	1.34694	0.831694	1.06602	1.29331	1.02784	1.19722	1.1445	0.9037	0.898592	1.11306	0.741337	1.12034	0.813372	0.999211	0.904167	0.982318	1.04935	1.2252	0.928626	1.10803	0.8859	1.38875	0.757772	0.998479	0.94612	1.14644	1.06255	0.941308	1.02781
A0A1B0GUA3	KIFBP	65	1	1.26379	1.00015	0.994691	1.07852	1.08099	0.991462	0.932826	1.02226	0.895794	0.944292	0.933531	0.902108	0.955959	1.06307	0.971803	1.19361	0.911693	1.17138	1.06411	0.960102	1.0219	0.938606	0.949499	0.951396	1.12611	0.975557	0.972579	1.00878	0.95675	1.17483	1.2297	0.988778	1.0399	0.984409
A0A1B0GUA4	ASAH1	359	1	0.720643	0.876487	0.87954	1.05393	1.04572	0.929964	1.28161	0.929517	1.11655	0.86847	0.879137	1.21254	1.01347	0.888445	0.951978	1.00664	1.16544	1.21544	0.900593	1.25794	1.01117	1.22587	1.17367	1.22778	1.15038	1.17852	1.055	1.47278	0.63391	0.853724	0.482629	0.674166	0.582047	0.678374
A0A1B0GUD6	GRAMD1B	49	1	1.23874	0.873611	0.905861	0.99734	1.08017	0.924487	0.926663	0.888359	0.944024	0.984149	0.971919	0.979563	1.21183	1.03499	0.97746	1.13202	1.08644	1.12469	1.15412	0.944086	1.12182	1.13586	1.13388	1.06875	0.937599	1.04728	1.03635	1.09238	1.28181	0.990712	1.15812	1.08075	0.974596	1.14541
A0A1B0GUE0	JAKMIP1	4	1	1.13995	0.859837	NA	1.05177	1.12632	0.944195	NA	NA	NA	NA	NA	0.770828	0.844495	NA	NA	1.16053	NA	NA	0.970961	0.880314	1.15972	NA	NA	0.903916	1.15817	NA	1.01569	NA	NA	NA	1.40152	NA	1.11524	1.10306
A0A1B0GUI7	BRD3OS	19	1	0.984542	0.985863	0.835022	0.986129	0.864312	1.0677	0.763566	0.946633	1.19695	1.36749	1.09311	1.02774	1.22383	0.962339	0.978085	0.846348	0.931005	1.08193	1.24999	1.53013	1.10527	1.07189	1.09582	1.33299	1.21444	0.9064	1.21215	1.20519	1.6414	1.36096	1.5326	1.8023	1.51926	1.47682
A0A1B0GUS4	UBE2L5	9	0.999	0.774731	0.634395	0.747817	0.76996	0.826429	1.08273	0.903115	0.961402	0.764584	0.98344	0.937866	0.588179	1.14317	0.867157	0.989213	1.26663	1.20153	1.36967	1.75406	1.16611	1.78107	1.33499	1.36544	1.00961	2.1374	1.75871	1.4523	1.47612	1.36547	1.51362	1.17749	1.31773	1.3321	1.80415
A0A1B0GUS7	UNC13B	17	0.997	0.67778	0.827041	0.88352	0.90205	0.982739	1.052	1.03402	1.01579	0.981295	0.921677	0.891708	0.870885	0.930565	0.938636	0.966577	0.94603	1.11784	1.13363	1.25942	1.26888	1.32013	1.16285	1.19589	1.03609	1.17733	1.02071	0.921463	1.23874	1.26851	1.44346	1.7141	1.48749	1.49115	1.2253
A0A1B0GUT6	PSD	7	1	1.59489	0.959319	0.880438	1.24721	1.07135	0.940988	0.95771	0.855912	0.970628	1.06679	1.06711	1.30222	0.974361	0.980616	1.2645	1.04781	1.13444	0.844278	0.984559	0.944972	1.04025	0.998643	1.06501	0.897268	0.960686	0.960369	0.89626	0.814127	1.40647	1.22324	1.24184	1.37981	1.56358	1.50706
A0A1B0GUW7	SMIM27	1	0.9964	NA	NA	1.25489	NA	NA	NA	NA	NA	1.13909	1.17993	1.00054	NA	NA	NA	NA	NA	NA	1.06872	NA	NA	NA	1.30537	0.930275	NA	NA	NA	NA	NA	1.00949	NA	NA	1.71242	NA	NA
A0A1B0GV05	RAP1GAP2	257	1	1.27113	1.10031	1.05458	1.03456	1.06089	0.951829	0.890069	0.908774	0.930513	0.91602	0.982751	1.1156	1.1769	1.09175	1.07708	1.00043	0.989138	0.833068	0.917977	0.933768	0.975552	0.921562	0.911578	0.956357	0.92575	0.93372	0.891653	0.885731	0.954931	0.966699	0.956124	0.975735	0.905133	0.958337
A0A1B0GV12	GOLGA8N	15	0.9998	1.31906	1.17721	1.01409	1.11119	0.783994	0.903622	0.947504	1.24118	0.829593	0.869838	0.800652	1.09708	1.45955	1.04181	0.885919	1.45278	0.980776	0.699718	0.851447	0.87701	0.996553	0.95329	0.969317	1.00797	0.993343	1.08498	0.954387	0.819031	0.853991	1.01321	1.05247	0.795928	0.788975	0.75088
A0A1B0GV38	GABRA1	129	1	0.857328	0.826854	0.827629	0.931699	0.949417	0.958423	1.00954	1.04559	1.283	1.18465	1.17823	1.02984	0.862624	1.05757	1.33547	0.778353	0.858137	1.20387	1.15449	1.42576	1.04737	0.905649	1.07034	1.25536	0.804791	0.710896	1.23784	1.16296	1.24	1.61684	1.35177	1.81603	1.61498	1.402
A0A1B0GV45	MYO18A	9	1	0.736956	0.720974	1.08774	1.40906	0.830524	0.844453	NA	1.23273	1.26289	1.09472	1.12526	0.53581	0.692029	1.29838	0.835513	0.621466	3.98971	1.29012	1.17658	1.33687	NA	1.3145	1.20864	0.807013	0.623011	1.6006	1.0166	NA	1.45383	3.28746	1.32713	1.40296	NA	1.13082
A0A1B0GV47	KIF21A	12	1	1.10734	0.909205	0.771048	1.03215	1.01465	0.9434	0.88513	0.907601	0.841924	0.736938	0.872778	1.08459	0.922999	0.941102	1.13807	0.92745	1.12571	1.00562	0.898146	0.846755	1.45274	0.837256	1.10912	0.824318	1.32112	1.15528	0.851414	0.970314	0.954665	1.24878	0.766662	1.13593	1.5751	1.27512
A0A1B0GV68	FARP1	28	1	0.908409	0.958642	0.956859	0.857133	0.911353	1.03221	1.21351	1.04758	0.9874	1.03194	1.08506	0.92769	1.24496	1.09894	1.30457	0.863711	0.970193	1.06467	1.1446	1.24395	1.08097	1.18751	1.18589	1.22587	0.960611	0.813975	0.977452	0.987094	1.14064	0.982409	1.11203	1.17767	0.906623	0.89922
A0A1B0GVD0	AMT	9	0.9989	1.23125	0.977465	1.07979	1.00414	1.05167	0.790934	NA	NA	1.18028	1.12104	1.16883	0.978071	1.15555	NA	NA	1.41747	NA	0.665458	0.613874	0.639639	1.04216	1.08247	0.984453	0.903666	1.18945	NA	0.94326	NA	0.778319	NA	0.46745	0.947829	0.687734	0.978657
A0A1B0GVF1		14	0.9986	0.658258	0.711407	0.751972	0.930136	1.03496	0.833364	1.14505	0.880739	1.29773	1.14709	1.07141	1.52265	0.819824	1.50146	1.2266	1.03209	1.50137	1.0309	0.7673	1.89821	1.55418	2.0538	1.55818	1.51677	1.5487	1.21522	0.885644	2.14121	0.663819	0.814162	0.54136	0.676043	0.668901	0.592477
A0A1B0GVI3	KRT10	545	1	0.512006	0.851588	1.65006	0.992059	1.64454	0.790741	1.25689	1.06682	1.03498	0.835541	0.741444	0.804005	0.606974	0.935559	0.803847	0.838461	1.55547	1.18527	1.04303	3.4013	2.69105	2.04841	0.974183	2.05742	1.28935	0.792585	0.736384	2.68165	2.92905	1.79982	1.57544	3.89292	3.10812	1.1058
A0A1B0GW05	DPY19L1	32	1	0.740058	0.719865	0.951409	0.931641	0.781981	0.980103	0.984269	0.941141	0.847875	1.09669	1.14706	0.83347	0.896431	0.986164	0.93292	0.956902	1.03798	1.49683	1.1874	1.26808	1.3826	1.47491	1.53091	1.15409	1.07247	0.908278	1.02721	1.47677	1.46309	1.7652	1.86606	2.21301	2.06792	1.4681
A0A1B0GW23	ABHD14A-ACY1	12	1	0.955214	0.986104	0.980179	0.819374	1.11407	1.01696	0.995949	0.95267	1.0043	0.980513	1.0838	0.880632	0.802429	0.893434	1.02965	0.87521	1.09944	1.31814	1.07309	1.26297	1.07883	1.04522	1.08286	0.940591	1.01329	1.06533	0.848793	1.03479	1.04984	0.98401	0.863961	1.28358	1.00709	0.944499
A0A1B0GW41	ING5	5	1	0.933659	0.65652	0.652161	1.00654	1.60966	1.07153	NA	NA	0.712475	1.0042	0.985723	0.937087	0.431374	NA	NA	0.905734	NA	0.605465	0.845537	0.800201	1.12015	1.20352	0.75209	0.334675	1.24739	NA	0.775092	NA	0.936303	NA	0.498776	0.51298	1.38843	1.22124
A0A1B0GWK2	KAZN	49	1	1.1319	1.09741	1.05729	0.921791	1.08258	0.970038	0.953787	1.02376	0.884322	1.04613	0.979389	1.06944	0.934512	0.936594	1.1439	0.959986	0.944607	1.14427	1.09279	0.936551	1.03548	0.967913	0.908628	0.926512	0.956022	1.04338	0.948972	0.906204	0.985429	1.2058	1.0229	1.08737	0.865015	1.1946
A0A1B0GX26	PTPRN	10	1	0.725908	1.25174	0.911491	0.713873	0.620598	1.40699	0.956613	1.05344	1.11672	0.79678	1.13382	1.19338	1.25917	1.02963	1.10236	0.700703	1.05871	0.662773	1.50163	0.979667	0.716916	0.961724	0.74043	1.00222	0.693291	1.0297	1.13842	0.816054	0.761311	0.817813	0.886942	0.661033	0.539793	0.516451
A0A1B0GXG3	NCALD	5	0.9994	NA	1.23847	0.836004	NA	NA	1.47853	1.1871	0.88757	0.611526	0.946388	0.969598	NA	0.818714	0.893623	0.824968	NA	0.905714	1.07371	0.566445	1.61475	NA	0.522726	1.04395	0.701209	NA	0.567737	1.19435	1.08456	0.763703	NA	1.10762	0.693577	NA	NA
A0A1C7CYX1	MIDEAS	17	1	0.699784	0.597119	0.780152	0.991937	1.1384	0.822557	0.880367	0.929706	0.966573	0.900629	0.925112	0.999554	0.777354	0.628123	0.767037	0.974442	1.15274	1.45879	0.968526	1.10846	1.18666	0.917894	1.31724	0.86136	1.14214	1.02476	0.709403	1.01967	1.09106	1.0926	1.11766	1.35968	1.67992	1.27355
A0A1C7CYX9	DPYSL2	1040	1	1.68615	1.21665	1.19302	1.07438	1.17617	1.12906	0.865571	0.98141	1.0277	0.858262	1.04379	0.948273	1.06699	1.10778	1.03273	1.22278	0.91711	0.788366	0.737376	0.544843	0.5784	0.641666	0.53051	0.67579	0.737211	0.822171	0.760489	0.59989	0.694838	0.755424	0.662756	0.680621	0.68764	0.705722
A0A1W2PP11		7	0.9999	1.34945	1.01878	NA	0.970237	1.10947	1.20554	0.992992	0.947137	NA	NA	NA	0.821798	0.996325	1.08067	1.085	1.05316	0.865479	NA	1.25277	0.924641	0.989939	NA	NA	1.09941	1.21548	0.94196	0.857216	0.94268	NA	0.902318	0.980415	NA	0.877482	0.891524
A0A1W2PPS1	HNRNPU	15	1	1.39966	1.22953	0.958041	0.782358	1.25449	1.03817	0.807339	0.816286	1.07333	1.1235	1.08083	1.10162	0.858293	1.37076	1.243	1.1645	1.09906	0.897705	1.07502	0.743269	0.198466	0.501305	0.421205	0.968314	0.374751	1.0306	1.24683	0.867093	0.594525	0.857802	0.997968	0.81009	0.38753	0.677579
A0A1W2PQ11	CNTN2	290	1	1.09087	1.06585	1.15847	1.07491	1.26249	1.09355	1.16741	0.81081	0.945435	1.00091	1.03517	0.88429	0.845673	1.04445	1.1132	1.06821	0.807055	1.1933	1.23556	0.83657	0.849112	0.831641	0.944177	0.820066	0.824824	0.940529	0.882317	0.773823	0.846855	1.02446	0.801561	0.93988	0.97437	0.893438
A0A1W2PQ25	GFAP	16	0.9985	0.973929	0.650233	0.576177	0.866082	0.679464	0.837968	0.800934	1.36211	0.683978	0.898505	0.997082	1.00159	0.700659	0.792003	0.716147	0.809665	1.25795	0.946507	1.15808	1.79927	2.11741	2.07507	1.77357	1.45503	3.60512	1.44509	1.32226	1.53137	2.01674	1.70262	2.98951	1.44393	1.63868	1.678
A0A1W2PQM3	GOSR2	40	1	0.812804	1.01602	1.03658	0.890088	0.894978	1.15465	0.920912	0.885028	1.06367	1.23358	1.06596	0.991312	1.20117	0.913712	0.79567	0.757791	0.942824	0.94367	1.2341	1.14374	0.99264	1.15317	1.18425	1.04767	1.17469	0.984832	1.21157	1.07039	1.19276	1.30834	1.03464	0.975825	0.897903	0.910731
A0A1W2PQX5	CCDC187	8	0.9948	0.635158	0.952	0.775735	0.891627	1.00325	1.18001	1.44997	0.935463	0.684162	0.850669	0.884695	0.691001	0.946904	1.08119	1.26851	0.595174	1.07843	1.21703	1.36257	1.39014	1.44802	1.39696	1.12586	1.37517	1.21207	1.3704	1.56772	1.50781	1.34299	1.25086	1.48821	0.904218	1.27962	1.06374
A0A1W2PR49	GABRG2	67	1	0.950656	0.894235	0.818207	0.746714	0.810652	1.00247	0.905605	0.893294	1.30586	1.15449	1.31721	1.02076	0.958103	1.22667	1.38455	0.684638	0.867966	1.08248	1.44054	1.2748	1.12055	0.99428	1.23159	1.27674	0.781323	0.793874	1.4981	1.2887	1.39361	1.68334	1.55526	1.97098	1.75885	1.79422
A0A1W2PR95	IGBP1C	4	1	0.612824	NA	1.03231	0.908202	0.942974	NA	1.31515	1.16448	0.718044	0.945839	0.894864	0.791328	NA	0.945711	1.13301	0.819217	1.00373	1.15068	NA	NA	1.35618	1.40032	1.60042	NA	1.41017	1.17117	NA	1.45104	1.34217	1.56118	NA	1.34122	1.25784	1.01304
A0A1W2PRX6	KCNMA1	25	1	0.969412	0.955312	1.09392	0.975712	1.08016	1.30512	0.76761	0.802656	1.20066	0.970483	1.20817	1.02202	0.895062	0.809697	1.14214	1.07459	0.904864	0.968697	0.976307	0.881265	1.17797	0.786977	0.772288	0.746647	0.997703	0.699051	0.835332	0.660778	0.955933	0.914413	0.728605	1.14051	1.00712	1.11499
A0A1X7SBR3	GFAP	8	0.9996	1.10881	1.00126	NA	0.945694	1.01871	1.04686	0.820812	0.840147	NA	NA	NA	0.936715	0.890272	0.577747	0.492643	1.17995	0.785799	NA	1.14077	1.38059	1.49753	NA	NA	1.09395	2.52699	1.43254	1.00634	0.955243	NA	1.32388	1.59296	NA	1.64315	1.62587
A0A286YEU2	RBFOX1	101	1	0.865418	0.971388	0.944547	0.869529	0.891181	0.986664	0.89009	0.864138	1.36348	1.09018	1.09943	1.16556	0.945431	1.12814	1.10918	0.887073	1.09815	1.10388	0.999756	0.788878	0.773319	0.845996	0.881271	0.966427	0.827148	0.850641	1.16604	0.701925	0.875423	0.855851	0.97041	1.05474	1.032	0.995031
A0A286YEX4	NFIC	20	1	0.904332	0.936633	1.01658	1.19742	1.26888	1.46974	0.981615	1.05252	1.19349	1.11365	1.1326	0.958385	0.810152	0.725092	1.05636	0.949348	0.992135	0.940817	0.803408	1.02227	1.10981	0.855341	1.05742	0.947491	1.10995	0.965753	0.946536	0.895558	1.00234	1.12876	1.18539	1.16609	1.20436	1.19408
A0A286YFE1	PHGDH	3	0.9999	0.975688	0.940834	1.09694	0.987495	1.05964	0.920942	NA	NA	1.06044	0.906774	1.04742	0.930992	1.0267	NA	NA	0.791665	NA	0.914979	1.16478	1.08043	1.04913	1.33973	1.18853	1.27118	1.28721	NA	0.900542	NA	1.37169	NA	1.11172	1.41824	1.03881	1.15695
A0A286YFJ4	MAPK10	135	1	1.65669	1.17921	1.08066	1.15824	0.968696	0.911512	0.972925	0.983365	0.960935	0.898069	0.88957	0.940527	0.946194	1.29308	1.11372	1.30475	0.885409	0.81896	0.756822	0.778012	0.84701	0.741571	0.707326	0.838445	0.85019	0.920675	0.877273	0.810147	0.78157	0.940741	0.906641	0.931772	0.844313	0.858741
A0A286YFL8	PPT1	116	1	0.761626	0.964109	0.899556	0.89678	0.988209	1.08043	1.2265	0.988559	1.17569	1.06344	0.920492	1.34921	1.08988	0.972285	0.982306	0.989497	1.09453	1.02141	0.847863	1.29475	0.894638	1.05979	1.04568	1.22013	1.07982	1.06906	0.974547	1.01274	0.810238	0.866375	0.498956	0.727918	0.666593	0.625785
A0A2R8Y3M9		19	1	0.683394	1.23867	0.981125	0.864051	1.07693	1.21832	0.991959	0.920423	0.928611	1.02101	0.987118	0.953558	0.861822	0.883494	1.11343	0.8613	1.1171	1.09702	1.32131	1.03454	0.830634	1.17455	1.10132	1.00984	0.994188	1.19724	1.13216	1.39629	1.0938	0.99701	1.1549	0.925742	0.984225	0.965574
A0A2R8Y425	CHD4	88	1	0.865676	0.969852	0.903672	0.993111	1.07901	1.11455	1	0.974549	0.953589	0.945534	0.988376	1.00009	0.829566	0.849182	1.10934	0.893448	1.17366	1.18403	1.16466	1.20662	1.04351	1.05473	1.19875	1.00873	1.11436	1.20996	1.0948	1.00481	1.18822	1.18082	1.26765	1.05488	1.26307	1.16313
A0A2R8Y4D1	SLC1A2	8	1	1.01512	0.845913	1.22704	0.956763	0.782147	0.557381	1.11113	0.962915	1.08228	1.19641	0.894094	0.793732	0.943975	1.25371	0.952999	0.887535	1.29103	0.969952	1.21202	1.67714	1.18651	1.22303	1.05937	1.6604	0.823562	0.88393	0.93214	1.39406	1.14619	1.31628	1.17073	1.7541	1.78227	1.22035
A0A2R8Y4H2	SEPTIN3	278	1	1.63918	1.28631	1.30794	1.01614	1.12421	1.10536	1.01083	1.06021	1.04923	0.895421	1.03771	1.00088	1.06243	1.14317	1.07654	1.20037	0.827112	0.747301	0.586832	0.6561	0.676193	0.79557	0.629299	0.844493	0.961723	0.773404	0.830175	0.727933	0.748729	0.824237	0.635798	0.701518	0.639183	0.685175
A0A2R8Y4I8	SPAST	116	1	1.1576	0.956235	1.05413	0.998907	1.01073	0.905233	1.04046	0.886208	0.870878	0.946673	0.897948	0.925943	0.951584	1.07123	0.987284	1.20693	1.06924	1.16684	0.888629	0.946619	0.96716	0.88803	0.833786	1.02587	1.0046	1.00587	1.0331	0.98166	0.998909	1.08332	1.05846	0.912132	1.0804	1.04111
A0A2R8Y4Z8	CCDC9	67	1	0.907607	0.889926	1.10371	0.94758	1.04846	0.984284	1.06336	0.989551	1.11997	1.06189	1.13707	1.05194	0.881621	0.898249	1.05626	0.946809	0.928497	1.0807	1.16429	1.25672	1.17773	1.0956	1.05644	1.03248	0.999001	1.03495	0.9694	1.11743	1.17661	1.10113	1.12736	1.0275	1.07109	1.12625
A0A2R8Y507	PRKG1	6	1	1.12738	1.14691	0.95437	0.87888	0.970565	1.03684	1.07911	1.03353	0.799475	0.670032	0.810772	1.17331	1.08288	0.961937	0.910535	1.25788	0.98749	0.646782	0.897797	0.843525	1.08185	1.13802	0.740591	1.16934	1.22643	1.11182	1.12983	0.955947	0.71516	1.04687	1.31802	0.696161	1.17529	1.28998
A0A2R8Y566	RELCH	220	1	1.47167	1.1598	0.999281	0.952227	0.986	0.968197	0.99834	0.994713	0.872467	0.907146	0.970875	1.02291	1.06468	1.06224	1.11084	0.960398	0.995269	0.930349	1.02699	0.894115	0.909491	0.9478	0.95801	0.936348	0.861135	1.02211	1.05823	0.962093	0.940147	1.00087	1.05708	0.937033	0.880401	1.01355
A0A2R8Y5J6	SGCE	13	1	0.982934	1.06204	0.951175	0.914411	1.0749	0.989164	0.984167	1.1499	1.08188	1.05018	0.969096	1.05696	1.08107	1.06396	1.09862	1.0005	1.04792	0.909281	1.10512	0.942189	0.93038	0.988855	0.928177	0.983865	0.861774	0.897272	1.21204	1.04351	0.809887	1.08391	0.777966	0.923307	1.15802	0.972742
A0A2R8Y619	H2BK1	10	0.9919	0.293602	0.634529	0.665695	0.737413	0.776656	1.03325	1.24687	0.935203	1.61303	1.19902	1.33835	1.30299	0.722931	1.18194	0.837849	0.729327	1.3298	1.07898	1.15168	1.48166	1.44194	1.56	1.77608	1.37515	1.68369	1.1775	1.22041	1.18394	1.69954	1.66314	0.840548	1.94627	2.33773	1.68892
A0A2R8Y623	RPS7	7	1	1.16238	0.981308	0.878491	1.11274	1.16484	1.15804	1.18653	1.17718	0.58686	0.739699	0.690915	1.01774	0.944213	0.83788	1.21872	1.03342	1.59161	0.697986	1.52934	0.940306	0.774489	1.14615	0.863735	0.930178	1.23294	1.79883	1.12907	1.19542	0.790904	0.979632	1.08961	0.742952	0.748294	0.781692
A0A2R8Y6P1	CRACD	55	1	1.12731	1.10469	1.15417	0.90208	1.00968	0.838207	1.03258	0.975721	0.858232	0.862956	1.099	1.1626	1.2208	0.915477	1.27219	0.96225	1.05447	0.728146	1.04544	0.92878	1.03656	0.984359	0.859413	0.915341	0.887754	1.1384	1.08547	1.00791	0.800427	0.9058	0.936209	0.98496	1.11262	1.12458
A0A2R8Y739	POU3F4	2	1	0.84351	NA	NA	1.03334	1.20444	NA	1.23958	1.18089	NA	NA	NA	0.818928	NA	1.04713	0.893872	1.04225	1.08925	NA	NA	NA	1.19703	NA	NA	NA	0.988895	1.2381	NA	1.20955	NA	1.2411	NA	NA	0.992821	1.15826
A0A2R8Y793	ACTB	484	1	1.29889	1.19684	1.0834	1.15873	1.09283	1.0242	1.00528	1.06521	1.04369	0.895956	0.97145	1.09268	1.17982	1.2141	1.04827	1.09032	0.967407	0.57198	0.772214	0.572876	0.687086	0.763011	0.564976	0.900306	0.679727	0.9346	0.861113	0.805437	0.687915	0.695785	0.644435	0.594466	0.717566	0.630449
A0A2R8Y7R9	PPFIA1	68	1	0.962726	0.926568	0.941904	0.96531	0.949339	1.05598	1.01148	0.987951	0.894192	1.09416	1.14085	0.931387	0.977024	0.910141	0.981112	0.917274	0.880635	1.17896	1.26412	1.20197	1.04169	1.20502	1.16507	1.16448	1.13248	1.11278	1.10867	1.14261	1.357	1.2236	1.54892	1.39753	1.29586	1.45572
A0A2R8Y851	RPS29	33	1	0.697314	1.00302	0.67363	1.19573	0.689867	0.954128	0.98287	1.00675	1.73952	1.54929	1.14486	1.28652	1.35828	1.33082	0.932331	0.822561	1.39575	0.920555	1.22736	0.998986	0.935326	0.968368	1.17701	1.08517	0.851662	1.039	1.08687	1.08549	1.12882	1.16106	0.907962	1.26294	1.05849	1.14829
A0A2R8Y870	KIFC2	11	1	0.943292	0.768801	0.881001	1.0538	1.03603	0.840586	0.905602	1.00196	0.993204	0.988059	0.99463	0.937046	0.928456	0.865195	0.767247	1.05367	0.860875	1.10017	1.12116	1.12898	1.09077	1.24766	1.22845	1.23022	1.13407	0.974398	1.08823	1.1848	1.20186	1.21304	1.21239	1.56248	1.10575	1.02358
A0A2R8Y8A2	RGS6	14	1	0.916508	0.773329	0.90792	0.632904	0.606744	0.995612	0.899128	0.889696	1.12142	1.03939	0.720288	0.54099	0.915045	1.12348	0.998667	0.720019	0.923199	0.907562	0.773504	0.96077	0.801076	1.07749	0.92691	1.03903	0.665828	0.926935	1.01396	0.914861	0.862301	1.11546	0.998618	1.13623	1.27817	0.886796
A0A2R8YDQ9	SUCLA2	233	1	1.72009	0.907127	1.08676	1.04723	0.931813	0.877959	0.959019	1.10756	1.03381	0.950418	0.85083	0.851656	0.966825	1.41436	0.977583	1.5221	0.77805	1.17851	0.786835	0.719069	0.795693	0.794085	0.737491	0.859195	0.895311	0.790113	0.910888	0.735127	0.90347	1.16163	1.299	1.14864	0.992504	1.05665
A0A2R8YEE0	RIPOR2	8	0.998	0.793633	0.838004	0.8105	1.00404	1.1023	1.00873	1.04841	0.813464	0.931687	1.14308	1.02275	1.02751	0.933875	0.893619	0.923602	0.943116	1.0263	1.23185	1.25633	1.40211	1.59246	1.17539	1.3601	1.02042	1.48616	0.928922	1.12974	1.13111	1.63836	1.41799	1.42954	1.29506	1.50613	1.16504
A0A2R8YEM5	ENO1	5	1	NA	1.01336	1.23944	NA	NA	1.11291	NA	NA	0.766617	1.06141	1.48048	NA	0.815001	NA	NA	NA	NA	1.34797	1.0881	0.987108	NA	1.60911	1.29101	0.799455	NA	NA	1.37517	NA	1.75441	NA	1.30749	2.38461	NA	NA
A0A2R8YF87	VPS33A	88	1	1.19682	0.973326	0.897354	1.02946	0.940979	0.922126	0.944028	0.990039	1.0888	1.04635	0.922471	0.943441	0.954839	1.02912	0.92789	1.03674	1.09007	1.13264	1.12984	1.03551	0.91227	0.958808	0.88098	1.0313	1.05051	0.941029	1.0417	1.03365	0.999293	1.13435	1.20166	1.32745	1.26208	1.12383
A0A2R8YFN5	CASK	206	1	1.4073	0.987822	1.00587	1.14435	0.941959	0.972331	0.879112	0.933538	0.911976	0.896313	1.00328	1.05885	0.952947	0.965286	0.969949	1.0764	1.18063	1.0029	0.959725	0.965971	0.959017	1.01887	1.08047	0.89478	0.983274	1.15674	1.04271	0.971152	1.01298	1.12114	1.14851	1.19666	1.05045	1.11571
A0A2R8YG42	ARHGEF7	205	1	1.43512	0.985268	0.987665	0.937809	0.95603	0.885532	0.955779	0.921812	1.05934	0.998712	0.916021	0.976288	1.02896	1.1402	1.01673	1.10197	0.978832	0.982515	1.04782	0.996092	0.895104	0.907785	0.926567	1.03561	0.874286	0.971949	1.05014	0.938845	0.904511	1.0277	0.994225	0.969025	0.992662	0.978298
A0A2R8YGF8	ACTB	13	1	0.891178	0.926043	1.22596	1.01944	0.993289	0.990681	1.03173	1.15064	0.897887	1.0034	1.08083	1.00527	0.926864	0.990729	1.15269	0.941667	1.04012	0.874822	0.988196	0.858346	1.02897	1.06953	0.978098	1.0619	0.924167	1.06608	1.02032	1.35285	1.04611	1.05585	0.964383	0.784575	0.977099	1.1548
A0A2R8YGG3	SMARCA4	6	1	0.685319	1.03014	NA	0.930137	1.04607	1.35277	1.3715	1.05313	NA	NA	NA	1.00378	1.55753	1.07263	0.969731	0.773219	1.02497	NA	2.33391	NA	1.24815	NA	NA	1.1567	0.857613	1.14846	1.60721	1.30694	NA	1.27157	0.690537	NA	1.24953	1.09635
A0A2R8YHD2	TPM4	8	1	NA	0.924909	0.88563	NA	NA	1.20384	1.02791	1.34308	0.801389	0.822372	0.808472	NA	0.927243	0.648062	0.856413	NA	1.1999	0.974566	1.29532	1.19013	NA	1.42078	1.10225	1.08512	NA	0.90316	1.3966	1.48857	1.07126	1.10701	1.63114	1.06283	NA	NA
A0A2U3TZH1	SPG7	84	1	1.14017	0.952617	1.07018	1.09614	0.989971	0.985779	1.08583	1.05536	0.908347	0.989149	1.05601	1.00635	0.948785	0.982484	1.05552	1.04348	0.97234	0.955284	1.01437	1.02941	1.0973	1.01111	1.0676	0.915451	1.05453	0.913163	0.979499	0.961818	1.29161	1.09523	1.14164	1.04269	1.21951	1.09958
A0A2U3TZI3	ATP2B2	6	1	1.48975	0.853041	1.18994	1.12351	1.09625	0.805072	0.681003	0.72913	0.954816	1.00762	1.07159	1.30485	0.73232	1.02665	0.95807	1.09007	0.945688	1.51883	1.06312	0.838811	0.859031	0.85631	0.804244	0.865517	0.901632	0.733456	1.24532	0.631532	1.05204	1.07869	1.23499	1.84877	2.74868	1.94689
A0A2U3TZL5	CD59	23	0.9999	0.852511	1.12059	1.05795	0.866911	0.796539	0.946384	0.98053	1.06567	1.15949	1.35889	0.979057	1.28823	1.2283	0.901976	0.983392	0.860844	1.01042	1.02132	1.20997	1.17089	0.826219	0.929584	0.919788	1.28701	0.938171	0.81602	1.17577	1.17918	0.782343	0.558414	1.23704	0.987305	0.794089	0.70382
A0A2U3TZT9	ABHD5	1	0.9996	NA	1.05491	NA	NA	NA	0.779903	NA	NA	NA	NA	NA	NA	2.22218	NA	NA	NA	NA	NA	3.97386	0.968766	NA	NA	NA	0.780667	NA	NA	1.46657	NA	NA	NA	2.25123	NA	NA	NA
A0A2U3TZV8	PLCH1	6	0.9944	1.43626	0.815994	1.07712	0.871475	1.04419	0.815887	1.02736	1.01413	0.653723	0.760871	0.765889	0.785817	0.774362	0.978226	0.92242	1.09141	1.04204	0.960755	0.937879	0.884227	1.00548	1.07017	0.910419	0.961718	1.27554	1.05086	1.05755	1.06533	1.05545	1.5717	1.13193	0.927712	1.06051	1.18029
A0A2U3U043	KCTD1	35	1	0.913568	1.01123	1.0902	0.923966	1.04983	1.08449	1.09984	0.914336	1.14759	1.06147	1.03046	1.0658	0.991519	1.04603	1.12676	0.905721	0.995522	0.998131	0.854422	0.927692	0.883618	0.885669	0.854085	1.04323	0.966947	0.840816	0.927334	0.929393	0.656351	0.994782	0.744025	0.712409	0.762517	0.779119
A0A3B3IRU2	SNU13	9	0.9995	0.672572	0.894106	0.994124	0.805325	0.866471	0.911796	0.860936	0.999466	1.76905	1.88705	1.05842	1.04318	1.16672	1.17471	0.886391	0.866989	1.52342	0.750354	0.749438	0.840727	0.701978	0.744626	0.733059	1.16573	0.903812	1.00463	1.06427	1.0337	0.543428	0.543825	0.389916	0.621268	0.592432	0.673484
A0A3B3IRW8	SORBS1	456	1	0.943354	1.0182	0.977507	0.886856	0.954386	1.05649	1.04688	1.07887	1.04928	1.0728	1.04815	1.03838	1.01393	0.964475	1.0612	0.91132	0.959856	1.06682	1.04007	1.05983	1.02029	1.01649	0.973185	1.04558	1.08016	0.944931	1.0343	0.929826	1.05829	1.00126	1.05893	1.02274	1.0079	1.11594
A0A3B3IRY8	EPHB1	1	0.9936	0.887702	NA	NA	0.963469	1.57311	NA	NA	NA	NA	NA	NA	1.35779	NA	NA	NA	1.10868	NA	NA	NA	NA	1.83212	NA	NA	NA	1.45213	NA	NA	NA	NA	NA	NA	NA	1.98248	1.60669
A0A3B3IRZ4	IQSEC1	198	1	1.19565	1.03535	0.897652	1.02521	1.07866	0.902394	0.920362	0.909427	1.02416	0.964316	1.06688	0.986517	0.973015	1.00636	1.10187	0.910333	1.06576	1.07513	0.99243	0.931817	0.945429	0.895087	0.981536	0.97491	0.883422	0.918003	1.01059	0.820019	0.945109	1.04637	1.18577	1.11446	1.13892	1.06831
A0A3B3ISF6	KLHDC7B	4	0.9966	NA	1.01013	0.881766	NA	NA	1.3669	1.28934	1.26808	0.72602	1.08476	0.879143	NA	0.723339	1.03286	1.09383	NA	1.42805	1.13547	1.47006	2.09017	NA	1.46981	1.40073	1.57687	NA	1.54634	1.26517	1.39075	1.19635	1.52524	1.73427	1.00216	NA	NA
A0A3B3ISF7	ZDBF2	1	0.9967	NA	NA	NA	NA	NA	NA	1.4772	1.14761	NA	NA	NA	NA	NA	1.03455	1.29267	NA	0.855229	NA	NA	NA	NA	NA	NA	NA	NA	1.09405	NA	1.35287	NA	1.16308	NA	NA	NA	NA
A0A3B3ISJ8	CLIP1	4	0.9926	1.2312	0.647992	NA	1.3111	1.04757	1.0765	NA	NA	NA	NA	NA	1.19582	0.73518	NA	NA	0.977226	NA	NA	0.290423	1.39184	0.86889	NA	NA	2.0996	1.02516	NA	0.321005	NA	NA	NA	0.363983	NA	0.910841	0.768611
A0A3B3ISR9	KCNC2	10	1	1.02249	0.970405	1.57884	1.24953	1.17172	0.80524	0.96076	1.11789	1.14149	0.813125	0.846502	1.08772	0.56606	0.995008	1.02925	0.950581	0.838693	1.29747	0.695142	1.00563	0.754642	0.605524	0.751491	0.545891	0.755992	0.770159	1.5422	0.902667	0.894407	1.06016	0.959723	1.15588	1.01787	1.07781
A0A3B3ISV4	VKORC1L1	26	1	0.722379	0.873789	0.797737	1.26953	0.968461	0.949031	1.08415	1.23304	1.19489	1.19974	1.05262	1.27291	1.00601	1.03741	0.914745	0.833758	0.940673	0.896658	0.944463	2.23732	1.21946	1.26026	1.63002	1.57808	1.09793	0.846222	0.911056	1.16	0.91685	0.802096	0.789961	0.806707	0.956728	0.830224
A0A3B3ISX9	TNXB	265	1	0.633244	0.955363	0.814861	0.912154	0.878038	1.04444	0.946329	0.988267	0.85385	0.97544	0.93835	0.848712	0.840491	0.887951	0.853105	0.93779	1.03884	1.13536	1.40784	1.45493	1.4918	1.76198	1.53426	1.09217	1.25176	1.17753	1.23235	1.66885	1.58521	1.23103	1.21458	1.23551	1.23	1.30459
A0A3B3IT28	KIF1A	109	1	1.20612	0.891823	0.981434	1.0193	0.918034	0.921023	0.911545	0.9263	1.02568	0.868032	0.898042	0.981461	0.958114	1.03079	0.936777	1.06016	1.08196	1.08064	1.07493	1.02886	0.941376	1.02333	1.08001	1.01024	0.908602	1.06179	1.06672	0.918237	0.998662	1.02506	1.08895	1.10031	0.988792	1.04387
A0A3B3IT47	WDR37	183	1	1.3499	1.15744	1.05894	0.97547	1.01565	1.06998	0.907347	0.9122	1.08471	1.03554	1.08174	1.05377	1.14921	1.12996	1.03581	1.06507	0.987769	0.852419	0.974675	0.852282	0.775487	0.771898	0.743935	0.884973	0.794541	0.889356	0.934128	0.796355	0.83982	1.07734	1.07692	1.12954	0.971717	1.0162
A0A3B3IT54	C8orf33	8	1	0.84342	0.785349	0.813217	0.996431	1.02209	0.848306	1.03005	1.13945	1.02801	1.05568	1.17201	1.0707	0.875205	0.935704	0.85964	0.905993	1.01625	1.43512	1.13097	1.39532	1.25408	1.35315	1.49138	0.979289	1.18811	1.11089	0.899731	0.966359	1.5764	1.30868	1.36927	1.84355	1.58394	1.46486
A0A3B3ITQ7	LMTK3	44	1	0.877206	1.00708	0.999606	0.841547	0.873568	0.957443	0.987096	1.02918	1.05382	1.0028	1.0273	1.1359	0.973576	1.0451	1.06559	0.872412	1.09644	1.2072	1.10969	1.09906	1.13425	1.16067	1.30102	0.936917	1.04215	1.03893	1.01449	1.00426	1.38105	1.17509	1.06917	1.31173	1.09944	1.39761
A0A3B3ITT1	RAB12	169	1	1.06307	1.06331	1.14208	1.09587	0.986682	0.83059	1.10419	1.11255	1.20293	1.16334	0.993219	1.0236	1.18403	1.12091	0.997499	1.0605	1.01669	0.7895	0.713815	0.943341	0.928604	0.911587	0.880376	1.09037	1.03743	0.806684	0.790878	0.855586	0.912948	0.804221	0.8852	0.974302	0.768838	0.902851
A0A3B3ITW6	KIF1A	205	1	1.35039	0.959563	0.906489	1.03891	0.898902	0.878511	0.963262	0.965136	1.0234	0.915972	0.947596	0.967639	1.14155	1.11008	0.988446	1.06747	1.06613	1.19374	1.07906	1.0253	1.0129	0.904327	1.06032	0.967342	0.975038	1.10435	1.08364	0.994612	1.06569	1.23953	1.15456	1.13046	1.18128	1.05881
A0A3B3ITX9	GET1-SH3BGR	42	1	0.715066	0.725685	0.975813	0.834953	0.698622	0.76312	1.00904	1.16707	0.980516	1.1783	0.843435	0.730249	0.983316	1.10433	0.845127	0.912622	1.32545	1.05649	0.940673	1.09761	0.965542	1.32371	0.988522	1.3585	1.50889	1.28163	0.922515	1.44929	0.943153	1.217	1.19689	1.25842	0.944418	1.21254
A0A3B3IU51	TJP2	15	1	0.984136	0.726243	0.736211	1.06593	1.07006	0.704063	1.02883	1.01884	0.955371	1.12724	1.05882	1.00952	0.633856	0.805495	0.976689	0.944542	1.23742	0.933847	1.1315	1.1791	1.01887	1.03771	1.22168	1.06398	1.36047	1.11219	0.957324	0.994614	1.91094	1.37462	2.03799	1.27018	1.27995	1.55732
A0A3B3IU69	EML1	88	1	1.42057	1.09541	1.03194	1.15457	1.0493	1.27266	0.90755	1.04129	0.981766	0.925778	0.962268	0.98958	1.07833	0.949912	1.00513	1.08481	1.08389	0.964695	1.02281	0.986855	1.04409	0.969263	1.00196	0.882467	1.03554	1.0875	0.943626	1.01616	1.06006	0.997144	1.13145	1.02809	0.941851	1.09365
A0A3B3IUC1	NEDD4	7	0.9996	0.910722	0.880122	0.875996	0.921576	0.971754	1.02713	0.91821	0.903807	0.821136	0.942484	0.852755	0.935033	0.885108	0.830893	0.738406	1.11307	1.02212	1.26604	1.07668	1.24772	1.17874	1.26631	1.42378	1.14524	2.04711	1.08228	1.16214	1.11685	1.2257	1.14004	1.27574	0.982958	1.25688	1.20191
A0A494BZV2	MPRIP	137	1	1.2207	1.02591	0.855587	0.95856	1.00747	0.93095	0.94321	1.00481	0.920106	0.905861	0.955226	1.08891	1.02004	1.07515	1.03691	0.90532	1.06779	0.984473	1.04413	1.10428	1.09331	1.0128	1.08959	1.05613	0.941691	1.0332	1.00565	1.05429	1.01832	1.07642	1.16354	1.07662	1.17749	1.10886
A0A494BZY7	EEF1AKMT2	7	1	0.657039	0.871318	0.826319	0.979106	1.05532	0.856181	1.00189	1.18917	0.919482	0.977072	0.963235	0.954395	0.841436	1.00869	0.991143	0.910144	1.06639	1.00606	1.0868	1.06113	1.20163	1.28935	1.08721	1.1488	0.928454	1.26701	0.942346	1.24694	1.26031	1.18034	1.21865	1.40139	1.72899	1.00164
A0A494C015	ELAVL4	52	1	0.8871	0.982992	1.1316	0.875837	0.904693	1.11609	0.901699	0.899951	1.15745	1.07303	1.07886	0.977371	1.00194	0.992723	1.03305	0.936185	1.02874	1.14759	1.16177	1.15223	1.01535	1.06343	1.2117	1.13396	0.875301	1.00607	1.18128	1.00177	0.944019	1.12811	1.0676	0.958101	0.924379	0.945955
A0A494C030	LOC114841035	1	0.9986	0.535489	NA	NA	1.12711	1.11763	NA	NA	NA	NA	NA	NA	1.13737	NA	NA	NA	0.720131	NA	NA	NA	NA	1.02639	NA	NA	NA	1.44222	NA	NA	NA	NA	NA	NA	NA	1.46777	1.26479
A0A494C0G5	AGRN	152	1	0.85875	0.894378	0.84054	0.981287	0.966794	1.15161	0.967891	0.915273	0.979104	1.00525	0.953873	0.970217	0.908668	0.935681	0.879609	0.898546	1.1992	1.33576	1.29296	1.23696	1.0866	1.14843	1.31036	1.04758	1.1892	1.12099	1.26854	1.1238	1.1449	1.23939	1.24084	1.4339	1.57931	1.35361
A0A494C0R8	CLUH	167	1	1.3525	1.00783	1.07794	0.947593	0.957373	0.901821	0.929013	0.860064	0.976004	0.967321	1.01348	1.05215	1.09554	1.08813	0.977019	1.1543	1.05041	1.00459	0.994919	0.960718	1.03522	1.03058	1.02387	0.949629	0.916236	1.02322	0.997102	1.01937	1.13564	1.02295	1.27208	1.21573	1.20104	1.13902
A0A494C109	CAMK1G	9	1	1.36686	0.884233	1.11572	1.13167	1.12443	1.01618	1.00406	1.06858	0.935864	0.940178	0.995929	0.999419	0.993954	0.990129	0.95904	1.01117	0.942358	0.977859	0.965677	1.10732	1.13654	0.898808	0.931664	1.0594	1.03513	1.00467	0.981543	0.86518	0.85261	0.974439	1.15685	0.93726	1.06733	0.981245
A0A494C143	DIP2A	34	1	0.784479	0.798135	0.819436	0.908533	1.0416	1.06146	1.06104	0.974184	0.956907	0.98045	1.01575	0.886527	1.0504	0.968689	0.993142	0.890798	0.900105	1.14062	1.29405	1.17328	1.25799	1.16546	1.30994	1.1383	1.20265	0.930038	1.09217	1.10918	1.34702	1.44596	1.31103	1.32311	1.23175	1.54471
A0A494C165	PEPD	185	1	1.38961	1.14176	1.12092	1.15351	0.958326	1.1103	1.0601	0.904694	1.01118	0.860306	0.883688	0.898402	1.15691	1.06205	0.972932	1.14374	1.09042	0.980344	0.920942	0.7883	0.779552	0.931124	0.825567	0.927031	0.879766	1.03339	0.906679	0.866163	0.724243	0.83654	0.746482	0.742287	0.784744	0.704027
A0A494C1D7	DST	9	1	0.722198	0.895042	1.04275	0.980801	1.14741	1.18983	1.17506	0.935307	1.01846	1.15834	1.12154	0.977201	0.766121	0.945346	1.01223	1.07438	0.725214	1.67691	0.913672	0.948143	1.10382	1.37358	1.0957	0.917479	1.0149	0.91483	0.827845	0.839441	1.32424	1.22367	1.12088	1.66115	1.39474	1.07282
A0A494C1I1	LOC728392	8	0.9892	0.952988	1.07733	0.79369	0.821013	0.995146	0.638526	0.859783	0.865109	1.46793	1.56968	1.37408	1.71579	1.64901	1.14931	1.21027	0.806863	0.984903	0.748813	0.653939	1.45304	0.829238	0.733291	1.04953	1.20524	0.945954	0.621648	0.860245	1.11148	1.10572	0.974314	0.974748	1.31176	1.38187	1.38445
A0A494C1K3	GTF2I	75	1	1.02712	1.03284	0.89595	0.987587	1.14065	1.03658	0.9762	1.00601	0.977816	0.915761	0.899201	1.00534	0.840408	0.995273	1.10144	0.943388	1.16363	1.25457	1.0424	1.01139	1.00558	0.806829	0.890311	1.05628	1.09787	1.196	1.09974	1.07636	0.975762	1.17601	1.23499	1.07715	1.07905	1.20392
A0A494C1U4	AQP1	4	0.9993	0.654239	0.798674	0.859743	0.812855	1.14879	0.901796	NA	NA	0.761459	0.948192	1.1636	0.866762	0.842388	NA	NA	0.82353	NA	1.02178	1.28425	0.902975	1.1524	1.60702	1.40117	1.1337	0.942899	NA	1.20004	NA	1.20517	NA	1.0744	1.5268	1.41181	1.49076
A0A499FIZ0	WDR26	98	1	1.41984	1.19246	1.05416	1.02065	1.13329	0.964681	1.01961	0.869918	0.96694	0.886489	0.953032	0.96166	1.07636	1.03691	1.03393	1.05097	0.930966	0.842018	0.91134	0.860106	0.942056	0.983881	0.918835	0.885043	0.834467	0.918006	0.925445	0.873138	0.798321	0.904251	0.983809	0.813145	0.984823	0.864007
A0A499FJ41	CAPS	17	1	0.776996	0.485896	0.388998	0.967264	0.604586	0.592351	0.477159	0.876364	0.535769	0.663896	0.508693	0.58565	0.600903	0.400879	0.429342	0.962829	1.55315	0.446648	1.14779	2.22404	1.62052	2.50791	1.65422	2.21594	5.21088	2.2458	1.64242	2.69442	0.923132	0.531558	0.479675	0.26576	0.289003	0.381237
A0A590UJ08	DLG1	11	1	1.12239	1.02397	0.998689	1.03224	1.01192	1.06769	0.78512	0.776183	1.08729	1.11621	1.14012	0.921243	1.07638	0.925265	0.733919	0.966101	0.819243	1.4659	1.06262	1.09283	1.1943	1.32191	0.949778	0.87501	1.03127	0.821041	1.17165	0.842827	1.08302	0.964232	1.73921	1.13595	1.72332	1.39864
A0A590UJ74	WASF3	1	0.9996	1.20701	NA	NA	1.0878	1.27952	NA	NA	NA	NA	NA	NA	0.789479	NA	NA	NA	1.34202	NA	NA	NA	NA	1.19032	NA	NA	NA	1.19231	NA	NA	NA	NA	NA	NA	NA	1.05947	1.06527
A0A590UJI2	CALM2	139	1	0.566702	1.89329	1.21534	0.653283	0.797685	0.990064	1.70646	1.54737	0.694475	1.19481	1.15744	1.74879	0.608436	0.923749	2.14154	0.678836	0.631458	0.828831	0.853982	1.03635	0.846964	0.650074	0.81949	0.700271	0.575084	0.633867	0.795292	0.717029	1.18239	1.00506	0.887177	0.876552	0.857902	0.914022
A0A590UJL1	RIMS2	113	1	0.758134	0.982028	0.986846	0.863221	0.912703	1.0394	1.03021	1.01352	1.05535	1.04002	1.06801	1.09513	0.98421	0.98307	1.09616	0.848053	0.923945	1.01406	1.09679	1.08218	0.949312	0.934198	0.901773	1.07872	0.909972	0.848392	0.928961	0.906016	0.906312	0.963728	1.02878	1.04728	1.11222	1.05166
A0A590UJL3	SHANK3	2	1	0.829597	NA	NA	1.19651	0.905502	NA	1.073	1.04065	NA	NA	NA	1.03045	NA	1.11216	1.01506	0.90405	1.06321	NA	NA	NA	0.721268	NA	NA	NA	1.14063	0.711385	NA	0.818727	NA	1.16923	NA	NA	1.50925	1.21332
A0A590UJR4	DLG1	290	1	1.20475	1.19744	1.01478	1.03944	1.05516	0.951564	1.09007	0.959059	0.965664	0.856439	1.00552	1.1134	1.08227	1.0151	1.09981	1.0027	0.956056	0.977417	0.985033	0.913017	0.911995	0.90703	0.934637	0.927576	0.94974	0.953715	0.990042	0.875572	0.974547	0.95776	0.977385	0.982692	1.01583	1.03897
A0A590UJU8	MYL2	2	0.9961	NA	NA	0.93166	NA	NA	NA	1.20696	1.4749	0.945894	2.14185	1.42905	NA	NA	1.11878	1.13146	NA	2.93147	1.11	NA	NA	NA	1.86051	1.45692	NA	NA	1.45956	NA	1.53502	1.22599	1.33474	NA	0.907933	NA	NA
A0A590UJZ8	RYR2	180	1	1.06231	0.945341	0.93501	1.00321	1.16171	1.08977	0.966574	0.965464	0.871469	0.959965	1.09918	0.870143	0.919337	0.911049	1.12401	0.919058	0.949328	0.988869	1.31202	1.13498	1.08947	1.07287	1.16163	1.04199	1.02625	0.914687	1.16615	1.0906	1.10844	1.57661	1.74145	1.43396	1.2183	1.24314
A0A590UK01	SRSF6	32	1	0.587781	1.09217	0.803394	0.732803	0.890977	0.993668	0.951049	0.760575	1.27475	1.19392	1.35567	1.236	0.860409	1.42617	1.12207	1.14131	1.02243	1.05676	1.35167	0.956618	0.913274	0.880353	1.0684	0.937247	0.895531	0.830573	1.11239	0.987098	1.31003	1.18064	1.46463	1.60515	1.73117	1.54544
A0A590UK28	GNAS	8	0.9992	0.930793	1.06588	0.962814	1.09247	1.06559	1.10149	1.18331	1.16345	0.84965	0.911674	0.965065	0.870195	1.05888	1.03217	0.966161	0.958398	1.00538	1.03438	0.964539	1.0394	1.05388	1.08224	1.21685	0.910104	1.15094	1.23852	0.907873	1.06737	1.08977	1.03273	1.01322	1.05368	1.08745	1.02543
A0A5F9UN28	KCNAB2	165	1	1.16045	1.21314	1.08525	1.12609	0.974084	1.18019	0.982418	0.966881	1.05659	0.86506	1.07679	1.02859	1.08711	1.13059	1.1887	1.0382	0.955456	1.18737	0.922204	0.645966	0.690459	0.661799	0.778284	0.798891	0.712089	0.835867	0.945345	0.622948	0.66574	0.820358	0.596815	0.579076	0.678034	0.646518
A0A5F9UQ55	FBXW4	5	0.9998	0.729483	1.09055	0.747493	0.976955	0.999925	1.31554	1.12919	0.711094	1.24886	1.04832	1.26337	0.943418	1.19652	0.810614	0.864187	0.850443	0.78666	1.48045	1.1664	1.0896	1.26772	0.911597	1.32595	1.06816	1.00621	0.974159	1.46103	0.821527	1.39225	0.92515	1.37726	1.54754	1.1927	1.46058
A0A5F9ZGS7	ANK2	11	1	0.98065	0.927472	0.937266	0.950486	1.13268	0.894634	0.787327	1.10622	1.53965	1.0288	1.00913	1.03551	1.03311	1.06771	0.781156	1.08046	1.11546	0.961631	0.788937	0.886964	0.776543	0.986982	0.857016	0.934968	0.904822	1.02348	0.869274	1.01307	0.632327	0.731245	0.870079	0.725726	0.85673	0.975657
A0A5F9ZH79	ASCC1	54	1	1.04533	1.0043	0.932417	1.02581	1.04412	1.03776	0.96277	0.926986	0.918713	0.931397	1.01502	0.883206	1.07882	0.924361	0.924819	1.06942	0.990766	1.04275	0.989973	0.881766	0.951698	0.974361	0.976577	0.934577	1.22138	1.14482	1.09437	0.952727	1.06295	0.995715	1.03846	0.918783	0.972219	1.05694
A0A5F9ZHB4	DPEP3	2	1	NA	NA	NA	NA	NA	NA	0.784202	0.777787	NA	NA	NA	NA	NA	0.940578	1.06477	NA	0.966329	NA	NA	NA	NA	NA	NA	NA	NA	1.0996	NA	1.02462	NA	0.973652	NA	NA	NA	NA
A0A5F9ZHJ0	ACAT1	15	1	1.45496	0.914689	1.02371	1.19093	1.09634	1.12668	0.956077	1.18053	0.834834	0.726794	0.80358	0.915117	0.966968	0.933182	0.796723	1.15115	1.06388	0.851896	0.923007	0.870795	0.747733	1.12251	1.03351	1.00669	0.887467	1.28612	1.16783	1.17476	0.804937	0.742677	0.818237	0.788917	1.25789	0.399565
A0A5F9ZHR4	AQP4	157	1	0.883691	0.878648	0.972282	0.800771	0.906033	0.940209	1.26557	1.92947	1.01478	1.11854	1.08995	1.17005	1.01891	0.890733	1.09104	0.673685	0.738647	0.76994	0.944903	0.972647	1.05185	1.11149	0.866369	1.3979	1.21124	0.956313	0.956522	1.28099	0.914995	0.9807	1.00792	0.870034	0.599104	0.943786
A0A5F9ZHR5	CAMK2A	20	1	1.13704	1.39659	1.16661	0.868267	1.01738	1.54595	1.4581	0.957652	1.62007	1.11023	0.946726	0.926198	0.574519	0.740301	1.00092	0.782742	0.923169	1.78902	0.886377	0.691584	0.849127	0.86793	0.944439	1.07174	0.603972	1.00743	1.25548	0.601138	0.495515	0.81264	0.644225	0.828857	1.11724	0.823723
A0A5F9ZHS1	ANK2	2188	1	1.27069	1.11116	1.00464	1.03071	0.972785	0.954217	0.947946	1.07415	1.04411	0.821381	1.0163	1.21581	1.12945	0.921387	1.04621	0.927583	0.996669	0.834723	0.893469	0.981616	0.976223	0.963149	0.986258	1.01344	0.914752	0.917065	0.970748	0.949953	0.911381	1.03012	0.922473	0.961319	0.993833	0.906522
A0A5F9ZHW1	AP1S2	32	1	0.974207	0.944793	0.971911	1.11026	0.956025	1.01799	1.03874	1.14542	1.22949	1.09786	1.03715	1.07072	0.986118	0.893426	1.02638	1.00351	0.957167	1.04028	0.845319	1.08106	0.982805	1.13297	1.13389	0.937293	1.2016	0.925812	0.870808	0.915229	0.900954	1.03304	0.731995	1.01591	1.0692	0.962756
A0A5H1ZRP4	NELFB	4	0.994	0.745381	NA	NA	1.01947	1.09593	NA	0.914313	0.781752	NA	NA	NA	1.01124	NA	1.01469	0.792468	1.03057	0.981264	NA	NA	NA	1.2419	NA	NA	NA	1.14551	1.27489	NA	1.08523	NA	1.29151	NA	NA	1.19257	1.37046
A0A5K1VW61	CPEB2	9	0.9997	1.22131	1.20465	0.837194	0.97073	1.04108	1.35259	0.843274	0.864613	1.07653	1.18602	1.0116	1.07082	1.16095	0.992637	0.882066	1.03258	0.879166	1.15544	1.27365	1.7169	1.1172	1.24165	1.31744	1.4628	1.27542	0.923171	0.926816	1.13648	1.1569	1.07536	1.0682	1.51072	1.12071	1.06609
A0A669KAW7	CFAP298-TCP10L	11	1	1.00789	0.806456	0.983566	0.910644	1.23993	1.09009	0.971037	0.90839	0.968999	1.1731	0.962459	0.618059	1.04481	1.12084	1.04616	0.825519	1.23236	1.1378	0.995314	1.27547	1.02591	1.16938	1.0714	1.24315	1.12286	0.82062	1.01399	1.23831	1.09565	1.05965	0.866847	0.922487	0.684419	0.748871
A0A669KB05	CTNND1	192	1	1.04348	0.960675	1.01676	0.970333	1.04359	1.03511	0.967062	1.04166	0.924198	0.988203	1.06717	1.00094	0.928676	1.02992	1.12948	0.960189	1.0011	1.0415	1.09036	1.01625	1.05128	1.01771	1.04745	0.966403	1.08454	0.99169	1.11361	1.06418	1.03061	1.18978	1.29572	1.22956	1.12513	1.24978
A0A669KB27	DUS4L-BCAP29	59	1	1.49826	0.956505	1.26604	1.20458	1.19512	1.01079	1.28005	1.45817	1.03912	0.951516	0.958167	1.12968	0.787165	1.02488	1.06391	1.19803	0.78867	1.03476	0.743249	1.05393	0.995473	0.986839	0.982955	1.04742	0.974353	0.84713	0.774695	0.96455	0.738491	1.11938	1.2278	1.14254	1.01159	0.785662
A0A669KB77	MAP2	2021	1	1.13531	1.42129	1.10456	0.880466	0.922138	0.922323	0.993471	1.11596	0.946394	0.903334	1.10272	1.33523	1.29087	1.02133	1.30291	0.828798	0.948343	0.613121	0.671946	0.697929	0.738233	0.800679	0.742955	0.885305	0.550958	0.707146	0.84302	0.787056	0.695998	0.678958	0.6485	0.668424	0.58707	0.660949
A0A669KBH4	CUL7	19	1	0.879407	0.863158	1.17874	1.11111	1.14196	1.14381	0.892044	0.937431	1.01049	1.34842	1.12077	0.988319	1.01563	0.869901	0.874288	0.819978	0.823447	1.03664	1.1824	1.24132	1.15653	1.41584	1.30562	1.19799	1.3506	0.965073	0.907621	1.09162	1.22944	1.02502	0.988072	1.47041	1.816	1.20591
A0A669KBJ6	ANK2	2	0.9941	0.813453	NA	0.775379	0.963809	0.807446	NA	NA	NA	1.27682	1.15349	1.11867	0.954076	NA	NA	NA	1.02509	NA	1.08577	NA	NA	1.74636	1.17044	1.16018	NA	2.42762	NA	NA	NA	1.19087	NA	NA	1.20266	2.47887	1.30761
A0A6I8PUE4	ADGRL2	39	1	1.04853	1.03057	1.07425	0.972386	1.11138	0.997437	1.10516	0.994451	0.990507	0.971227	1.06824	0.969698	0.986982	1.09927	1.13755	1.00135	0.820721	0.79564	0.970803	1.07301	0.95852	1.13021	1.06518	0.928255	0.869062	0.881399	0.9747	1.18112	1.10632	1.05349	1.16431	1.31567	1.13032	0.950398
A0A6Q8PEX6	ELP1	39	1	1.00158	0.96595	0.990128	1.06939	1.0722	0.924889	1.02682	0.968912	1.05951	1.02488	1.16768	1.13185	0.959633	1.19289	1.28023	0.891278	1.21961	1.19435	1.1579	1.07746	1.08395	1.15367	1.10307	0.96574	1.14417	1.03672	1.14945	1.27401	1.29532	1.2949	0.945104	1.42831	1.19615	1.2864
A0A6Q8PEY3	NDE1	24	1	0.891741	0.990517	1.02553	0.960202	0.957471	0.980793	1.11605	1.02054	0.984428	1.21792	1.08148	1.03449	0.738209	1.05288	0.887575	1.30465	0.789116	1.54294	1.14464	1.36263	0.969841	0.96869	1.21184	0.873584	1.18535	1.0649	1.02467	0.94923	1.06082	1.02571	1.33104	1.07743	1.21586	1.17911
A0A6Q8PEZ4	GDAP1	30	1	1.16306	0.786511	1.09186	0.897161	0.839131	0.941717	1.01171	1.05918	1.05216	1.05756	1.24379	0.995151	1.08529	0.866872	0.935213	1.04543	0.992209	0.978676	0.89407	1.04227	0.98702	0.963322	0.930291	0.885518	1.00988	0.909456	0.937018	0.760176	1.54543	1.31574	1.72927	2.23831	1.5275	1.59752
A0A6Q8PF18		344	1	1.50331	1.15026	0.975658	1.22078	1.16677	1.14762	0.842778	0.87884	0.932435	0.813353	0.958896	1.00431	0.909214	0.843226	1.0325	0.997481	0.959269	0.937851	0.984865	0.82131	0.763125	0.73405	0.839668	0.748631	0.846032	0.926614	0.939662	0.716002	0.919506	0.997563	0.955177	0.88197	0.940436	0.963914
A0A6Q8PFE4	ACTB	9	0.9971	1.15033	0.976074	1.11592	1.09558	1.13048	0.938391	1.05256	1.17295	0.987428	0.928985	0.813643	0.885602	1.25822	0.938243	0.780758	1.21317	1.30954	0.705145	0.807532	0.859346	1.10014	1.22825	0.870274	1.26065	0.998946	1.22151	0.991207	1.24578	0.497093	0.967356	0.680252	0.374073	0.699233	0.577416
A0A6Q8PFJ0	LMNA	340	1	0.886735	0.855586	1.16679	0.90448	1.28229	1.22239	0.867418	1.01339	0.845304	1.03063	0.96159	0.832112	0.737472	0.907632	0.950315	0.945287	0.918861	1.1909	1.06669	1.03929	1.1275	0.974386	1.07751	0.947354	1.16322	1.02802	1.25463	1.10704	1.48534	1.5467	1.78505	1.46159	1.65226	1.64926
A0A6Q8PFQ8	AIFM1	8	1	1.07024	0.999852	1.22573	1.08752	1.07765	0.946146	1.0178	1.12906	0.882581	0.860925	0.994392	0.945915	1.02762	0.899015	1.04244	1.22163	1.07136	1.00571	0.925857	0.944585	1.07049	0.931549	0.9415	0.921065	0.994018	0.965783	0.859403	1.19056	0.966972	1.25858	0.917692	0.826924	1.11521	0.948697
A0A6Q8PFU0	GABRB2	93	1	1.2242	0.919504	0.910949	1.11327	1.04573	0.986129	0.962603	1.06067	1.17658	1.06862	1.08092	1.07911	0.843509	1.03238	1.09779	0.90342	0.875616	1.13725	1.05253	1.08429	1.08292	0.979822	0.970555	1.09211	0.992035	0.737292	1.10228	0.807046	1.13014	1.39153	1.32362	1.54931	1.38067	1.42196
A0A6Q8PG37	KIF2A	197	1	1.39934	0.992817	0.946441	0.913437	0.995308	0.911342	0.917786	0.956911	0.973916	0.981098	0.998403	0.95079	1.00887	1.22543	1.00921	1.05116	1.00274	0.996894	0.983572	0.918381	0.945096	0.938759	0.941201	0.949058	0.945062	0.903485	0.980325	0.897499	1.0498	1.09349	1.29689	1.16437	1.13461	1.12082
A0A6Q8PG75	CLCC1	24	1	0.908742	1.0248	1.1985	0.841986	1.0965	1.11584	0.889123	1.03205	0.78689	0.902449	1.27979	0.895043	0.910315	0.844546	1.12757	1.04897	0.900956	1.07574	1.0083	0.887293	0.949364	1.08364	1.08078	0.983011	0.963196	0.934791	1.13733	1.33104	1.05813	1.11552	0.960985	1.14723	1.1963	0.918817
A0A6Q8PGB9	SLC52A2	8	0.9997	1.076	0.81111	0.94817	1.1191	1.0045	1.02164	1.28618	0.915318	0.978881	0.954383	1.01108	1.20358	1.03874	1.07658	1.11857	0.917748	0.90134	1.0959	1.34839	1.3565	1.07723	0.995935	1.16984	1.18264	0.965458	1.02379	1.02444	0.815496	0.936309	1.1718	1.1821	1.35925	1.50135	1.38708
A0A6Q8PGN6	CAST	19	1	1.20261	1.14437	1.20359	0.95712	1.08242	1.45716	1.23367	1.21276	1.07252	1.01205	1.11271	0.937007	0.928345	0.836932	1.23234	1.04762	0.673443	0.908329	1.02548	0.742959	0.702105	0.584234	0.676785	0.921424	0.692609	0.862229	0.761077	0.555985	1.27564	0.768245	0.741452	1.16604	0.705074	0.773138
A0A6Q8PGS5	MTMR2	3	1	1.15681	0.94427	NA	1.10601	0.873482	0.79858	1.13195	1.00133	NA	NA	NA	0.843935	1.11223	0.852978	1.11792	0.908351	0.938874	NA	0.949407	1.28665	0.93205	NA	NA	1.18527	1.13929	1.1186	1.29377	0.941661	NA	1.17537	1.33491	NA	1.01411	0.952836
A0A6Q8PGV8	MFN2	81	1	1.10419	0.900468	0.927905	1.03017	1.05607	0.984481	1.01165	1.06685	0.996896	1.03652	1.05442	0.944078	0.98814	0.964122	1.07007	1.01182	0.989956	1.088	1.10182	1.01224	1.07732	1.03856	1.02371	0.943451	1.09488	0.984026	1.11477	0.93645	1.17566	1.24795	1.50702	1.28959	1.28094	1.40221
A0A6Q8PH20	CAST	383	1	1.02361	1.08623	1.18798	0.965437	1.13199	1.12896	1.22436	1.07944	0.978355	1.01653	1.00303	0.960069	0.906717	0.89492	1.06446	0.991194	0.908207	1.0212	0.995148	1.0136	1.03871	1.0404	0.99832	1.08571	1.09496	0.963592	0.831603	1.22262	0.920007	0.82232	0.687187	0.825792	0.743561	0.80698
A0A6Q8PH97	GDAP1	112	1	2.29896	1.31323	1.38617	1.19513	1.01089	0.921318	1.02905	1.12181	0.939696	0.673863	0.809494	1.00769	1.2047	0.888895	0.828168	1.26972	1.01481	0.692793	0.64707	0.602585	0.614729	0.496144	0.534704	0.786238	0.811286	0.832482	0.853569	0.50369	0.518296	0.78861	0.730864	0.596781	0.534484	0.557201
A0A6Q8PHC0	AIFM1	266	1	1.23051	0.994446	1.10358	1.22143	1.27839	1.09085	1.16071	1.13075	0.826168	0.793012	0.990919	0.907323	0.953417	0.891377	1.06223	1.25576	0.888896	1.01998	0.946813	1.01479	0.976919	0.948785	1.0288	0.886535	0.99934	0.909498	0.990584	0.94216	0.869492	0.955673	0.842501	0.849105	0.902792	0.874783
A0A6Q8PHK0	TRIP12	81	1	0.74934	1.00644	0.966884	0.875959	1.0411	1.07846	1.05632	0.89907	1.04249	1.16818	1.07888	0.922971	1.10907	1.12995	1.08804	0.946239	0.840178	0.913674	1.13753	1.07241	1.11681	0.884145	1.00917	1.145	1.0329	0.992005	1.0313	0.911624	1.09735	0.931011	1.13757	1.00399	1.07281	1.10662
A0A6Q8PHP0	NT5C2	95	1	1.85168	1.01906	1.26497	1.26199	1.11867	1.10455	0.914452	1.06926	0.8682	0.766023	0.905363	0.909724	0.946269	0.954373	0.902375	1.27562	0.879161	1.02563	0.765664	0.788243	0.870613	0.843001	0.788556	0.752899	1.13032	1.07324	0.76564	0.817937	0.789835	1.06084	0.997102	0.82715	0.882147	0.917562
A0A7I2PLE3	MAPT	111	1	1.2561	1.17868	1.16589	1.02983	0.964835	1.06591	1.01059	0.953816	1.00878	1.01844	1.09449	1.11538	0.818007	0.768468	1.0043	0.817396	0.994215	1.00313	1.17272	1.27053	0.999612	1.23712	0.947918	0.856524	0.882994	1.22178	0.963767	1.0087	0.89623	0.858312	0.967572	1.04713	1.12645	0.854392
A0A7I2ST14	NDRG1	8	1	0.540417	0.69333	0.891583	0.562288	0.950112	0.620033	2.40884	1.76214	1.04678	1.3896	1.44603	0.813248	0.66796	1.30516	1.81179	0.482019	1.3655	1.88961	0.808984	1.24764	1.28436	1.71965	1.87349	0.761672	1.0044	2.09555	0.415605	2.38057	1.56329	1.48299	1.03985	1.44606	1.1424	0.928235
A0A7I2V2G1	STAT3	38	1	1.23117	0.946213	1.97442	1.07905	0.970729	0.953193	0.84613	0.989339	0.854507	0.92408	0.918935	0.764672	0.763933	0.857334	0.900865	0.918849	0.796579	0.874556	0.881951	0.80997	0.897735	0.935047	0.836977	0.771697	0.984248	0.912049	0.972037	0.92999	0.836824	1.15121	1.16635	1.12483	1.16006	1.28214
A0A7I2V2H9	EIF3E	133	1	1.59291	1.18902	1.22198	1.06727	1.06859	0.930488	0.920225	0.925541	0.859532	0.833247	0.917171	0.899714	1.02629	1.1413	1.01742	1.14865	0.988025	0.783162	0.814208	0.690131	0.794368	0.782205	0.663614	0.779706	0.83868	1.0269	0.982112	0.79496	0.707762	0.722681	0.753795	0.698138	0.68942	0.779356
A0A7I2V2S7	HSPA9	17	1	3.01684	1.22716	1.64911	1.45076	1.52193	1.15577	0.988805	1.0504	0.733329	0.60053	0.87015	0.887801	0.850901	0.909483	0.985391	1.46288	0.618372	0.69626	0.698698	0.337299	0.43557	0.456341	0.385305	0.449006	0.471263	0.721161	0.841768	0.361551	0.460377	0.563525	0.660632	0.669424	0.581239	0.590237
A0A7I2V2Y9	ACBD5	139	1	0.898971	0.95662	0.965386	0.92407	1.07554	1.07955	0.993325	1.07169	1.02059	0.997876	1.09001	1.02981	0.894955	0.989553	1.03758	0.956809	1.06756	1.2143	1.06636	0.898357	0.909906	0.859171	0.923493	0.917932	1.02742	0.961729	1.03535	0.867749	0.925193	0.959512	0.979249	0.862637	0.78548	0.833415
A0A7I2V352	KIF5C	11	1	1.45121	0.908662	1.36529	0.921002	1.05583	0.949609	0.695304	0.899238	0.873474	0.781585	0.872611	0.904078	0.824643	0.671988	0.874695	0.843933	0.791314	0.982298	0.793338	0.933188	1.10187	0.952964	1.00661	0.800669	1.01134	0.891532	0.810035	1.03203	0.863875	1.17447	1.62682	1.15489	1.31182	1.06888
A0A7I2V383	BCL2L2-PABPN1	10	0.9999	0.871751	1.02245	1.02998	0.753084	0.997728	1.05527	1.06785	0.794335	1.49225	1.35438	0.976213	0.805738	0.912773	1.26219	0.937887	1.05501	0.961334	0.988398	0.612914	0.571905	0.584898	0.660793	0.652407	1.00039	1.16134	0.922486	1.15018	0.576157	0.578959	0.424027	0.463603	0.325983	0.330126	0.451142
A0A7I2V3E3	IDE	40	1	1.52368	0.74704	1.58554	0.996382	0.883439	0.878196	0.94931	0.946005	0.776881	0.785638	0.746895	0.890039	0.823251	1.04925	0.930907	1.07238	0.952431	0.94672	0.907595	1.01078	0.983295	1.00267	0.988995	0.842488	0.9917	0.897933	0.891926	1.10464	0.882784	1.03975	0.935001	0.874318	1.03985	0.924327
A0A7I2V3E8	CTSH	68	1	0.904573	0.866106	0.814746	1.19683	1.08322	0.882102	1.27723	0.763328	0.78173	0.774521	1.09245	1.22094	0.948659	1.17202	1.19655	0.992673	1.22293	0.706022	1.06114	0.99582	1.13321	1.09729	1.17968	1.20732	1.44483	1.1645	1.06273	1.27904	0.776772	1.05826	0.693991	0.842935	0.807827	0.771543
A0A7I2V3F7	HSPA9	476	1	1.86877	0.99004	1.42828	1.1937	1.37086	1.04169	1.09762	1.08677	0.806421	0.700598	0.866918	0.795543	0.841709	0.863909	0.96809	1.24523	0.775161	0.873	0.793223	0.675147	0.67438	0.713815	0.669421	0.691556	0.72697	0.953627	0.885151	0.727869	0.741984	0.970037	0.87853	0.839898	0.810618	0.776044
A0A7I2V3J9	PABPC1	12	1	1.4297	0.789038	0.915222	0.963416	0.867837	1.04101	1.02949	0.95153	0.802308	1.00058	0.986044	0.779753	0.951857	0.92413	0.924756	1.06827	0.852104	0.802463	0.974943	0.979342	1.24814	0.740697	0.45933	0.806073	0.927489	1.1613	0.927328	1.1271	0.54243	0.989713	0.600875	0.969825	1.04394	0.907914
A0A7I2V3P9	G3BP2	16	1	0.926702	1.06858	0.834869	0.892393	1.06949	1.01687	0.641689	0.999778	0.914948	0.96832	1.12282	1.09943	1.01335	1.07484	1.065	0.831184	1.3807	0.967987	1.05218	1.1393	0.993325	1.10013	0.972963	1.00413	1.02911	1.20416	1.0612	1.05005	0.800128	0.795764	0.850811	0.912732	0.787898	0.755657
A0A7I2V3R4	LOC122319436	13	1	1.19362	0.880202	1.15618	0.885859	0.941193	0.844926	1.08165	1.03985	0.794733	0.964699	0.876968	1.03065	1.27593	1.19041	1.08119	1.09678	1.25133	0.689216	1.37314	1.27638	0.851117	0.968617	0.711862	1.27847	0.96121	1.15664	1.17691	1.41327	0.825065	1.19677	1.23585	0.648598	1.1156	0.98086
A0A7I2V4L7	PABPC4	187	1	1.51605	1.13821	1.1865	1.17638	1.26611	1.06151	0.888022	0.913517	0.955631	0.775401	0.918964	0.955482	1.02432	0.920685	1.01038	1.08753	0.980748	0.852468	0.788887	0.751997	0.804111	0.770803	0.737588	0.708832	0.849336	0.95698	0.91139	0.762199	0.743199	0.838514	0.67574	0.744503	0.812948	0.706103
A0A7I2V4S6	CTSB	3	0.9954	0.662935	0.639173	0.839418	0.749518	0.9582	1.14901	NA	NA	1.10262	1.13011	1.072	0.887943	0.953332	NA	NA	0.873731	NA	1.25952	1.04403	2.07309	1.12606	1.03187	1.17985	1.66023	1.3305	NA	0.847906	NA	0.868476	NA	0.85957	1.00754	1.10312	0.862071
A0A7I2V4V1	PPIA	16	1	1.68245	1.06732	1.24622	1.34278	0.986003	0.64836	0.832944	1.22364	1.62152	1.4121	0.824406	1.21508	1.55966	1.20364	0.574677	1.05747	1.14485	0.537779	0.312335	0.516827	0.725325	0.975698	0.518802	1.26989	0.819121	0.636775	0.462785	0.651856	0.18551	0.199963	0.234914	0.229688	0.265332	0.184266
A0A7I2V581	KIF5C	136	1	1.76249	1.01902	0.942909	1.05896	1.09989	0.945796	0.857869	0.923285	0.937414	0.932141	1.01521	0.96804	0.92863	0.931917	1.01545	0.936285	0.923414	1.01435	1.03137	1.08669	1.09129	0.994858	0.980709	0.909817	0.975458	0.964598	0.961357	0.974584	0.994392	1.25391	1.40751	1.15372	1.14497	1.29239
A0A7I2V586	ACO2	576	1	2.38608	1.02504	1.37711	1.25568	1.23647	1.11868	0.845482	1.26249	0.80912	0.593236	0.894979	0.860604	0.970054	0.971015	0.91047	1.32943	0.788943	0.742623	0.575336	0.478703	0.573	0.642002	0.494655	0.577099	0.770273	0.799648	0.781075	0.540964	0.572452	0.720473	0.625373	0.65334	0.54104	0.549033
A0A7I2V5G9	ABLIM2	5	1	0.704111	1.13136	2.00216	0.563071	0.846119	1.13323	0.900101	0.923505	1.29407	2.13209	1.74247	0.987487	1.04243	0.94583	0.814798	0.692712	0.727358	2.15966	1.19457	1.24313	0.818257	1.77976	1.56959	0.786851	0.761339	0.946526	1.23039	0.712835	1.59074	0.85689	1.50347	2.16266	1.04266	1.12562
A0A7I2V5I2	SCFD1	156	1	1.61676	1.04386	1.06084	0.965441	0.928065	0.896378	0.928692	0.983181	0.849435	0.898823	0.910525	0.971975	1.09475	1.27326	1.01531	1.35789	1.07385	0.957837	0.927251	0.863558	1.04023	0.940565	0.883733	1.01193	0.96013	1.10706	1.04174	1.09125	0.873828	0.971533	0.842443	0.830515	0.861872	0.838876
A0A7I2V5J8	NPM1	11	0.9998	0.769649	0.854356	0.987634	0.85599	1.06971	0.967252	0.735788	1.03495	1.36763	1.15752	0.987238	0.986345	0.966172	0.764125	0.743517	0.740313	1.22271	1.03946	0.937964	2.17408	1.21554	1.35408	1.45706	1.35889	1.28624	0.987467	1.20624	1.54117	0.606021	0.607789	0.636716	0.630809	0.60692	0.543762
A0A7I2V5R6	GNAS	7	1	2.22105	1.53182	1.22056	0.926943	1.08183	0.653976	1.1373	1.10522	0.89742	0.749032	0.847333	1.10284	1.40441	1.62925	1.03023	1.55338	1.02927	0.515241	0.474944	0.391963	0.558733	0.59723	0.339341	1.1249	0.77788	1.21887	1.14041	0.788908	0.451145	0.851836	0.51262	0.563215	0.41209	0.472563
A0A7I2YQE1	KPNA2	8	1	1.28011	1.19964	1.24884	0.956235	1.14243	1.17731	1.12847	0.629896	1.36178	1.15742	1.22136	0.708353	1.12134	1.07651	0.879272	1.03537	0.935836	1.19135	0.978539	0.99257	1.2089	0.617725	0.738874	0.926127	1.15975	0.775539	1.27178	0.71404	1.05368	1.12242	1.21466	1.56852	1.10474	1.25293
A0A7I2YQN2	SYNCRIP	172	1	1.40011	1.27137	1.07783	1.01731	0.995725	0.98553	0.893325	0.872904	1.01808	0.883799	0.997841	0.978343	1.11391	1.10698	1.05177	1.1054	1.01294	0.935812	0.85916	0.793149	0.813396	0.777452	0.756078	0.751385	0.8924	0.982474	1.05892	0.673551	0.684845	0.777863	0.709634	0.701225	0.719265	0.858984
A0A7N4I394	PRPF40A	74	1	0.978413	1.17232	0.986615	0.991156	1.37431	1.24549	0.887447	0.922522	0.834124	0.863373	0.970878	0.970452	0.759343	0.829015	1.05242	0.94813	1.07578	0.994217	1.1044	1.08496	0.963337	1.04466	1.07237	0.865198	0.923531	0.957675	1.07418	0.91229	1.08166	1.21742	1.00977	0.946303	1.30077	1.14191
A0A7N4YH79	TENT4B	4	0.9988	NA	0.863467	1.04463	NA	NA	1.03466	0.927192	0.949915	1.04317	1.5017	1.16973	NA	0.838522	1.02113	0.946068	NA	0.989748	1.15222	1.42691	1.53988	NA	1.28954	1.25624	1.13005	NA	1.08214	1.13517	1.14007	1.43279	1.40407	1.2277	1.23385	NA	NA
A0A7P0MQR8	MACF1	9	0.9998	1.4986	0.779307	1.0205	1.08257	1.02336	1.13045	1.02155	1.01672	0.974392	1.00071	1.03657	1.28593	0.891142	0.937504	0.990652	0.935506	0.97202	1.04049	1.04964	0.972174	0.92607	0.870479	0.951794	0.87898	0.967697	1.11159	0.926212	1.00453	0.980038	1.19549	1.29168	1.14103	1.35689	1.46407
A0A7P0N5L0	R3HCC1	22	1	0.926589	1.07217	0.932556	1.17961	1.17594	1.19809	0.944617	0.998777	1.08129	0.942757	1.12294	1.09072	1.58613	1.29053	1.01497	1.073	0.953151	1.25916	1.52616	0.992467	1.23941	1.12284	1.32817	1.084	0.98161	1.10857	1.35669	0.990411	1.1139	1.30695	1.13627	1.20581	1.051	1.21589
A0A7P0T808	PIP5K1C	226	1	1.09049	1.02664	0.998492	1.02521	0.9811	0.966607	0.961247	1.00779	1.03405	1.01206	1.10417	0.959904	0.986199	1.05875	1.10043	1.04572	0.88186	1.00138	1.04013	0.999332	0.964959	0.944181	0.951599	0.959396	0.890459	0.93874	0.978182	0.970278	1.11183	1.07381	1.10576	1.14284	1.0786	1.07688
A0A7P0T890	DST	499	1	1.44733	0.962297	0.921597	1.10453	1.07541	1.01294	0.895909	1.03506	0.994226	0.882281	0.962404	0.954575	0.898232	0.859995	0.983463	0.917811	1.04481	1.10164	1.02189	1.02184	1.01305	0.977766	1.04373	0.969097	0.992226	1.13373	1.05191	1.00398	1.00472	1.27062	1.35604	1.25701	1.18247	1.1726
A0A7P0T8A7	BSG	8	1	0.868185	0.867359	0.937039	1.00914	0.911378	1.00923	1.08283	0.981952	1.15445	1.14828	1.17694	1.01885	1.03419	1.1219	0.929071	0.735785	1.14886	1.42608	1.22884	1.41061	1.04721	1.24911	1.26416	1.05267	0.868334	1.35498	1.14208	1.18133	1.30252	1.3031	1.10178	1.44344	1.5271	1.30292
A0A7P0T936	MAPT	537	1	1.31705	1.37367	1.10277	0.968365	1.11424	1.1376	0.946624	0.980193	1.04618	0.91396	1.16183	1.21022	1.15016	0.879873	1.14015	0.934899	0.904647	0.636526	1.09898	0.787026	0.63029	0.625902	0.638518	0.778421	0.632326	0.765594	0.87629	0.62506	0.701981	0.724004	0.540743	0.597318	0.644968	0.550725
A0A7P0T9F1	DYNC1H1	365	1	1.62582	0.99908	0.944272	1.05698	1.138	1.11752	0.83252	0.946078	0.99568	0.873642	1.04283	0.887862	0.87297	0.898523	1.04009	0.922139	0.888345	1.13647	1.14276	1.02514	0.976157	0.919508	0.990943	0.909691	0.94987	0.972706	1.14729	0.979186	1.10806	1.39145	1.49903	1.35769	1.14124	1.31725
A0A7P0T9J6	SMPD4	13	0.9998	0.669974	0.951783	0.843158	0.734435	1.09267	1.22647	1.04644	0.986115	0.765156	0.935875	1.03872	1.06148	0.768063	0.926861	1.06901	0.753269	0.986922	1.33287	1.09682	1.47106	1.17371	0.973192	1.17723	1.12926	1.22077	0.940863	1.01465	1.22397	1.25613	1.16665	1.23479	1.15741	1.02181	1.15463
A0A7P0T9K5	CIC	53	1	0.849579	0.991639	0.935197	1.04457	1.0164	0.952306	0.987265	1.11173	1.02176	1.01319	0.894706	1.18098	1.03766	0.911626	0.966441	0.865243	1.02141	1.21029	1.05572	1.17283	1.29538	1.32628	1.17077	1.19176	0.82006	0.993844	1.11143	1.1476	1.23073	1.09291	1.20497	1.30146	1.10613	1.12004
A0A7P0T9P5	CUL4B	100	1	2.25322	1.10328	1.2308	1.13958	1.12563	1.13308	0.877275	1.01532	0.729429	0.707699	0.850138	0.885606	0.890536	0.884041	0.952685	1.09736	0.831181	0.703585	1.03267	1.02948	0.900211	0.891084	0.732007	0.850288	0.969617	0.935955	0.971844	0.96854	0.816301	1.23832	1.43495	1.28042	1.08365	0.980772
A0A7P0T9R3	NAXD	198	1	1.05517	0.91496	1.05473	1.0614	1.07606	1.14496	1.0729	1.0057	1.08913	1.09752	1.03885	1.04273	1.21408	1.03086	0.997668	0.95178	0.932056	0.868321	1.00901	0.826758	0.860494	0.973733	0.946947	0.940227	0.962353	0.990956	0.925455	0.89724	0.804062	0.76652	0.66769	0.885791	0.662577	0.677423
A0A7P0TA18	NAXE	4	0.9974	0.851678	0.805692	NA	1.3512	1.02975	0.894673	NA	NA	NA	NA	NA	1.41167	0.870063	NA	NA	0.953955	NA	NA	1.00627	1.26914	1.87454	NA	NA	1.30108	1.18792	NA	1.1436	NA	NA	NA	0.997876	NA	0.953402	1.22651
A0A7P0TA23	SEPSECS	17	0.9987	1.1757	1.03264	0.876958	1.00576	0.966863	1.26283	0.850462	1.03356	0.911335	0.827392	0.915587	0.973343	1.0786	0.953859	0.75327	1.20084	1.02551	0.98718	1.13507	0.920535	1.04705	1.03017	1.25485	0.927908	1.00238	1.1303	0.973959	1.17748	1.19595	1.33743	1.12928	1.02484	0.764805	0.924506
A0A7P0TA31	TUBA8	6	1	0.976404	1.32283	0.733425	0.886377	0.894872	1.08807	0.936001	0.843247	1.74793	0.926296	0.974537	0.931644	0.69914	0.581046	1.26666	0.783454	0.924686	0.696112	0.9456	0.892498	0.90323	0.459912	0.678169	0.751129	0.735838	0.536685	0.840781	0.398113	0.561085	0.759712	0.82158	0.733707	0.81846	0.736873
A0A7P0TAA6	VRK1	3	0.9999	1.09835	NA	NA	0.924326	1.04519	NA	1.16499	0.845709	NA	NA	NA	1.01251	NA	1.54071	1.11011	1.60811	1.19632	NA	NA	NA	1.0665	NA	NA	NA	1.17073	1.14875	NA	1.03433	NA	1.27738	NA	NA	1.49954	1.02882
A0A7P0TAG7	SLC1A3	175	1	1.03564	0.85095	1.24828	0.956815	1.03671	1.0432	1.42977	1.46779	1.22619	1.09572	1.1284	1.12786	1.07795	1.08386	1.04221	0.843471	0.641348	0.657538	0.901749	1.01071	0.901106	0.801268	0.841109	1.21168	0.912778	0.701146	0.963815	0.987463	0.883245	1.18655	1.28971	1.35664	1.01558	1.40431
A0A7P0TAR5	RALGAPA1	118	1	1.14445	0.973717	0.883473	0.981573	0.972454	1.00825	0.956576	1.02247	1.03734	0.937705	0.972716	1.02609	1.12315	1.05204	1.02047	1.02358	1.06597	1.10024	0.971081	1.03693	0.958037	1.04107	1.05269	1.0683	0.983206	1.00483	1.06961	1.08188	1.03683	1.11036	1.16022	1.2138	1.07322	1.05418
A0A7P0TB68	ACAD9	49	1	1.28931	1.0543	1.28266	1.0202	1.13305	0.976928	1.18513	1.29265	0.792457	0.719577	0.962994	0.808307	0.866381	0.815144	0.999985	1.25391	0.845593	0.996952	0.748352	1.18459	0.947668	1.19434	1.11628	0.970445	1.02992	0.992281	0.948878	1.01428	0.890795	1.23691	1.24409	0.998107	1.20074	1.12744
A0A7P0TBH9	DTNA	131	1	1.12964	1.00816	1.01423	0.969953	1.02285	0.984462	0.956705	1.04597	0.932015	1.04909	0.988654	0.995994	0.948128	1.03178	0.977174	1.03131	0.915204	0.886222	0.912748	0.840396	0.913746	0.907807	0.965156	0.88048	1.18451	0.989154	1.00829	1.07746	0.989578	0.996967	1.14993	0.969956	0.901524	1.01199
A0A7P0Z4C3	DCTN1	83	1	1.1332	0.967381	0.849641	1.13172	0.947813	0.90547	0.894312	1.09356	1.22632	1.03575	0.981677	1.0768	0.985991	0.846816	1.03484	0.884633	1.10403	1.14363	0.986638	1.03054	0.960347	0.996417	1.16882	0.921883	1.1222	0.978646	0.974937	0.95967	1.20384	1.41969	1.2983	1.23251	1.446	1.29016
A0A804CD06	PTPA	171	1	1.71765	1.04409	1.0116	1.11495	0.727079	0.71116	0.980273	1.02518	1.16558	0.885096	0.784603	1.13645	1.58558	1.56101	0.830071	1.47205	1.12115	0.80012	0.571989	0.503932	0.781167	0.911084	0.609067	0.936186	0.89972	1.02536	0.875506	0.751252	0.500068	0.557825	0.44648	0.456062	0.478113	0.508244
A0A804CJ50	CAMK2G	19	1	1.19235	1.07388	0.990735	1.23469	1.10446	1.03341	0.904713	0.942218	1.07147	0.916121	1.04713	1.01425	0.872023	0.907832	1.1606	0.983794	1.31507	1.0172	1.00352	0.797381	0.985072	0.906602	1.0917	0.971618	0.985295	1.10556	1.15487	0.835014	0.872187	0.869281	0.985125	0.901232	1.03487	1.16413
A0A804F6T5	PKM	164	1	1.63115	1.08144	1.34413	1.22746	1.23559	1.02532	1.22378	1.04376	0.976699	0.793394	0.951023	0.932769	1.13613	0.965329	0.992682	1.17026	0.864831	0.730308	0.900923	0.721675	0.815891	0.807346	0.852	0.817571	0.798539	0.915671	0.783179	0.662102	0.55555	0.841044	0.600488	0.4924	0.611943	0.604091
A0A804HHW7	TBCD	144	1	1.74836	1.03149	1.00753	0.99605	1.00444	0.878964	0.817416	0.963201	0.902911	0.966575	0.941861	0.970758	1.11087	1.23359	0.97288	1.1562	0.897639	1.07137	0.952498	0.84862	1.02153	0.888765	0.910479	0.95543	0.925466	1.02989	0.991208	0.922999	0.936753	1.11944	1.37527	1.2505	1.03228	1.17823
A0A804HHX0	BSCL2	76	1	0.775218	1.07545	0.880324	0.791858	0.920015	0.984288	1.14176	1.00592	1.00143	1.0587	1.19091	1.20073	0.924307	0.945881	1.21199	0.80598	0.996727	1.03757	1.16783	1.30451	1.01933	1.03093	1.17273	1.0467	0.825994	0.951257	0.927582	1.15356	0.947128	1.24104	1.06658	1.06182	0.878441	0.988315
A0A804HI01	SGIP1	16	1	1.04517	1.03376	1.1388	1.07725	0.941447	1.19087	1.34794	1.28708	1.13393	1.08741	1.18451	1.04473	1.09155	1.03635	1.15877	0.907251	1.12564	1.29125	0.990585	1.19052	1.02685	1.36291	1.42751	0.972029	1.12008	1.13507	1.26131	1.13684	1.35981	1.24647	1.34715	1.39611	1.37831	1.16624
A0A804HIF1	FGFR1	13	1	0.899336	0.921405	0.943154	0.872875	0.990874	0.814771	0.837763	1.05036	0.739483	1.1125	0.840882	1.00801	1.13888	0.840896	0.885092	0.94165	1.02831	0.997437	0.988733	1.18338	1.21184	1.04933	1.21306	1.29553	1.19657	1.0941	0.963699	0.909591	0.743805	1.10003	0.671916	0.935424	1.3119	1.06921
A0A804HIH4	GNAS	8	1	0.953404	0.987505	0.814325	0.986215	0.957202	1.08267	1.06247	1.06903	0.921	0.830632	0.932495	0.966515	0.941084	1.08357	1.10597	1.08116	0.988316	0.858929	1.03791	0.73916	0.902155	0.999783	0.832489	1.14464	0.942432	0.950589	1.01342	0.901134	0.859087	0.918051	0.885244	0.769518	0.788429	0.903296
A0A804HIT6	HYCC2	159	1	1.03538	1.09844	1.07978	0.924281	0.967115	1.04139	1.01389	1.00304	1.21101	1.07304	1.13383	1.12894	1.24147	1.01084	1.08648	0.923061	0.979598	0.913374	0.915101	1.04278	0.96432	0.958292	1.00434	1.04386	0.868595	0.849939	1.0434	0.881959	1.08811	1.03874	1.07665	1.22681	1.10367	1.14499
A0A804HJ37	RETREG1	8	0.9986	0.647217	1.04856	1.17874	0.971905	0.987304	0.938293	0.96601	0.92713	0.887323	2.11268	1.53399	0.832338	1.06889	0.920941	1.00126	0.836082	1.03605	1.15383	1.59719	1.16483	1.09156	1.29021	1.37281	0.855735	0.823021	0.949567	0.989891	0.934998	1.28294	1.22277	1.06509	1.06326	0.764313	1.11658
A0A804HJ61	SNX14	4	0.9999	0.715935	NA	NA	0.864137	1.02617	NA	1.0432	0.853108	NA	NA	NA	0.818073	NA	0.91552	0.960154	0.944448	0.87787	NA	NA	NA	1.31152	NA	NA	NA	0.937335	0.896485	NA	1.06887	NA	0.880826	NA	NA	0.802601	1.02665
A0A804HJ70	GLE1	9	0.9985	0.686686	1.13324	0.649277	0.877047	0.815282	0.766715	0.839607	0.965656	0.938859	1.07208	1.00865	0.844892	0.928912	0.830964	0.986864	0.733184	0.821687	1.33297	1.17104	1.11918	1.11442	1.32059	1.41537	1.26412	1.11421	0.983763	1.08033	1.10197	1.73474	1.78342	2.14795	3.63877	5.08919	3.97334
A0A804HJX8	HECTD4	157	1	1.22504	0.927567	0.898778	1.05598	1.02773	1.02374	0.945312	0.973706	0.94192	0.919455	0.926022	0.952521	0.966457	0.957713	0.957003	0.919977	1.03235	1.03938	1.0899	1.09011	1.02295	1.05534	1.11484	0.957377	0.973811	1.08386	1.07395	0.997398	1.18004	1.25743	1.40157	1.30331	1.30212	1.24471
A0A804HK86	MAN1B1	39	1	0.97095	0.960582	0.918374	0.845059	0.948038	0.887371	1.09659	0.92076	1.00581	0.877663	1.14915	0.962593	0.963859	1.12339	1.15545	1.12273	0.995616	1.02102	1.0664	0.959362	0.909087	0.982269	1.09255	0.935152	1.01075	1.15549	0.953432	1.18541	0.941707	0.999418	0.945019	0.935907	0.952431	1.00911
A0A804HKC4	CACNA1C	4	1	NA	1.18463	0.913511	NA	NA	1.05893	1.03956	0.892036	0.892459	0.961136	0.962874	NA	0.911655	0.804612	0.810852	NA	0.835	1.07745	1.24306	1.22723	NA	1.06798	1.17905	1.0879	NA	0.898397	1.18021	0.890008	1.13604	0.919466	1.18846	1.39192	NA	NA
A0A804HKD7	RABGAP1L	40	1	1.34899	0.956181	1.04661	1.0513	1.00194	1.04565	0.894049	0.813961	1.04675	0.950911	0.914183	0.986884	0.847537	0.880818	1.04021	0.950947	1.09475	1.1724	1.17166	1.01567	1.09383	1.17834	1.10959	0.931325	1.01999	1.18159	1.05728	0.944757	1.11877	1.04602	1.11631	1.08985	1.09808	1.03018
A0A804HKE7	MAP4	14	1	1.12189	1.29017	1.02982	0.932912	1.01273	0.94216	0.998339	1.05759	1.13735	0.84503	0.840062	1.08522	1.56886	1.17814	1.20722	0.992881	1.32669	0.526947	1.05249	1.03589	1.01133	0.565371	0.372573	1.24446	0.783122	1.35179	1.17144	1.46629	0.378377	1.67391	1.06348	0.469874	1.06883	0.870363
A0A804HKI2	LRPPRC	266	1	1.50834	0.87067	0.923501	0.914032	0.903553	0.856693	0.861447	0.977063	0.842651	0.938793	0.98174	0.916907	1.0395	1.21778	0.967603	1.17625	0.970501	1.05552	1.04121	0.862282	1.07784	1.0272	1.01232	1.00954	0.98995	1.20471	1.20682	1.09749	1.16282	1.32142	1.7626	1.38698	1.23446	1.33154
A0A804HKQ1	MYCBP2	98	1	1.04877	1.03353	0.916347	0.975056	0.999071	0.961251	0.946619	0.989213	1.10492	1.05016	1.07519	1.13302	1.10733	0.931749	1.02151	0.903936	1.09297	0.934879	1.08717	1.21136	1.19134	1.17055	1.34731	1.14361	1.06564	0.965588	1.02983	1.07196	1.30085	1.21403	1.04473	1.25211	1.33124	1.20033
A0A804HKX1	ANKS1B	76	1	1.34051	1.25778	1.09591	0.941489	0.999354	0.932502	0.93595	0.972609	1.04791	1.34888	1.10864	1.07013	1.12505	1.16375	1.16563	1.13997	1.03863	0.796387	0.91797	0.727613	0.784056	0.710309	0.773792	0.948955	0.584166	0.754004	0.975026	0.714041	0.701732	0.881875	0.873954	0.841229	0.67287	0.799391
A0A804HL01	ADD1	26	1	1.00271	1.04937	1.10539	0.817967	0.916605	1.04892	1.13482	1.10199	1.01808	0.853255	1.09938	1.01082	0.930787	0.930374	1.20403	0.826593	0.974542	0.904156	0.981512	0.994492	0.808146	0.992099	0.967572	0.993537	0.785445	0.981057	0.895161	0.948318	0.947209	0.961379	0.696304	1.01663	0.721643	0.677119
A0A804HL02	MCCC2	4	0.9998	1.25195	1.1322	1.1774	1.34049	1.57539	1.06819	NA	NA	0.933391	0.98803	1.11668	0.849756	0.891253	NA	NA	1.23172	NA	1.03274	0.702601	0.884351	1.78836	1.38446	1.2421	0.935232	1.83393	NA	0.643517	NA	1.02644	NA	0.923115	1.08433	1.31225	1.06255
A0A804HLB0	SLC25A25	187	1	1.09109	0.95946	1.18355	1.23353	1.11381	1.08206	1.04385	1.13854	0.907377	0.816682	0.88147	0.924643	1.05629	0.786924	0.879838	1.05419	0.9171	0.995887	0.986521	1.24068	0.94058	0.997848	1.10635	1.00334	0.873945	1.03512	1.02465	0.848167	0.878641	0.988965	0.982684	0.884107	0.970233	0.858528
A0A8C8KBL6	ITGA6	122	1	1.13839	1.01287	1.02553	1.05319	1.14246	0.980727	0.922236	0.950029	0.887073	0.96163	0.968617	0.965578	0.910798	0.908185	0.886574	0.98436	1.08535	0.984905	1.07384	1.09017	1.0124	1.06905	1.07673	0.948438	1.14738	1.22149	1.23999	1.18933	1.12222	1.13579	1.2058	1.09199	1.09879	1.17987
A0A8C8KD64	PAM	330	1	0.755241	1.06893	0.826605	0.867588	0.801761	1.10592	1.08571	0.884984	1.42223	1.18115	1.31316	1.31336	1.28367	1.03322	1.04551	0.849109	1.12685	0.802309	1.12213	0.805233	0.799565	0.894278	0.753712	1.01968	0.846306	0.90521	1.09807	0.762684	0.93217	0.881614	0.667278	0.814872	0.758668	0.849978
A0A8C8PZE2	C19orf12	24	1	0.741825	0.948869	1.00412	0.88833	0.76411	0.928915	0.937864	1.13877	1.11103	1.18157	0.942346	1.19952	0.996534	1.02053	0.92604	0.899846	1.08652	0.904856	1.04136	1.07136	1.13421	1.05549	1.00415	0.800737	0.899632	0.990727	1.04783	1.50145	0.922037	0.575879	0.880508	0.789588	0.694818	0.641136
A0A8C8QSB1	HLCS	29	1	0.619255	0.896415	0.882632	0.992436	0.924484	0.942675	0.911233	0.825852	0.813915	0.852878	0.856426	0.82587	1.0866	1.11604	0.941716	0.881877	0.921364	1.05148	0.99763	0.772122	1.10305	0.956506	1.0687	0.923726	0.875304	1.13102	1.06183	0.963095	1.03589	1.14466	1.11619	1.14332	1.16057	1.05885
A0A8I5KQ02	SBF2	58	1	0.909895	0.863207	0.819364	1.09023	0.913483	0.983776	0.923017	0.994089	0.898836	0.817027	0.993828	0.951653	0.891943	0.790516	0.95493	0.864421	1.17448	1.14224	0.982518	1.09488	1.27903	1.14662	1.33029	1.08663	1.31584	1.18182	1.05802	1.16741	1.3521	1.39355	1.47925	1.36476	1.35904	1.62631
A0A8I5KQ16	IFT122	7	1	0.794845	0.932824	0.852261	1.05959	0.973939	0.967862	1.25556	1.387	0.899609	0.77019	1.02505	0.894837	1.14123	1.08436	0.765901	0.97727	1.31012	1.141	1.05916	0.966725	1.10602	1.0517	1.16654	0.835075	0.94506	1.52226	0.833907	1.02354	1.17979	1.53533	0.757076	0.817343	0.831368	1.03859
A0A8I5KQ21	KRAS	72	1	1.12295	1.08355	1.10807	1.09686	1.10807	1.12626	1.13005	1.13274	1.06556	1.01392	1.03732	1.10034	1.15663	1.04274	1.01607	1.05144	1.03587	0.971935	0.954583	1.14773	0.898589	1.06893	0.945008	1.06628	1.005	0.881213	0.934257	0.890499	0.951363	0.975102	0.800073	0.85384	0.977759	0.880252
A0A8I5KQB8	REEP1	28	1	0.702702	0.980812	0.955455	0.848941	1.02661	0.937682	1.10494	1.05888	0.824939	0.997192	1.03797	1.16227	0.763394	0.880456	0.999445	1.04698	0.966612	1.01168	1.28277	1.31261	1.27121	1.26943	1.10801	1.18885	0.95394	0.966758	0.874642	1.32996	1.21101	1.20899	0.908215	1.32988	1.63398	1.09968
A0A8I5KQE6	RPSA2	1	0.9954	NA	0.975231	NA	NA	NA	1.24216	NA	NA	NA	NA	NA	NA	1.03699	NA	NA	NA	NA	NA	0.981094	1.20822	NA	NA	NA	1.11911	NA	NA	0.915892	NA	NA	NA	1.329	NA	NA	NA
A0A8I5KR47	NTRK2	36	1	1.08934	0.742122	1.14851	0.915484	1.11404	0.823922	0.988602	0.820676	0.841044	0.805977	0.982657	0.871645	1.12495	1.17048	1.14102	1.1085	1.04596	1.0531	0.945075	0.941952	1.02554	1.06071	0.823855	1.06974	1.04469	1.07858	0.796572	1.27486	0.965607	0.891533	1.10812	0.89411	0.7887	0.74011
A0A8I5KRC6	MACROH2A1	16	1	0.658891	1.03164	1.2796	0.957904	0.762378	1.39342	1.45485	1.11395	1.41686	1.0712	1.26573	1.3114	0.780116	1.22263	0.988039	1.06698	0.965906	0.615167	0.45164	0.49983	0.778617	0.971571	0.688512	0.727382	1.13964	0.734205	0.850048	0.669162	0.591526	0.649203	0.35669	0.575578	0.493714	0.445904
A0A8I5KRZ2	BCAS1	8	0.9993	0.777764	1.12884	1.09902	1.5746	2.02904	1.35736	1.75895	0.794614	0.524592	0.517204	1.03299	0.599457	0.751929	0.91605	0.95207	1.32116	0.437556	1.14502	0.798677	0.585948	0.954549	0.632304	0.752326	0.586385	0.657392	1.13092	0.509809	0.481575	0.423292	0.624123	0.416095	0.334044	0.484541	0.568884
A0A8I5KSF9	PTEN	24	1	1.00484	1.0119	1.13538	0.88923	0.965588	0.897937	0.822027	0.933946	0.909122	1.033	0.962121	0.934863	0.779004	0.929198	0.941989	1.0094	0.95733	0.94904	1.0628	0.931178	0.936229	0.882474	0.825034	0.85258	0.879666	0.824785	0.980963	0.881166	0.829806	1.04016	1.21072	1.54107	1.34955	1.18838
A0A8I5KT16	EIF4E2	2	0.9937	NA	0.936531	NA	NA	NA	0.641665	0.441951	0.845102	NA	NA	NA	NA	0.887019	0.74824	0.924047	NA	1.12414	NA	0.869728	0.528739	NA	NA	NA	0.642449	NA	1.06885	0.774621	0.820642	NA	0.790934	0.501115	NA	NA	NA
A0A8I5KT56	FMR1	79	1	1.33163	1.11235	0.907022	1.00943	1.15305	1.00244	0.825792	0.893454	1.38998	1.07577	1.06232	1.03769	0.879646	1.05703	1.08669	0.972011	1.03666	0.974416	0.868986	0.942603	0.76151	0.82786	0.896249	0.891754	0.898233	0.937635	0.950437	0.773529	0.911006	1.03067	1.19614	1.11879	1.00315	1.14801
A0A8I5KTN6	SLC22A5	8	1	0.818206	1.24808	1.03301	0.871294	0.92212	1.14845	1.02643	0.929318	1.03634	1.16046	1.25332	0.966685	1.21223	0.749717	1.16399	0.765449	0.572271	1.05665	1.3416	1.49758	1.2702	1.33813	1.24355	1.37408	1.1741	0.963873	1.37063	0.870719	1.08366	2.26057	2.13815	1.38517	2.63567	2.35862
A0A8I5KU76	ERP44	6	1	1.0523	0.918705	1.14347	0.850741	0.901493	0.877044	0.994921	0.960034	0.807431	0.970799	0.845823	0.914824	1.27747	0.906291	0.883259	1.17074	1.14919	1.18015	0.792762	1.18	1.26418	1.39892	1.14108	1.25195	1.45256	1.21747	0.908273	1.5934	1.04852	0.883735	0.860354	0.68534	0.959371	0.874094
A0A8I5KUN3	BCAS1	8	1	1.10302	1.31704	1.41136	1.15021	1.07795	1.20432	0.882142	0.84673	0.778834	0.806402	1.02998	0.963302	0.995356	0.912816	1.06011	1.14506	0.73068	0.779142	0.824442	0.826124	0.828771	0.878326	0.777011	0.908433	0.934392	0.929615	0.99194	0.871079	0.801991	0.641324	1.07904	0.91501	0.52161	0.708108
A0A8I5KUZ1	NTRK2	1	1	NA	1.27505	NA	NA	NA	0.981797	NA	NA	NA	NA	NA	NA	1.12126	NA	NA	NA	NA	NA	0.72667	0.819093	NA	NA	NA	0.886976	NA	NA	1.06846	NA	NA	NA	0.604691	NA	NA	NA
A0A8I5KV92	EIF4G3	228	1	1.29568	1.09049	0.986765	1.0552	1.10849	0.913697	0.991172	0.981878	0.981934	0.979897	0.937438	1.10625	1.0628	0.957802	1.04988	1.17573	1.037	0.976493	0.926402	0.926678	0.95973	0.927316	0.926984	0.978237	0.897615	1.02322	0.985256	1.0043	0.896058	0.979958	1.03156	0.983421	1.01375	0.964861
A0A8I5KVE0	PHACTR1	3	0.9971	1.47735	NA	0.803916	1.27949	1.36663	NA	1.13314	1.04565	1.18272	0.772797	1.06409	1.16135	NA	1.4241	1.1455	1.06801	1.32301	0.85913	NA	NA	1.59327	0.889301	1.13968	NA	1.02968	1.18383	NA	1.40186	0.714755	1.21389	NA	0.586178	1.15436	0.82476
A0A8I5KVU2	LARP4B	18	1	0.97968	1.02822	0.858093	1.05771	1.12869	1.08463	0.803969	0.983017	0.91068	0.879383	0.883858	0.969992	0.877054	0.769232	1.04881	0.886661	0.981319	1.03074	0.976674	1.17134	0.89355	0.903727	1.08567	0.536804	0.873032	0.975075	0.721594	1.07572	0.995558	1.39597	1.07552	1.24599	1.11924	1.06497
A0A8I5KW61		32	1	0.650832	1.58522	0.768378	1.13522	0.914825	1.1567	0.588191	0.51991	1.46712	0.971067	0.761786	0.922691	0.991999	0.896346	1.36113	1.04446	0.786337	1.16941	1.10804	1.29195	0.814688	1.36343	1.12217	1.02951	0.808585	0.905601	0.930525	1.44489	0.958069	1.30476	1.1592	1.40333	1.70234	1.1383
A0A8I5KWF3	PLPPR2	9	1	1.57892	1.02811	0.845468	1.05063	0.887313	0.695427	0.860484	0.655717	0.890719	0.77457	0.918481	1.03341	0.998553	0.913442	0.748062	0.71722	0.912094	0.982237	0.4141	1.05381	0.720913	1.03109	1.03317	0.321734	0.937433	0.92512	0.936803	0.974626	1.22727	0.927327	1.03739	1.40233	0.879974	0.963174
A0A8I5KWQ7		32	1	1.13933	1.11703	0.944058	0.832558	0.984913	0.712353	2.85822	0.964906	0.7219	0.851032	0.935909	0.73707	0.843127	0.8984	0.917964	0.997765	0.843824	0.954707	1.1435	0.919423	0.849027	0.743609	0.72443	0.857996	0.787042	1.10958	0.948996	0.943412	0.782824	1.06587	0.811241	0.726717	0.665003	0.874507
A0A8I5KWT8	MYH9	548	1	1.39446	0.915387	1.64962	0.999907	0.996992	1.00822	0.871842	1.05648	0.868883	0.921878	0.892791	0.871044	0.846761	0.900665	0.906403	0.957602	0.871639	0.921449	1.01484	0.996098	1.11038	1.15083	0.955042	0.987346	1.12119	0.987455	1.03477	1.13764	1.09083	1.48303	1.56574	1.30151	1.2651	1.29792
A0A8I5KXK1	USP19	53	1	0.985666	1.05411	1.15476	1.0239	0.940262	0.956253	0.963063	0.899937	1.00585	1.01334	1.08406	1.07882	1.13288	0.957782	0.991302	0.986128	0.939087	0.986893	1.02041	1.13584	1.09202	1.04546	1.02537	1.15022	0.916981	0.951938	1.07299	1.0354	1.23997	0.885693	1.23181	1.01738	1.05739	1.05973
A0A8I5KXP5	C1orf167	7	0.9956	1.10932	1.02252	0.902944	1.19073	1.37182	1.24719	0.989543	1.04314	1.18932	1.05745	1.07989	1.01376	0.853703	0.845796	1.12295	0.915574	0.944931	1.14232	1.08773	1.1745	0.927715	0.963643	1.0063	0.964607	1.12496	1.17237	1.09311	1.06748	1.11239	1.12326	1.26134	1.26209	1.27957	1.11085
A0A8I5KXR5	TANC2	91	1	0.93788	0.986628	0.970789	0.937811	1.00595	1.03499	0.882202	0.948987	1.01406	0.978451	1.05626	1.02586	1.16526	0.977331	0.988082	0.930924	1.15208	0.959927	1.19773	1.2108	1.16274	1.121	1.1916	1.15875	1.0299	1.10754	1.03723	1.24213	1.00189	1.21876	1.14684	1.12429	1.21203	1.14694
A0A8I5KXW5	RGS7	150	1	1.80245	1.19472	1.36726	0.97249	1.0918	0.884802	1.0264	0.941767	1.05853	0.977573	0.986761	1.02062	1.04703	1.11329	1.19348	1.29521	0.924935	0.846683	0.812115	0.742095	0.72203	0.630556	0.580166	0.878508	0.701139	0.746166	0.88748	0.645831	0.608524	0.759554	0.729473	0.777304	0.802417	0.710371
A0A8I5KYA1	MYLK	2	1	NA	1.08898	1.01216	NA	NA	1.43768	NA	NA	0.876993	0.99527	0.838763	NA	0.930782	NA	NA	NA	NA	0.740593	1.04505	1.01782	NA	0.935572	0.837138	1.33334	NA	NA	1.59706	NA	0.914033	NA	1.15589	0.896979	NA	NA
A0A8I5KYG1	ELOC	1	0.9984	0.865041	NA	NA	1.18081	0.993967	NA	NA	NA	NA	NA	NA	0.746543	NA	NA	NA	0.861715	NA	NA	NA	NA	1.31113	NA	NA	NA	1.38109	NA	NA	NA	NA	NA	NA	NA	1.42787	1.35962
A0A8I5KZ38	MYH10	349	1	1.29671	0.98015	1.00302	1.03789	1.0096	1.11351	0.910317	1.02216	1.00266	0.969576	1.01826	0.954048	0.965133	0.961069	1.06942	0.932911	0.920152	0.955334	1.08908	0.985973	1.01347	1.0108	1.02219	0.956763	0.943855	0.9615	1.07396	1.01185	1.16532	1.44679	1.39877	1.40104	1.2184	1.41474
A0A8I5KZ40	RAPGEF2	297	1	1.18351	0.999478	0.949826	1.04562	0.949619	0.97055	0.922404	0.98612	1.03897	0.908023	0.954633	1.03431	1.12362	1.05823	1.02032	0.999997	1.12495	1.00069	0.986985	0.969468	1.06069	0.986621	0.98023	1.01354	1.00401	0.981301	1.01318	0.951327	0.987558	1.04943	1.15978	1.05296	1.04119	1.1569
A0A8I5QJ71	SHF	18	1	0.827816	1.00544	0.967908	0.980456	0.769031	0.785837	1.17483	1.31276	1.15051	1.33463	1.16148	1.65982	1.20676	1.10647	0.920116	0.816615	1.06682	0.657112	0.928816	1.02272	1.28612	1.1394	0.961036	1.04904	0.90155	0.950007	0.980619	1.1324	0.761111	0.948237	0.916936	1.11254	1.05011	0.764215
A0A8I5QJU8	RIMBP2	74	1	1.0729	0.981565	0.885648	1.034	1.04902	1.051	0.977066	0.97275	1.0117	0.997029	1.03013	1.09779	1.09875	0.991728	1.07091	1.02399	0.976606	0.840399	0.989321	0.975947	1.15967	1.02796	1.11989	0.999438	1.05715	0.875668	1.04935	0.955106	1.12831	1.03639	1.1023	1.16212	1.15634	1.17947
A0A8I5QKV3	ATE1	23	1	1.31064	1.05584	1.12524	1.01745	0.911327	0.767848	0.843688	0.972503	0.855974	0.991693	1.04478	1.12907	0.938066	1.32931	1.12062	1.16073	0.762711	0.738544	0.754147	0.901553	0.91832	0.90212	0.821984	0.955055	0.873349	0.799283	0.926412	0.759811	0.715695	0.927744	1.08272	0.818462	0.75128	1.00674
A0A8J8YWI7	MYO5A	523	1	1.79111	0.945036	1.04106	1.0391	1.01403	0.930798	0.860162	0.946135	0.98844	0.888178	0.933832	0.952312	1.01011	0.962098	0.988331	0.9752	0.990292	1.00363	0.974699	1.01905	0.954115	0.924045	0.961733	0.974179	0.92226	0.939519	1.06643	0.901006	0.978488	1.36399	1.35452	1.41638	1.314	1.20014
A0A8J8YWN6	CYB5R3	200	1	1.14165	1.07094	0.994492	1.18236	1.0824	1.14277	1.01857	1.16089	1.01684	0.954704	0.986647	0.953478	0.953955	0.857473	0.896073	1.05601	0.900465	0.799054	0.727065	0.910897	0.864867	0.903356	0.899631	0.855216	1.48341	0.822101	0.857701	0.715857	1.00058	0.920903	0.913644	0.980863	1.02581	0.836896
A0A8Q3SHY2	NTRK3	6	1	NA	1.08764	1.00907	NA	NA	1.04742	1.10867	0.951599	0.965459	0.978872	0.989278	NA	1.00406	0.924034	0.958182	NA	1.09512	1.24235	1.02561	1.08053	NA	1.21963	1.16744	1.02654	NA	1.14733	1.10988	1.1449	1.23858	1.10194	1.31467	1.07172	NA	NA
A0A8Q3SIA1		39	1	0.891246	1.0688	1.5088	0.918229	1.01442	1.16517	0.875135	0.957639	1.06715	0.984694	0.91229	0.971537	0.905558	0.818469	0.866671	0.961717	0.987479	0.93471	1.17626	0.912546	1.07664	1.19508	1.07734	0.933201	0.950565	0.880617	1.19068	1.38854	0.959266	1.06136	0.937604	1.10575	1.09485	1.04669
A0A8Q3SID6	C5	16	1	0.878064	1.04068	0.995798	0.808263	0.758965	1.23782	1.00435	1.24055	0.924694	0.716229	0.817704	1.09261	0.940361	0.893683	1.19129	0.894029	0.766488	1.05236	1.17113	1.05782	1.10179	1.35293	1.16264	0.980978	0.804361	1.09285	1.07675	1.10266	1.05754	1.1872	1.29831	1.35788	1.93862	1.45142
A0A8Q3SIN7	VANGL2	15	1	1.08568	1.07876	0.93487	1.35962	1.06694	1.06657	0.87643	0.832172	0.957844	1.14997	1.20052	1.06473	0.912261	0.831331	1.04502	0.938461	1.08565	1.37299	1.06105	1.04559	1.1371	0.823195	1.2699	0.821243	1.41814	1.30913	0.988837	1.03105	1.12619	1.06232	1.13494	0.469534	1.61209	1.36549
A0A8Q3SIT1	RUSC1	6	0.9998	0.559402	0.749436	0.916835	1.0014	0.954366	0.857499	0.641763	0.837815	0.745715	0.788921	0.931631	0.892381	0.879607	0.597897	0.548719	0.854375	0.616059	1.08022	0.884082	0.630095	1.28565	1.24297	1.11324	0.784163	1.29921	0.732516	1.00525	0.704086	0.91377	0.847086	1.16199	0.968679	1.48098	1.37138
A0A8Q3SIU1	RASAL2	63	1	1.15256	0.984108	0.868417	0.877999	0.973185	0.902901	0.919686	0.944568	1.06389	1.05136	1.03396	0.959379	0.936668	0.978395	1.11176	0.867244	1.03878	1.05131	1.0719	0.912875	0.921812	0.925702	0.935486	0.897275	0.968976	0.991152	1.04463	0.905253	0.988925	1.15039	1.11447	1.07617	1.17713	1.13898
A0A8Q3WKK6	LIMS1	7	0.9999	1.4815	1.05645	0.978069	1.04951	1.05902	0.904828	0.971952	1.18629	1.03838	1.05004	0.863137	0.956344	0.803885	0.9044	0.84529	1.05409	1.37262	0.846249	0.850363	0.866255	1.29513	1.27753	1.15946	0.882987	1.0274	1.19469	1.20428	1.34429	1.11325	1.49741	1.75127	1.68564	1.21498	1.17639
A0A8Q3WKR3	PPP2R5C	97	1	1.44187	1.10142	1.09652	1.05911	1.05855	1.0262	0.967074	1.01292	0.891194	0.884821	0.989939	1.03238	1.05038	1.02101	1.09364	1.05802	0.927772	0.770227	1.01258	0.932266	0.841257	0.822824	0.969382	0.921612	0.924195	0.897924	0.93036	0.915194	0.870209	1.01952	1.03322	0.844975	0.932096	0.866274
A0A8Q3WKY0	CARMIL2	12	0.9987	0.798788	1.31587	1.18345	0.883367	0.962202	1.26881	1.14773	0.822988	1.15902	1.25374	1.18222	0.92321	1.25246	1.04282	1.12235	1.10463	0.985242	0.877515	1.20086	0.731946	0.794296	0.755188	0.730361	0.946258	0.653801	0.757712	1.01529	0.643704	0.912224	0.726856	0.656097	0.919147	0.820471	0.914502
A0A8Q3WLM4	PTK2	169	1	1.31458	1.15239	1.02527	1.08749	1.02828	0.992625	0.882992	0.93155	0.904448	0.893256	1.03669	1.03691	1.06697	0.989293	1.06846	0.988486	1.045	0.922693	0.998073	0.96094	0.924592	0.957215	0.968655	0.961036	0.917221	1.0077	1.07094	0.915508	0.971534	1.013	1.07041	0.946628	0.923803	0.981861
A0A8V8TKI1	NECTIN1	8	1	0.865804	1.10004	1.04024	0.982896	0.947234	1.08562	0.879854	0.923624	0.9515	0.918412	0.950251	0.941475	1.05363	0.917307	0.913714	0.840855	1.01564	1.15689	1.0349	1.30187	1.02555	1.17114	1.13929	1.03016	0.995212	0.841187	1.13084	1.04521	1.23697	1.0686	1.46357	1.51061	0.958213	1.01033
A0A8V8TKL0	KIAA0319L	48	1	1.05531	0.975011	0.971176	0.993716	1.18978	0.996147	1.06275	0.981727	1.17528	1.03271	1.11372	1.08852	0.961853	0.929964	1.01366	0.929555	1.01279	1.08051	1.01524	1.06737	1.02244	1.04839	0.93292	0.988303	0.968415	0.90867	1.03986	1.09381	0.977908	1.04592	1.07817	1.14899	0.979579	1.03438
A0A8V8TKT3	CSNK1G3	2	0.9999	1.31039	NA	NA	1.10621	0.759808	NA	0.778956	0.990703	NA	NA	NA	0.919981	NA	0.858705	0.911168	1.37598	0.942742	NA	NA	NA	1.01456	NA	NA	NA	0.828353	0.766595	NA	0.885957	NA	0.553114	NA	NA	0.635439	0.990383
A0A8V8TKT5	STK39	100	1	1.11031	1.21677	1.04653	1.08696	1.17694	0.989115	1.07525	1.01459	0.947722	1.02399	1.08819	0.951568	0.902529	0.961605	1.0635	1.21699	0.941076	1.17328	0.998965	0.790615	0.926896	0.823727	0.870657	0.985731	0.854198	0.98132	0.929648	0.831432	0.772048	0.815547	0.924453	0.727723	0.815551	0.777455
A0A8V8TL47	PALD1	16	1	0.830216	0.945769	0.933707	0.993145	0.779754	1.03433	0.813948	0.8139	1.10114	1.3453	1.17426	0.868156	1.03921	1.08399	0.807148	0.830507	0.971207	1.30936	1.34771	0.81102	1.46627	1.64415	1.44366	1.15223	1.15172	0.81044	1.25735	1.19665	1.60849	1.03284	1.56441	1.64412	1.38746	1.35599
A0A8V8TLD7	DOCK10	3	0.9991	1.04129	0.960327	NA	1.03412	0.969395	0.951446	1.21065	0.885328	NA	NA	NA	0.87633	0.780728	1.04926	1.16037	0.894802	0.890763	NA	1.34903	0.807831	0.929502	NA	NA	0.914201	0.88091	1.09185	0.942924	0.837579	NA	1.39365	1.61378	NA	1.50727	1.72876
A0A8V8TLT5	PSEN1	23	1	0.702967	1.07684	0.985732	0.755998	0.827851	0.87846	1.40489	1.45033	0.843817	1.09974	0.944144	1.30765	0.758732	1.04069	1.33456	0.843448	0.887435	1.08571	1.02945	0.789669	1.08318	1.14417	0.962303	1.20973	0.909661	1.04128	0.860558	1.16413	0.870811	1.13277	0.723806	1.06129	0.977864	0.917666
A0A8V8TLU4	SORBS2	1	0.9969	NA	2.67532	NA	NA	NA	1.25012	NA	NA	NA	NA	NA	NA	1.20106	NA	NA	NA	NA	NA	1.09864	1.59082	NA	NA	NA	1.47785	NA	NA	2.5299	NA	NA	NA	1.20809	NA	NA	NA
A0A8V8TLX7	LRRFIP1	58	1	1.37379	1.09228	1.00544	0.972917	0.962423	0.96826	0.966148	1.03736	0.971432	0.948962	0.983163	1.07006	0.996798	0.969112	1.09838	0.953405	1.00883	0.981424	1.10679	0.950089	1.05087	1.00631	0.953379	1.02328	0.939199	1.03649	1.03478	0.913289	0.91332	1.00108	1.16145	0.960295	1.04353	0.979069
A0A8V8TM76	TAP1	13	0.9961	0.850831	0.938658	1.11677	0.864174	0.845043	1.11742	1.19552	0.986176	0.970889	1.11648	0.96223	0.789727	0.965502	0.939241	0.940828	0.979184	1.04153	1.20706	0.987979	1.10573	1.15488	1.24535	1.27701	1.16541	1.14868	1.17371	1.29587	1.1419	2.02504	1.16297	1.36657	1.79676	1.51567	1.58855
A0A8V8TMC7	SORBS2	9	1	0.788216	1.04343	0.962419	0.989383	1.0418	1.37323	0.955689	0.876023	1.06809	1.0579	1.14743	0.967041	0.993446	1.0408	0.985336	0.963161	1.03777	1.39858	1.26792	1.3425	1.27197	1.21857	1.22782	1.22485	1.2892	1.18912	1.01601	1.15495	1.30254	1.2896	1.24114	1.2642	1.18677	1.26677
A0A8V8TMC8	STIM2	8	1	0.904234	0.701528	0.938313	0.902554	1.00554	0.804437	0.830751	0.779837	0.800376	0.925277	0.732783	0.945839	0.824739	0.744046	0.825344	0.865949	0.854327	0.732551	0.904125	0.892459	0.970214	0.848964	0.838089	0.811163	0.886863	0.814883	0.847728	0.798951	0.712313	1.06023	1.40832	1.17406	1.07676	0.91653
A0A8V8TMH5	MAP3K5	38	1	0.919891	1.05222	0.975982	0.966267	0.971062	0.978187	1.10083	1.0039	0.823478	0.999139	1.055	0.982551	0.964908	0.774879	1.0932	0.848138	0.905687	1.00208	1.00779	1.05051	1.10575	1.03599	1.09793	1.07716	1.04462	0.90972	1.14363	1.3137	1.15593	1.0207	1.58994	1.15416	1.56713	1.48022
A0A8V8TMH9	ARHGEF1	25	1	0.713849	0.913084	0.873006	0.892596	1.02698	1.32461	0.971261	1.04965	0.953509	0.820208	1.01437	0.839224	0.771085	0.894405	0.958373	1.08963	0.938703	1.22031	1.15217	0.851099	1.10623	1.23897	1.01309	1.18448	1.26094	1.14737	1.08315	1.19339	1.20386	1.15989	1.43726	1.6572	1.51318	1.50767
A0A8V8TMP7	CYRIB	219	1	1.48106	1.12924	1.33619	1.12953	1.09977	1.12825	1.0042	1.10088	1.09645	0.922314	0.974514	0.939906	1.0935	1.11408	0.978009	1.24061	0.89033	0.923326	0.826317	0.755638	0.706048	0.802514	0.633186	0.921174	0.863769	0.840398	0.817189	0.728922	0.550629	0.716209	0.640681	0.564564	0.669192	0.582315
A0A8V8TMQ1	FXR1	116	1	1.16774	1.0848	0.851432	1.04286	1.18142	1.02278	0.920775	0.942209	1.06952	1.07761	1.01486	1.01816	0.805181	0.879691	1.0011	0.918485	0.963309	0.996782	1.03766	1.1074	0.991495	1.01982	1.18144	0.933983	1.05122	0.972137	1.07137	0.924116	1.1923	1.16775	1.22853	1.31919	1.31979	1.33705
A0A8V8TMX2	LRRFIP1	14	1	1.20478	1.12961	0.940766	0.948534	0.793423	0.870037	0.92989	1.06785	1.14866	1.04498	1.15865	1.04106	1.22047	0.950586	0.994948	0.897124	1.10861	1.09259	0.838299	0.86554	0.796426	0.752673	0.811922	0.894202	0.698682	0.774509	0.955871	0.869116	0.92031	0.827343	0.711156	0.845757	0.503872	0.709522
A0A8V8TNA1	CAMK2D	4	0.9994	0.805619	0.839113	0.595597	1.13703	1.13622	1.09739	1.34155	1.15661	0.996765	0.999298	1.0573	0.904724	0.890433	0.800611	0.949498	0.723508	0.98618	1.0047	1.06678	1.52337	1.44658	1.49238	1.5928	1.29923	1.1054	1.10831	0.826141	1.26046	1.10546	2.04179	1.32553	1.52987	1.42306	1.69289
A0A8V8TNI1	PTN	3	0.9997	1.06495	2.15875	NA	0.956582	0.872838	1.35754	1.19153	0.603108	NA	NA	NA	1.11989	1.51371	1.22521	1.38051	0.736158	0.700737	NA	0.705608	1.14332	0.898433	NA	NA	0.916283	0.654734	0.763327	0.805464	0.788805	NA	1.45362	0.761433	NA	0.885084	1.20608
A0A8V8TNL0	SH3KBP1	15	1	0.870985	0.905626	0.912785	0.974872	1.30922	1.12971	1.04889	0.973749	0.835005	0.813214	1.00046	0.910396	1.04156	0.83535	1.06112	1.13427	1.09812	1.13773	1.23345	1.08565	0.985457	1.04941	1.00117	1.01735	0.83409	1.33414	1.03118	1.08267	0.969578	1.31794	0.977525	0.727785	1.13516	1.07644
A0A8V8TNZ5	ARF1	242	1	0.966768	1.0997	1.03368	1.01537	0.847744	1.02638	1.00063	1.09103	1.20267	1.07703	1.08276	1.16117	1.22552	1.16291	1.09434	1.07827	1.1652	0.91568	0.795269	0.80229	0.761736	0.806351	0.686711	1.02905	0.890832	0.853813	0.862499	0.81945	0.792583	0.715202	0.500838	0.673851	0.639361	0.805063
A0A8V8TP27	SH3KBP1	230	1	1.05826	1.06245	0.969954	1.04198	1.09098	1.0751	0.981072	0.9571	0.984104	0.999381	0.995293	1.01862	1.10087	0.898648	1.01509	1.02366	0.961989	1.07121	1.00674	1.01259	1.03724	0.970749	1.02304	0.99955	0.940782	1.01369	0.999426	0.948748	1.0018	1.10118	0.9038	0.900309	1.05966	0.979296
A0A8V8TP51	PTPRJ	61	1	0.971413	0.984984	0.977386	0.946711	1.13035	1.01211	0.943805	0.905068	0.969738	0.894746	0.970597	0.999649	0.96876	1.07927	1.02107	1.0697	1.07581	0.922414	1.05371	1.12299	1.01091	0.938346	1.09207	0.987548	1.1303	0.989515	1.04879	1.3512	1.22333	1.26973	1.08811	1.14137	1.2117	1.02956
A0A8V8TP99	ARF1	8	0.9992	0.945983	0.832082	0.666636	1.01692	0.862574	0.975315	0.686795	1.04307	1.30332	1.25766	0.94818	0.965413	1.10963	1.25181	0.718118	0.994646	1.06016	1.27426	2.56793	2.07137	1.14091	0.927974	0.848292	1.29084	0.897272	0.9789	1.62204	1.01065	0.867016	0.681037	1.98926	1.45477	0.843212	1.05105
A0A8V8TPI8	GOLGA4	2	0.9995	NA	NA	1.27957	NA	NA	NA	NA	NA	1.24062	1.76357	1.24037	NA	NA	NA	NA	NA	NA	2.2082	NA	NA	NA	1.42994	2.23864	NA	NA	NA	NA	NA	1.37949	NA	NA	1.85102	NA	NA
A0A8V8TPK8	NOP10	14	0.9998	0.743903	0.981435	0.898956	0.919832	0.955585	1.18664	0.997323	0.905873	1.33557	1.41023	1.21311	1.15508	0.879103	0.956465	0.909179	0.972329	1.16636	1.2827	1.03583	0.937051	1.022	1.10316	1.10878	1.11134	1.02347	0.984109	0.937436	1.02254	0.983674	1.07673	1.17582	1.13313	1.347	1.26827
A0A8V8TPN2	CAMK2G	137	1	1.04841	1.15336	0.981731	1.08275	1.21724	1.04745	0.893363	0.983089	1.22871	1.05492	1.00725	0.980964	0.938243	0.736024	1.09201	0.889297	1.03823	1.24325	0.852522	1.1161	0.976641	0.968017	0.950632	0.948016	0.954755	0.967901	1.06287	0.91036	0.757145	0.990093	0.725927	0.804559	1.01265	0.987909
A0A8V8TQ31	WHRN	13	1	0.960145	0.796958	0.920159	0.973166	0.913182	1.28861	0.629687	0.68171	0.775926	0.824932	0.922098	0.853524	1.05199	0.547257	0.88868	0.648813	0.661888	0.737341	1.01142	0.751241	0.917914	1.00894	0.796053	1.19491	0.883736	0.663433	1.08126	0.605142	1.05719	0.779571	1.09779	1.25864	1.39528	1.13701
A0A8V8TQG7	NFIA	53	1	0.935841	0.89129	0.934288	1.03745	1.21476	1.15255	0.972642	0.817056	0.969224	1.06322	1.02194	1.04052	0.94025	0.924281	0.995305	0.965302	1.13932	1.106	1.07991	1.0803	1.07306	1.05331	1.19548	1.0266	1.08099	1.04994	1.18351	0.960465	1.1837	1.21643	1.24598	1.05914	1.16237	1.23235
A0A8V8TQW4	AP3D1	271	1	1.56072	1.10367	1.08286	1.12318	0.98703	0.886023	0.933838	1.05159	1.06542	0.918674	0.936823	1.06872	1.10904	1.06855	0.99508	1.10137	0.97998	0.779711	0.888481	0.898664	0.952774	0.859303	0.837903	0.910442	0.779936	0.853299	0.903879	0.878817	0.815214	1.00381	1.07946	0.940709	0.884566	0.87278
A0A8V8TR21	NUP98	65	1	0.935358	1.0268	0.939555	0.959802	1.06901	1.11249	0.976326	1.00805	1.10858	1.16313	1.07033	1.09029	0.924809	0.937475	1.00412	0.936057	1.10062	1.07744	1.0916	1.15097	1.07475	1.0251	0.911855	1.09703	1.01647	0.995415	1.07875	0.932559	0.984342	0.996098	1.04048	1.01486	1.07944	1.16475
A0A8V8TR34	OS9	86	1	1.06776	0.940163	1.02426	0.939405	1.04471	1.05206	0.984122	0.900138	0.956294	1.03216	1.06891	0.939418	0.945195	0.999918	0.959172	1.08197	1.00564	1.11811	1.11113	1.26748	1.06143	1.17087	1.19797	1.05468	1.15088	1.09503	1.03052	1.00159	1.29983	1.14321	1.17502	1.29959	1.24169	1.11633
A0A8V8TRE2	CARMIL1	103	1	1.02346	0.988156	1.01642	0.880879	1.23423	1.17803	1.07509	1.0999	1.03224	1.10372	1.15086	1.10308	0.968838	0.84626	1.10846	0.878182	0.948251	1.05647	1.20104	1.24683	1.02155	1.14902	1.03271	1.08195	1.05155	0.910429	0.910091	1.15082	1.10016	1.02219	1.0003	1.22944	1.00776	0.932481
A0A8V8TRF6	CLASP1	345	1	1.33104	1.06136	0.98465	1.06308	0.985868	0.933945	0.9231	0.984456	1.01658	0.904978	0.93259	1.03016	1.12639	0.933355	1.00163	0.965929	1.0774	1.08395	1.02072	0.96126	0.925779	0.878534	0.936417	0.934834	0.854593	1.05966	1.02222	0.889552	0.880665	1.00009	0.97558	0.990256	0.945613	1.05105
A0A8V8TRH9	PPP1CB	182	1	1.50124	1.22514	1.17453	1.09564	0.962716	0.871927	1.02344	0.957771	1.09452	0.979396	0.936341	1.0659	1.23445	1.37048	0.954523	1.16894	0.982144	0.813702	0.680953	0.67256	0.68574	0.748973	0.720315	0.926685	0.750074	0.837159	0.804934	0.693575	0.535375	0.639743	0.687081	0.696059	0.531841	0.571818
A0A994J3S1	GPAA1	47	1	0.916465	0.817193	0.941035	0.942341	1.09323	1.09077	1.09761	1.10441	0.976067	1.01624	1.07819	0.925615	1.00985	1.0979	0.976119	1.04232	0.952273	1.22631	1.3258	1.37753	1.24663	1.32966	1.24932	1.17131	1.18157	1.02934	1.03057	1.21214	1.3033	1.33871	1.31601	1.69256	1.52842	1.4298
A0A994J426	DPF2	12	1	0.981953	1.37305	1.0316	1.0323	0.930528	1.60724	1.11555	1.0848	1.15905	1.27643	1.34016	1.13543	0.944676	0.917045	1.06724	1.03631	1.00493	1.32567	1.47912	1.40224	1.24167	1.20848	0.91491	1.20998	0.721033	0.91223	1.75755	0.963431	1.24874	1.02908	1.5609	1.26933	1.725	0.978549
A0A994J436	GRIPAP1	158	1	1.38041	1.07062	1.04388	0.970881	0.97913	0.933558	0.920351	1.05134	0.940179	1.01831	0.943817	0.984513	0.97451	0.938975	1.03643	0.927046	1.02052	0.926239	1.01538	0.964352	1.02171	0.990258	0.927081	0.989569	0.934563	0.952292	1.0272	0.964066	1.04875	1.14911	1.24156	1.20139	1.00629	1.05803
A0A994J483	HUWE1	7	1	1.95065	1.81623	1.48683	1.34154	1.36959	1.14114	1.07608	1.74381	0.839634	0.797249	0.673998	0.93476	1.31465	0.978766	0.695754	1.15534	0.888718	0.878814	0.98151	0.629471	0.861302	0.724672	0.617827	1.22701	0.917633	1.62289	1.11046	1.13339	0.72631	NA	0.952552	0.737496	1.16958	0.842438
A0A994J489	GRIPAP1	8	1	1.28171	1.24955	1.14782	1.11699	1.09737	0.819673	0.925252	1.1984	0.996614	1.00574	0.883737	1.27671	1.22594	0.943785	0.862235	0.955062	1.01025	0.962219	1.08275	1.30429	1.22923	1.07265	1.00065	0.990321	1.03566	1.10947	1.07759	1.03241	1.12147	0.968128	1.08992	0.770289	1.08324	1.04689
A0A994J4E9	HNRNPK	351	1	1.03422	1.03862	0.945016	0.827542	0.925078	0.962596	0.971828	0.927019	1.10143	1.09652	1.04639	1.10581	0.972274	1.32855	1.15969	1.08894	1.10586	0.920359	0.760813	0.709093	0.659236	0.64821	0.649213	0.935218	0.75063	0.874695	1.10062	0.692436	0.771446	0.757811	0.713623	0.729	0.768266	0.791432
A0A994J4G5	SPTAN1	18	1	2.67935	1.24464	1.0108	1.04412	0.907397	0.999086	0.571923	0.883509	0.829507	0.706423	0.9922	0.895722	0.8473	0.711675	0.944513	0.984322	1.25718	0.877331	0.870762	0.584742	0.706788	0.770926	0.803927	0.77811	0.883808	1.29745	1.0978	0.661821	0.903103	0.591064	0.638317	0.609572	0.693077	0.79273
A0A994J4I1	HEPACAM	8	1	0.78628	0.941547	0.773564	0.814532	1.2415	1.34773	1.06307	0.585318	1.24007	1.52478	1.15563	1.17565	0.895908	1.01782	0.996151	0.955856	0.690106	0.766408	1.17847	0.922688	1.12732	0.90612	0.749495	1.01199	1.02022	0.830781	1.01553	1.21033	0.981755	1.06386	1.13891	1.49255	1.11114	1.3173
A0A994J4I5	NCKAP1	461	1	1.95027	1.18817	1.1244	1.09763	1.09049	1.06873	0.835571	0.884	0.796346	0.804071	1.06917	0.917776	0.947694	0.921379	1.05908	0.933828	0.872302	0.738976	0.994396	0.83255	0.840583	0.829753	0.83583	0.838735	0.818131	0.900908	0.993898	0.811712	0.966628	1.15471	1.2001	1.22153	1.03564	0.991069
A0A994J4R6	USP9X	248	1	1.78514	1.05186	1.00928	1.05466	1.03	0.982976	0.853358	0.971769	0.92042	0.926198	0.96938	0.945715	0.972263	1.00962	0.97607	1.06167	0.947329	1.05447	1.06197	0.961237	0.947102	1.00043	0.946807	0.945377	0.919399	1.00817	1.06958	0.970182	0.962926	1.21088	1.28148	1.17662	1.03387	1.10056
A0A994J4U7	SLC8A1	214	1	2.17333	0.991388	1.0782	1.17429	0.931306	0.941312	0.891373	0.954246	1.09023	0.825986	0.892013	1.00577	1.00249	0.940921	1.00148	1.09535	1.02134	0.839037	0.986725	1.04288	0.939708	0.884646	0.998696	0.878966	0.794631	0.98049	0.989312	0.805582	1.0901	1.20595	1.27048	1.2568	1.22773	1.07543
A0A994J4W8	ANK1	31	1	0.917449	0.855025	0.853076	0.889414	0.977652	1.08496	1.20156	1.08764	0.701914	0.808076	0.860066	0.802167	0.828631	1.02312	1.2109	0.890652	0.90395	1.10198	1.13367	0.945515	1.23205	1.2766	1.08163	0.896082	1.09853	1.02785	1.06474	1.34806	2.06509	1.39628	1.31633	1.28398	1.73466	1.47897
A0A994J4Y3	SRRM1	89	1	0.845878	0.957749	1.0777	1.10088	1.0983	1.20957	1.26188	0.783792	0.929742	0.875967	1.14778	1.14801	0.853776	0.786268	1.15366	0.940643	0.929109	0.779131	1.01282	1.16544	0.767636	0.776971	0.946579	0.842925	0.869891	0.871469	1.00224	0.739717	0.898068	0.95131	1.02504	0.987608	1.11572	0.883163
A0A994J4Y8	PGAM5	209	1	0.961406	0.994652	0.921105	1.00697	1.04785	1.00408	1.22941	1.07863	1.13683	0.997211	1.06817	1.21327	1.03822	1.0272	1.10157	0.858181	0.990661	0.868843	1.11035	1.12721	0.968695	1.00051	1.09302	1.16715	0.932573	0.906729	1.00934	0.927651	0.89145	1.00439	0.693816	0.992284	0.951315	0.828977
A0A994J591	SRPK2	169	1	1.19594	1.20538	1.00029	1.07269	1.03659	1.07271	0.898791	0.895376	1.27734	0.892434	1.04394	1.29835	1.18156	1.03708	1.07863	0.968111	1.12601	0.799654	0.930167	0.814021	0.768255	0.760542	0.792016	0.841879	0.772846	0.861275	0.987008	0.698178	0.705371	0.803549	0.794469	0.71689	0.707277	0.678472
A0A994J5B1	EPB41L2	679	1	1.07212	1.04341	0.970473	0.907626	0.973183	1.07934	1.02436	1.08768	0.989714	0.964122	1.04207	1.05588	1.05293	1.06425	1.03649	1.08425	0.875578	1.00139	0.940485	0.943914	0.921578	1.03456	0.839608	1.09157	1.1543	0.981576	0.913457	1.119	0.973952	0.877624	1.00846	0.94611	0.905957	0.997558
A0A994J5I1	CTNND2	2	0.9906	1.34982	NA	0.801307	0.703672	0.95163	NA	NA	NA	0.9105	0.573386	0.940161	1.1048	NA	NA	NA	0.836897	NA	1.16038	NA	NA	0.926651	0.577239	0.791146	NA	0.586341	NA	NA	NA	0.768622	NA	NA	NA	NA	1.19778
A0A994J5M1	ATP2B3	210	1	2.03185	1.0646	1.45285	1.2103	1.04921	0.839992	1.04969	0.922789	0.777551	0.785562	0.837541	0.945732	1.0658	0.897607	0.879789	1.08935	0.775999	0.73839	0.854594	0.901942	0.943592	0.91467	0.857225	0.83959	0.880139	0.813979	0.936424	0.912924	0.861396	1.07661	1.32143	1.16424	1.16633	1.07479
A0A994J5M8	CACNA2D1	26	1	1.64078	1.51674	1.3272	1.13196	1.27327	1.09193	1.1221	0.724718	0.862853	0.738853	0.949511	1.17929	1.49421	1.00904	1.13818	1.29314	0.73146	0.627385	0.725395	0.716182	0.740135	0.763345	0.61166	0.810801	0.735171	0.66244	0.797729	0.631029	0.594238	0.542289	0.64068	0.291985	0.494441	0.43995
A0A994J5N6	VTI1A	110	1	1.03196	1.03707	0.951462	0.998587	0.979749	0.91926	0.978814	0.957865	1.16359	1.30369	1.04493	1.14719	1.18528	1.07771	0.998443	0.973693	1.16233	1.00329	0.908115	1.04544	0.926593	1.0423	0.935005	1.03451	0.852824	0.932569	0.988264	0.965867	0.97993	0.961556	0.891765	1.05239	1.02505	0.860305
A0A994J5P0	DNM1	41	1	1.92909	1.14633	1.15098	1.09294	1.43162	1.21213	0.822168	1.09669	1.11136	1.03149	0.884074	0.81317	0.903086	1.0444	1.26397	1.08596	0.586425	1.216	0.871951	0.862761	0.732134	0.885058	0.619036	0.827988	0.939333	0.580161	0.953793	0.577062	0.751466	1.02837	1.52464	1.69887	1.34669	0.9594
A0A994J5W6	SYPL1	4	0.9997	0.722292	1.63434	1.03544	1.04944	1.08286	2.00551	NA	NA	0.744558	0.831694	0.8646	1.32195	1.82199	NA	NA	1.23814	NA	0.778117	1.86174	1.02625	1.04412	0.789573	0.895734	1.93004	0.943048	NA	1.58487	NA	0.571083	NA	1.69237	0.728245	0.901514	0.683095
A0A994J6J2	GRIA4	52	1	0.94298	1.1406	1.03926	0.828978	1.07393	0.913646	1.19046	0.934832	0.916144	0.961261	1.03299	0.893322	0.96706	1.15813	1.14687	0.865293	0.975229	1.08323	1.101	1.07542	0.998744	1.0342	0.992491	1.07705	0.825722	0.818569	1.05347	0.865756	0.935925	1.00491	0.951088	1.10363	0.984299	1.05937
A0A994J705	HMGA1	5	0.9927	NA	0.718923	0.79069	NA	NA	1.26582	0.997234	0.980968	0.980304	1.20504	1.26317	NA	0.852922	0.874354	0.852474	NA	1.03873	1.1703	0.821201	1.00144	NA	1.25243	1.31959	1.21688	NA	1.05313	0.860044	1.04737	1.12599	1.31427	1.00935	1.31551	NA	NA
A0A994J709	TTBK1	11	1	0.517754	0.912602	0.847514	0.76856	0.93609	1.07106	0.802981	0.754046	0.779926	0.980103	1.1399	0.792942	0.915674	0.830439	0.775127	0.720962	0.991504	1.62047	1.50678	1.04101	1.10864	1.17853	1.40216	1.24082	0.885979	1.39135	1.03119	1.51819	1.24758	1.28061	1.17307	1.34896	0.919039	0.961255
A0A994J749	IMPDH	125	1	1.29385	1.11574	1.14059	1.05068	1.1591	0.984622	1.0329	0.950046	0.912092	0.945648	1.01143	0.957904	0.891578	1.04893	0.96473	1.42398	0.812895	0.985916	0.857943	0.762542	0.833793	0.78163	0.74766	0.820875	0.997793	0.901396	0.872166	0.715632	0.821541	0.864874	1.00402	1.02359	0.880424	0.846666
A0A994J782	HNRNPK	7	1	0.968058	1.08491	1.10415	1.05948	1.04692	1.06314	1.14216	1.21035	0.85802	1.40285	0.775346	1.11115	1.07925	1.16656	0.92661	1.05873	1.29942	1.00432	0.75754	1.18466	0.919063	1.5023	0.647771	1.06025	1.05793	1.04277	1.26839	1.04027	1.02632	0.697501	0.653435	1.00384	0.725404	1.0917
A0A994J7C1	TNC	8	1	1.0896	0.812243	0.931073	1.15578	1.49422	0.856453	1.0584	0.900868	0.755463	0.81129	0.934246	1.3864	1.06629	0.818715	0.94283	1.24742	1.03002	0.959135	0.798055	0.935731	2.0151	1.06388	1.38385	0.918401	1.83231	0.792109	1.05967	1.03486	1.82662	1.12358	1.3806	2.32658	1.75613	2.76667
A0A994J7H4	NPLOC4	161	1	1.36245	1.00638	0.993055	0.993759	0.993448	0.96822	0.875539	1.06691	1.02651	0.951468	0.949479	0.94408	1.06626	1.09032	1.07419	1.02402	1.03755	1.04666	0.8842	0.834391	0.990438	0.976707	0.94909	0.907558	0.952889	1.00845	0.927245	0.971091	1.03326	1.16397	1.0647	1.15634	1.17967	1.12653
A0A994J7P4	PPP1R12B	108	1	1.00377	1.16445	0.98196	0.818837	1.00061	0.887654	0.978289	1.08201	1.01311	1.03562	1.13795	1.05283	0.979554	1.07751	1.06031	0.892739	1.01164	0.819027	0.839402	0.992443	1.02986	0.975293	1.03252	1.15149	0.989024	0.879254	1.0908	1.06861	1.19115	0.949958	0.864985	1.04337	0.945423	1.02664
A0A994J7P9	FXR2	139	1	1.05884	1.01417	0.8375	0.990259	0.949929	1.04595	0.85442	0.925989	1.1431	1.03274	1.00182	0.98007	0.921961	1.00701	1.08513	0.927097	1.00929	1.03153	1.01983	1.04239	0.980414	0.86102	0.965774	0.936619	0.951852	0.97891	1.04957	0.833694	1.08012	1.03421	1.09597	1.16314	1.13997	1.13413
A0A994J7Q7	CEP43	16	1	1.08244	1.0133	0.871084	1.02765	1.32355	1.05147	1.15224	1.25607	0.858805	1.06666	1.07802	1.05543	0.998259	0.891839	1.23316	0.913897	1.36775	1.08951	1.08775	0.962362	1.16302	1.189	1.26475	1.12603	1.32794	1.14869	0.939782	1.39651	1.08238	0.91379	0.926002	0.880752	1.64882	1.20534
A0A994J7X3	VASP	3	1	1.19856	NA	0.84136	1.05377	0.952877	NA	1.11227	1.2365	0.844553	0.948843	1.01211	0.981809	NA	1.04552	1.03455	0.968853	0.816954	1.36537	NA	NA	1.66871	1.38057	1.52132	NA	1.53738	1.20597	NA	1.33155	1.13828	1.34727	NA	1.39258	1.52837	0.970567
A0A994J819	DLG2	417	1	1.46034	1.06288	1.01002	0.992577	0.999829	0.947579	0.996859	0.934178	1.11312	0.991787	1.03665	1.09115	1.22851	1.14746	1.1298	0.977497	1.11639	0.856555	0.835184	0.881277	0.816356	0.881651	0.825338	0.929429	0.798318	0.914118	1.02005	0.795559	0.884065	0.956242	0.891864	0.888306	0.949194	0.942016
A0A994J847	EPB41	1	0.9981	0.685842	NA	NA	0.99936	0.884133	NA	NA	NA	NA	NA	NA	0.864593	NA	NA	NA	0.811369	NA	NA	NA	NA	1.11491	NA	NA	NA	1.21717	NA	NA	NA	NA	NA	NA	NA	1.59643	1.32331
A0A9H3ZVF6	RAB37	49	1	0.911137	1.07373	0.80784	1.06047	0.802908	1.10638	0.874794	1.07234	1.27836	1.03342	0.821641	1.02537	1.2542	1.01729	0.799327	1.1416	1.05823	1.31266	1.03762	1.11856	0.857415	1.0351	0.96841	1.10193	1.33219	0.93539	1.11125	0.775113	0.874913	0.855034	1.25306	0.883474	1.37072	1.1436
A0A9L9PXJ4	MYL10	8	1	1.16553	1.32254	1.17342	0.977292	1.14407	0.926729	0.866502	1.30145	1.24715	1.19667	0.844795	1.00025	1.23421	0.942388	0.790821	1.01364	1.16418	1.00195	0.620216	0.737838	0.86142	1.02487	0.837816	1.07209	0.896926	0.968262	1.12874	0.876734	0.503373	0.337923	0.49567	0.21708	0.48916	0.393037
A0A9L9PXL0	KCNQ2	61	1	1.21741	0.870307	0.91856	1.01727	1.03211	0.971257	0.921457	0.980798	0.957788	0.946124	1.05185	1.01171	0.880202	1.07306	1.00134	1.01576	1.03801	1.06445	1.08452	1.28673	1.03444	1.17701	1.01836	1.07728	0.964345	0.979903	1.06002	0.979949	1.26379	1.10797	1.18754	1.18091	1.15438	1.2012
A0A9L9PXQ2	ARHGAP23	18	1	1.00419	0.903356	1.00782	0.85225	0.968731	0.842046	0.915482	0.962864	1.15181	0.936903	0.889179	0.960681	1.25055	0.915339	1.04736	1.02526	1.09652	0.920906	0.971737	0.847974	0.883992	0.980615	0.909258	1.29857	0.98955	0.932696	1.10554	0.830966	0.802002	1.01115	0.743794	0.611209	0.64239	0.581472
A0A9L9PXS4	ARHGAP23	86	1	0.923968	0.967448	0.932913	0.933548	1.04081	1.00061	0.97713	0.939423	0.999715	1.03244	1.12178	0.945838	0.970311	1.00806	1.02264	0.956495	0.958362	1.10099	1.0167	1.07545	0.992854	0.971098	1.12125	1.02892	0.986137	0.971969	1.02584	0.900707	1.15378	1.15748	1.10634	1.14783	1.08732	1.06982
A0A9L9PXZ0	MADD	23	1	1.38206	0.975414	0.804667	0.921182	0.853699	0.773752	0.947246	1.04198	0.873599	0.982244	0.990125	1.17757	1.07814	1.01122	1.30945	0.81557	1.12093	0.947967	1.18802	0.533056	0.72321	0.895977	0.793512	1.00464	0.692612	1.03227	1.15989	0.837971	0.771413	1.1316	1.05977	1.0498	1.10188	0.966038
A0A9L9PXZ3	MADD	371	1	1.43837	0.926257	0.922275	1.10521	0.928404	0.982398	0.935275	0.977869	1.03304	0.939716	0.938031	1.02528	1.04419	1.06404	1.02993	1.1025	1.06439	1.0224	1.04151	0.905442	1.00865	0.94922	0.997025	1.03629	0.899278	0.984094	1.05469	0.953148	1.00029	1.05207	1.10679	1.14949	1.14179	1.03525
A0A9L9PY76	PDE4DIP	7	0.9997	0.64421	1.27056	0.937421	0.734194	0.62137	1.10693	1.05445	1.1457	0.83367	0.90571	1.01338	1.17498	0.802302	0.761374	0.999594	0.626992	0.925384	0.859701	0.835992	1.12496	1.1596	1.26131	1.51218	0.864014	0.909523	1.00623	0.881649	1.00735	0.847861	1.23323	1.25452	0.906221	0.617413	0.472622
A0A9L9PYA4	GRIA1	159	1	1.75116	0.99622	1.09708	1.2981	1.30936	1.01202	0.936931	0.90656	0.892855	0.860042	0.920298	0.933964	1.04065	0.963323	1.1255	1.05703	0.981297	0.677267	0.938152	0.939591	0.873175	0.84339	0.94563	0.898079	0.784506	0.891598	0.967598	0.796288	1.00439	1.12753	1.28267	0.981398	0.884195	0.911468
A0A9L9PYL0	MFF	80	1	1.14237	1.20758	1.09837	0.906532	0.939449	1.00445	0.847169	0.909286	1.30167	1.17814	1.11839	1.08248	1.028	1.02737	0.954805	1.0201	1.0561	0.9734	1.01393	0.84963	0.709016	0.671112	0.771301	0.906685	0.772867	0.782081	0.997838	0.780769	0.864023	0.617738	0.871027	0.723572	1.01761	0.945516
A0AA34QVG5	HDGF	277	1	0.867808	1.06813	1.05491	0.942081	0.830925	0.900034	0.994374	0.956039	1.02102	1.06266	1.05803	1.00082	1.06017	1.35495	1.00725	1.21032	1.07249	0.836071	0.968406	0.832581	0.998044	1.24043	0.997126	1.0555	0.99383	1.10582	1.04914	1.44528	0.802907	0.725254	0.484246	0.677603	0.536899	0.644986
A0AA34QVG9	ADO	146	1	0.966153	1.10357	1.02892	0.946165	0.928303	1.04676	1.15134	1.0574	0.995924	0.884108	0.984373	1.09651	1.16156	1.22066	1.00935	1.07592	0.978508	0.9739	1.05488	1.00454	1.03553	0.991322	0.947563	1.03987	0.978829	1.06199	0.997619	1.15293	0.807391	0.983144	0.897964	0.897035	0.953172	1.03509
A0AA34QVJ7	VMP1	2	1	2.43468	NA	1.04564	1.66979	1.52654	NA	NA	NA	0.892745	1.03837	0.952861	NA	NA	NA	NA	2.10174	NA	1.07502	NA	NA	0.977669	1.17474	0.99978	NA	NA	NA	NA	NA	1.17905	NA	NA	1.1606	NA	1.57958
A0AA34QVK8	ABLIM2	173	1	1.10962	1.36017	0.983214	0.868083	0.852283	0.887072	0.941584	1.04797	1.21353	1.01315	1.13324	1.3308	1.14373	1.1076	1.07321	0.93632	0.934162	0.976879	0.882973	0.893414	0.904358	0.853574	0.804719	0.912195	0.783869	0.789312	0.88046	0.8907	0.825012	0.866148	0.811687	1.01934	0.836313	0.888552
A0AA34QVL7	DDI2	89	1	0.99821	1.12079	1.0367	0.973834	0.895906	0.988316	0.968561	1.16566	1.10382	1.0402	1.01881	1.08689	1.1826	1.07831	1.12741	1.04494	0.995852	1.00074	0.87956	0.84184	0.869243	0.937602	1.04261	0.995161	0.82747	1.00164	0.959934	0.922065	1.12149	0.968564	0.853659	0.903373	0.751698	0.781219
A0AA34QVS8	FHIP2A	35	1	1.62119	1.00564	1.05101	1.07631	1.11762	0.891593	1.06583	0.952209	1.06133	0.885385	0.914609	1.01104	1.06141	1.31285	1.07018	1.11912	0.879737	1.30655	0.859568	1.06987	0.959595	1.12206	1.26176	0.842193	0.953688	0.98676	0.993175	0.837836	0.56473	0.889747	1.31681	1.13147	0.921796	0.83142
A0AA34QW15	BAIAP3	18	1	0.962729	0.819322	1.08388	0.966864	1.07343	0.95583	1.13217	0.948459	1.03435	1.12697	1.2153	0.910412	0.890011	0.99394	1.11702	0.933185	1.27181	1.33666	1.06814	0.95656	1.08087	0.975945	1.48086	1.12076	1.00326	1.2298	1.12161	1.14455	1.22582	1.50907	1.17545	1.86895	1.00738	1.03528
A0AVT1	UBA6	178	1	1.52113	0.910851	1.01466	1.03822	1.06432	0.98324	0.889444	0.944105	0.821229	0.829976	0.886858	0.894479	0.886633	1.16449	0.929453	1.39197	0.928538	1.03612	0.980444	0.845676	0.9805	0.966345	1.03692	0.947043	1.08627	1.16886	0.972873	1.00548	1.00751	1.13126	1.23177	1.01657	1.09065	1.18056
A0JNW5	BLTP3B	45	1	1.07857	0.739209	0.966636	1.13174	1.06584	0.896092	0.795893	1.01709	0.960459	0.927178	0.946348	1.01025	0.977408	1.10992	0.958756	0.933959	1.09871	0.982197	0.854095	1.0466	1.10919	0.957494	1.04896	1.04105	1.09546	1.02685	0.950431	0.979664	1.17374	1.15162	0.911411	1.33273	1.33184	1.32242
A0M8Q6	IGLC7	9	1	0.534839	1.49729	1.17522	1.19297	1.1009	1.18928	1.03856	0.753343	0.992281	0.75946	0.986061	0.906927	1.50283	0.859137	1.06558	0.883795	1.12263	1.16145	1.15639	1.89582	0.793264	1.47212	1.43723	1.47412	1.15685	1.56891	0.790924	1.58786	1.23367	1.03246	0.886979	1.00487	1.24915	0.90083
A0MZ66	SHTN1	187	1	1.50061	1.13459	1.04171	0.997726	1.03692	0.998677	0.962962	0.988094	0.886401	0.935686	0.911672	0.982342	0.918279	0.861364	0.869446	1.15544	0.897606	0.998803	1.02914	0.941331	0.965615	0.972879	0.948425	0.967072	0.962378	1.02745	0.889696	1.00496	0.958411	1.0642	1.14105	1.02444	0.916407	1.07273
A0PJW6	TMEM223	14	1	0.79118	0.873323	0.877668	0.961689	0.896776	1.12609	1.09925	1.22899	1.1104	1.10111	1.09761	0.969268	1.04695	1.23431	1.22502	1.00333	0.961646	1.03963	1.1751	1.25911	1.1726	0.905059	1.10235	1.13975	1.02141	0.920445	1.08909	1.00077	0.994541	1.39345	1.075	1.23237	1.14077	1.23657
A1IGU5	ARHGEF37	24	1	1.06614	0.90255	0.927452	0.922689	0.925998	1.02313	1.05557	0.939309	0.804513	0.920162	0.961217	0.948274	0.94708	1.06452	1.03821	1.04157	1.02391	1.29637	0.968567	1.09664	1.06116	1.14485	1.15057	1.11692	0.964579	1.21039	1.00994	1.10825	1.27912	1.09644	1.17378	1.36399	0.980067	1.22469
A1L0T0	ILVBL	108	1	0.90229	0.912082	1.02002	1.0423	1.04739	1.14091	1.19415	1.14162	0.954417	0.978549	1.09322	0.909073	0.927272	1.02375	1.04501	0.989949	0.979807	1.04477	1.07445	1.09646	1.08511	1.08727	1.21722	1.01907	1.10503	1.09153	0.991238	1.08462	1.17275	1.37013	1.09501	1.14068	1.20187	1.083
A1L390	PLEKHG3	13	1	0.974543	0.89788	1.2865	1.02351	1.14564	0.968744	0.978813	0.926577	1.10407	1.40413	1.2741	0.978727	0.726629	1.00452	0.991249	1.11876	0.95724	1.32408	0.977453	1.23813	1.41959	1.59595	1.3759	0.929466	1.30538	1.20112	0.956071	1.22429	1.08808	1.52999	1.29599	1.29434	1.35162	1.52117
A1X283	SH3PXD2B	82	1	0.926419	0.796417	0.881834	0.948609	1.03725	0.954695	1.06076	1.03419	0.953376	1.04579	0.907381	0.923458	0.996841	0.986571	1.00828	1.02316	1.06738	1.27931	1.02076	1.14748	1.05392	1.12418	1.18443	1.13766	1.08864	1.15038	1.10178	1.05117	1.27312	1.16566	1.2605	1.16393	1.10801	1.02613
A1Z1Q3	MACROD2	55	1	2.45037	1.35004	1.04851	0.972033	0.938794	0.657777	0.920913	0.851664	0.716745	0.765345	1.06405	1.23068	1.17781	1.01399	1.08078	0.977933	0.909133	0.568533	0.649192	0.610766	0.721471	0.677359	0.83845	0.775956	0.671065	0.752588	0.855701	0.69309	0.469843	0.637195	0.503205	0.642976	0.769887	0.579973
A2A2Q9	AAR2	26	1	0.9129	0.905936	0.98855	1.04682	1.17213	1.01467	1.21501	1.05639	0.825058	0.897205	0.953631	0.895643	0.856128	0.87123	1.1668	1.03918	1.06696	1.09761	0.951021	0.966926	1.05556	1.20877	1.29703	0.976498	1.31947	1.193	0.961313	1.38878	1.13298	1.06173	0.870368	1.03201	0.983946	1.0438
A2A3F7	TRPM3	7	0.9993	0.686474	0.708864	0.664168	1.06693	0.915028	0.979121	0.897323	0.685672	0.555317	0.755236	0.775139	0.787154	0.930746	0.996668	1.10393	0.826479	0.984293	0.831072	1.21307	1.57966	1.1709	1.03941	1.07811	1.16596	0.989627	0.90678	1.37866	1.10927	1.1308	1.87867	2.04961	0.792483	1.54077	1.29464
A2A3N6	PIPSL	7	1	1.13368	0.970246	1.11264	0.908689	1.01263	1.06965	1.1721	1.0228	0.983914	1.00317	1.21981	0.941717	0.946525	1.29481	1.04282	1.13721	1.05131	1.41236	1.24756	1.21245	1.30023	1.28498	1.31931	1.17211	1.11825	1.09341	1.10028	1.30508	1.34918	1.32414	1.3323	1.52699	1.7092	1.67721
A2A3R5	RPS6	83	1	1.07356	1.28231	0.931019	1.24717	1.10957	0.988706	0.757945	0.632023	1.07339	0.794416	1.15988	1.28449	1.2228	1.22226	0.995734	0.937272	1.36413	0.704713	0.849836	0.406504	0.379825	0.500534	0.661204	0.465694	0.425894	0.879876	1.04872	0.353784	0.512466	0.609351	0.586194	0.71844	0.674658	0.618287
A2BFX2	HLA-DRB1	58	1	0.896154	1.1778	0.988324	0.694613	1.1849	0.872888	0.986231	0.900151	0.678101	0.754759	0.869312	0.894268	1.15796	1.03638	0.820617	0.587208	1.13312	0.757854	0.757246	1.26935	0.946748	1.26361	1.18097	0.820502	0.912491	1.27803	1.19259	3.62499	3.54925	0.986862	0.776248	1.06023	0.918444	0.79615
A2RRP1	NBAS	13	0.9999	1.19434	0.873881	NA	0.897498	1.20826	0.969469	0.941712	0.942136	NA	NA	NA	1.05977	0.795249	0.796665	0.932035	0.983413	0.97842	NA	1.1318	1.25629	1.21906	NA	NA	1.01873	1.18236	1.12241	0.98362	1.02447	NA	1.50592	2.21406	NA	1.57897	1.35293
A2RTX5	TARS3	94	1	1.42929	1.0305	1.02345	1.1142	1.13097	1.05321	0.899384	1.03203	0.887181	0.784369	0.929828	0.947454	0.986753	1.00226	0.994634	1.06447	0.969151	0.893332	1.10442	0.969755	0.951459	0.889313	0.958492	0.879074	0.975656	1.11102	1.02378	0.903058	0.812081	1.00263	1.09315	0.929844	0.973385	1.05229
A2RU30	TESPA1	3	0.9955	1.41941	NA	0.940846	1.46451	1.30265	NA	1.2298	0.950572	1.16433	1.2613	1.14322	1.21918	NA	1.35449	1.14972	1.20206	0.94036	1.17987	NA	NA	1.69752	1.10713	0.947481	NA	2.28265	0.957768	NA	1.15127	0.992568	1.19053	NA	1.37511	1.6623	1.67389
A2RU49	HYKK	4	1	1.28042	1.01711	NA	1.04638	1.12643	1.37969	1.02688	1.08034	NA	NA	NA	1.18486	1.02081	0.743137	0.945626	0.855956	0.946205	NA	1.18019	1.23568	0.936485	NA	NA	1.31423	1.24936	0.907691	1.21705	0.896982	NA	0.971987	1.17746	NA	1.00164	0.812341
A2RU67	FAM234B	63	1	0.922896	1.12834	1.08457	0.878962	1.03279	1.09305	1.07593	0.893677	1.08956	0.979281	1.11639	1.02289	1.00889	1.0343	1.00732	0.964157	0.999148	1.14076	1.03086	1.1883	0.97326	1.09697	1.00759	1.10922	0.913181	0.978272	1.10547	1.15369	1.09654	1.25173	1.09707	1.05373	1.07803	1.05286
A2RUC4	TYW5	92	1	0.888804	0.98852	1.00463	1.10308	0.967392	1.09441	1.10373	1.00084	0.998455	1.01679	1.02622	1.02271	1.08744	0.955346	0.972388	0.944566	0.953877	1.04247	1.16303	1.14686	1.11672	1.24859	1.11551	1.14179	1.19448	1.03725	1.09575	1.1383	1.10093	1.16091	1.01801	1.17598	1.1655	1.03441
A3KMH1	VWA8	25	1	0.852437	0.775873	0.988717	1.15744	1.00203	1.09123	0.918274	1.1046	0.860779	1.01243	1.09601	0.783216	1.08907	0.857023	0.909578	1.18181	0.902695	1.15875	1.38525	1.13099	1.3782	1.37007	1.39102	1.11562	1.24293	1.24526	1.26641	1.18701	1.40708	1.06252	1.17472	1.28441	1.66225	1.44513
A3KN83	SBNO1	1	0.9989	NA	NA	NA	NA	NA	NA	0.613779	0.813366	NA	NA	NA	NA	NA	0.818888	0.881774	NA	0.767736	NA	NA	NA	NA	NA	NA	NA	NA	0.793485	NA	0.77534	NA	0.602429	NA	NA	NA	NA
A4D126	CRPPA	66	1	1.45838	1.19181	1.24355	1.2073	1.05461	1.03255	0.910403	1.05339	0.953893	0.852548	0.949472	1.00584	1.03803	1.12828	1.03121	1.20807	1.01056	0.902488	0.908169	1.01487	0.879887	0.923996	0.882279	0.827402	1.02033	1.11152	0.892821	1.08675	0.904793	0.945932	0.962716	0.873822	0.91854	0.814362
A4D161	FAM221A	8	1	1.07688	1.20666	0.741894	0.94653	1.30053	1.11056	1.22092	1.06699	0.991045	1.04547	0.828418	1.00712	0.975742	1.53551	1.40065	1.45393	1.19549	0.705895	0.97912	0.716636	0.793502	0.723506	0.552938	0.942852	0.849054	0.992228	0.936897	0.839968	0.521495	0.998376	1.12968	0.618768	0.885629	0.848713
A4D1E9	GTPBP10	5	1	1.23362	1.05572	1.18234	0.881131	0.938964	1.25847	0.767239	0.767833	0.733734	1.20767	1.3528	0.843681	0.824971	0.715528	0.837232	1.13799	0.73184	1.27207	1.77496	1.26134	1.12891	1.32263	1.40066	0.993305	0.921391	0.676117	1.21049	0.858148	1.11549	0.797973	1.12675	1.07412	1.09597	1.19866
A4D1P6	WDR91	98	1	1.14185	1.11725	1.02335	1.10171	1.08663	0.935602	0.787149	0.939058	0.998523	0.917753	0.961379	0.974528	1.08307	0.924747	0.983791	1.03092	1.01329	0.917388	0.932075	0.843761	0.933946	0.95051	0.908306	0.94808	0.907674	1.02138	1.03946	0.838838	0.821313	0.846592	0.852806	0.713999	0.759737	0.858782
A4D1S5	RAB19	13	0.9993	0.363362	0.496581	0.637099	1.0524	0.907344	0.836943	1.26702	1.0837	1.05197	1.20274	0.829551	0.711777	0.959373	0.77819	0.840191	0.598694	0.945771	1.11791	0.741039	3.3132	2.52115	2.30516	2.69472	1.944	2.48036	0.829211	0.997528	1.42257	2.66499	1.96502	3.21375	3.65575	4.26555	2.03357
A4D2B0	MBLAC1	83	1	0.882151	0.993618	0.950447	0.829737	0.914394	1.03618	0.999703	0.948833	1.08675	1.09311	1.02995	1.10904	1.04594	0.964059	0.952731	0.963789	0.985594	1.13017	1.21618	1.08835	0.898207	1.03962	1.10959	1.04125	0.930467	0.980837	1.08541	0.999012	1.26148	1.02379	1.04139	1.28425	1.1307	0.951457
A5A3E0	POTEF	80	1	0.993305	0.705524	1.19073	1.34765	1.28175	1.16034	1.15464	1.11014	0.97059	0.82436	0.802872	1.00917	0.975407	1.05179	1.02897	1.22105	0.829812	0.556145	0.64323	0.622687	0.826334	1.11884	0.821476	1.11971	0.937259	0.744876	0.63228	0.7896	0.611094	0.754557	0.39731	0.625476	0.894117	0.680388
A5D8V6	VPS37C	18	1	1.43154	0.970133	1.26241	0.894839	1.05949	0.662915	0.923624	1.1144	0.824086	0.969996	0.93043	1.41028	1.07149	1.11364	0.955885	1.05049	1.09945	1.01206	0.702444	0.789052	0.904848	0.987211	0.84825	0.839972	0.97873	1.17237	0.904815	0.859063	0.796567	0.572193	0.918675	0.520869	1.00361	0.459635
A5PKW4	PSD	117	1	1.34687	1.10785	0.901496	0.949887	1.16905	0.954134	0.863425	1.00392	1.00668	1.02763	1.02414	1.07458	1.03186	1.04993	1.24951	0.983771	1.06932	0.781954	0.997941	1.04831	0.975147	0.868508	0.926497	0.956652	0.877861	0.835579	1.05194	0.71889	0.915678	1.07017	1.2096	1.14865	1.16926	1.1028
A5PLN9	TRAPPC13	41	1	1.3222	1.11726	1.16003	1.17902	1.13166	1.17109	0.974758	0.992788	1.13601	1.08008	1.09192	1.00625	1.06461	1.03554	0.984126	1.06901	0.949231	0.979968	0.909802	0.933455	0.90345	0.89519	0.952212	0.923886	0.969125	0.994381	0.891686	0.870511	0.790924	0.960826	1.03282	0.989916	0.94094	0.942331
A5YKK6	CNOT1	96	1	1.33331	1.03118	1.04184	1.0529	1.15078	1.07891	0.98502	0.987657	0.888588	1.00154	1.02061	0.952731	0.909698	0.892349	1.02909	0.918658	0.997374	1.09061	1.08675	1.0999	0.990354	1.12817	1.12293	0.905679	0.961718	1.02246	1.02899	1.02313	1.22015	1.12496	1.2537	1.33579	1.12253	1.06451
A5YM72	CARNS1	147	1	1.29709	0.957139	0.943439	0.967758	1.14957	0.833088	0.90301	0.807699	0.690557	0.774355	0.987982	0.899034	0.846943	1.61309	1.13158	1.48608	0.988124	0.951877	1.03116	0.754013	0.963998	0.909989	1.03719	0.836291	0.964398	1.22753	1.05638	0.98427	0.909386	0.931984	0.850398	0.79759	0.987773	0.985333
A6H8Y1	BDP1	3	0.9937	0.698402	0.803703	NA	0.991231	0.904365	1.18015	NA	NA	NA	NA	NA	1.00923	0.968914	NA	NA	0.819287	NA	NA	1.55354	1.95092	1.71009	NA	NA	1.29534	1.32113	NA	1.14913	NA	NA	NA	1.83598	NA	2.16532	1.82904
A6NCE7	MAP1LC3B2	108	1	0.718053	0.912417	0.862959	0.90455	0.933431	1.06151	1.01954	0.975343	1.3352	1.1796	1.00754	1.02101	1.05809	0.929723	1.03059	0.820021	1.11937	1.23346	1.12685	1.23994	1.16197	1.33299	1.22182	1.21036	1.10269	1.16798	1.07263	1.18583	1.29165	1.01274	0.872133	0.921953	0.951128	0.985763
A6NCS6	C2orf72	8	0.9993	0.692664	0.829865	1.0199	0.897141	0.890214	0.892701	1.26215	1.28572	1.07354	1.27888	1.28843	1.20858	0.826013	0.946915	1.07552	1.16401	1.02827	0.85171	1.06952	1.11493	1.08212	0.66549	0.631102	1.03748	1.31875	1.22081	0.85912	1.41073	1.52515	1.26124	1.22815	1.37485	1.00378	1.51595
A6ND91	ASPDH	12	1	0.698048	1.12966	0.983578	1.22028	1.07868	1.4808	1.27234	1.11518	1.16791	1.35388	1.1379	0.936551	0.836588	0.962892	0.866089	0.739096	0.966999	1.29	1.27031	1.71365	1.277	1.35151	1.45982	1.53017	1.26108	1.21501	0.954962	0.997734	1.24082	0.974793	0.823136	1.28761	1.27542	1.12029
A6NDB9	PALM3	62	1	0.750779	1.01869	1.07671	0.917924	0.915051	1.10325	1.25187	1.26191	0.937917	1.00164	0.873352	1.16478	0.935834	0.911796	1.17339	0.873149	0.843675	0.977202	1.00428	1.39122	1.13306	0.981411	1.06064	1.20071	1.06931	0.980531	1.11676	1.05907	0.964643	0.978543	1.22104	1.06178	0.996949	0.969987
A6NDG6	PGP	136	1	1.12877	1.06179	1.04718	1.07246	1.11194	0.974816	1.08527	0.977628	1.18106	1.04265	1.08963	1.04959	1.16806	1.16501	1.02856	0.899358	1.07394	1.01269	0.82152	0.75149	0.891045	1.02588	0.973073	0.980585	0.863472	0.913788	0.946911	0.866275	0.751604	0.811037	0.557087	0.650594	0.6807	0.745354
A6NDL7	METTL21EP	5	0.9958	0.675406	0.854194	0.836023	0.852115	0.760533	0.876952	1.3273	1.26946	0.780482	1.05408	1.03362	1.0906	0.822172	0.822308	0.839575	0.734441	0.997895	1.19271	0.965502	1.73091	1.68321	1.53939	1.40778	1.14226	1.27358	0.924417	1.09882	1.58706	1.46067	1.48065	1.35016	1.6075	1.69396	1.07079
A6NDU8	RIMOC1	10	1	1.64422	1.00103	NA	1.01043	0.961317	0.975264	1.0684	1.01457	NA	NA	NA	0.964026	0.909288	0.996114	1.10251	1.02564	0.748951	NA	0.859681	1.2478	0.891484	NA	NA	1.05852	1.03011	0.873234	0.8362	1.21201	NA	1.26086	0.843044	NA	1.08722	0.819977
A6NE02	BTBD17	80	1	0.967538	0.923602	1.03487	0.873351	0.846964	0.854033	0.843969	0.819879	0.893266	1.08301	1.0644	0.958283	1.20661	1.32461	1.07758	0.735556	1.03064	1.34893	1.02424	1.03592	0.790804	0.991384	1.09599	1.01997	0.703613	0.942466	0.947616	0.989781	1.12832	0.865777	0.986089	0.892961	0.881477	1.10163
A6NED2	RCCD1	71	1	0.833808	0.928693	0.914398	0.985135	0.946465	1.02701	1.05105	0.968736	0.992315	0.989221	1.05065	1.05921	1.11234	0.984153	0.958079	0.971176	1.00304	1.0609	1.33137	1.07918	1.20393	1.27208	1.13424	1.13004	1.21627	1.08153	1.13246	1.12292	1.07134	1.07088	1.16993	1.15843	1.12266	1.17805
A6NEL2	SOWAHB	10	1	0.588642	1.06793	0.953372	1.07022	0.745169	1.04002	1.15139	0.919118	0.91263	0.956874	0.996448	0.953847	0.930487	1.06352	1.11498	0.918948	0.806322	1.4591	1.35294	1.31063	1.02861	1.0026	0.943364	0.972457	0.838056	1.20444	1.13871	1.00151	1.17693	1.01631	0.980418	1.03826	1.28558	1.06634
A6NF36	CCDC182	7	0.9951	1.27314	1.29914	1.42089	1.07288	1.36727	1.33455	1.03776	1.04995	0.851362	0.622446	1.09053	0.937092	1.00909	0.842573	1.19958	1.06546	0.897224	0.574178	0.384665	0.654579	0.776587	0.962612	0.898764	0.763593	1.2431	0.929592	0.822769	0.74383	0.912748	1.13756	0.771764	0.668331	0.773702	0.904141
A6NF51	BPNT1	2	0.9999	NA	NA	1.10635	NA	NA	NA	1.39364	1.19598	0.921673	0.654497	0.718644	NA	NA	1.08004	1.41298	NA	1.1409	0.921492	NA	NA	NA	0.967568	0.960576	NA	NA	1.22035	NA	1.21782	0.954839	1.41469	NA	1.03053	NA	NA
A6NFN3	RBFOX3	23	1	0.903003	0.954833	1.01429	0.915213	0.970825	1.0624	1.22809	1.02037	1.33109	1.1431	1.11313	1.00804	1.01939	1.05339	1.12924	0.88175	1.15803	1.13004	1.12597	0.83988	0.841561	1.00237	1.04818	0.881256	0.899697	1.05097	1.04748	1.26377	1.24025	1.17336	1.11214	1.23947	1.10464	1.08737
A6NFQ9	SEPTIN8	262	1	1.83369	1.1763	1.15431	1.16376	1.05368	1.11769	0.867465	0.98327	0.898297	0.815176	0.978882	0.858174	0.84872	1.03634	1.0773	1.1764	0.819638	0.931192	0.833104	0.747966	0.700177	0.699209	0.681037	0.704441	0.88544	0.88789	0.910618	0.721084	0.842343	0.921063	0.886227	0.873524	0.882775	0.905489
A6NFY7	SDHAF1	30	1	0.785544	0.745525	0.747455	0.91526	0.920266	0.748504	0.856747	1.12843	1.26675	1.21654	1.0894	0.866591	0.979994	1.28676	0.892311	0.947284	1.24789	1.23454	1.15802	1.32896	1.31137	1.21351	1.28863	1.31035	1.10021	1.17507	1.01249	1.71126	1.63521	1.74042	1.61694	1.8613	1.65582	1.57968
A6NGB9	WIPF3	177	1	1.39472	1.05867	1.17392	1.172	0.976325	1.03921	0.948352	1.01149	0.971588	0.933862	0.978495	0.896699	1.33657	0.944505	1.0032	1.05433	1.27198	0.673197	0.937767	0.830476	0.905711	0.884489	0.90985	0.933595	0.744557	0.911238	0.976532	0.758553	0.816664	0.776109	0.772992	0.780621	0.764161	0.74816
A6NGN9	IGLON5	73	1	0.69512	0.927545	0.901731	0.925021	0.861049	0.963717	1.20269	0.859035	1.42516	1.2637	1.01499	1.05597	1.16434	1.0382	1.05055	0.803388	1.02307	1.16708	0.956239	1.41529	0.987142	1.23657	1.08126	1.11711	0.703372	0.944117	1.0572	0.988794	1.14065	1.15172	0.813944	0.966281	0.910064	1.05257
A6NGU5	GGT3P	44	1	0.843098	0.86783	0.954202	0.963534	1.03861	1.01662	1.24124	0.949597	0.949598	0.946467	1.069	0.884951	1.05869	1.02611	0.896919	0.974995	1.1298	1.20815	1.22595	1.03993	1.2841	1.18912	1.39822	1.11331	1.16258	1.42979	1.19897	1.14802	1.02368	1.10329	1.00732	1.24331	1.13603	1.0659
A6NHL2	TUBAL3	119	1	1.26197	1.04707	1.14402	1.26904	1.39531	0.981581	0.950032	0.940504	1.11082	0.947838	1.09627	0.918428	0.959418	0.918345	1.09059	1.15249	0.808925	0.960594	0.874249	0.845713	0.882599	0.836228	0.742555	0.817637	0.690968	0.805471	0.793193	0.705165	1.06006	1.25939	0.8825	1.00502	0.800107	0.72734
A6NHQ2	FBLL1	96	1	0.891054	0.931527	0.952716	0.983138	1.05663	1.07719	0.905407	1.0118	1.23188	1.1034	1.02659	0.983263	0.945369	0.906865	1.13592	0.90715	1.05047	0.918987	1.00001	0.894791	0.828757	0.82597	0.905887	0.86938	0.992091	0.903532	1.0568	0.938864	1.02413	1.10777	0.993854	1.19523	1.24159	1.13635
A6NHR9	SMCHD1	9	0.9998	0.878535	0.709549	0.985337	0.984377	0.998945	0.906541	0.962393	0.708842	0.92343	0.895562	0.953915	1.07162	0.691406	0.800349	0.949504	1.07777	0.801592	1.04735	1.08821	1.15975	0.880501	1.03584	1.07399	0.830702	1.24736	0.895857	0.779183	0.776015	0.935472	0.971603	0.85817	0.904718	0.998083	0.928346
A6NHU9	SHANK2	220	1	1.14693	1.14326	0.937841	0.960045	1.03142	0.959464	0.881125	0.962122	1.03416	0.993871	1.05666	1.13103	1.22843	1.02787	1.14606	0.893387	1.04381	0.861276	0.976796	0.933311	0.92811	0.969267	0.931654	0.936996	0.829775	0.890897	0.997764	0.974989	0.992073	1.00945	0.996353	1.04401	0.900802	0.992808
A6NHX0	CASTOR2	83	1	1.02372	1.02092	1.04369	1.03514	0.902353	1.03655	1.07693	1.06908	1.43003	1.10927	1.07731	1.15035	1.263	1.17158	1.06226	1.01286	1.02269	1.0977	1.00167	1.05717	1.02841	0.99098	1.01096	1.06281	1.0023	0.984317	0.851192	0.959685	0.975513	0.910693	0.825667	1.05364	1.00376	1.0178
A6NIH7	UNC119B	39	1	1.06806	1.08116	1.13356	0.992411	0.972048	0.990226	0.984427	1.11542	1.26652	1.23687	1.09093	1.00199	1.17675	1.16883	1.07134	1.15447	1.16921	1.0393	1.02396	0.825739	0.814673	0.773647	0.821772	0.947827	1.06928	1.05397	0.95832	0.963398	0.863434	0.955185	0.847853	0.918112	0.922581	1.08894
A6NIK2	LRRC10B	11	1	1.02015	1.18523	0.823494	0.745446	0.607591	0.717247	0.797802	0.894981	1.03863	1.02848	1.16538	0.848423	1.03935	0.823618	0.80287	0.799185	0.884984	1.04551	1.3919	1.05548	0.812658	0.966044	1.4035	0.829756	0.827147	1.00599	1.08107	1.09367	1.2929	0.92147	1.0941	0.78732	0.602816	0.705025
A6NIW2	DOCK11	2	0.9999	1.15669	0.804183	NA	0.789182	0.913642	1.07006	NA	NA	NA	NA	NA	0.726837	1.14748	NA	NA	0.8444	NA	NA	1.43593	0.884093	0.773526	NA	NA	0.949687	0.964512	NA	1.59674	NA	NA	NA	1.55165	NA	1.82466	1.01886
A6NJ78	METTL15	3	1	0.922698	NA	0.488014	1.0345	0.842383	NA	NA	NA	2.10424	1.88051	1.20062	0.67847	NA	NA	NA	0.84634	NA	0.739766	NA	NA	0.996781	0.687924	0.774381	NA	1.1594	NA	NA	NA	1.00848	NA	NA	1.96333	0.960995	1.07428
A6NJT0	UNCX	5	0.9938	NA	1.09147	0.909402	NA	NA	1.00214	1.21485	1.07828	1.02272	1.08102	1.05779	NA	1.19026	0.959921	1.1269	NA	0.93377	1.35005	1.1793	1.85925	NA	1.16367	1.71513	1.15586	NA	0.930571	1.08708	0.856691	1.22872	1.0623	1.38073	1.37846	NA	NA
A6NK58	LIPT2	7	1	0.487613	1.15621	1.21871	1.16446	0.727157	0.999063	0.605594	0.481788	1.01085	0.880639	1.02159	0.604878	1.32477	0.750533	NA	0.801339	0.482403	1.14304	0.978096	1.06963	1.25868	1.09017	0.970365	1.1825	0.76663	0.45404	1.07787	1.14176	0.938123	0.618664	0.852822	1.02812	0.981044	1.02292
A6NKD9	CCDC85C	16	1	1.00707	1.20112	1.00122	1.15935	0.9145	0.9169	1.05417	0.827155	1.00078	1.07919	1.136	1.16429	1.17328	0.905496	0.909732	0.911804	0.935369	1.13778	0.930776	0.935847	1.19588	1.00563	1.1002	1.02687	1.02226	0.991767	1.05009	1.09955	1.2141	1.0725	1.06424	0.886808	1.12167	1.1115
A6NKF7	TMEM88B	23	1	0.877343	0.839592	0.913115	1.07672	0.978811	1.02447	0.848264	1.04524	0.976044	1.16483	1.00627	1.10889	0.839491	0.847639	1.02989	0.858869	0.866646	1.12321	1.10243	1.34408	1.2207	1.32775	1.32675	1.40764	1.23453	0.845064	1.05982	1.16183	1.3976	1.31693	1.36242	1.47098	1.65149	1.41281
A6NKN8	PCP4L1	41	1	0.656174	0.795452	1.07912	0.762019	1.01815	0.856746	0.831549	0.846209	0.967325	1.25416	0.911423	0.881559	0.905165	1.122	1.00626	0.854539	0.944164	1.1371	1.21638	1.20663	1.21763	1.14906	1.53174	1.1813	0.866944	1.05205	1.28427	1.40193	1.06638	1.05488	0.946366	1.12922	1.04578	0.777862
A6NL88	SHISA7	74	1	0.98556	0.939089	1.00819	0.954894	0.917701	0.978804	0.923026	0.949133	1.10745	1.07242	1.15018	1.05673	1.00305	0.95513	1.04783	0.914514	1.10953	0.921458	1.07971	1.21486	1.10738	1.17028	1.12845	1.14308	0.958738	1.02272	1.06699	1.24191	1.10966	1.27275	1.26189	1.39841	1.28873	1.34216
A6NLU5	VSTM2B	24	1	0.767668	1.13787	0.903032	0.841935	0.899898	1.02013	0.950178	0.850921	1.22663	1.21635	1.07472	1.36058	1.19649	0.999398	0.880699	0.837749	0.955625	1.08925	1.32263	1.40755	1.20743	1.27856	1.18564	1.22888	0.904044	0.823766	1.06628	0.973569	1.26841	0.978443	1.30175	1.26798	1.16677	1.23371
A6NN73	GOLGA8CP	2	0.9954	NA	1.07534	1.05219	NA	NA	1.49326	NA	NA	0.947601	0.843352	1.04134	NA	0.998546	NA	NA	NA	NA	1.12807	0.963077	1.17232	NA	1.05505	1.11087	1.07882	NA	NA	1.03559	NA	1.09363	NA	1.24889	1.05889	NA	NA
A6NNZ2	TUBB8B	25	0.9998	0.964032	1.14945	0.919357	0.812404	1.01654	1.06998	0.899155	1.04184	1.02316	0.923744	0.99003	1.02767	0.93015	1.05372	1.14157	0.893506	0.999121	1.00031	1.03766	0.787081	0.644486	1.03784	1.03104	0.836836	0.698774	0.9642	0.685703	0.874218	1.05377	0.710601	0.776871	0.996603	0.660291	0.901165
A6XGL0	YJEFN3	55	1	1.38266	1.44443	0.784507	1.03296	0.986028	0.7742	0.744408	0.836242	1.0048	1.03319	1.03877	1.22107	1.60396	1.05586	1.17253	1.17613	1.25045	0.461923	0.647406	0.811645	0.889563	0.879416	0.906393	0.83743	0.869642	0.842774	0.893481	0.613857	0.998832	0.786473	1.25607	0.86928	0.855036	0.954541
A6ZKI3	RTL8C	65	1	0.702696	1.09923	0.865776	0.845617	0.921744	0.994963	0.986011	1.0521	1.04638	1.34551	1.02195	1.16905	1.11065	0.875295	1.00985	0.81008	1.04362	1.24747	1.13541	0.978752	0.989581	0.728416	1.00249	1.01511	0.943949	0.966291	1.02349	0.841235	1.11375	0.849387	0.804107	0.91548	0.966476	1.04369
A7E2V4	ZSWIM8	7	0.9923	0.92295	0.807148	0.757022	0.847789	1.37101	0.939947	1.28491	1.23082	0.844669	1.06173	0.958789	1.37433	0.926551	1.13613	1.10543	1.47065	1.3734	0.986405	1.02208	1.45974	1.20404	0.957833	1.11581	1.15725	1.31897	1.34838	1.10498	1.56525	1.36067	2.00391	1.88197	2.04145	1.87711	1.87768
A7E2Y1	MYH7B	8	0.9781	0.88004	0.835641	1.02541	1.03176	1.20315	1.08914	1.08806	1.00967	0.829248	0.960193	1.03405	0.877394	1.10311	1.05493	1.03946	1.05887	0.983735	0.977402	1.15455	1.06691	1.30596	1.27758	1.24209	1.17502	1.15759	1.19469	1.14598	1.2054	1.17875	1.23271	1.11981	1.40503	1.38318	0.981638
A7KAX9	ARHGAP32	114	1	1.02958	1.0492	0.945126	0.894188	0.965329	0.971269	0.962919	1.0172	1.11513	1.07534	1.08969	1.08941	0.967232	1.11925	1.07075	0.911644	0.987492	1.0562	1.07819	1.09672	1.0781	1.07015	1.03023	1.12907	0.959541	0.916992	1.05735	1.14681	1.061	1.33608	1.16055	1.31199	1.22826	1.18569
A7XZE4	TPM2	46	1	0.674429	1.52157	0.69338	0.688508	0.632626	0.761244	0.84453	3.86568	0.889831	1.10902	0.689245	0.733311	0.659885	0.906753	0.649916	1.1292	0.605922	0.691206	0.727968	0.880383	1.60679	1.23842	1.19312	0.977719	1.10397	0.911399	2.62665	1.6196	2.54671	0.977587	0.970213	1.00201	1.09157	1.36201
A8CG34	POM121C	5	0.9987	0.440243	NA	0.880219	0.659202	1.07259	NA	0.965886	0.694273	1.16179	1.33583	1.24375	1.06888	NA	0.774913	0.882557	0.609592	0.775024	1.36676	NA	NA	1.18752	1.1687	1.1097	NA	1.0612	0.74552	NA	0.971701	1.37205	0.897047	NA	1.2127	1.78954	1.88798
A8K2U0	A2ML1	14	1	0.441674	1.01609	2.05424	0.681438	0.800238	1.14151	NA	NA	0.867316	0.876366	0.9229	0.507496	1.07675	NA	NA	1.00015	NA	0.996263	0.973076	1.75288	1.13785	1.18098	1.03469	1.17777	0.982498	NA	0.973187	NA	1.27795	NA	1.30024	1.61466	1.07349	0.767217
A8K7Q2	HSPA8	358	1	1.92571	1.24755	1.43834	1.27728	1.23599	1.08712	0.905063	0.880981	0.764407	0.615121	0.868472	0.885838	1.15944	0.934195	0.975571	1.21593	0.823869	0.783895	0.726136	0.589115	0.746729	0.715295	0.613112	0.640548	0.749252	0.969752	0.770995	0.699725	0.624203	0.749434	0.629207	0.670129	0.679641	0.705783
A8K968	EPB41L3	63	1	1.08729	1.10047	1.03858	0.917587	0.959389	1.09637	0.906179	1.15082	1.05685	1.06894	1.04516	1.03927	1.16265	1.09831	1.20348	1.08038	0.974138	0.905366	1.22058	1.04259	0.796597	0.88267	0.776131	1.00718	0.888147	0.818409	1.0305	0.844761	0.920136	0.917554	1.14359	1.08952	0.749582	0.888462
A8MPS7	YDJC	10	1	1.28085	0.695969	1.61623	0.89203	1.24675	0.857646	0.970332	0.887175	1.13228	0.828007	1.81674	1.0502	0.778249	0.887952	1.18116	1.18149	1.06588	0.751665	1.05723	1.01162	1.18092	1.44415	2.67251	0.978639	0.857512	1.20626	1.21251	0.646107	3.07889	0.960529	1.10613	2.33915	1.30237	1.17073
A8MQ02	AFDN	8	1	0.861391	0.915913	1.02546	1.01225	1.06336	1.18091	0.999424	0.871763	1.03412	1.10107	1.03399	0.929348	1.03652	0.834598	0.883219	0.979827	0.899417	1.12736	0.997527	1.31471	1.19442	1.29771	1.2426	1.1759	1.14547	1.07574	1.00996	1.11804	1.23167	1.30571	1.53669	1.3369	1.36691	1.308
A8MSP2	RAB37	52	1	1.00716	1.03647	0.901376	1.08697	0.78043	1.07568	0.955585	1.04514	1.24152	0.927498	0.794662	1.11092	1.44075	1.04286	0.832251	1.08212	1.10438	1.30583	0.885206	1.0354	0.74927	0.937546	0.848734	1.05584	1.23385	0.982277	1.09409	0.873797	0.927602	0.845309	0.953925	0.866052	0.955958	0.832171
A8MTJ3	GNAT3	5	1	NA	0.597017	0.75573	NA	NA	1.12684	0.920118	0.942138	0.809036	0.78906	0.782213	NA	0.861326	0.897153	0.673954	NA	0.35626	0.911184	1.78147	1.14981	NA	0.874498	0.905581	1.10781	NA	0.817009	1.32436	0.989362	0.972773	0.761559	1.63895	0.904202	NA	NA
A8MTT3	CEBPZOS	15	0.9993	1.11912	0.955219	1.02315	1.08852	0.899748	0.711955	1.18936	1.27197	0.982319	0.84362	0.896553	1.04733	1.04898	1.10832	1.1608	0.972953	1.0022	1.02806	0.662188	1.6638	1.18933	1.16928	1.26385	1.3197	1.29908	0.922016	0.79099	1.25885	0.871207	1.66043	0.624368	0.62086	0.837588	0.879083
A8MU93	C17orf100	17	1	0.54688	0.939228	0.774843	1.28001	0.959802	1.01529	1.02521	1.6644	1.23742	1.26824	1.10324	0.968947	0.852952	1.00745	0.953791	0.913976	0.96752	1.2164	1.06547	1.12599	0.957803	0.874251	1.16114	1.01505	1.0005	0.797679	0.707428	0.711109	1.00022	1.17054	1.26283	1.37792	1.60098	1.16662
A8MUK1	USP17L5	15	0.993	1.09024	0.88033	0.957178	0.933163	0.849863	0.769929	0.538612	0.996691	0.796755	0.971866	0.996236	0.963648	0.765802	0.656632	0.772239	1.16668	1.68633	0.833966	0.909622	0.810146	1.16725	0.757062	0.862257	0.982544	2.83653	1.53591	1.27129	0.801101	1.36528	1.22693	1.92714	1.14645	2.00162	2.03005
A8MUT9	DLG2	2	0.9999	1.38316	NA	1.08962	1.45501	1.59131	NA	NA	NA	0.883537	1.03531	0.646822	1.23696	NA	NA	NA	1.12412	NA	1.12848	NA	NA	2.16993	0.906697	1.27243	NA	1.27367	NA	NA	NA	1.02182	NA	NA	2.20726	1.38002	1.61609
A8MVW0	FAM171A2	122	1	0.987987	1.06641	1.02928	0.898417	0.962991	0.95512	1.06431	1.04254	1.07769	1.095	1.03337	1.23754	0.969778	1.04596	1.18481	0.994136	1.01728	0.955747	1.07594	0.974527	0.950809	0.941937	0.976456	1.0142	0.875085	0.871335	0.981713	0.924777	0.944472	0.975226	0.921725	0.957789	0.99956	0.971293
A8MVZ9	ALDOC	489	1	1.34495	1.12898	1.0726	1.16596	1.11282	1.04041	1.10098	0.887308	0.945967	0.776524	0.93254	0.990725	1.18053	1.0503	0.997918	1.04112	1.02068	0.921351	0.890405	0.843642	0.829661	0.915576	0.803745	1.00062	0.906682	1.10994	0.98113	0.890893	0.678902	0.900193	0.696944	0.67271	0.659151	0.722838
A8MW92	PHF20L1	21	0.9999	0.621969	0.881692	0.93727	0.954328	1.02159	1.26064	1.05578	0.899968	0.850347	0.964888	0.95855	0.850244	0.84395	1.17905	0.840356	0.971498	0.949415	1.74591	1.38686	0.971281	1.08983	1.01894	1.07903	1.06094	1.22423	1.1477	1.32969	0.769135	1.09152	1.26817	1.08045	1.27115	1.20822	1.2528
A8MWD9	SNRPGP15	70	1	0.609267	0.831743	0.831707	0.86795	0.794624	0.987154	0.881396	0.940969	1.43938	1.62422	1.15996	1.0779	0.932657	0.992079	0.963035	0.725367	1.30563	1.04022	1.19221	1.32836	0.883961	0.934247	1.12691	1.07839	1.19925	1.00484	1.27354	1.20064	1.03587	0.980003	0.927901	0.932425	1.1075	0.854643
A8MXP9	MATR3	350	1	1.20697	1.08572	0.880611	0.922181	1.11388	1.03888	0.872683	0.945728	1.07406	0.977678	0.9981	1.0848	0.847934	0.885668	1.13982	0.973337	1.1484	1.06764	0.93636	0.840425	0.822706	0.650908	0.820723	0.833863	0.882809	0.934699	1.21516	0.755966	0.854732	0.867981	0.768265	0.883555	0.912172	0.942675
A8MXT2	MAGEB17	1	0.9547	NA	NA	1.38288	NA	NA	NA	NA	NA	1.0602	0.968405	0.838179	NA	NA	NA	NA	NA	NA	0.874522	NA	NA	NA	1.00498	0.705762	NA	NA	NA	NA	NA	0.63699	NA	NA	0.549683	NA	NA
A8MXV4	NUDT19	22	1	0.765879	0.882442	0.899313	1.16794	0.93416	1.09196	0.96398	0.998661	0.80491	1.04635	1.05452	0.912419	0.96442	0.890604	0.902957	1.06034	0.890949	0.963374	1.21526	1.26564	1.34758	0.917341	1.08011	1.08614	1.13541	0.874446	0.988923	1.08607	1.37754	1.10119	1.30234	1.11617	1.21581	1.40516
A8MZH3	MBP	1	0.9869	NA	NA	1.04168	NA	NA	NA	NA	NA	0.979141	1.06821	1.15994	NA	NA	NA	NA	NA	NA	1.80703	NA	NA	NA	1.51048	1.28501	NA	NA	NA	NA	NA	1.32497	NA	NA	1.25429	NA	NA
A9UHW6	MIF4GD	41	1	1.17239	1.0568	1.1037	0.984095	0.995836	0.873138	0.932499	1.03451	0.949144	1.10055	0.93965	1.07012	1.03126	1.13095	1.03061	1.16726	1.0332	1.02867	0.886449	0.755966	0.931369	0.83676	0.726344	1.05225	1.09852	1.15058	1.07382	1.15235	0.664413	0.754781	0.665822	0.663124	0.682051	0.777212
B0QY91	MICALL1	25	1	1.03799	0.948028	1.06898	0.966058	0.889131	0.99612	1.03646	0.942345	0.850557	1.06333	0.99887	0.792399	1.00873	0.997593	0.860512	0.969561	1.0073	1.08431	0.928943	1.02981	1.07119	1.16656	1.07559	1.01025	0.972011	1.28633	1.04297	1.11088	1.04905	1.1796	1.38854	1.32508	0.896691	1.16996
B0QYM5	TNRC6B	1	0.9986	0.885017	NA	NA	0.796838	0.943504	NA	NA	NA	NA	NA	NA	1.02293	NA	NA	NA	0.696078	NA	NA	NA	NA	1.34964	NA	NA	NA	0.944926	NA	NA	NA	NA	NA	NA	NA	1.11111	1.21139
B1AH77	RAC2	18	1	0.936027	0.965214	1.14481	1.03381	0.975482	1.16647	1.21976	1.27674	1.02319	1.01659	0.980734	0.944324	0.827507	1.03088	1.05384	0.999667	0.956633	1.0792	1.02374	0.948879	1.02318	1.03849	1.04379	1.09615	1.20834	1.06267	0.97196	1.11048	1.57567	1.13105	1.28793	0.972366	0.85526	1.13545
B1AH94	APOL1	41	1	0.708596	0.845091	0.831344	0.802373	1.18669	0.941141	0.843075	0.806215	0.810512	0.716261	1.08087	1.05139	0.955098	0.796396	1.06252	1.03283	1.0453	1.02609	1.26178	1.30546	1.26184	1.1959	1.29963	1.33125	1.10537	1.0779	1.22518	1.40472	1.68935	1.24798	1.11541	1.31228	1.06338	1.02924
B1AHD3	PDXP	6	1	1.20399	1.88848	0.71364	0.977741	1.24899	1.22956	0.965597	0.897178	0.723874	0.888953	0.974323	1.4787	1.91315	0.991932	0.866864	0.97071	1.01589	1.04434	2.57594	1.00175	1.64312	0.648416	1.26078	2.06377	1.24566	0.883941	1.26477	1.28715	0.96253	0.894716	1.63749	0.99553	0.796857	1.39575
B1AHL2	FBLN1	68	1	1.0118	0.890101	1.09229	1.10134	1.03807	1.05504	0.946009	1.11727	1.01823	1.11677	0.905545	0.960901	0.915641	0.972415	0.933273	1.10202	1.24089	0.96191	1.10549	0.949517	1.09335	1.18406	1.01277	0.978454	1.10069	1.16177	0.979614	1.12673	1.09752	1.16548	1.05786	1.05961	1.25254	1.16507
B1AL88	NALF1	3	0.9998	0.617994	0.832648	NA	0.892227	0.865915	0.752237	1.1006	0.883226	NA	NA	NA	0.903377	0.911969	1.58476	1.26055	1.00692	1.47048	NA	0.807637	0.627872	1.18351	NA	NA	1.10662	1.19255	1.4665	1.07634	1.81676	NA	2.12194	0.282366	NA	0.822834	1.55162
B1ALD9	POSTN	29	1	0.699049	0.909082	0.729025	0.960389	1.02033	1.10885	1.07673	1.63791	0.706797	0.870214	0.81876	0.995402	0.943963	0.947738	0.949748	1.12714	1.13457	0.938406	1.4501	1.36264	1.21705	1.48066	1.48663	1.10028	1.07376	1.07886	1.46682	1.39807	3.7656	1.20137	1.53542	1.07752	0.656309	1.30197
B1APG0	PRKACB	2	1	1.60658	NA	NA	1.0737	0.770337	NA	NA	NA	NA	NA	NA	1.00854	NA	NA	NA	0.941068	NA	NA	NA	NA	0.81892	NA	NA	NA	0.642222	NA	NA	NA	NA	NA	NA	NA	0.89705	0.728742
B1APG3	PRKACB	4	1	1.16625	NA	0.995619	0.7743	1.15495	NA	1.13135	1.10405	0.833289	0.767292	0.98332	0.818936	NA	1.40067	1.18998	0.763983	0.834306	0.837892	NA	NA	0.919386	0.991645	0.900212	NA	0.822812	0.824245	NA	1.03908	0.960425	1.26003	NA	0.928471	0.894226	0.835431
B2RBV5	MRFAP1L2	4	0.9999	NA	0.884422	NA	NA	NA	1.02969	1.36049	1.71375	NA	NA	NA	NA	0.941338	1.09584	1.05543	NA	0.770795	NA	1.23645	0.950988	NA	NA	NA	1.12374	NA	1.10036	0.807023	1.19439	NA	0.962985	0.740895	NA	NA	NA
B2RTY4	MYO9A	6	0.9966	0.687434	1.01591	0.9088	0.946338	0.822687	1.10992	1.00402	1.07201	0.8199	0.850349	1.07465	0.758809	0.8031	0.944372	0.950063	0.772057	0.93765	1.3229	1.16237	1.13892	1.48427	1.42065	1.3823	1.20393	1.16037	0.938448	0.988034	0.85436	1.30217	1.22225	1.24046	1.32277	1.03873	1.00578
B2RUZ4	SMIM1	14	1	0.853536	1.02817	0.879539	1.03498	0.960173	1.24714	1.08163	1.06184	1.17441	0.986141	1.23564	0.9442	0.939747	0.834961	0.960187	0.857365	0.967322	1.27891	1.31295	1.60193	1.30688	1.51532	1.2078	1.1496	1.00031	1.237	1.31011	1.47955	1.42664	1.24633	1.33496	1.74928	1.39855	1.26908
B3KU38	IQCJ-SCHIP1	19	1	0.905696	0.913139	1.12279	0.951044	0.921562	1.16432	0.681035	1.09991	1.16172	1.08895	1.21282	1.04816	1.1442	1.24732	0.988863	0.828735	0.976806	1.27164	1.01306	1.22209	1.10931	1.48631	1.31967	1.19571	1.28575	1.00232	1.19881	1.18855	1.27804	0.997391	1.28521	1.3462	1.04998	1.15613
B3KVK2	GNB1	2	1	1.53531	NA	NA	0.869932	0.831981	NA	NA	NA	NA	NA	NA	0.824272	NA	NA	NA	1.2433	NA	NA	NA	NA	0.609386	NA	NA	NA	0.526868	NA	NA	NA	NA	NA	NA	NA	1.41661	1.01763
B3KW56	EIF3E	7	0.9999	1.07196	0.990375	0.987495	0.974431	0.865495	0.986273	0.913564	0.797775	0.979334	0.922918	1.15195	0.878186	1.11089	1.24118	1.01956	1.19402	1.03116	1.01755	1.2939	1.18062	1.20398	1.04748	0.932486	1.18579	0.961781	0.796394	1.14554	0.970327	1.30416	0.991996	1.29007	1.22319	1.20045	1.41854
B4DDD6	DBNL	10	1	1.84413	1.49488	1.10967	0.664709	0.753503	0.954294	0.634811	1.00893	1.47304	1.05639	1.04477	1.37795	1.48882	1.19393	1.25441	1.06902	1.13455	0.433614	0.852208	0.582512	0.221961	0.261655	0.307795	0.833188	0.30113	0.708677	0.929016	0.36597	0.233231	0.245071	0.282521	0.368659	0.190658	0.307138
B4DED4	HAGHL	71	1	0.763069	0.843952	0.78462	0.919547	0.941031	0.94621	1.10328	0.990437	1.08513	1.05989	0.977764	1.02563	0.890151	1.06855	0.939158	0.97116	1.10713	1.17302	1.09749	1.07624	1.15786	1.00477	1.11768	1.01738	1.0817	1.09498	1.01011	1.07603	1.05115	1.02365	0.848271	0.953232	1.03958	0.98223
B4DEH8	PABPN1	52	1	0.862354	0.93622	0.889783	0.856816	1.05686	0.946774	0.92996	0.958745	1.2871	1.33536	0.9486	1.09836	0.96947	1.27707	1.04606	0.986412	1.04506	0.917163	0.844054	0.804444	0.8746	0.768242	0.645785	1.0136	1.09281	0.733374	0.983535	0.785023	1.02271	0.761015	0.99924	1.10552	1.20185	1.15686
B4DFI3	CELF5	21	1	1.1148	0.99707	1.00274	0.880129	1.07972	1.02105	0.852133	0.776293	0.896074	0.955627	1.0926	1.26047	1.07528	1.14182	1.21549	1.01539	1.17301	0.829268	1.03028	0.896693	0.739702	1.00217	1.1076	1.05581	1.21208	0.887024	1.22221	0.764799	0.783737	0.912748	1.08919	1.17159	0.870335	0.89993
B4DH19	NSF	26	1	1.38574	0.779742	0.897678	1.08605	0.987766	0.911005	0.888848	0.997047	1.18583	1.12955	0.972878	0.841818	1.14238	0.978637	0.878468	0.920142	1.02748	1.15919	0.974156	1.15416	1.09369	1.08523	0.940673	1.07097	1.16475	0.8462	0.983238	0.811214	0.971677	1.00244	1.07564	0.98809	0.861793	0.935989
B4DJ07	EXOC7	4	1	1.68293	1.14386	NA	1.04988	1.0544	0.914914	0.82438	0.923565	NA	NA	NA	1.1005	1.00356	0.897011	0.828517	1.15774	1.02686	NA	0.899068	1.029	1.01237	NA	NA	0.851516	0.967845	0.809941	0.940357	0.621235	NA	0.951381	1.38844	NA	1.1531	0.939297
B4DJ75	PPP1CB	5	0.998	0.848884	0.897313	0.995054	0.955827	0.85518	0.964262	0.878642	0.932812	1.03509	1.08922	0.954537	0.970434	1.02831	0.935196	0.843221	0.961683	1.00143	1.04396	0.99529	1.18063	1.32405	1.18543	1.03293	1.24325	1.24902	1.05661	1.00579	1.10745	0.671775	1	0.892172	0.908596	1.23786	1.11752
B4DJY2	TMEM233	1	1	0.967673	NA	NA	0.744167	1.01998	NA	NA	NA	NA	NA	NA	1.07203	NA	NA	NA	0.797122	NA	NA	NA	NA	1.01161	NA	NA	NA	1.14815	NA	NA	NA	NA	NA	NA	NA	1.15914	0.987786
B4DKD1	TTYH2	32	1	0.872614	0.942465	0.98639	1.17011	1.17569	1.05326	1.24496	0.963241	0.877796	0.907128	0.976135	0.859656	0.844918	0.977178	0.907445	0.944877	0.91089	1.15405	1.01919	1.23085	1.03995	1.11509	1.1199	1.11932	1.20881	1.13523	0.973183	0.979576	1.09288	0.958302	1.02947	1.07168	1.21903	1.51109
B4DKF8	PSD3	294	1	1.76258	1.1248	0.871598	0.963546	1.02849	0.992065	0.882536	1.03521	1.2075	0.973909	0.989501	1.19503	0.990135	1.38002	1.12568	1.01257	0.956947	0.754225	0.746503	0.944008	0.803397	0.696534	0.693741	1.04239	0.821457	0.76061	0.939298	0.913323	0.777727	1.20988	1.12176	1.22404	1.0087	0.956111
B4DLN1		84	1	1.06235	0.99141	1.1561	1.06207	0.977308	1.0842	1.1074	1.13576	0.935566	0.864646	0.906002	1.01832	0.973847	1.0233	0.956094	1.15848	0.909708	1.03376	0.781959	1.04033	1.12234	1.09187	1.15907	1.09224	1.00349	1.06338	0.925058	0.996909	0.86559	0.857459	0.80569	0.826814	0.901457	0.7539
B4DP61	SMN1	10	1	1.37231	1.01246	1.28091	0.999132	1.11165	0.998551	0.853841	1.06005	1.03422	1.07003	1.08218	1.20366	1.34142	1.20258	1.20797	1.0962	0.965028	0.746078	1.10879	0.918503	0.670334	0.773428	0.634409	0.991941	0.78616	0.869951	0.99078	0.91708	0.53204	0.861369	1.05314	0.664533	0.731043	0.672564
B4DR80	STK24	137	1	1.33766	0.993361	1.10199	0.965861	0.973888	0.899472	1.12204	1.00762	0.909795	0.952691	0.903501	1.04777	0.96694	1.09455	0.978292	1.12486	1.00559	1.0039	0.85171	0.870382	1.03316	1.01817	0.832424	0.992576	1.04429	0.982506	0.903316	1.02516	0.94119	0.92428	0.880415	0.851074	0.853124	0.817501
B4DS77	SHISA9	13	1	0.833814	1.14895	1.08887	0.861828	0.802206	0.914425	1.20696	1.16807	0.923244	0.990976	0.840441	1.14619	1.2808	1.18053	1.10473	0.796875	1.12689	0.850568	0.960259	0.998201	1.21898	1.12508	1.11836	1.18522	0.961821	0.962632	1.12045	1.30174	1.04016	1.13306	0.928523	1.26791	1.08624	1.08507
B4DVD8	CASP1	3	0.9978	0.75831	0.799121	1.08006	1.12046	1.05242	0.863142	NA	NA	0.916218	1.14644	1.11428	1.04553	1.05237	NA	NA	1.06339	NA	1.04822	0.935447	1.17603	1.37083	1.24579	1.3811	0.981877	1.21523	NA	1.03259	NA	1.3586	NA	1.10261	1.21478	1.39473	1.33829
B4DX77	NICN1	7	1	1.08109	1.01337	1.02101	1.21515	1.20401	1.22668	0.975807	0.833448	0.917914	1.04306	1.0935	1.05763	1.07366	1.03384	0.943063	1.07368	0.824001	1.00884	1.26678	0.748615	1.37849	0.94128	0.959536	0.983849	1.16487	0.882223	1.11752	0.878871	1.13529	1.2759	0.88832	1.15402	1.5369	1.26386
B4DY08	HNRNPC	8	1	0.932933	0.923808	0.896661	1.01607	1.0514	1.25849	0.842921	0.861157	0.846325	0.95662	0.98572	0.84032	0.995688	0.943944	0.979633	1.11246	0.990981	1.14401	1.05689	1.09456	1.23553	1.10711	1.07853	1.06587	1.1263	1.09873	1.09986	1.0155	1.10684	1.10123	1.27857	0.966275	1.03059	1.17758
B4E171		65	1	1.23433	0.868051	1.16249	1.09449	0.912438	1.07762	1.41178	1.04296	1.30797	1.11804	1.02999	1.23988	0.969414	0.911265	1.12319	0.952545	0.944001	0.990748	1.13485	1.36554	1.08597	1.10294	1.06454	1.35262	0.872938	0.928012	1.03317	1.17592	0.956205	0.893447	0.814557	0.940509	0.873051	0.814584
B4E1Z4		162	1	0.889774	1.50691	1.05925	0.841401	1.12342	1.14285	0.988129	0.852422	1.05775	0.835291	0.922448	1.13868	0.881187	0.842067	0.925626	1.36065	1.01778	1.01355	1.06457	0.861256	0.896388	1.04846	1.01873	0.891932	0.769317	0.918005	1.0621	1.3448	0.892828	1.27799	0.858592	0.925055	0.926464	1.04357
B5MBX5	LBH	6	1	0.970036	1.04258	1.29933	0.91189	1.15259	0.852087	1.07808	0.93006	1.01228	0.960962	1.19334	0.909615	1.19334	1.0383	1.17125	1.02434	1.03811	1.02327	0.815921	0.705166	0.991902	1.24501	1.22822	0.784626	0.960123	1.01778	0.896069	1.09375	1.11189	1.10406	0.702175	1.10689	1.11045	1.07254
B5MCB4	MECP2	9	1	0.542626	1.01425	0.999036	0.943798	0.825685	1.42883	1.41481	0.827904	1.16003	0.960426	1.42115	1.30427	0.796003	1.12176	1.04788	1.09746	0.862126	0.74377	0.597388	0.833287	0.723991	0.88744	0.969819	0.706986	1.03779	0.700508	0.830169	0.45547	1.2409	1.3152	0.489002	1.38262	1.16164	1.08241
B5MCD5	DGKB	2	1	NA	1.05439	NA	NA	NA	1.17327	0.936928	1.02695	NA	NA	NA	NA	0.782353	0.802809	0.9748	NA	0.737823	NA	1.22488	1.28748	NA	NA	NA	0.995605	NA	1.01862	1.29298	1.03411	NA	0.985423	1.37612	NA	NA	NA
B5MCX3	SEPTIN2	30	1	1.37957	0.94473	1.05738	1.14482	1.03126	1.07622	0.778445	1.12124	1.08201	0.866075	1.09552	0.811255	0.942458	0.964042	0.798025	1.02329	1.03724	0.920575	0.612033	0.603588	0.849227	0.794972	0.705224	0.834721	1.61652	1.09832	1.06995	1.00352	0.768534	0.868685	0.614708	0.739499	0.831642	0.762471
B7WPA5	PLEKHB2	19	1	0.939466	1.17094	1.0116	0.970369	0.92107	1.13331	1.02334	1.06451	1.61072	1.18241	1.1516	1.02223	1.21706	1.04669	0.854537	0.918741	1.02423	1.07658	1.04753	0.844354	0.938633	0.881932	0.945842	0.859706	0.933528	0.920456	0.882899	0.669636	0.769598	0.795811	0.814711	0.876556	0.906529	0.958281
B7Z1P2	FBXO44	16	1	0.622098	0.875721	1.06061	0.761102	0.775629	0.97149	1.05405	0.998481	1.06842	1.40671	1.04799	0.917505	1.02075	0.966297	0.858483	0.928379	0.960867	0.830883	0.785038	0.902981	1.17464	0.88322	0.950807	1.0659	1.09681	1.09776	0.962903	1.25325	0.901428	1.24676	1.06889	1.10483	1.10359	1.06366
B7Z1Z5	NTM	97	1	0.902988	1.17066	1.0419	0.958377	1.06643	1.18135	1.25218	0.83396	1.24045	1.11276	1.11627	1.16285	1.19858	1.10411	1.18815	0.855742	0.956612	1.04464	0.863641	0.960262	0.736487	0.84292	0.79375	1.00155	0.623427	0.866455	0.984392	0.915267	0.774498	0.806628	0.499249	0.816769	0.654036	0.648234
B7Z493	FGD4	25	1	0.967779	0.72846	0.906516	0.901523	1.08503	0.979901	1.07703	1.13237	0.859692	0.991836	1.1476	0.953605	0.840848	0.887998	1.0227	0.902352	1.15894	1.49915	1.07806	1.30807	1.2195	1.51909	1.65242	1.03797	1.22232	1.30008	1.0937	1.09018	1.37566	1.2795	1.15153	1.53272	1.04329	1.20298
B7Z4H1	ABLIM1	249	1	1.06047	1.10885	1.00695	0.90908	0.964338	1.04411	0.952472	1.12735	1.06521	1.03683	1.0673	1.12056	1.03893	0.948256	1.00369	0.901995	0.980406	0.959813	1.06377	0.990165	0.974911	0.907294	0.881611	1.0123	1.09519	0.973575	0.956496	0.903402	0.961216	0.96001	1.13855	1.08705	0.884667	0.946635
B7Z613	GPM6B	75	1	2.49056	1.00156	1.39831	1.27265	1.09904	0.872796	0.996808	1.04731	0.870244	0.735579	0.812702	1.04502	0.96526	0.941745	0.833963	1.25971	0.73994	0.642741	0.872212	1.09021	0.859064	0.778858	0.805423	1.03589	0.762766	0.786387	0.729561	0.850513	0.712936	0.772044	0.971384	0.85301	0.766859	0.735887
B7Z647	DLG4	451	1	1.47738	1.06326	0.941735	0.931563	0.952617	0.921152	0.967903	0.888598	1.02768	0.944292	0.990657	1.12069	1.21691	1.47404	1.06579	1.05313	1.14862	0.996456	0.854843	0.743059	0.801931	0.782552	0.739868	0.948777	0.73347	0.81701	1.02794	0.786735	0.804467	0.887862	0.853412	0.909159	0.94542	0.91063
B7Z7F3	RANBP3	127	1	0.929088	1.0606	1.01497	0.843727	0.915465	0.977822	0.977155	0.954406	1.12836	1.16748	1.0402	1.05207	1.14545	1.01208	0.982135	0.947881	1.12909	1.06381	1.02368	0.979724	0.847944	1.03561	0.92446	1.05296	0.894176	1.03463	1.05572	1.04591	0.971756	0.844733	0.781164	0.79332	0.832601	0.796339
B7Z9C2	NAP1L1	3	1	NA	1.01222	0.857565	NA	NA	1.13685	0.822241	0.910912	0.882521	0.910672	1.00223	NA	0.911341	0.836862	0.886168	NA	0.933703	0.933825	1.24173	0.671865	NA	1.08245	0.947656	1.08472	NA	1.07526	0.91047	1.09887	0.977217	0.828045	0.786268	0.794154	NA	NA
B7Z9S8	ATP1B1	1	0.9991	NA	NA	0.869642	NA	NA	NA	NA	NA	1.08362	1.07311	1.35929	NA	NA	NA	NA	NA	NA	1.41574	NA	NA	NA	1.74917	1.49717	NA	NA	NA	NA	NA	1.85878	NA	NA	1.4773	NA	NA
B7Z9X4	NDRG4	24	1	1.17618	1.10072	1.13937	1.06594	1.09717	0.856052	1.15526	1.0687	0.842843	0.91804	0.979177	1.016	1.08056	0.928279	1.06452	1.0655	0.969024	0.971744	0.857824	1.15337	0.929721	1.01129	1.04922	0.996034	0.980826	1.11089	0.900343	0.967449	0.899349	0.965509	0.97037	0.958315	1.06048	0.925612
B7ZAQ6	GPR89A	2	0.9993	0.707088	NA	NA	0.871518	0.89148	NA	NA	NA	NA	NA	NA	0.86152	NA	NA	NA	0.811654	NA	NA	NA	NA	1.05303	NA	NA	NA	0.955865	NA	NA	NA	NA	NA	NA	NA	1.16883	1.31249
B7ZBB8	PPP1R3G	9	0.9975	0.990179	0.939199	1.05304	1.09083	0.918201	1.04667	0.908452	1.09445	1.32352	1.14721	1.1743	1.15528	1.14152	1.0356	0.910909	0.911793	1.088	1.38057	0.915147	0.94793	0.879974	1.16865	1.20993	0.941619	1.08869	1.10539	0.886302	0.925081	1.18766	1.01931	0.973586	1.10121	0.846283	1.06216
B7ZC39	SH3GLB2	8	1	2.03026	1.25851	1.25311	1.03865	0.815688	1.01046	0.705889	1.04165	1.01834	0.752814	0.832699	1.19257	1.20372	0.933835	0.798114	1.2017	1.05563	0.773043	0.660247	0.895111	0.764486	0.59164	0.631244	0.786214	0.673282	0.93025	0.760313	0.952364	0.48714	0.584931	0.800524	0.584026	0.546401	0.453145
B7ZCA0	SYNGAP1	23	1	1.08088	1.3756	0.861971	0.943776	1.03303	0.897256	0.872574	1.00365	0.937981	1.01962	0.959672	1.07636	1.21779	1.08977	1.08093	0.957252	1.14103	0.813006	0.974622	0.870936	1.10898	0.932311	0.953668	1.01156	0.847079	0.910607	1.03187	0.994507	1.06069	1.08535	1.11548	0.842077	0.98743	1.04292
B7ZW38	HNRNPCL3	10	0.9999	0.783745	0.961613	0.854311	0.841818	0.841971	1.1416	0.889386	0.998548	1.31692	1.32724	1.10694	1.06166	0.890616	1.13556	1.07631	0.951428	0.947661	1.21531	1.26065	0.670498	0.970333	1.07976	0.955237	0.906306	0.851977	1.01952	1.36626	0.700749	1.65646	1.14447	1.42741	1.63463	1.57078	2.40373
B8ZZ50	EIF4E2	100	1	1.05432	1.22282	0.99741	0.931899	0.986163	0.952319	1.00906	0.9458	1.20121	1.12873	1.09156	1.01182	1.10848	1.06788	1.01437	1.093	1.111	0.99068	0.924579	0.873774	0.88416	0.961904	1.05538	0.94336	0.880149	0.980495	1.09416	0.984525	0.87841	0.72497	0.751003	0.869529	0.769132	0.8944
B8ZZ87	MZT2B	22	1	0.7673	0.834572	0.974975	0.739312	0.924698	0.92862	0.783862	0.866716	0.920631	1.18972	1.11697	0.897471	0.942594	1.24691	0.937574	1.0689	1.09544	0.822109	0.862394	1.16904	1.22539	1.29236	1.00919	1.00081	1.3126	1.26121	1.13881	1.78361	1.01477	0.91559	0.726668	0.918273	0.701216	0.954466
B9A047	ASB1	5	1	NA	0.842426	1.03468	NA	NA	0.891532	1.05939	0.894935	0.866983	0.925971	1.01244	NA	0.911304	0.980808	0.961166	NA	0.864836	0.969982	0.919614	1.03689	NA	1.27322	1.16829	0.897949	NA	0.996214	0.810543	1.05203	1.08876	1.23314	1.21566	1.13289	NA	NA
B9A054	RHBDD1	1	0.9927	NA	NA	NA	NA	NA	NA	0.694293	1.20282	NA	NA	NA	NA	NA	0.86974	0.830535	NA	1.15146	NA	NA	NA	NA	NA	NA	NA	NA	1.17212	NA	0.615131	NA	1.19142	NA	NA	NA	NA
B9A058	HIBCH	10	1	1.46185	0.909601	1.07313	0.957975	0.951941	1.16749	1.16817	1.14717	0.975735	0.850482	1.02187	0.866814	0.86968	0.95338	1.02445	1.09969	0.914383	1.19847	1.16146	1.13685	0.747936	1.74429	1.0351	1.10153	1.30235	0.953123	0.878501	1.07425	0.81142	0.659982	0.757979	0.5677	0.538718	0.41606
B9A064	IGLL5	35	1	1.08622	2.06837	1.24149	1.46805	1.21648	1.35753	0.551453	0.535212	0.88569	0.59062	0.82868	0.858512	1.43937	0.770871	1.11813	0.861076	0.725458	1.10125	0.9269	1.3155	0.584345	0.8089	0.803135	0.971562	0.842775	0.915366	0.545728	0.999695	0.704998	0.705191	0.613501	0.671025	1.35638	1.22736
C4AMC7	WASH3P	58	1	0.970685	0.993015	1.06869	1.00134	0.986837	0.948892	0.956051	1.03948	1.11765	1.05768	1.07112	0.941704	1.02079	0.956439	1.05964	0.931979	1.04661	1.14799	0.955973	0.850034	0.875867	0.969138	0.840501	0.909813	0.907005	0.962012	0.976664	0.865094	1.03407	0.939387	1.0259	1.06635	0.79324	1.03832
C9IYV2	CAMK1G	2	0.9999	1.24841	1.09043	NA	0.91788	0.914233	0.869652	NA	NA	NA	NA	NA	0.888729	1.08397	NA	NA	1.05353	NA	NA	1.50279	1.16082	0.979395	NA	NA	1.3217	0.907661	NA	1.41317	NA	NA	NA	1.82396	NA	0.683268	0.975753
C9J069	AJM1	109	1	0.943126	0.938758	0.917914	0.968072	0.963461	0.972501	0.993309	0.998549	0.97714	1.05388	1.09379	1.0812	1.02639	1.00901	1.13933	0.899105	0.998665	1.0548	1.12	1.09782	1.05291	0.981956	1.09383	1.01016	1.02062	0.872939	1.0755	0.943422	1.08654	1.11761	1.38244	1.34901	1.11434	1.14749
C9J386	H2AZ2	4	0.998	0.63571	0.946974	NA	0.773011	0.89461	0.768185	1.53176	1.12741	NA	NA	NA	1.04042	0.823503	1.06846	1.29135	0.952592	1.32823	NA	1.26778	1.26382	1.03812	NA	NA	1.18518	1.1284	1.25692	0.918309	1.311	NA	1.33755	1.1365	NA	1.56626	1.18628
C9J3E7	DYNC1I1	33	1	1.14674	1.16624	1.21358	0.989165	1.02215	1.01244	0.806019	1.21451	0.966684	1.16638	0.952177	1.01606	1.23496	0.915681	0.908005	1.043	0.892503	0.941162	0.700615	0.804769	0.763945	1.07781	0.934851	0.823849	0.680576	0.837902	0.939618	0.721259	0.75157	0.476745	0.814938	0.697261	0.694429	0.799615
C9J406	IMMT	26	1	1.30199	1.05843	0.892791	1.0771	1.22039	1.05366	1.0569	1.1813	0.932352	0.853254	0.984086	0.953412	0.800199	0.822691	1.06748	0.940675	1.05472	0.854116	0.819691	1.24259	0.970074	0.802647	1.02829	1.06554	1.14605	0.808587	0.790447	0.898852	0.792095	1.02397	1.02064	0.794941	0.808319	0.788675
C9J4L5	CREB1	19	1	0.957976	1.10055	1.03068	0.896226	0.930001	1.04492	0.968895	1.03331	1.03184	1.13063	1.06855	0.834694	1.10324	1.05448	1.12536	0.921806	1.11487	0.87154	0.880379	1.00892	1.0103	1.01173	0.824528	0.990193	1.07239	0.858435	1.03014	1.11173	1.06965	1.00536	1.14929	1.15173	0.969544	1.22512
C9J4Z0	SLC22A23	30	1	1.59895	1.18012	1.54271	0.974083	1.0857	1.18384	1.29074	0.966489	0.863584	0.715091	0.842229	0.98145	1.11306	0.963746	1.00124	1.02468	0.825019	0.814787	1.11379	0.935421	0.934865	0.707364	0.680555	0.959348	0.814947	0.821154	1.07169	0.895868	0.56687	0.962696	1.23835	0.984546	0.997691	0.93998
C9J6H1	MBP	125	1	0.723305	1.20846	0.778287	0.801636	0.523501	1.22281	0.820701	0.806984	0.830908	0.611912	1.01309	1.05459	0.906546	0.752255	0.627874	0.74447	1.04548	2.33762	2.2618	0.481524	0.525909	0.622975	0.914029	0.614003	0.429919	1.68418	1.01532	0.376132	0.457068	0.506516	0.566172	0.486283	0.312409	0.332871
C9J6N9	UFD1	11	1	0.606076	0.837325	1.15206	0.94616	0.653376	1.1198	0.871085	0.756118	1.14916	0.851716	1.14807	0.587065	0.959261	0.769396	0.828315	0.881613	0.948024	1.81696	1.04033	1.4559	1.28507	1.16176	1.24617	1.08929	0.815596	0.825261	0.904475	0.915506	0.710811	0.793019	0.954608	1.01997	0.754018	0.800967
C9J798	RASA4B	22	1	0.817309	0.849117	0.758905	0.920414	0.937127	1.02237	0.970288	1.01537	1.01906	1.0084	0.754025	0.967273	0.960878	0.884487	0.885186	0.95498	1.28305	1.14678	1.31096	1.29625	1.4273	1.12676	1.03267	1.23042	1.32229	1.20738	1.11862	1.37537	1.19222	1.15834	1.52378	1.08758	1.17363	1.25495
C9J7B1	NIPSNAP2	3	1	0.895412	NA	0.952506	1.03221	1.01205	NA	1.40282	0.931326	1.28966	1.25905	1.1011	0.857578	NA	1.09688	1.09362	1.11638	1.17416	1.2174	NA	NA	1.2503	1.13054	1.27996	NA	1.21377	1.08673	NA	0.93693	1.09732	1.07123	NA	1.27721	1.1609	0.942551
C9J7I0	UMAD1	3	1	NA	1.15068	NA	NA	NA	0.971742	1.05865	1.06508	NA	NA	NA	NA	0.839775	0.951967	1.23872	NA	0.829073	NA	1.03382	1.00912	NA	NA	NA	0.780424	NA	1.07822	0.926552	0.976333	NA	1.23604	1.26679	NA	NA	NA
C9J7S3	DARS1	6	0.9985	1.27744	NA	0.964015	1.27562	1.00706	NA	0.941868	0.940143	1.15413	0.995504	0.967029	1.18916	NA	0.908282	0.862725	1.00885	1.03913	0.99085	NA	NA	1.01924	0.825105	0.941217	NA	1.04767	1.01253	NA	0.849302	0.659895	1.01074	NA	0.691011	0.968195	0.725737
C9J7X6	DENND11	19	1	1.03731	0.96618	0.784994	0.967326	0.6971	1.09698	0.965513	1.10534	0.975516	1.05131	1.02693	1.04594	1.10527	0.89657	0.966223	1.10643	0.997359	1.03449	1.27669	1.26082	1.14628	1.12673	1.44868	1.3768	1.25545	1.20637	1.10907	1.11104	1.21743	1.41195	1.16455	1.03687	1.21287	1.04884
C9J8D8	SPEG	1	0.9997	0.645059	NA	NA	0.876772	0.946689	NA	NA	NA	NA	NA	NA	0.942209	NA	NA	NA	0.861986	NA	NA	NA	NA	0.778352	NA	NA	NA	0.93	NA	NA	NA	NA	NA	NA	NA	1.27881	0.99355
C9J8I8	WNT5A	1	0.9961	NA	NA	NA	NA	NA	NA	0.871564	0.86292	NA	NA	NA	NA	NA	0.835462	0.70464	NA	1.04955	NA	NA	NA	NA	NA	NA	NA	NA	0.972838	NA	1.11847	NA	1.82069	NA	NA	NA	NA
C9J8Z4	IGSF8	2	0.9994	1.16399	0.971662	NA	1.05972	0.902272	1.09429	NA	NA	NA	NA	NA	1.23527	1.15179	NA	NA	0.992021	NA	NA	1.07843	1.2039	1.12948	NA	NA	0.804182	1.1386	NA	0.981219	NA	NA	NA	1.08881	NA	1.37193	1.03159
C9JA17	ATP6V1A	4	0.9994	NA	NA	0.930626	NA	NA	NA	0.962278	0.892467	0.849549	0.794878	1.03406	NA	NA	0.937691	1.03835	NA	0.936286	1.03994	NA	NA	NA	1.03844	0.967847	NA	NA	0.904969	NA	1.05193	1.22495	1.43009	NA	1.31478	NA	NA
C9JA33	PALM2AKAP2	160	1	1.0824	1.06524	1.04485	1.03558	1.05231	0.983229	1.01432	1.20367	1.09513	1.10453	0.952272	1.10965	1.1459	1.03596	1.05668	1.02074	1.02294	0.789814	0.845962	0.913802	0.955298	0.906313	0.854331	1.02477	0.843195	0.898875	0.857818	0.972726	0.995394	0.946718	0.871901	0.811055	0.952221	0.845481
C9JA93	TBC1D15	8	1	1.30369	1.01513	0.817894	0.717796	0.698953	0.990164	0.88821	0.735477	0.993233	0.882222	0.760012	0.610074	1.08348	1.15776	0.935168	0.831659	0.928861	0.780897	1.09928	0.820428	0.807837	0.788641	0.573023	0.668519	0.812631	0.67484	0.844649	0.606545	0.873783	0.556672	0.726039	0.657273	0.916373	0.752362
C9JAI6	CMTM5	55	1	0.833999	0.780755	0.887986	1.04318	0.95384	1.05191	1.42166	1.30456	0.863782	0.89787	1.03129	1.0343	0.942705	1.14799	1.06409	0.893231	0.985897	0.963016	1.3156	1.12637	1.34052	0.954153	1.18084	1.26418	0.861511	1.03315	1.00853	1.22476	0.767126	0.852436	1.00184	0.751419	0.773558	0.926276
C9JAK5	ARF4	80	1	0.7766	1.012	1.03641	1.08877	0.948052	0.948067	1.04251	1.13293	1.454	1.30739	1.065	1.00869	1.04951	1.08606	0.990241	1.12273	1.07848	1.05591	0.872707	0.840172	0.816267	0.779775	0.870974	0.896249	1.06145	0.831897	0.915123	0.796679	0.883924	0.722781	0.792388	0.86454	0.734958	0.960815
C9JBE1	DNPEP	2	1	1.05794	NA	NA	1.00015	1.10512	NA	0.971836	1.0932	NA	NA	NA	0.801029	NA	1.11053	0.82724	1.07414	1.23902	NA	NA	NA	1.00906	NA	NA	NA	0.960107	0.829538	NA	0.98159	NA	0.845543	NA	NA	0.848831	0.969959
C9JC87	AP4M1	8	0.9998	1.26698	0.940566	1.06225	1.22897	0.963448	1.10334	0.876367	0.871236	1.3358	1.17715	1.25703	1.1474	1.11667	1.02643	0.877464	1.04423	1.22704	1.18554	1.25014	1.09564	1.07223	1.32777	1.12107	1.0709	1.53793	0.984268	1.04909	1.24828	1.28562	1.12169	1.08638	1.5034	1.3948	1.38041
C9JDL1	KHK	43	1	0.578137	0.806673	0.819598	0.907916	1.24579	1.13571	0.954362	0.804975	1.03513	0.881497	1.14744	1.13634	1.20286	0.989842	0.919874	1.11111	1.04496	0.827617	1.08011	1.24126	1.42733	1.04632	1.05996	1.02146	1.29914	1.17593	1.22798	0.812525	0.547643	0.704567	0.619774	0.754356	0.805901	0.677442
C9JEE0	IGLL1	4	0.995	0.511336	1.03341	NA	0.951157	0.949403	1.09889	0.75595	0.694427	NA	NA	NA	0.711728	0.640635	0.63318	0.446937	0.602976	0.778776	NA	1.69531	1.58882	1.0181	NA	NA	1.18538	1.08105	0.777983	1.23664	1.392	NA	1.00738	0.967467	NA	1.68544	0.915118
C9JF15	GLB1	1	0.9921	0.939357	NA	NA	0.881153	0.74486	NA	NA	NA	NA	NA	NA	1.12843	NA	NA	NA	0.98784	NA	NA	NA	NA	1.01815	NA	NA	NA	1.03979	NA	NA	NA	NA	NA	NA	NA	0.968337	0.826608
C9JF71	PIGX	8	1	0.879354	1.00984	0.932562	1.05161	0.80724	0.894777	1.04837	1.10765	1.12872	1.09288	1.02793	1.04852	1.18078	1.11661	0.966912	1.02139	1.00435	1.0929	1.31324	1.41556	1.17551	1.22649	1.37512	1.21475	1.37934	0.954106	1.22878	1.36951	1.16664	1.06525	1.63493	1.42649	1.42092	1.51926
C9JF79	MDH1	11	1	1.20345	0.663163	1.34046	0.966378	1.01626	1.17156	1.42207	1.28968	1.12458	0.844268	0.906166	1.07826	1.31741	0.880872	1.01704	1.17715	0.801756	1.19207	0.868523	0.796332	0.927747	1.05146	0.935845	1.05799	0.882811	0.975528	0.950735	0.833212	0.539279	0.816717	0.596326	0.591079	0.662883	0.610988
C9JFZ1	SYNJ1	618	1	1.61449	1.05737	1.00686	1.15314	0.886568	0.843206	0.840798	0.977355	1.04328	0.926369	0.997014	0.996932	1.14291	1.01403	0.961643	0.953955	1.03572	0.864713	0.958603	0.858709	0.904459	0.840914	0.863305	0.872055	0.794908	0.881478	0.951986	0.824175	0.868325	0.941268	0.978254	0.910408	0.95195	0.925051
C9JHL4	NELFA	19	1	0.854827	0.970948	0.999067	0.940395	0.992	1.1461	1.00325	1.02084	0.846611	0.983224	0.978351	0.593472	0.889734	1.00704	1.09836	0.996195	1.03199	1.42742	1.19108	1.5258	1.34226	1.32471	1.24192	1.02999	1.12436	1.20991	0.967612	1.13642	1.2924	1.17442	1.02425	1.26574	1.17826	1.0122
C9JI87	VDAC1	6	0.9999	0.552007	0.431644	0.844744	0.536515	0.756562	0.626085	1.05808	1.02985	0.674634	0.633261	0.521734	0.505439	0.503607	0.858329	1.10232	0.602495	0.963467	0.479739	0.443386	0.851576	0.497553	0.634122	0.608355	0.550158	0.53321	1.15863	0.447147	1.0248	0.320242	1.14369	0.3373	0.404278	0.349886	0.237416
C9JIS1	GNB2	2	0.9999	NA	NA	NA	NA	NA	NA	0.80704	0.840478	NA	NA	NA	NA	NA	0.807681	0.708178	NA	1.00442	NA	NA	NA	NA	NA	NA	NA	NA	0.880679	NA	0.760479	NA	0.871162	NA	NA	NA	NA
C9JJQ8	TUBA4A	8	1	0.66878	1.36899	0.658245	0.867249	0.766929	1.59839	0.772776	0.674936	0.822084	0.707176	0.768266	1.12383	1.15077	1.15719	0.80135	1.05911	1.28222	2.2919	2.52859	1.52405	0.967533	0.619344	0.992987	0.921609	0.982109	1.57	1.38768	0.564098	0.848406	1.18716	2.30278	0.797004	1.86811	1.35773
C9JKG1	BGN	11	0.9999	0.645047	1.11451	0.617992	0.892873	0.781256	0.771536	0.84214	2.09307	0.924383	1.11095	0.673553	0.936794	0.799337	1.01111	0.712593	1.13361	0.951171	0.878111	0.855853	1.4319	2.42571	2.27244	1.59017	1.07685	1.7827	1.27741	1.26376	2.4922	2.30123	0.938855	1.05909	0.908493	1.03681	1.24791
C9JLW8	MCRIP1	49	1	0.622864	1.02451	1.00847	0.553542	0.714085	0.769644	1.01937	0.893266	1.03636	1.58957	1.09374	1.17377	1.04694	1.3007	1.05985	0.836903	0.979259	1.09107	1.0558	0.920671	0.95538	1.01102	0.699891	1.41535	0.889842	1.0152	1.17088	1.18677	0.869278	0.760913	0.955274	0.854405	0.713744	0.844175
C9JNG9	COL6A3	8	1	0.327254	1.01955	0.400404	0.655466	0.484368	1.09856	0.61551	2.42191	0.908503	1.31606	0.408836	0.749535	0.557459	1.02354	0.437648	1.17202	0.495562	0.610798	0.903574	1.34182	3.26963	4.50932	3.59186	1.45625	2.45459	1.10057	2.95481	6.9716	7.6097	1.0634	0.912729	1.73963	1.57598	1.74751
C9JQ60	KCNAB1	8	1	1.26267	0.498918	0.679126	1.07242	0.853923	0.743616	0.876787	1.16529	0.837971	0.671368	0.852235	0.935563	0.782079	1.27372	1.29463	1.00314	1.10339	0.839699	0.713756	0.474081	0.907778	0.650086	0.566674	0.552412	1.00217	1.05493	0.790273	1.06369	0.573371	1.40733	0.943632	1.097	1.22099	0.982955
C9JQE1	IMMP2L	4	0.9996	0.978442	0.771871	1.05547	1.18503	1.04918	1.08236	NA	NA	1.06577	1.09535	1.18394	1.15753	0.668398	NA	NA	0.986843	NA	1.24166	1.14384	1.04604	1.31758	1.32077	1.2379	1.05616	1.52801	NA	0.547226	NA	1.27602	NA	1.18594	1.60861	1.32591	1.48911
C9JR56	SATB2	23	1	1.24603	1.25793	1.10603	0.756413	1.0875	1.27513	1.1001	0.929321	1.15621	1.03023	1.29126	1.71117	1.14103	1.12445	1.30981	1.12175	0.782005	1.01487	0.663429	1.0118	1.08613	1.11859	0.914678	1.20483	0.899207	0.630093	1.0559	1.15385	0.791451	0.945297	1.08411	0.81206	1.21186	1.03604
C9JRL4	MDH1	1	1	NA	1.62414	NA	NA	NA	0.947375	NA	NA	NA	NA	NA	NA	2.05625	NA	NA	NA	NA	NA	0.354892	0.643697	NA	NA	NA	1.65225	NA	NA	0.987759	NA	NA	NA	0.682097	NA	NA	NA
C9JRL6	EML2	5	1	0.746242	1.05661	1.03502	0.828431	0.888059	1.34308	NA	NA	0.93094	0.943801	1.01368	0.970455	1.20435	NA	NA	0.752951	NA	1.24598	1.52108	1.59791	1.06592	1.005	1.11788	1.24694	0.876641	NA	1.38066	NA	1.01532	NA	1.49875	1.03693	0.753715	0.731165
C9JRZ6	CHCHD3	101	1	1.3027	1.13877	1.22894	1.00278	1.11813	1.12963	1.06646	1.1564	1.1123	0.98243	0.940056	0.929231	1.10605	0.924247	1.05118	1.09266	0.817342	0.861316	0.768718	0.684414	0.619103	0.68252	0.575557	0.800959	0.80375	0.714322	0.858844	0.554488	0.721325	0.705656	0.909912	0.729576	0.709909	0.631292
C9JSQ1	CKMT1B	3	0.9918	0.354747	0.839016	NA	1.05464	1.41491	1.67671	1.31767	1.16603	NA	NA	NA	1.00554	1.05505	0.77404	1.03749	1.33502	0.421824	NA	0.924065	1.11747	2.0382	NA	NA	1.14978	1.58934	0.462309	0.83469	0.599675	NA	2.90396	1.30701	NA	7.25726	3.55047
C9JSU7	STRADB	1	0.9977	NA	0.72486	NA	NA	NA	1.05826	NA	NA	NA	NA	NA	NA	1.01296	NA	NA	NA	NA	NA	1.23887	1.42828	NA	NA	NA	1.1584	NA	NA	1.20612	NA	NA	NA	1.50932	NA	NA	NA
C9JTQ0	ANKRD63	27	1	0.857785	1.00426	0.823979	0.890896	0.950137	0.881566	0.913649	0.824898	0.960907	1.03431	0.999241	1.09957	0.996178	0.957659	1.03223	1.21281	1.07241	0.849492	1.68908	1.07052	1.26255	1.05458	1.37119	1.0485	1.31326	1.04606	0.897944	0.977288	1.14121	1.10011	0.780324	1.21789	1.41321	1.23207
C9JU30	ST7	2	0.9999	0.770387	NA	0.872417	0.904192	1.00149	NA	NA	NA	0.976196	1.09584	1.32755	0.899714	NA	NA	NA	0.695071	NA	1.26104	NA	NA	1.1067	1.47516	1.62931	NA	1.00902	NA	NA	NA	1.43936	NA	NA	1.3348	1.08983	1.03925
C9JVE2	DCUN1D1	6	0.9988	1.0299	1.20366	1.10207	0.880123	0.797097	0.891175	1.12562	1.20642	1.07261	1.13458	1.03315	1.00846	1.43766	1.18241	1.1499	0.986549	1.01428	1.05097	0.758476	0.866094	0.891245	1.18445	0.87562	1.20022	1.16683	1.07973	1.04356	1.0381	0.712071	0.714911	0.676213	0.622915	0.822592	0.792519
C9JWC3	SORBS2	240	1	0.988989	1.06643	0.851512	0.875884	0.961381	0.989116	0.886697	1.13086	1.01438	1.0785	1.08795	1.12849	1.0323	1.12592	1.03887	0.841633	0.945975	0.885054	0.961917	1.07155	1.19097	1.11235	1.13026	1.03054	0.963307	0.836005	1.1398	1.0555	1.46984	1.07425	1.01572	1.29875	1.30251	1.28598
C9JWG0	UGP2	5	0.9984	0.997666	0.884678	1.05132	0.845337	1.13526	1.21037	0.729328	0.871146	1.01473	1.30369	0.994534	0.770032	0.906118	1.08705	0.556631	0.654776	0.929992	0.965606	1.85122	0.776682	1.12608	0.956034	0.856922	1.18096	0.941789	0.872347	1.19106	1.02846	1.17544	0.493776	1.05624	0.951311	0.677013	0.845926
C9JXF9	IGFBP1	7	1	0.613609	0.817029	0.913047	0.936658	0.961939	0.948069	1.19947	1.33236	0.873389	1.08883	1.03231	0.98261	0.938467	0.619788	0.69684	0.614946	1.18038	1.66744	1.29613	1.37977	1.10718	1.13699	1.62267	1.27591	0.999253	1.15175	0.964099	1.26942	1.15147	1.43947	1.20576	1.99669	1.24515	1.52529
C9JXM4	NDUFB2	7	0.9989	0.73769	0.771509	1.00108	0.855472	0.992452	1.08102	1.0369	1.03357	1.29054	1.17203	1.35979	1.08067	0.942379	1.10916	1.23307	0.83725	1.01251	1.47769	1.40305	1.10071	0.902347	0.932204	0.999122	1.11434	0.692296	0.990852	1.06019	0.863933	0.895674	0.908078	0.996766	1.00058	0.756486	1.08465
C9K029	AIFM3	63	1	1.09458	0.989854	1.01672	1.08389	0.920153	0.902494	1.03302	0.974473	0.988872	0.942581	1.07801	1.11299	0.971392	0.998867	1.05807	0.912352	0.980659	1.10185	0.982864	1.07133	1.13377	1.32189	1.19899	1.08706	1.11574	1.10654	1.14235	1.15618	0.95252	1.08166	1.16611	1.03872	1.2222	1.33854
C9K0J5	RAPH1	48	1	1.13219	0.966738	1.02565	0.985529	1.0369	0.886867	1.02028	1.01197	0.849262	0.939115	1.01351	1.08337	1.17386	0.946877	1.09347	0.806722	1.05943	0.828476	1.01773	1.08777	1.00727	0.987098	0.956868	1.02144	1.00092	0.978638	0.921686	1.07626	0.910094	1.13045	0.951501	0.742242	1.00275	1.13079
D3DWX8	FAM3A	6	0.9947	0.763257	0.811103	1.00192	0.639199	0.837377	0.869214	1.50408	1.14945	1.02952	1.26026	0.910362	0.924434	0.889862	0.876859	0.927586	0.923179	1.18496	1.39208	0.960701	1.57722	1.29526	1.44179	1.54226	1.37417	1.48907	1.51536	0.905893	1.58563	1.31841	1.26237	1.01546	1.23546	1.26592	1.08328
D3DX16	SLC25A1	2	0.9998	0.654814	NA	NA	0.968829	1.27958	NA	NA	NA	NA	NA	NA	0.68657	NA	NA	NA	0.780656	NA	NA	NA	NA	1.16123	NA	NA	NA	1.24996	NA	NA	NA	NA	NA	NA	NA	1.04528	0.933666
D3DX19	CLDN5	4	1	NA	0.98528	0.784056	NA	NA	0.666373	1.20082	1.15729	0.51225	1.00349	0.970506	NA	1.01701	0.984848	1.63445	NA	0.932486	1.013	1.71364	1.29704	NA	1.60091	1.26161	1.03124	NA	1.14022	1.44351	1.08348	1.60485	1.22398	1.20666	NA	NA	NA
D3YTI2	ACP1	21	1	1.04265	0.870728	0.936706	0.838617	0.853964	0.908466	1.11235	1.35118	1.12848	1.18475	1.021	0.990197	2.02318	1.20198	0.857875	0.609093	1.08723	1.07803	0.860349	0.836658	0.849966	1.21564	0.972429	0.585721	0.713299	0.924074	1.14011	0.793919	1.24702	0.97838	0.282573	0.76941	0.518239	0.734327
D6R930	CPE	14	1	0.464983	0.813494	0.601371	0.823255	0.828882	0.71062	0.742903	0.763561	0.85131	0.98619	1.09099	0.673913	1.17475	0.801359	0.687835	0.703818	1.30729	1.31703	1.38712	1.85309	1.26783	1.47468	1.41207	1.28484	1.31312	1.01911	1.17753	1.39378	1.20216	1.08879	1.41347	1.32487	1.25085	1.23497
D6R9B6	RPS3A	15	1	0.756821	1.00898	0.901144	0.976277	0.930131	0.959971	1.02349	1.01364	1.54938	1.3376	1.16649	1.18924	1.22186	1.12083	1.09251	0.826096	1.38731	0.898936	0.922808	1.08568	0.839462	1.03938	1.073	0.969949	1.01767	1.09751	1.03106	1.10275	0.649711	0.795033	0.61519	0.693682	0.539445	0.556029
D6R9P3	HNRNPAB	100	1	1.14282	1.18049	1.23469	0.814689	0.825156	0.88337	1.03556	1.08054	1.10529	1.18198	0.927972	0.952087	1.17718	1.34407	0.96185	1.28547	1.03144	1.11616	0.591326	0.805624	0.781383	0.923322	0.728857	0.94419	0.983139	1.03416	0.972159	0.895936	0.906121	0.846143	0.777261	0.789391	0.754905	0.766821
D6RA42	MCTP1	2	0.9981	0.798458	0.747494	NA	0.911758	1.24167	1.15215	NA	NA	NA	NA	NA	0.8015	1.03129	NA	NA	0.855393	NA	NA	0.942912	1.35871	1.05626	NA	NA	1.10058	0.944986	NA	0.968791	NA	NA	NA	1.36602	NA	0.881237	0.991761
D6RAD4	CDK7	9	1	0.877972	1.00587	0.780067	0.785838	0.879994	0.614763	1.00199	1.1166	0.696073	0.891221	1.05513	0.81335	1.11326	0.754504	1.29241	1.08345	0.98912	0.989935	1.39178	1.32026	1.09001	0.725315	0.925227	1.19442	0.820206	1.39373	1.50758	1.1851	1.19579	1.13828	1.44706	1.24901	1.20632	1.38183
D6RAX3	PCDH1	25	1	1.2651	1.34487	1.06366	1.00328	0.929439	0.916095	0.946128	1.0916	0.941033	0.876799	0.894736	1.4896	1.59554	1.07598	1.02209	1.04124	1.09491	0.766654	0.711611	0.530429	0.894044	0.943548	0.876361	0.86045	0.686062	0.823307	0.720634	1.08837	0.966576	0.670454	0.483291	0.630313	1.24483	0.725787
D6RB81	AMACR	42	1	0.972115	0.728952	0.975579	0.959908	1.06238	1.1442	1.15743	1.14671	1.0691	1.05965	1.08712	1.04288	0.860108	1.37691	1.02272	1.25282	1.30373	1.17943	1.38492	1.12296	1.11639	1.3005	1.1874	1.04846	1.2333	1.08457	1.01007	1.10766	1.31032	1.15387	1.08541	1.51303	1.19448	1.12345
D6RBE3	ATPSCKMT	7	0.9999	NA	0.924522	0.952829	NA	NA	0.993402	1.09358	1.00943	0.932766	1.03138	1.10278	NA	1.08143	0.975313	1.20935	NA	0.902555	0.905116	0.975499	1.31894	NA	1.15713	1.26408	1.08245	NA	0.953124	0.982553	1.06059	1.14351	1.15621	1.24491	1.15672	NA	NA
D6RBQ9	HNRNPD	8	0.9984	1.45399	1.5657	1.09787	0.73745	0.813968	0.886278	1.19149	1.25618	0.932036	1.02502	0.944527	1.12225	1.0136	1.20732	1.41101	1.15396	1.02323	0.825567	0.50013	0.615532	0.533516	0.647545	0.650355	0.909228	0.751562	0.868908	0.988635	0.545386	0.672703	0.43717	0.302838	0.6524	0.436854	0.438035
D6RDK6	OCIAD1	3	0.9996	NA	0.916555	NA	NA	NA	1.0636	1.01046	1.29712	NA	NA	NA	NA	1.22703	0.977566	0.900074	NA	1.10113	NA	0.885838	1.1818	NA	NA	NA	1.22444	NA	0.96471	0.905757	0.929385	NA	0.938809	1.21305	NA	NA	NA
D6REB4	PAIP1	6	0.9981	0.858907	1.04477	0.989568	0.731648	0.902673	0.904123	1.00293	0.788098	0.75286	0.838252	0.94775	0.858485	1.0868	1.18341	0.997772	1.25306	0.834072	0.829496	0.990451	1.22554	0.967289	0.964697	1.10243	1.00064	0.957981	1.02005	0.950342	1.10352	0.880217	0.927863	1.03255	1.00101	1.02306	1.10035
D6REL0	CDC42SE2	16	1	0.849439	0.933225	0.923184	0.896879	0.898198	1.0028	0.869701	0.940184	1.43443	1.59911	1.27061	1.05231	1.0116	1.3063	1.05386	0.874954	0.806927	1.18203	0.879265	0.615762	0.868045	0.890554	0.841569	0.825534	0.832699	0.78163	0.75607	0.814194	1.18869	0.919548	0.896362	0.987691	1.11331	1.42055
D6REZ0	RAP1GDS1	8	1	1.28087	1.00105	1.07544	1.04523	1.07231	0.982632	0.987209	0.972558	0.795282	0.75575	0.897924	0.957598	1.21523	1.21384	0.931989	1.15394	1.0138	0.962714	1.09856	0.794721	1.10421	1.01964	0.958868	0.945896	1.06896	1.19103	1.13926	0.970037	1.05759	0.961853	1.10202	0.884763	1.01292	0.997301
D6RF23	RACK1	70	1	0.968264	1.1078	1.01521	1.05942	0.943969	0.91007	0.796981	0.85591	1.36842	1.01767	1.04425	1.2074	1.37706	1.26287	0.984996	1.00993	1.48731	0.65672	0.716997	0.547782	0.680838	0.708417	0.729493	0.724049	0.744305	1.03462	1.06807	0.745697	0.414213	0.557131	0.336616	0.512067	0.457958	0.457562
D6RF44	HNRNPD	7	1	0.898557	1.00716	1.06532	0.781719	1.06732	0.919326	1.19445	1.00458	0.991511	1.09807	1.06916	1.13014	0.787728	0.709298	1.00731	0.720706	1.13073	1.09579	1.41854	1.08009	0.831356	0.80444	1.04287	0.962686	1.0018	1.08661	0.744753	0.725552	1.06874	0.885547	0.606277	0.648617	0.861993	1.1508
D6RFI7	HAPLN1	8	1	1.00844	0.908904	0.989556	1.10468	1.08391	0.999777	1.06794	1.03209	0.984264	1.02565	0.944528	1.13749	1.23754	1.00703	1.08055	1.15141	0.936447	0.894597	1.03194	1.00044	1.30108	1.07958	0.996739	0.950112	0.973417	1.1793	1.14222	1.28342	1.08092	1.45191	0.912184	0.81515	0.788034	0.968579
D6RG18	CCNH	5	0.9931	0.990487	NA	1.03585	0.915125	0.961658	NA	0.978475	1.04445	1.15247	1.0394	1.19164	0.852752	NA	0.97265	1.0727	1.06239	1.2175	1.22034	NA	NA	1.01446	1.36289	1.2163	NA	0.89289	1.01722	NA	1.00842	1.10883	1.14709	NA	1.84973	1.1225	1.06928
D6RG21	MEF2C	22	1	0.659647	0.916858	0.843655	0.884168	0.959397	1.17821	1.1008	0.96903	1.21871	1.12283	1.1459	1.23179	0.811082	0.891254	1.21794	0.834732	1.0742	1.01173	1.22188	1.27661	0.986787	0.94265	0.979371	1.20292	1.15152	0.946477	1.18021	1.09374	1.0111	1.34359	1.08336	1.33579	1.45738	0.995276
D6RGV5	COX7A2	36	1	0.654318	0.828487	0.717151	0.866993	0.758554	0.955038	0.891839	1.21039	1.39213	1.21621	1.08512	1.2348	1.00248	0.989707	1.10157	0.808063	1.15692	1.2024	1.22505	1.56716	1.0582	1.00274	1.1263	1.32353	0.899432	0.81248	1.13336	1.12294	1.07006	0.870893	1.35574	1.12945	0.973504	1.03143
D6RHH4	RACK1	157	1	1.00159	1.16412	1.0334	1.0638	0.923627	0.946055	0.857009	0.962095	1.35969	1.03968	0.971822	1.18578	1.32793	1.23465	0.977447	1.00024	1.24015	0.713279	0.893025	0.616771	0.686229	0.742739	0.746116	0.816346	0.742697	1.015	1.0325	0.777126	0.643878	0.759449	0.616367	0.646271	0.623322	0.719476
D6RHV3	CKMT2	8	0.9974	0.72266	0.573241	0.821848	0.992611	0.962433	1.05668	0.612225	1.20015	1.16996	1.37583	1.1011	0.789312	0.922744	1.1322	0.670418	1.00701	0.754408	1.07301	0.821731	1.15139	1.04354	0.981834	1.09934	1.25005	1.0324	0.635529	0.736633	1.02058	0.8936	0.660729	0.739634	0.957652	0.783897	0.675682
D6RIH7		5	0.9994	NA	0.912203	0.899674	NA	NA	1.03101	1.28248	1.06994	1.22986	1.09206	0.956556	NA	1.20184	0.940162	0.987755	NA	1.34557	1.06728	0.913818	1.77881	NA	1.40651	1.31476	1.27019	NA	1.21044	1.22966	1.56306	1.11894	1.35524	1.34377	1.24813	NA	NA
D7RIG5	HLA-DRB1	20	1	1.20451	0.578948	0.391888	1.25913	0.554415	0.60623	1.21175	0.84294	0.709257	1.33207	0.588664	0.749399	1.40324	0.835833	0.691546	0.586201	1.32181	0.732847	1.79724	1.00655	1.8048	0.574072	1.74564	0.850165	1.83859	1.586	0.754268	2.14386	1.13455	1.38589	0.875071	1.41347	0.775274	1.54614
E5RFE7	CA1	216	1	0.94439	1.1051	0.685159	1.69922	2.39037	1.72525	0.918361	1.07595	0.650685	0.582182	0.885051	1.00437	0.48348	0.689854	1.12065	1.20975	0.568639	0.843304	1.43795	0.596747	0.671979	0.812428	0.72807	0.57826	0.480083	0.568882	0.91126	0.85223	2.26095	0.419426	0.403244	0.445249	0.381278	0.595813
E5RFP6	VDAC3	18	1	1.48699	1.21591	1.13284	1.16083	1.21437	1.07326	1.11048	1.30868	1.56229	0.698188	0.694769	0.99354	1.02665	0.629382	0.784233	1.00384	0.789883	0.600957	0.324252	0.821407	0.639544	0.513103	0.466082	0.696195	0.65308	0.540678	0.426953	0.604652	0.368188	0.521371	0.5547	0.328512	0.714966	0.427143
E5RG19	TMEM30A	14	1	0.792777	0.857415	1.07116	1.0412	1.16805	0.948666	0.973074	0.841627	0.99576	1.0555	0.913623	0.930926	1.14498	0.819051	0.895745	0.923103	0.893939	0.875898	1.27232	1.14568	1.40415	1.23678	1.14054	1.10114	0.950878	1.11598	0.978077	1.10832	1.09311	1.0623	1.06009	0.78369	1.13003	0.998693
E5RG95	ENO3	4	0.9993	1.30575	1.39629	1.42801	1.09209	0.849372	1.25529	NA	NA	1.10691	1.23191	1.03658	1.21339	1.07153	NA	NA	1.05896	NA	0.675834	1.16869	0.794564	0.952414	1.55334	1.48249	1.25455	0.843148	NA	1.18871	NA	1.34558	NA	1.16244	0.741961	0.772346	1.26165
E5RGD0	CIBAR1	3	0.9977	0.953081	NA	NA	0.928182	0.801056	NA	1.24757	1.11089	NA	NA	NA	0.96205	NA	0.990383	1.22333	0.791113	1.06125	NA	NA	NA	1.3503	NA	NA	NA	1.10863	1.02826	NA	1.24531	NA	0.852342	NA	NA	1.55617	1.12816
E5RGY9	SNAP91	8	1	1.78679	1.13259	1.15659	1.25084	0.952696	1.02347	0.877582	1.27436	0.733506	0.808461	0.754634	0.720772	1.43142	0.894218	1.19937	0.987601	1.08319	0.595696	0.730985	0.89263	0.758066	0.86612	0.753925	0.697799	0.970629	1.03156	0.876395	0.864475	0.680175	0.89452	0.756965	0.778023	0.596372	0.603506
E5RH45	PMP2	5	0.9998	NA	0.541406	0.589747	NA	NA	0.757276	0.66346	1.50294	1.26723	0.528551	0.433655	NA	0.632243	0.664456	0.352481	NA	1.13558	4.07212	1.07597	1.63341	NA	0.926176	1.36556	0.968939	NA	0.828344	1.00598	0.514715	0.813349	0.903556	0.504519	0.843839	NA	NA
E5RH73	NSG2	8	0.9935	1.32956	1.14118	1.029	0.721767	0.945714	0.963622	1.07318	1.02019	1.55542	1.23132	1.42581	1.66919	1.37062	1.04342	0.842384	0.776212	1.07717	0.952361	1.202	0.877847	0.553847	0.843488	0.879868	1.10529	0.550739	0.936365	0.986525	1.0897	0.917613	1.02916	1.24131	1.11155	0.662138	0.74297
E5RHG9	UQCRB	5	1	0.839288	1.26512	1.2692	0.986703	1.16823	0.909349	1.0675	0.882563	0.942508	0.869467	0.887931	0.814103	1.4509	0.914712	0.918862	0.99629	0.840326	1.15135	0.864789	1.40979	1.17857	1.09083	1.16214	1.46803	1.43724	1.13995	0.925813	1.09269	0.82262	1.47032	0.643676	0.581851	1.21778	1.19949
E5RHK8	DNM3	7	0.9999	1.70934	0.86114	0.995039	0.914305	1.01929	0.956545	0.665253	0.856446	0.861662	0.780748	0.849538	0.720586	0.901501	1.13062	1.04067	1.03527	0.818841	1.22287	0.918787	0.818238	0.830077	0.741956	0.695338	0.750044	0.730774	0.834844	0.969587	0.688438	0.941316	1.36548	2.18576	1.88114	1.39604	1.60274
E5RI56		254	1	1.18909	1.41515	1.18323	0.873454	0.700411	0.741354	1.04336	1.29093	0.91354	0.991444	0.850312	1.49348	1.14754	0.942299	1.00545	0.845236	1.10406	0.797695	0.632469	0.613803	0.77595	0.857368	0.634159	1.10634	0.952792	1.05235	0.990286	1.00928	0.423261	0.414474	0.460562	0.426003	0.396424	0.394959
E5RI87	RNF130	13	0.998	0.678737	1.00729	0.885927	0.93934	0.959028	0.965158	0.98504	0.903374	1.11885	0.948397	1.13052	1.08458	0.890318	0.962277	0.915653	0.81187	1.15566	1.06399	1.51763	1.14352	0.917078	1.16183	1.27157	1.05375	0.928875	1.0804	1.03321	0.996727	1.28285	1.17428	1.17954	1.39184	1.51425	1.02793
E5RI99	RPL30	4	0.9984	0.65322	0.836477	0.848178	0.87934	0.849986	1.09935	0.917011	0.823031	1.13601	0.991625	1.12644	1.1185	0.869385	0.824848	0.96225	0.753766	1.05252	1.45027	1.09192	1.15032	1.08786	1.32878	1.42244	1.08729	1.03818	1.1828	0.802254	1.10651	1.46128	1.36629	1.27019	1.89503	1.53665	1.24936
E5RIF9	CA1	94	1	0.884614	1.12102	0.711476	1.60846	2.43297	1.61942	0.890563	1.0124	0.591157	0.522904	0.863617	0.938793	0.509553	0.680852	1.16279	1.05258	0.477252	0.777246	1.20253	0.491372	0.489891	0.725371	0.637899	0.530765	0.416296	0.573482	0.83749	0.660847	1.84648	0.397991	0.451165	0.410518	0.38853	0.462315
E5RIG2	CSMD1	13	1	1.00702	0.834255	1.16789	0.93331	1.04037	1.1192	NA	NA	0.939295	0.873126	1.12006	0.89211	0.894969	NA	NA	1.03649	NA	0.999503	1.1626	1.43632	0.951642	1.06443	0.996992	1.09518	0.851706	NA	1.1086	NA	1.17202	NA	1.30822	1.65739	1.18855	1.18684
E5RIP7	IMPA1	2	0.994	NA	1.35807	NA	NA	NA	1.0086	1.16167	1.31536	NA	NA	NA	NA	1.6746	1.19054	1.12125	NA	1.33925	NA	2.67339	1.69515	NA	NA	NA	2.03581	NA	0.954016	2.1899	1.3451	NA	1.00775	1.44815	NA	NA	NA
E5RJ39	RALYL	3	0.9989	0.810851	NA	1.10406	0.872808	0.693475	NA	0.953916	0.887766	1.27987	1.17987	1.04107	1.20515	NA	1.0771	0.890144	0.986511	1.01034	1.04398	NA	NA	1.02147	0.979369	0.946161	NA	0.943455	0.949124	NA	1.02873	1.03579	1.25096	NA	1.38955	0.805	1.09446
E5RJ60	FAM131B	16	1	0.967386	1.11379	0.976743	0.889929	0.936967	1.14253	0.884909	0.986125	1.25935	1.09093	1.0123	1.1353	0.967597	1.30781	1.05508	1.2071	0.973835	1.22573	0.979811	1.0206	0.747304	0.968271	0.947412	0.909546	0.824202	0.884383	1.02508	0.914197	0.83967	0.872449	0.645377	0.929262	0.63045	0.793196
E5RJM6	ANKRD65	8	0.9976	0.855563	0.853643	0.8619	1.12424	1.04842	0.652756	1.12667	1.0202	0.82873	1.1817	0.887375	0.993721	1.2531	1.26277	0.929366	1.00979	1.04661	1.17916	1.19274	0.910551	1.3068	1.04639	0.992672	1.6442	1.31898	1.36091	1.67426	1.09879	1.2758	1.10661	2.15504	1.38115	1.23512	1.13728
E5RK27	VDAC3	12	1	1.54407	0.95882	0.902529	1.25694	1.27816	1.37995	0.96758	1.27901	1.09287	0.731192	0.583098	1.01964	0.954366	0.815588	0.789141	1.37505	0.764274	0.668856	0.73183	0.893857	0.834953	0.550025	0.679406	0.8051	0.95423	0.686893	0.597994	0.561339	0.37782	0.517079	0.596697	0.551063	0.566109	0.813717
E7EMY4	L1CAM	12	1	1.24844	1.02927	1.06825	1.17692	1.25339	1.08956	0.861454	0.951787	0.848001	1.00704	1.10482	1.24069	1.08878	0.988771	0.785726	1.06205	0.96141	0.927683	1.21897	1.1085	1.08992	0.94156	1.05678	1.04239	1.05478	0.845539	1.16685	0.985748	1.23367	0.860077	0.954015	1.05918	0.850049	0.929739
E7EPP6	CHEK1	7	0.9962	0.765046	1.3304	0.850094	1.04859	0.805944	1.37686	0.910097	0.989864	0.850063	1.12165	1.08396	0.996866	0.96615	0.941391	1.17357	0.889284	1.02443	0.99285	0.950548	0.637081	0.825533	0.94544	0.995237	0.824799	0.671293	0.91743	0.975071	0.919175	1.01358	1.23326	1.91252	0.983897	1.03402	1.10636
E7EQB3	TSEN34	24	0.9999	0.752502	0.741661	0.905792	0.81805	0.787453	0.947047	0.768885	0.82376	0.829697	1.11761	1.02404	0.959807	0.898114	0.973736	0.939754	0.924007	0.925316	1.14535	1.28418	1.09226	1.03781	1.15896	1.11398	1.03915	0.992602	1.16565	1.10436	1.11361	1.35953	0.996724	1.18035	1.2659	1.13262	1.06062
E7EQH8	ELN	2	1	0.874879	NA	NA	0.612383	0.785691	NA	NA	NA	NA	NA	NA	0.717219	NA	NA	NA	0.815444	NA	NA	NA	NA	0.945868	NA	NA	NA	0.930061	NA	NA	NA	NA	NA	NA	NA	0.661576	1.434
E7EQL5	DYNC1I2	191	1	1.09369	1.03115	1.08347	0.946418	1.17864	0.979781	1.02133	1.11751	0.939478	0.876777	1.03633	1.07764	0.913571	0.923577	1.12414	1.06559	0.920871	0.925439	0.888802	0.920516	0.964873	0.922986	0.87359	0.945733	0.963252	1.01428	0.929711	0.989139	0.923833	1.02205	1.04223	1.07686	1.02742	1.09212
E7EQT4	ACIN1	8	0.9987	0.818104	0.966923	1.19541	0.879101	0.864459	0.962977	1.12743	0.935373	1.01981	1.17294	1.10569	1.23214	1.01491	0.931642	1.10812	0.98915	1.06491	1.1418	0.971968	1.13573	1.328	1.36894	1.10323	1.20819	1.16152	1.02267	1.10707	1.49772	0.989183	0.95596	0.772643	1.15805	0.964994	1.02854
E7ESD3	DYNC1I2	8	1	0.799348	1.1668	1.40421	0.749052	0.736454	1.41889	0.761249	0.633746	0.925818	0.9856	1.17958	0.93574	0.886819	1.01869	1.10034	0.635086	0.764285	1.09029	0.948099	1.18514	1.01506	2.19705	1.45238	1.46134	1.1168	0.767516	1.36784	1.26476	4.25989	2.1237	2.10855	3.59349	1.42622	1.67067
E7ESK7	YWHAZ	8	1	0.854342	1.13138	0.917359	1.02525	1.01386	1.11899	0.938769	1.00406	0.814171	0.955753	0.987359	0.968648	1.04513	1.00863	1.01766	0.836611	0.976905	1.01952	1.32156	1.23112	1.17455	1.36745	1.21237	1.26032	1.0662	0.9625	1.14076	1.1646	1.2548	1.23568	1.25671	1.00112	1.31	1.04908
E7ETR1	CAMKV	8	1	0.969574	0.93711	1.1472	0.948197	1.05086	1.08262	1.0181	1.12794	1.16085	0.999044	0.897336	0.91188	0.909599	0.945287	1.04899	0.869706	0.864193	1.24778	1.38664	1.22004	0.915397	1.22943	1.25419	1.25484	0.739085	1.03549	1.0193	1.04974	1.03191	1.21407	1.41973	1.04597	1.15549	0.921779
E7EU96	CSNK2A1	285	1	1.24249	1.11805	1.01046	0.996541	0.945747	0.917846	1.03365	0.939666	1.02151	0.9816	0.988461	1.05229	1.24439	1.28291	1.09591	1.21118	1.04576	0.879566	0.762067	0.655665	0.708464	0.780181	0.714345	0.931466	0.826869	0.931016	0.930246	0.806877	0.767896	0.715267	0.663624	0.668409	0.703276	0.750577
E7EUF1	ENPP2	103	1	1.05787	1.01821	0.987943	1.12429	1.21422	1.03251	0.955078	0.816869	0.878347	0.874583	1.01142	0.963434	1.05432	1.0269	1.0639	1.10068	0.824377	0.984624	1.22047	0.764594	0.836058	0.93057	0.983493	0.672158	0.914961	0.991039	0.882562	0.821203	0.856272	0.777486	0.820008	0.826946	0.88707	0.862736
E7EUN2	AGAP1	48	1	0.719974	0.89235	0.86167	0.918683	0.826698	1.04257	0.972242	0.945217	1.18008	1.08835	1.17294	0.9273	1.0534	0.925705	0.942844	0.828985	1.27706	1.10426	1.28737	1.36499	1.2071	1.14265	1.18156	1.15627	1.17131	1.12988	1.17237	1.19873	1.31581	1.28207	1.86131	1.51861	1.91553	1.78217
E7EUU4	EIF4G1	359	1	1.35483	1.02899	1.12791	0.981445	0.974349	0.856115	1.00365	0.99212	0.882924	0.947738	0.928111	0.997343	1.15502	1.01217	0.926689	1.13671	1.01145	0.971199	0.874654	0.8466	0.948566	0.984282	0.919782	0.986995	0.975845	1.07748	0.96087	1.01953	0.887596	0.912172	1.02183	0.946503	0.857545	0.88648
E7EV07	ARHGEF4	20	1	0.851592	1.29367	0.670821	1.09124	1.16647	1.45902	1.14163	0.878683	0.715555	0.696457	0.864202	0.963039	0.737277	0.789632	1.0585	0.913348	1.13956	1.20633	1.55842	1.11115	1.17055	1.16333	1.31087	0.910063	1.08028	1.03613	1.08283	1.06923	1.32997	1.29349	1.22291	0.864378	1.0168	1.22131
E7EV59	ATP6V1C1	6	1	2.14436	0.966624	1.66421	1.28615	1.41099	1.12645	0.830453	1.32845	0.828578	0.645539	0.891963	0.871898	1.08376	0.838431	0.740039	1.30947	0.725723	0.80631	0.996045	1.05845	0.65293	0.739034	0.640796	1.05791	0.945015	0.838042	0.826091	0.642913	0.536126	0.599666	0.888253	0.597426	0.554348	0.426518
E7EVA0	MAP4	371	1	1.13139	1.10003	1.08255	0.975186	1.2167	1.10695	1.10539	0.941728	0.940563	0.971003	1.11596	0.955616	1.06793	0.929026	1.07623	1.01806	0.803402	0.78284	0.91766	1.00315	0.965301	1.00129	0.887361	1.01383	1.17601	0.919345	0.837149	1.04332	0.89932	0.89509	0.916961	0.828212	0.815337	0.853998
E7EVJ5	CYFIP2	475	1	2.53794	1.26404	1.13596	1.134	1.1262	1.00129	0.78946	0.881629	0.701139	0.718773	0.957065	0.902238	0.932765	0.932536	0.995068	1.0254	0.78616	0.638976	0.829599	0.771508	0.751784	0.694676	0.665602	0.771189	0.727555	0.805149	0.873483	0.71126	0.745979	1.13213	1.32872	1.0386	0.97725	0.943198
E7EVZ2	YWHAZ	1	0.9944	1.12644	NA	NA	1.28322	1.05636	NA	NA	NA	NA	NA	NA	1.36548	NA	NA	NA	0.927638	NA	NA	NA	NA	1.62517	NA	NA	NA	1.31367	NA	NA	NA	NA	NA	NA	NA	1.35745	1.42177
E7EW49	CLASP2	54	1	1.65044	1.2636	1.07845	1.20818	1.2128	0.909427	0.970793	1.02952	0.943589	0.850199	0.932498	1.04052	1.34028	1.00236	1.08164	1.00986	1.04687	0.740839	0.68094	0.629126	0.83632	0.66919	0.744873	0.849725	0.790961	1.11001	0.888379	0.601059	0.762923	0.743216	0.567559	0.758902	0.784375	0.815754
E7EWI0	MAGI2	1	0.9985	NA	1.2422	NA	NA	NA	1.07892	NA	NA	NA	NA	NA	NA	1.09801	NA	NA	NA	NA	NA	1.01431	1.16836	NA	NA	NA	1.16957	NA	NA	0.743545	NA	NA	NA	0.939058	NA	NA	NA
E7EWR4	CSTF2	78	1	0.966426	0.949033	1.07146	0.947308	0.967025	0.982312	1.08528	1.03257	0.904714	1.08446	0.970568	1.13122	0.897504	1.13818	1.05874	0.983686	1.02248	0.846289	0.884426	1.04852	1.06234	0.98196	0.934406	1.08326	1.05807	1.02033	1.02932	1.09064	0.948822	0.976892	0.951874	0.929834	0.984824	1.07786
E7EX90	DCTN1	278	1	1.59823	1.12359	1.05937	1.04522	1.0993	1.04731	0.840689	0.970209	0.886163	0.867806	0.908218	0.995819	0.930107	0.856281	0.96977	1.0196	0.901447	0.989421	0.98359	0.913504	0.9325	0.864893	0.781398	0.865126	0.94744	0.919449	0.997162	0.915443	0.915757	1.13915	1.22735	1.08104	1.04721	1.04526
E9PAV3	NACA	113	1	0.798585	0.983544	0.899285	0.927602	0.837342	0.900138	0.906935	0.882846	1.41476	1.34912	1.14441	1.11608	1.14418	1.11456	0.95097	0.869126	1.19325	0.856677	0.82278	1.14672	0.991968	1.05965	1.02154	1.08723	1.01407	0.899371	1.07013	1.09926	1.26487	0.802555	1.16096	1.41859	1.05308	1.10922
E9PBQ7	GABRA2	19	1	0.850839	0.871091	0.928928	0.950898	1.05009	1.14497	1.15748	1.08798	0.938863	0.912937	1.14237	0.975154	0.937672	1.04006	1.28888	0.799348	1.02654	1.07699	0.97435	1.31822	1.12958	1.41636	1.43747	1.14551	1.28943	1.02726	1.216	1.26172	1.36871	1.54486	1.21795	1.32066	1.45544	1.12447
E9PC69	MARK2	218	1	1.19294	0.992489	0.996143	0.990301	1.0581	0.918576	0.992778	0.940639	0.967639	1.0594	1.02032	0.992058	1.02121	1.02465	1.06231	0.954125	1.01692	1.00118	0.960066	1.04762	0.947276	0.994669	0.997896	0.999433	0.913789	0.96117	0.929847	0.862438	1.0713	1.01105	1.0926	1.21205	1.1248	1.02686
E9PCR7	OGDH	3	0.9943	1.50143	NA	1.23517	1.02689	1.03836	NA	0.995104	1.00469	0.694855	0.757597	1.06587	0.85103	NA	1.23885	1.21243	1.23915	0.713995	1.52402	NA	NA	0.930736	0.809136	0.812588	NA	0.986898	1.05033	NA	0.726251	0.653302	1.17097	NA	1.06309	1.15306	1.10939
E9PCV4	SPHK2	3	0.9977	0.783802	NA	1.3097	0.839669	0.905901	NA	0.678624	0.678759	1.03355	1.48731	1.50945	1.26059	NA	0.90194	0.578559	0.990846	0.702544	1.69055	NA	NA	1.16256	1.66338	1.37534	NA	0.956807	0.761757	NA	0.483438	1.30691	1.05888	NA	1.76339	0.53825	1.06098
E9PCX7	NNT	8	1	1.14992	0.85578	0.949948	1.04066	0.946457	0.837764	1.02594	1.23613	0.753217	0.84463	0.927774	0.894733	0.842998	0.953559	0.848826	0.94336	0.852053	1.29761	0.929795	2.35762	1.14998	1.24409	1.31886	1.26873	0.929341	0.913442	0.83034	1.18179	0.829778	0.844407	0.696141	0.701003	0.70946	0.733497
E9PCY0	DCTN1	5	0.9997	0.613737	0.40371	0.615197	0.779363	0.524905	0.570922	1.10478	1.48689	0.357274	0.818258	0.636885	0.699221	0.658635	1.44654	1.87156	0.777878	1.3665	1.41932	0.820845	0.843415	0.93864	0.835125	1.14673	0.939768	2.13846	1.78911	0.828916	1.70748	1.347	2.72547	1.31771	1.04085	0.793536	1.07444
E9PD99	LRCH3	4	1	0.763424	0.799901	0.812273	0.891042	0.615726	0.788241	NA	NA	1.29273	1.1934	1.33957	1.03756	0.718331	NA	NA	0.750771	NA	1.44557	1.39212	0.92424	1.14161	1.40959	1.71173	0.853083	1.13589	NA	1.17814	NA	1.73645	NA	1.36959	1.61406	1.62463	1.82373
E9PDL2	DPP6	16	1	1.16997	1.05479	1.11989	0.916893	0.975263	1.013	0.854857	0.832968	0.797608	0.940135	0.870707	0.98821	1.19258	0.888634	0.798235	1.11865	0.773027	0.50969	0.52043	0.741803	0.605486	0.663365	0.510735	0.670933	0.751501	0.764427	0.629187	0.538145	0.644294	0.747125	0.817228	0.600087	0.668027	0.586752
E9PDU6	CNN3	5	1	1.21174	0.881499	1.02232	1.06343	1.15556	0.789594	0.615669	1.25103	0.835118	1.01978	0.703176	0.995801	0.857554	0.668347	0.543758	0.981122	1.41696	0.768063	0.659348	0.962045	1.00487	1.18515	0.872752	1.17812	1.70328	1.41822	1.09962	1.38464	0.614889	0.582867	0.723448	0.702589	0.912508	0.682949
E9PEW8	HBD	8	0.9895	0.91446	0.916814	0.967265	0.933811	0.986636	1.02322	1.08759	1.10257	0.875258	0.925043	0.959618	0.989333	1.03451	0.919089	1.1579	0.827637	0.981977	1.14266	1.35217	1.11485	1.13903	1.21299	1.17029	1.05665	1.00964	1.07252	1.14213	1.31738	1.32985	1.12433	0.930964	1.00654	1.31848	1.11302
E9PEY4	DTNB	16	1	0.963218	1.30759	1.17103	1.04913	0.965546	1.03498	0.939246	0.904882	0.965448	1.01259	1.05107	0.841129	0.919522	0.838826	0.810279	0.89554	1.07216	1.11649	1.15278	1.27359	1.16399	1.15307	1.28874	0.932531	0.951266	1.04634	1.13072	1.11114	1.81515	1.27265	1.44594	1.39646	1.15187	1.33852
E9PEZ7	ABI2	8	1	1.02731	1.04677	1.27093	0.932509	0.884868	1.2378	0.958235	0.907013	1.18373	1.35511	1.23302	1.34824	1.1801	1.14811	1.20976	0.874161	0.769076	1.3629	1.07346	1.09589	0.910919	1.32268	1.03482	0.831573	0.802614	0.887884	0.848921	0.887427	1.12807	1.04246	0.957632	1.60429	1.22183	0.86363
E9PF82	CAMK2D	186	1	1.15275	1.15492	0.93175	1.01839	1.1045	0.9178	0.908476	0.932484	1.08273	1.01691	0.988934	1.1885	1.17973	0.859714	1.09519	0.942964	1.02795	0.672264	0.792898	1.08255	1.03072	0.988631	0.967614	1.0543	0.910239	0.916769	0.822334	0.926649	0.836818	0.956609	0.786851	0.749477	0.964116	0.903653
E9PFI2	STXBP5L	146	1	1.49047	0.941732	1.00134	1.12177	0.934033	0.968096	0.98437	1.02658	1.04054	0.997217	0.992721	0.980033	1.07763	0.953717	0.974469	0.982921	1.02511	1.03736	1.15285	1.15434	1.1157	1.05462	1.10249	1.0623	0.96901	1.01337	1.0944	0.99203	1.13448	1.12517	1.31167	1.20504	1.08352	1.04594
E9PFN4	SLC4A7	28	1	1.22421	0.944405	1.00905	0.973926	1.06907	1.01915	1.02187	0.987197	0.923933	0.984657	0.965216	1.01117	1.04272	0.857527	0.836483	0.859004	1.07765	0.990225	1.27621	1.35472	1.22534	0.957808	1.31814	1.03196	1.16226	1.09679	1.31998	1.21232	0.943904	1.01247	1.34614	1.12039	1.27885	1.10594
E9PGC8	MAP1A	1943	1	1.26006	1.43543	1.11799	1.01493	1.0297	0.970531	0.941486	0.988692	0.882711	0.797643	1.06754	1.21061	1.23191	0.914105	1.20314	0.906063	0.961752	0.67022	0.83673	0.692454	0.770032	0.824707	0.763348	0.81349	0.608144	0.830061	0.867749	0.731346	0.66597	0.783622	0.625361	0.636836	0.622559	0.640756
E9PGN7	SERPING1	115	1	0.705268	1.21813	0.950647	0.898021	1.01528	1.61248	1.18679	1.10207	1.4	1.10656	0.848663	0.890824	1.03658	0.765381	0.777088	1.10634	1.03015	1.06242	0.935665	0.943306	0.722649	1.11407	0.820396	0.97606	0.85357	1.0534	0.926775	1.07164	1.03917	0.997014	0.669403	0.838611	0.871028	0.726445
E9PGZ1	CALD1	9	1	0.993037	0.886402	1.02096	0.88982	0.930026	1.01098	0.690677	1.74189	1.26493	0.955452	1.10602	0.988052	0.811251	0.607082	0.768478	0.731893	0.99739	0.992494	1.10515	1.02476	0.860364	0.953368	1.04175	0.860435	1.3832	1.20691	1.00591	1.0049	0.854249	0.776083	0.853673	0.810922	0.675377	0.70092
E9PI76	ALKBH6	20	1	0.986506	0.939874	0.891265	0.906984	1.02645	0.947155	0.989176	0.910293	1.08087	1.16806	1.07356	1.19369	1.24882	1.27905	1.04322	1.09506	1.19523	1.18991	0.858707	0.814236	0.903554	1.05078	0.868529	1.05286	0.907552	1.17494	1.04351	1.09895	1.04354	1.106	0.913661	0.930681	0.907983	0.986599
E9PIA8	PPT1	31	1	0.778956	1.06434	0.996931	0.943485	0.983	0.982748	1.23197	0.875208	1.12763	1.25128	0.94791	1.15793	1.09725	0.877854	0.978765	1.05203	1.14002	1.11159	1.03907	1.17958	1.03308	1.22008	1.19636	1.1832	1.00364	0.964517	1.10115	1.28241	0.883336	0.787306	1.02128	1.01884	0.968667	0.824343
E9PIW2	DLG2	10	1	2.15244	1.23649	NA	1.05886	0.847228	0.793168	0.778801	0.600068	NA	NA	NA	1.36338	1.15923	1.11365	1.17363	1.3867	1.05761	NA	0.532556	0.730443	0.745513	NA	NA	0.423193	0.580967	0.786009	0.916825	0.797348	NA	1.13163	0.736673	NA	NA	0.667375
E9PJ72	MBP	3	0.9993	0.315041	NA	NA	0.680885	0.630445	NA	1.13859	0.932037	NA	NA	NA	0.78683	NA	1.35942	0.788725	0.750215	1.15247	NA	NA	NA	2.45718	NA	NA	NA	0.90994	2.38652	NA	2.06894	NA	1.10763	NA	NA	0.816681	0.753725
E9PJF6	AMPD2	1	0.9936	NA	NA	NA	NA	NA	NA	1.03231	1.03057	NA	NA	NA	NA	NA	0.950729	1.15282	NA	1.11797	NA	NA	NA	NA	NA	NA	NA	NA	1.13818	NA	0.927369	NA	0.809757	NA	NA	NA	NA
E9PJL9	NDUFV1	20	1	1.08713	1.06612	1.27085	1.19659	1.19264	0.919747	0.95257	1.00521	0.895002	0.756816	0.910786	0.862017	1.03778	0.889928	0.974567	1.03712	1.01182	0.8582	0.788776	1.02766	0.96566	0.933402	0.91245	1.03628	0.810666	0.910363	0.99417	0.87541	0.908397	0.844846	0.651152	0.660396	0.770381	0.63714
E9PJN9	RPS3	11	1	0.717319	0.727731	1.00973	0.807194	0.896294	0.962222	0.933006	0.902986	0.874172	1.02557	0.982151	0.842152	0.782307	0.907631	0.940577	0.783902	0.950064	1.01631	1.20749	2.02696	0.951305	1.26465	1.31664	1.46093	1.08593	1.04847	1.05347	0.921269	1.08615	1.02598	1.36271	0.895395	0.925424	0.816034
E9PK54	HSPA8	225	1	1.55592	1.06734	1.10063	1.12597	1.14107	1.12152	0.95833	0.89303	0.84849	0.775296	0.961384	0.87593	1.05687	0.971421	1.17815	1.03133	0.8369	0.867622	0.9394	0.671737	0.76908	0.741677	0.718256	0.721454	0.758079	0.902145	0.978053	0.7425	0.863949	0.888322	1.00952	0.73869	0.805877	0.878054
E9PKL1	CTNND1	15	0.9999	1.05034	1.02896	1.07467	0.835816	1.15303	0.945511	0.950125	1.15649	1.04852	1.09077	1.14295	0.878675	1.09854	1.11755	1.10129	1.03772	0.836996	1.1858	1.0394	0.832935	0.811788	1.24803	0.942085	1.04321	1.15096	0.998894	1.06962	0.963632	1.27608	0.677293	0.740389	1.2545	0.64234	0.614217
E9PKP7	UBTF	50	1	0.942458	1.00949	0.917688	1.00041	1.35436	1.14442	1.01529	0.866556	0.764835	0.913355	0.901841	0.878211	0.818192	0.889101	1.0825	0.888369	1.04944	1.01221	1.12307	1.10504	0.837947	0.786041	0.905582	0.956577	1.03466	1.173	1.16263	0.83736	0.994341	1.14968	1.1091	0.941439	1.19358	1.08386
E9PKU7	GANAB	3	0.9999	0.771183	1.43878	NA	0.555596	0.642593	0.932314	NA	NA	NA	NA	NA	0.687281	1.33817	NA	NA	1.19245	NA	NA	0.728958	0.323205	0.191061	NA	NA	0.748292	0.558845	NA	1.22552	NA	NA	NA	0.482179	NA	NA	0.389219
E9PL57	NEDD8-MDP1	107	1	0.840805	1.02609	0.927731	0.791058	0.951339	0.871483	1.01892	0.97143	1.14877	1.3885	1.13243	1.17895	1.01277	0.861484	1.06187	0.825615	1.09386	1.06114	0.993196	0.960011	1.08276	1.16979	1.20851	1.39867	1.08355	1.08842	1.07492	1.27965	1.13493	0.907033	0.787474	0.841313	0.821442	0.899878
E9PL71	EEF1D	24	1	1.12589	1.17372	1.15655	0.857035	1.05439	0.996903	1.15024	0.987168	0.830557	1.18331	0.914746	1.02856	1.12746	1.08444	1.06524	1.15532	0.89584	0.712323	0.826351	0.725825	0.771563	0.741881	0.473242	1.02711	0.835828	0.835893	0.842225	0.905094	0.649195	0.568882	0.667253	0.760397	0.678393	0.671073
E9PLP0	CARS1	1	1	NA	NA	NA	NA	NA	NA	1.0655	0.894291	NA	NA	NA	NA	NA	1.0901	1.04525	NA	0.81894	NA	NA	NA	NA	NA	NA	NA	NA	0.952999	NA	1.07328	NA	1.1894	NA	NA	NA	NA
E9PLY0	MACF1	3	0.9998	1.27172	1.10896	NA	1.08156	1.09186	1.30334	NA	NA	NA	NA	NA	1.14266	1.44137	NA	NA	1.14335	NA	NA	1.14982	1.49011	1.13383	NA	NA	1.26633	1.13137	NA	1.17622	NA	NA	NA	1.16358	NA	1.24545	1.07127
E9PLY4	PRCP	11	0.9981	0.638185	0.742618	0.673537	0.845628	0.908113	1.14161	0.862658	0.784856	0.630437	1.0835	1.1184	0.844998	0.761186	0.599522	0.824217	0.808294	0.861511	1.51467	1.57982	1.4547	1.27997	1.57399	1.45026	1.18548	1.26474	1.33202	1.32571	1.04539	1.38834	1.23367	1.40542	2.01665	1.0941	0.981412
E9PLY5	MACF1	16	1	0.988348	0.942737	0.926555	0.772913	1.14512	0.810338	0.872944	0.91955	0.87008	0.838753	1.03879	0.890003	0.964133	0.957975	0.909723	0.932981	0.931283	1.23625	0.924111	0.953304	0.914009	1.16499	0.828208	0.816144	1.09993	1.09895	1.05146	1.01163	1.26787	1.18652	0.944388	1.39861	0.885585	0.913894
E9PMD7	PPP1CA	36	1	1.73334	1.24113	1.15763	1.03452	0.967901	0.87775	0.929631	1.00293	0.969863	0.920181	0.962328	1.07708	1.35666	1.33016	1.09191	1.22985	1.11711	0.72358	0.673394	0.407776	0.516794	0.641665	0.489608	0.709783	0.466616	0.757968	0.839986	0.649807	0.452305	0.601538	0.530491	0.465088	0.488398	0.41126
E9PMV1	PLEC	2792	1	1.45671	0.877562	0.875618	1.09294	0.876719	0.874368	0.774953	1.0494	0.812523	0.760646	0.894224	0.996538	0.882264	0.854809	0.850409	0.965102	1.28771	1.08671	0.966929	0.875827	1.00034	1.0371	1.05572	0.863871	1.15549	1.55634	1.24888	1.001	1.11912	1.28626	1.47722	1.24264	1.24503	1.36489
E9PMV2	HLA-DQA1	9	0.9999	0.715641	0.689835	1.06719	1.12919	0.844998	0.850763	1.04799	0.833377	0.768665	0.948288	1.02869	1.21793	0.675665	1.0274	0.686682	0.962394	1.40763	0.988883	0.791671	0.873393	1.28221	1.26913	1.34155	0.82131	0.81736	1.42089	1.23922	1.1499	1.1209	1.16263	1.23155	0.815138	0.988651	1.00262
E9PN89	HSPA8	6	1	1.03595	NA	1.19516	1.14252	1.1776	NA	0.840781	0.8496	0.845862	0.715331	0.795925	0.894148	NA	0.761912	0.905529	1.11277	0.891802	0.947129	NA	NA	1.08605	0.990038	0.745553	NA	1.10298	0.9707	NA	1.01789	0.383014	0.64319	NA	0.329813	0.721769	0.77638
E9PNA8	SMIM7	3	1	0.988881	NA	NA	0.856425	0.856553	NA	1.03098	1.38051	NA	NA	NA	1.33624	NA	1.12659	0.922805	0.8507	1.15899	NA	NA	NA	1.30945	NA	NA	NA	1.12148	1.01636	NA	2.35885	NA	1.40791	NA	NA	1.44202	1.43718
E9PND2	CSRP1	8	1	0.969509	0.919257	0.866635	0.906872	1.61877	1.11919	0.992722	1.30933	0.707828	0.667282	0.905647	0.852743	1.12559	0.567599	0.97612	0.766359	1.02049	0.763852	0.988274	1.01513	1.08118	1.15863	1.26981	0.886169	1.06489	1.03846	1.22916	1.02526	2.41922	1.04616	0.925383	0.670871	0.491925	0.699937
E9PNH7	CRYAB	16	1	0.292307	0.699259	0.892029	0.702235	1.40441	1.36527	0.801116	0.779053	0.502702	0.580727	1.35695	1.20086	0.860721	0.177874	1.18928	0.236111	1.44273	1.61642	1.35226	0.891444	0.707802	0.568931	2.29247	0.657678	0.799753	1.60192	1.23338	0.92239	1.93281	1.38487	1.04176	0.971754	1.10253	1.52848
E9PP21	CSRP1	150	1	1.44572	1.01186	0.944081	1.17157	0.990155	0.985468	0.761814	1.15716	1.40551	1.14097	0.894806	0.965782	1.00984	1.13164	0.880243	1.13692	1.18897	0.806735	0.669148	0.579079	0.746849	0.657684	0.51108	0.809347	1.20037	0.918889	0.879815	0.748028	0.569425	0.602593	0.582039	0.604107	0.488535	0.520103
E9PPJ0	SF3B2	131	1	1.02624	1.11011	1.08245	0.950048	1.02446	1.12726	1.00622	0.983884	1.06582	0.982428	1.04546	1.01909	0.917362	0.915253	0.973718	1.02382	0.91779	1.04543	0.945155	0.93683	0.935083	0.984863	0.921672	0.977912	0.964659	1.01223	0.989285	0.901362	0.943215	0.926153	0.918495	1.07538	0.978127	0.950368
E9PPP8	MTMR1	92	1	1.48155	1.10204	1.18617	1.05143	0.888432	0.934536	0.919622	0.966029	0.96316	0.834517	0.948822	1.0067	1.18828	1.17922	0.975796	1.18352	0.969401	0.838938	0.845682	0.861623	0.942914	0.887588	0.740802	0.844729	0.925073	0.889601	0.842074	0.839058	0.735969	0.816581	0.887591	0.853461	0.950298	0.987513
E9PQ56	PUF60	170	1	1.02319	0.931409	0.916728	0.9518	0.970002	0.906589	0.99292	1.01789	1.0522	0.945721	0.836909	1.02777	1.04213	1.04384	0.965597	1.10211	1.18808	1.18115	0.890832	0.869432	1.02956	0.909483	0.942792	1.097	1.10135	1.16318	1.06774	1.06868	0.892224	0.9187	0.838371	0.798179	0.947334	0.946844
E9PQG4	PDE4DIP	2	1	0.93688	0.696979	NA	0.93457	1.10608	0.829784	NA	NA	NA	NA	NA	0.546242	0.894757	NA	NA	1.25761	NA	NA	1.76892	1.7595	1.02714	NA	NA	1.31429	1.20605	NA	1.21781	NA	NA	NA	1.77584	NA	1.44444	1.47262
E9PQR4	TUB	128	1	0.931016	0.949476	0.931832	1.05774	1.04985	1.01499	0.968432	0.968583	1.09585	1.01109	1.07844	1.06956	0.999165	0.98405	1.04856	0.963857	1.01471	1.06282	1.00284	1.04624	1.13214	1.13183	1.10336	1.02603	1.14429	1.03499	1.08766	1.01908	1.26781	1.17778	1.07087	1.27406	1.17159	1.15962
E9PRG8	C11orf98	24	1	0.681381	0.893906	0.816544	0.978323	0.966738	1.04664	1.11668	0.932059	1.02931	1.12814	0.985624	0.994944	0.966242	1.01393	0.968929	0.818657	0.969576	1.11917	1.01715	1.42343	1.17475	1.27612	1.20187	1.15988	1.23442	1.04778	1.01646	1.163	1.13842	1.10933	1.29655	1.33972	1.56446	1.47767
E9PRH7	MAPK3	2	0.9993	1.13278	NA	NA	1.25948	1.03202	NA	1.05038	1.14667	NA	NA	NA	1.01468	NA	0.861497	0.832803	1.0887	1.03738	NA	NA	NA	1.08648	NA	NA	NA	1.26546	1.07085	NA	0.974441	NA	0.929868	NA	NA	0.809736	0.776075
E9PRY8	EEF1D	244	1	1.30094	1.12267	1.1403	0.999854	1.01397	0.931782	0.967585	0.977718	1.07475	1.07536	0.966599	1.08834	1.09269	1.01093	1.0241	1.05757	1.10685	0.956067	0.869332	0.777878	0.791529	0.839092	0.770103	0.912475	0.879955	1.08564	0.974443	0.842737	0.780296	0.805202	0.738078	0.745457	0.727707	0.824082
E9PSI1		1	1	0.882148	NA	NA	1.05062	1.15472	NA	NA	NA	NA	NA	NA	1.08882	NA	NA	NA	1.2244	NA	NA	NA	NA	1.55572	NA	NA	NA	1.37346	NA	NA	NA	NA	NA	NA	NA	1.59843	1.34554
F1T0E5	CADPS	6	1	1.5863	1.06009	NA	1.08233	0.783401	0.894282	0.642749	0.928127	NA	NA	NA	0.964699	0.931035	1.05052	0.80008	0.946929	1.11362	NA	1.04418	0.894521	0.743734	NA	NA	0.869127	0.854971	0.886167	0.939701	0.856428	NA	0.852563	0.996905	NA	0.707651	0.879482
F2Z2I8	STOML2	5	0.9998	1.14992	NA	1.47541	1.24802	1.11178	NA	0.930823	0.979931	0.982751	0.912574	0.866709	0.881541	NA	0.705668	0.70676	1.12176	0.860182	0.918814	NA	NA	0.94724	1.11747	0.939081	NA	1.0381	1.03414	NA	0.777825	0.592283	0.750231	NA	0.612115	0.703201	0.863067
F2Z2J1	RPS6KA2	129	1	1.25477	0.981297	0.883924	0.96666	0.945663	1.09343	0.934365	0.987656	0.968162	0.964104	0.968659	0.984345	0.936546	1.1605	0.944939	1.08189	1.00673	1.12634	1.01909	0.971758	1.02805	1.09136	1.01965	0.974857	1.33601	1.10876	1.14234	1.1055	1.18125	1.25567	1.45424	1.34721	1.25155	1.24898
F5GWR7	PTPRD	210	1	1.02362	0.992183	1.00558	1.00348	1.13632	1.06107	1.00261	0.924414	0.985387	0.927308	1.01741	1.00615	0.930922	1.0275	1.10229	1.02722	0.888122	1.17717	1.15906	0.955733	0.931695	1.01788	1.08678	0.895045	0.885918	0.92477	0.893485	0.902376	1.00472	1.14355	0.961883	1.08027	1.05923	1.05685
F5GWU8	RAP1B	7	1	1.23914	1.04148	0.698863	1.05866	1.01839	1.30185	0.905956	0.875762	0.860358	1.06752	1.0352	1.01882	1.28702	0.948172	1.08156	1.11001	1.08703	1.12421	1.14129	1.02858	1.05462	1.03965	0.914103	1.19172	1.00698	1.00551	1.23608	0.986021	1.25888	0.852906	1.23922	0.722234	0.751846	0.847448
F5GX00	SYT7	31	1	0.994496	0.861316	1.08549	1.0524	0.955217	1.06194	0.908879	0.897953	1.09787	1.12336	1.05458	1.26557	0.933761	0.856455	0.937759	0.971237	0.917812	1.01379	1.08131	1.54828	1.10037	1.11392	1.17293	0.896524	0.921601	0.954528	0.962177	0.881635	1.00663	0.867882	1.09374	0.892239	1.4469	1.2191
F5GXQ8	SYNE1	3	1	1.04694	NA	1.37675	0.934087	1.02384	NA	NA	NA	1.20495	1.14714	1.07851	1.02245	NA	NA	NA	0.88585	NA	1.07963	NA	NA	0.72363	1.16059	1.17955	NA	0.967205	NA	NA	NA	1.54306	NA	NA	1.36231	0.946023	1.16965
F5GYV5	ARL6IP4	36	1	0.862537	0.962892	1.02416	1.07277	1.08029	1.24343	0.99514	0.738922	1.10496	1.09852	1.13524	1.21044	1.02386	1.19413	1.03536	1.10178	0.983618	1.02301	1.16602	1.0913	1.07623	1.24355	1.05124	0.905297	0.952026	0.834892	1.0972	1.02315	1.07802	0.981178	1.26902	1.31007	1.07219	1.23903
F5GZ38	PLEKHB1	103	1	0.60869	0.958437	0.8692	1.12086	0.868348	1.20158	1.09486	1.31991	1.08555	1.05128	1.24083	1.02961	0.989092	1.10373	0.837264	1.03471	0.970193	1.05626	1.37953	0.943742	0.90245	0.826199	1.0923	0.792367	0.693395	1.02831	0.863138	0.758268	0.772122	0.766931	0.715801	0.694093	0.758718	0.916819
F5GZG1	RAP1B	71	1	1.05429	0.985571	0.935696	1.14663	1.09305	0.961608	0.918746	1.06533	0.958251	0.983706	0.86598	1.07985	1.09903	0.991319	1.00704	0.989027	0.943371	0.901962	1.10207	0.898168	0.999668	1.01644	1.04298	0.991275	1.06506	0.971764	1.03966	0.953426	0.983124	0.962867	0.949313	0.878415	0.946609	0.999977
F5H100	GNB3	6	1	1.00727	0.786938	0.938192	1.00662	1.41161	0.868445	1.09395	1.36362	1.08033	1.1284	0.813502	1.24423	0.900416	1.16348	0.997274	1.09209	0.992554	1.16462	1.07882	1.08373	1.08026	1.42399	1.20588	0.872547	1.17003	1.0085	1.29204	0.890285	1.1218	0.85267	1.0756	1.68161	1.00861	1.71733
F5H136	TCP1	7	1	1.72659	1.22362	1.40291	1.17	1.36446	1.04607	0.954544	0.945635	0.847169	0.715233	0.90687	0.888735	1.05603	0.869231	1.08045	1.12597	0.741427	0.688504	0.531169	0.774173	1.01909	0.680735	0.720008	0.804337	0.92688	0.728859	0.695538	0.630019	0.604776	0.56419	0.499907	0.628903	0.759048	0.71005
F5H265	UBC	80	1	0.757631	1.31566	0.975276	1.12041	0.958014	1.12413	1.05319	1.11471	1.01379	1.17584	1.23115	1.44623	1.04438	0.968738	1.29997	0.888081	1.06343	0.859535	1.23159	1.04485	0.833416	1.03387	0.965846	1.18764	0.790443	1.07381	1.04461	1.16507	1.05684	0.974611	0.794469	0.84513	0.86446	1.01626
F5H2F4	MTHFD1	270	1	1.47317	1.04462	0.928367	1.05652	1.03165	0.948667	0.86847	0.97964	0.970543	0.967875	1.01327	0.950493	0.978347	1.06293	1.05797	1.10394	1.02578	0.902563	0.974149	0.934786	0.945748	0.942494	0.950832	1.01723	1.06262	1.01716	1.15449	0.972401	1.11225	1.18853	1.5164	1.3193	1.07671	1.26775
F5H345	HMBS	48	1	0.937801	0.886249	1.03125	1.07819	1.12623	1.04334	0.975794	0.984419	0.895181	0.873552	0.922755	0.857685	0.846305	0.957988	1.11629	0.973316	0.872626	0.831842	0.965508	1.03161	1.16921	1.0697	1.09022	0.889856	1.18401	0.850762	0.859739	1.15392	1.86527	0.836475	0.684339	1.14553	1.11906	0.971652
F5H3S6	TOM1L2	8	1	1.06949	0.963828	1.01495	0.880333	1.10608	1.10403	1.04483	0.891691	0.878688	1.00654	1.12123	0.895127	1.0001	1.06176	1.0681	1.08411	0.631724	1.16481	0.982613	1.22718	0.998251	1.10376	1.18666	1.05344	1.07537	0.882024	0.955948	0.95045	1.27773	1.19138	1.32898	1.24387	1.06765	1.18564
F5H459	AP3S1	16	1	0.95874	1.1255	1.0447	0.975862	0.997424	0.984174	0.936098	1.15081	1.0435	1.18234	1.16013	1.02294	1.09529	1.25604	1.17776	0.816442	1.09014	0.856395	1.00069	1.01705	0.878386	0.916998	0.937985	1.27221	0.837793	0.822664	0.986301	0.896101	0.729206	0.727002	0.832612	0.730338	1.04603	0.840378
F5H6T5	ARF3	8	1	0.818085	0.889988	0.576715	0.780524	1.04741	0.715173	0.812967	0.828513	0.565285	1.06902	0.864439	0.798049	1.07134	0.750059	0.829801	0.714206	0.900354	0.827214	0.88357	0.643375	1.04407	0.666205	1.1229	0.730585	0.637712	0.952318	0.75221	1.02232	1.23534	0.818289	1.15695	NA	0.667153	1.36793
F5H7S3	TPM1	233	1	1.67709	1.42326	1.17215	1.05521	0.986236	1.06972	0.840832	1.33324	0.797895	0.865835	0.943017	1.05165	0.966717	0.810747	0.908762	1.12662	0.931389	0.923755	0.686718	0.75081	0.70098	0.816592	0.675283	0.783917	1.05809	1.03669	0.92527	0.686326	0.943049	0.919726	1.01156	0.705537	0.743461	0.790475
F5H7V9	TNC	1	1	0.707413	NA	NA	0.785943	0.722712	NA	NA	NA	NA	NA	NA	0.571914	NA	NA	NA	0.661438	NA	NA	NA	NA	1.01365	NA	NA	NA	1.26872	NA	NA	NA	NA	NA	NA	NA	0.939786	1.31166
F5H867	SLC3A2	20	1	1.13382	0.966202	0.988038	0.9507	0.992934	0.925565	1.12738	0.851334	0.901177	0.924982	0.882938	1.0656	1.05882	1.12937	0.905774	1.18138	0.840346	0.718529	0.782849	0.888697	1.02623	0.912753	0.850646	1.21325	1.00409	0.812844	0.745398	1.01744	0.815806	0.847775	0.762569	0.854619	0.91655	0.944013
F6SYP7	DGCR2	7	1	0.768124	1.17701	0.724789	0.833764	0.997916	1.1255	0.888335	1.09074	0.77244	0.904524	1.14567	0.999075	1.47145	1.0366	1.09777	0.886803	1.0096	1.02907	2.11972	1.46615	1.27261	1.11792	1.38368	1.61867	1.43347	1.1705	1.41139	1.1161	1.51186	1.06641	1.67364	1.28069	1.04868	1.34988
F6U1T9	PPP3R1	212	1	1.39921	1.78497	1.03855	1.00121	0.99868	1.00946	1.268	1.16438	1.03244	1.10682	0.970193	1.34164	1.12688	1.08571	1.52104	0.989617	0.887553	0.61216	0.519012	0.554362	0.47939	0.617472	0.465835	0.752343	0.485912	0.53763	0.67527	0.415264	0.525065	0.420737	0.389192	0.372165	0.352513	0.320153
F6UXX1	SYNCRIP	1	0.9939	NA	NA	1.05154	NA	NA	NA	NA	NA	0.435726	0.737881	0.734966	NA	NA	NA	NA	NA	NA	0.930433	NA	NA	NA	0.614401	0.672684	NA	NA	NA	NA	NA	1.30577	NA	NA	NA	NA	NA
F6VDE0	SMARCA2	64	1	0.959665	0.930014	0.780595	1.04656	1.08982	1.14214	0.948554	0.758778	1.07568	0.913908	1.03993	1.10622	1.05335	1.0025	1.07856	0.977355	1.10738	0.874995	1.08701	1.0657	1.03559	1.18637	1.19461	0.974378	1.07918	1.15744	1.28515	1.03846	1.1331	1.02023	0.895019	1.07703	1.12406	0.983462
F6X3N5	GNB1	8	1	0.994878	1.07461	1.04572	1.01029	0.926964	0.993321	1.08804	1.27234	1.32883	1.13878	1.10979	1.19575	1.24313	1.17832	0.696369	1.00591	1.15771	0.969802	1.11358	1.1061	0.933057	0.949188	0.634362	1.11211	0.85595	0.874786	1.01447	0.907393	0.659919	0.789909	1.31071	1.08844	1.29205	1.18572
F6X4M4	hCG_2002594	13	1	1.55364	0.736556	1.45024	1.10472	1.20638	1.03495	0.644891	1.29515	1.3697	1.26033	1.18034	0.865227	1.05415	1.13795	0.642292	1.11962	0.994264	0.950718	1.15754	1.22026	0.944975	1.08446	0.992248	1.18262	1.1825	0.845164	0.960405	1.13056	0.64182	0.771087	0.905799	0.855734	0.778763	0.566427
F8VQQ4	TUBA1A	12	1	0.878461	0.922854	0.98048	0.9974	1.03761	1.01372	0.936924	0.967896	0.726094	0.936986	1.01416	0.983542	1.08622	0.753135	1.23124	0.783514	0.853995	1.25118	1.13595	0.967164	0.935612	1.00258	1.06004	0.919145	0.832475	0.823115	1.20821	1.21434	1.30468	1.18014	1.1661	1.41088	1.29888	1.16276
F8VQZ7	METAP2	16	1	0.917818	1.15972	0.995043	0.772564	1.01075	1.24305	1.39581	1.1749	0.893182	1.17033	1.24684	1.16337	1.00466	1.17738	1.09569	0.795179	0.967062	0.77767	0.978674	0.894008	0.901857	0.970105	1.08479	0.956674	0.732528	0.838517	0.77963	0.908501	1.17898	0.904871	0.973767	1.0136	0.795625	1.05436
F8VR14	ANKS1B	94	1	1.65317	1.44379	1.02616	1.07984	1.00832	0.887552	0.798114	0.912395	1.03788	1.08099	1.01255	1.00663	1.22997	1.0225	1.11451	1.03637	0.872355	0.594327	0.51766	0.475807	0.607701	0.588598	0.547637	0.731359	0.557062	0.666979	0.717294	0.543976	0.705387	0.659414	0.517905	0.583279	0.656333	0.617078
F8VRZ4	TUBA1A	6	0.9981	0.854999	1.03336	1.0692	1.01504	1.22735	1.28315	1.02085	1.023	1.35904	1.31234	1.1535	0.917965	1.06117	1.02589	1.06519	0.918185	0.896066	1.00757	1.11561	1.4592	1.20942	1.28684	1.57323	1.15271	1.08787	0.841505	1.21773	1.43666	1.62282	1.258	2.00534	1.01598	0.943156	1.18766
F8VS61	KRT77	2	0.9932	0.556823	NA	NA	0.904795	0.992983	NA	1.29636	0.792814	NA	NA	NA	0.904432	NA	0.703143	0.645407	0.756139	0.995996	NA	NA	NA	1.75052	NA	NA	NA	1.04508	0.884885	NA	0.672693	NA	1.02108	NA	NA	1.66337	1.00805
F8VVT9	AGAP2	265	1	1.18635	1.01369	0.891821	1.07013	1.01163	0.8749	0.876125	0.973124	0.973542	0.965902	1.03864	1.07242	1.17367	1.05715	1.0579	0.978323	1.22314	0.792281	1.04112	0.967905	0.981111	0.913574	1.11737	1.04231	0.847037	0.938007	1.00578	0.93531	1.18538	1.14898	1.16011	1.25816	1.24077	1.16312
F8VWH9	ARFGAP1	8	1	1.95751	1.45663	1.19428	1.14422	1.08949	1.08546	0.958505	0.991465	0.958002	0.740281	1.12294	1.36415	1.29723	1.3951	1.04267	1.27213	0.939457	0.631811	0.670376	0.745386	0.616105	0.620474	0.427286	0.564547	0.653153	0.739977	0.661306	0.735574	0.638077	0.646709	0.692708	0.421286	0.653032	0.604926
F8VWQ5	CS	3	0.9989	NA	0.91688	0.937162	NA	NA	1.17009	1.11179	1.15973	1.07578	1.04045	0.932187	NA	0.894142	0.921829	1.12363	NA	0.881807	1.03617	1.10895	1.13938	NA	1.02659	1.14335	0.927383	NA	1.01602	0.847296	1.08621	1.20818	1.14248	1.10875	1.28803	NA	NA
F8VXC8	SMARCC2	231	1	1.08078	1.07024	1.02601	0.998476	1.15264	1.15798	1.07097	0.950041	0.938117	0.990474	1.00453	1.03107	0.819188	0.778841	1.09348	0.889068	1.04398	0.978747	1.13548	1.11897	0.983679	0.993859	1.12665	0.974341	0.992763	1.06131	1.17263	0.998116	0.947122	0.969225	0.96207	0.917083	1.00459	0.929182
F8VYK8	PFKM	1	0.9998	0.622425	NA	NA	1.23908	0.90775	NA	NA	NA	NA	NA	NA	0.884221	NA	NA	NA	0.577103	NA	NA	NA	NA	1.11108	NA	NA	NA	0.936715	NA	NA	NA	NA	NA	NA	NA	1.02357	0.99803
F8VZ52	DNM1L	184	1	1.92257	1.19473	1.18266	0.947927	1.01503	0.847715	0.906676	0.91978	0.85645	0.873199	0.949777	1.06522	1.19492	1.00242	0.97135	1.21154	0.980546	0.836798	0.767298	0.770862	0.838499	0.861371	0.785597	0.901222	0.722366	1.01013	0.915156	0.831026	0.765065	0.828967	0.774348	0.786899	0.679955	0.632103
F8VZN8	PPP1R12A	2	1	NA	NA	NA	NA	NA	NA	0.860684	0.955812	NA	NA	NA	NA	NA	0.918715	0.809125	NA	0.941681	NA	NA	NA	NA	NA	NA	NA	NA	1.0746	NA	1.40101	NA	1.09903	NA	NA	NA	NA
F8W060	OSBPL8	2	1	NA	1.05602	NA	NA	NA	0.852792	1.96334	1.67279	NA	NA	NA	NA	1.10788	1.10274	1.39085	NA	1.05715	NA	1.1085	1.02596	NA	NA	NA	1.11002	NA	1.3256	1.34527	1.42433	NA	1.23786	1.54311	NA	NA	NA
F8W0P7	ATP5F1B	14	1	1.00982	1.04972	1.01682	1.11007	0.994716	1.05401	1.13332	1.05481	0.964055	1.03445	1.02277	0.950983	1.07586	1.00086	1.08726	0.937577	1.09104	0.974184	1.33419	1.13275	1.00434	1.01928	0.972609	1.35735	1.05367	1.25177	1.25046	1.25571	1.10246	0.963733	0.864167	1.545	1.10109	1.03745
F8W0Q9	PPHLN1	13	0.9976	1.20393	1.0713	0.955869	1.10171	1.16988	1.04903	0.925661	0.996652	0.917611	0.867515	0.867221	1.02733	0.924877	0.893223	1.02559	1.11423	0.938731	0.870316	0.862895	1.32682	1.06296	0.972466	1.13113	1.04195	0.979123	1.04453	1.04237	1.13475	0.914463	1.1515	1.35979	1.15563	1.54602	1.1538
F8W6W4	KCNAB1	64	1	1.09226	1.04998	0.987537	1.13509	1.00763	0.982601	1.05951	1.02027	0.898731	0.853116	0.996869	1.02629	1.11598	1.06745	1.10361	1.0493	1.10204	0.890337	0.934882	0.970018	0.926068	0.788615	0.979349	0.951656	0.967958	0.945686	0.913746	0.840443	0.800646	0.864112	0.90694	0.789022	0.868344	0.864301
F8W7C6	RPL10	8	1	1.09538	0.899911	0.616209	1.07192	1.06745	0.982557	1.07677	0.915187	1.20467	1.38787	1.05393	1.23587	1.24448	1.28111	0.791019	0.829557	1.57333	0.911909	1.17218	1.04306	1.02805	1.10752	1.47863	0.730843	1.15817	0.931704	1.20917	1.07476	1.52841	0.837465	0.832717	1.14056	1.28106	0.859427
F8W7E0	CAST	21	0.9988	0.695824	0.760389	0.911387	0.942447	1.25076	1.3847	1.11338	0.991755	1.14048	1.25055	1.21848	0.905056	0.709953	0.770384	0.834521	0.759106	0.881023	1.04051	1.24089	1.89619	1.39012	1.10547	1.28402	1.33522	1.49783	1.06717	0.840383	1.25004	1.4417	1.02208	0.939926	1.05892	1.08008	1.11674
F8W7G1	CD200	7	1	1.05393	0.917243	1.10248	1.04647	1.1756	0.772133	0.973024	1.01124	1.06971	0.859435	1.0882	1.12629	0.950788	0.670934	0.879729	0.855904	0.783368	0.891762	0.821308	1.00091	0.981122	1.02512	0.799299	0.937463	1.10224	1.09126	0.877012	0.867814	0.939107	1.0113	0.974035	0.684386	0.736594	0.982827
F8W9U4	MAP4	409	1	1.096	1.09527	1.07164	1.04976	1.11497	1.09484	0.999673	1.01089	1.02736	1.03192	1.09222	0.900043	1.35594	0.930832	1.17766	1.0131	0.900943	0.767875	0.961809	0.974317	1.02094	0.952877	0.991183	0.927477	0.934514	0.912629	0.874632	0.876155	0.959447	0.95167	0.877699	0.959096	0.843797	0.868725
F8WAZ6	PMPCB	5	0.9997	NA	0.98801	0.870226	NA	NA	0.939514	1.14223	1.05697	1.08461	0.922723	0.947372	NA	0.886535	1.37908	1.17537	NA	1.17842	0.919052	0.952593	0.935308	NA	0.934721	0.896911	0.862895	NA	1.00921	1.14856	1.22227	1.0541	1.3767	1.74629	1.27754	NA	NA
F8WBQ1	ICA1L	59	1	1.43055	1.02122	1.07104	1.03834	1.0305	1.01491	0.938595	1.02761	0.873815	0.980095	0.972139	0.925542	1.00566	1.10147	0.998213	1.12653	1.02633	0.996095	1.04358	1.00925	1.01088	0.968278	0.991147	0.90897	0.925433	0.941424	0.863076	0.893818	0.932	0.95526	1.1762	1.04102	0.992381	1.00501
F8WCA0	VAMP2	125	1	0.986282	1.15592	1.00895	0.959145	0.911322	0.980576	1.01763	1.01288	1.1304	1.08443	1.02008	1.34171	1.15752	1.09306	1.01643	0.953074	1.23665	0.797614	0.875241	1.08881	0.819194	0.809101	0.721278	1.17631	0.778961	0.76372	0.917256	0.990933	0.723755	0.728505	0.940331	0.752178	0.717791	0.800091
F8WF23	SYNPR	11	0.9998	0.884031	0.94087	0.944056	1.02679	0.887331	0.95771	1.01278	1.18112	1.21651	1.05944	0.997859	1.01797	1.6837	1.12199	0.886364	0.685034	1.37806	0.567497	1.08323	1.57491	1.36125	0.947613	1.0401	1.37099	1.03877	1.07494	1.17306	0.829246	1.07723	1.0983	1.87301	0.989586	1.55553	1.26303
G3V126	ATP6V1H	262	1	2.2789	1.25292	1.38462	1.1071	1.01574	0.978695	0.942457	1.07248	0.823343	0.754833	0.901563	0.99603	1.11281	1.0324	1.04128	1.22965	0.867829	0.713638	0.804961	0.651951	0.689044	0.697374	0.601984	0.764065	0.735068	0.879627	0.838514	0.73707	0.607833	0.729004	0.696238	0.687256	0.686402	0.656006
G3V1N2	HBA1	20	0.9995	0.607979	0.919677	0.846854	1.06004	2.03157	0.731767	0.82884	0.963746	0.2782	0.419535	0.715699	0.796591	0.413349	0.389932	1.26921	0.802415	0.407934	2.28359	3.51435	1.18401	1.07459	0.827295	1.61802	0.783333	0.458537	1.04996	1.06001	1.46134	1.5406	0.152777	0.486812	0.169297	0.146199	0.160895
G3V200	PPFIA2	227	1	1.29773	0.980194	0.99857	0.979672	1.07602	0.986652	0.898961	0.931037	0.948062	0.920687	1.00286	1.01571	1.03856	1.02254	1.06198	1.06067	1.02369	0.961613	1.04333	1.05232	0.980976	1.00417	0.967973	0.97574	0.969476	0.998202	1.10327	1.04036	1.12877	1.19285	1.19912	1.24657	1.05421	1.12747
G3V237	NDRG2	22	1	1.2343	0.955044	1.10806	1.01011	1.08167	1.05177	0.996794	1.12057	1.14324	1.09409	1.14749	0.93639	1.16827	1.03956	1.01323	0.978919	1.03173	0.967534	0.849534	0.808056	0.838342	1.14594	1.06601	0.97355	1.29434	1.17397	0.957118	1.35083	0.945455	0.798401	0.775151	1.079	0.692564	0.887416
G3V277	WARS1	8	0.9999	0.928407	0.913198	1.22278	1.06307	1.00899	0.965654	0.856954	1.066	1.03111	1.27385	1.45833	1.09592	1.00731	1.25086	0.890623	1.02805	1.05407	1.62083	1.42027	1.14306	1.36056	1.45384	1.91395	0.998069	1.06987	1.37574	1.04768	1.35986	1.89233	1.24693	1.30659	1.70887	1.33508	1.13879
G3V2A3	TUBB3	14	1	0.975321	0.918246	0.962495	0.887467	0.774639	0.896587	0.782155	1.10687	0.702809	0.89336	1.06549	1.18473	1.01998	1.36966	1.39652	0.801613	1.19746	0.953987	1.23032	1.03834	1.13604	1.03028	0.96735	1.17857	1.00649	1.4059	1.13289	1.51734	0.95771	1.53129	1.21518	0.976991	1.17044	1.19059
G3V2U7	ACYP1	105	1	0.706198	1.00509	0.952132	0.854247	0.840561	1.16329	1.09356	1.07197	1.72479	1.60439	1.09906	1.19232	0.332879	0.974116	0.911813	0.923734	1.17374	1.08664	1.24454	1.26478	1.02807	1.0186	0.947394	1.31066	0.957202	0.998567	1.05501	1.12401	1.12053	0.981683	0.850992	1.03738	1.13868	1.0815
G3V314	EVL	16	1	0.949095	0.964203	0.881059	0.851413	1.0129	1.01141	1.06833	1.14527	0.994441	0.943704	0.98568	1.03306	1.03601	1.05064	1.04986	1.04233	1.07612	0.938404	1.06818	1.03032	1.01093	1.01989	0.912265	0.87548	0.925925	1.08736	0.965101	1.18849	1.08548	1.05492	1.06873	0.983492	1.20679	0.907604
G3V325	ATP5MF-PTCD1	70	1	0.96315	0.653355	1.0312	1.35992	1.11676	1.07462	1.38124	1.91124	1.27872	1.15301	1.07663	0.968363	0.719209	0.838001	1.09002	0.795632	0.646914	0.849031	0.839713	1.89396	1.09099	0.9139	1.37283	1.336	0.966364	0.566748	0.696056	1.01821	1.86801	1.96652	2.23083	2.29449	1.80594	1.79324
G3V358	NDRG2	8	1	0.676793	0.942818	0.917177	1.02025	1.23214	0.787519	0.96097	0.657609	1.26784	0.932601	1.08603	1.1282	0.806574	0.949588	1.33295	1.21324	1.28027	1.03502	1.30919	0.912656	0.941493	1.43706	1.15579	1.20069	1.20649	1.13028	1.12744	0.992671	1.38463	0.864863	0.900444	1.1834	1.67362	1.51119
G3V392	NDRG2	6	1	0.973239	1.11428	0.815291	0.879618	0.751041	0.947446	0.676752	1.21766	0.603735	0.830222	0.518794	0.939814	1.38241	0.856116	0.873903	0.865463	0.927174	0.783063	1.50435	1.15762	0.921627	0.995418	1.13136	1.15726	0.910695	1.11468	1.30974	0.869093	0.473224	1.13946	1.17143	0.534027	0.654037	1.10856
G3V3A2	BEGAIN	13	1	1.68847	1.23628	0.962277	1.05842	0.996911	0.883469	0.845367	0.808824	0.947015	0.968167	1.00001	1.2243	1.05007	1.09864	1.08918	1.16527	1.00195	0.858959	0.974894	0.911718	0.813346	0.951799	0.999843	0.790905	0.876676	0.841759	0.942596	0.68022	1.14612	1.04327	1.57722	1.32892	1.17234	1.18391
G3V3R7	ATXN3	16	1	1.13351	1.1558	1.06515	0.925571	0.994675	0.833297	0.971247	0.898675	0.943567	1.02834	1.07465	1.16412	0.879383	1.04096	1.15021	1.07729	0.8353	0.867993	0.706267	0.583204	0.691821	0.808063	1.04583	0.743757	0.907993	0.854714	1.00276	0.722225	0.680262	0.709744	0.738799	0.904349	0.851056	0.61527
G3V479	CALM1	124	1	0.61023	2.4771	1.26735	0.522237	0.786764	0.821898	2.07688	1.88194	0.621563	1.01388	1.02494	2.06016	0.536363	0.88373	2.2531	0.617976	0.48672	0.596659	0.524525	0.545816	0.389798	0.432093	0.535002	0.513755	0.293988	0.359385	0.532743	0.368524	0.759057	0.538636	0.643533	0.438836	0.561987	0.586249
G3V4K3	VIPAS39	80	1	1.03985	1.08117	0.975031	1.00392	1.02324	1.12207	0.843562	1.11527	1.00503	0.973395	0.916885	0.968515	1.03854	0.969305	1.08438	0.977691	0.966736	0.973916	1.07738	1.01945	1.05529	0.957949	1.00413	1.01611	0.968961	0.954261	1.10325	1.0087	0.96846	1.20414	1.29952	0.995255	1.0476	1.13597
G3V4S2	NDRG2	6	1	0.683193	1.2438	1.27332	0.808942	0.767066	0.820711	1.06508	0.927732	2.04773	1.91893	1.16925	0.791593	0.715697	0.924376	0.722945	0.975082	1.54968	1.61468	1.29736	0.796333	1.10966	1.86314	1.65255	1.17382	0.843506	1.00284	1.16368	1.73043	1.49936	0.872235	0.917779	2.29446	1.03544	0.824095
G3V4X5	PSMA3	7	0.9994	0.970196	0.925765	1.08164	1.22341	1.33743	0.959116	1.01012	1.19089	1.0337	0.980979	1.02485	0.99623	1.05824	0.86551	1.10738	1.03063	1.02601	0.8604	1.02695	1.12078	1.27084	1.40681	1.33177	1.14383	1.20191	1.16325	1.13794	1.13465	1.07579	0.844906	0.977452	1.02844	0.828799	0.821942
G3V523	LOC730098	7	0.9999	0.598643	0.743836	0.678304	0.893639	0.521083	1.05999	0.912396	0.806072	1.11841	1.13892	1.2415	0.932977	1.00355	1.00796	0.799922	1.12972	1.19467	1.40144	1.6364	1.26399	1.06335	1.44906	1.77994	1.2413	0.879924	1.14686	1.0328	1.16113	1.75081	1.40679	1.23028	2.13738	0.904315	1.05157
G3V5G0	NDRG2	5	0.9998	2.31562	0.999067	NA	1.91254	2.24842	0.650234	0.769504	0.863759	NA	NA	NA	2.22435	0.86739	0.947126	0.69499	2.29256	0.715991	NA	1.15544	1.05199	2.74976	NA	NA	0.850562	1.61376	1.01475	1.20152	1.48881	NA	0.84564	1.09306	NA	NA	2.33814
G3V5P0	KTN1	8	0.9921	0.556621	0.490591	0.618978	0.932682	0.649544	0.735953	1.27299	2.46422	1.30541	1.18368	1.19301	1.14532	0.641164	1.17176	0.843105	0.776083	0.747577	1.07696	1.84869	3.96214	2.78922	1.77663	2.14357	1.89924	1.07555	0.886142	0.869533	1.86204	3.27803	4.04076	10.3685	6.7058	8.47028	6.77354
G3V5X4	SYNE2	5	0.9989	0.938117	1.07547	1.02998	1.39888	1.20063	1.06794	0.930566	0.81777	1.20369	1.12797	1.00793	1.1915	1.08324	1.2343	1.06613	1.17288	0.980484	0.949403	1.05686	1.29733	1.71178	1.41039	1.10712	1.17018	1.47133	0.910224	1.00828	1.02487	0.882046	0.955425	1.42948	0.872482	1.56351	1.66252
G3XAF7	BCAS1	7	1	1.11467	1.03805	1.45531	1.2944	1.65293	1.04218	1.09555	0.895387	0.845639	0.768655	0.812891	0.79672	0.974081	0.755884	1.1098	1.34914	0.799666	1.11699	0.543736	0.551256	0.694481	0.652023	0.554975	0.503234	0.461276	0.799358	0.563588	0.435784	0.709258	0.447938	0.294302	0.524027	0.359039	0.486426
G3XAH0	SEPTIN5	115	1	1.76708	1.51715	1.42135	1.0085	1.23293	1.09173	0.968237	1.09673	1.05686	0.95133	1.02696	1.04369	0.973825	1.10151	1.1545	1.14364	0.685863	0.662413	0.4538	0.57657	0.52132	0.507532	0.43225	0.685408	0.681662	0.531295	0.645309	0.587171	0.4305	0.749073	0.614206	0.655141	0.618901	0.631344
G5E948	MAP4K4	63	1	1.05763	0.881577	0.977283	1.02969	1.08509	0.903153	1.01183	1.0204	0.978205	0.966738	1.07999	1.00497	1.06864	1.03072	1.04582	0.974563	0.922995	1.01519	0.974223	1.07456	1.16745	0.992221	0.996846	0.959895	1.12362	0.958128	1.01537	1.17091	1.11962	1.26559	1.2604	0.97855	1.07603	1.27434
G5E9Q6	PFN2	61	1	0.829291	0.976205	0.81882	1.0589	0.813615	0.926423	0.84801	1.15769	1.39992	1.30264	1.00636	1.06499	1.14103	1.11833	0.834602	1.03636	1.28458	0.967094	0.895845	0.964316	0.975123	0.734184	0.880831	1.28507	1.6299	1.01871	0.977779	1.35779	1.2702	0.898569	1.23387	1.06429	0.885881	1.15145
G5E9S8	KLC1	201	1	1.54796	1.04652	1.08908	0.983464	1.12211	0.960978	0.927144	0.984325	1.04742	0.978198	0.950551	1.01185	0.993665	0.982777	0.980676	1.06539	0.872256	1.01743	0.929491	0.864506	0.890691	0.89633	0.85793	0.878509	0.90096	0.903674	0.924158	0.848736	0.893064	0.973149	1.14533	0.97816	0.932244	0.979427
G5EA09	SDCBP	98	1	0.961957	1.08056	0.988568	1.19336	1.12824	1.09333	0.9499	1.05308	1.08847	1.06393	1.03991	0.979562	1.04707	0.911971	0.970184	0.976108	0.995396	1.0668	0.972734	1.01696	1.06719	1.00094	1.13653	0.980001	0.977713	1.02041	0.894551	0.872568	0.948121	0.880037	0.950487	1.00757	1.0151	0.919546
G8JL96	PTPRS	16	1	1.23447	1.01872	0.920034	0.972857	0.964688	0.916142	0.835359	0.861224	0.978709	1.05091	1.15351	1.00882	1.21094	1.06444	1.20759	0.987795	0.911681	0.993008	1.04508	0.949152	0.888845	1.04081	1.00773	0.862469	1.07642	0.821912	0.922524	0.747111	1.25002	1.07981	1.02425	1.45249	1.26713	1.34022
G8JLA2	MYL6	12	1	1.24134	1.36991	1.26801	0.790817	1.007	0.70322	0.96137	1.08773	0.881622	0.911865	0.985261	1.20203	0.916888	0.893571	0.909653	0.972109	0.687902	1.0102	0.65206	0.553844	0.473023	0.760903	0.995317	0.749033	0.865943	0.882228	0.829009	0.587313	0.543075	0.733633	1.00566	0.860741	0.845843	0.813227
G8JLJ2	SOD2	2	0.9985	NA	1.053	NA	NA	NA	1.15486	1.34635	1.12633	NA	NA	NA	NA	0.795224	1.06521	1.16594	NA	1.02461	NA	1.23	1.3778	NA	NA	NA	1.15492	NA	1.03821	0.894033	1.10844	NA	1.49828	1.66587	NA	NA	NA
G9CGD6	CNK3/IPCEF1	68	1	0.953647	1.18239	1.11417	0.861976	1.09333	1.08759	1.07884	1.10341	1.18826	1.03397	1.01293	1.08757	0.900609	1.03926	1.06593	0.960888	0.860189	1.11761	1.01187	1.04569	0.906412	0.960923	0.895822	1.11387	0.872887	0.884114	1.03678	0.945257	0.95641	1.01169	0.83766	1.09081	0.940407	0.857652
H0Y2V6	CEP170	8	1	0.77187	0.899379	1.17098	0.862352	1.04382	0.987832	0.962716	0.926165	0.74215	0.935658	0.961269	0.87468	0.859923	0.810841	1.11919	1.00861	0.979925	0.798881	0.909991	0.99928	0.730319	0.919831	0.764521	0.971755	0.777855	0.932054	0.784829	0.878384	0.785483	0.906626	0.667662	0.676825	0.759109	0.591465
H0Y304	DMD	1	0.996	NA	NA	NA	NA	NA	NA	0.803172	1.07032	NA	NA	NA	NA	NA	0.698805	0.595445	NA	0.870464	NA	NA	NA	NA	NA	NA	NA	NA	1.17354	NA	0.948899	NA	1.00607	NA	NA	NA	NA
H0Y4B0	ERI3	162	1	1.3181	1.25849	1.0357	1.12724	1.13445	0.935535	0.952926	0.99321	1.10547	0.983041	1.03884	1.23143	1.44098	1.14851	0.9922	1.07989	1.05715	0.728121	0.803422	0.748652	0.767107	0.779661	0.721048	0.964425	0.796719	0.925582	0.937678	0.82714	0.587369	0.59292	0.532271	0.613214	0.585048	0.627564
H0Y4H1	PTPRF	8	1	1.05626	1.29926	1.03349	1.17732	1.01093	1.12958	0.850374	0.863553	1.087	1.06144	1.17283	1.11054	1.32452	1.0612	1.11849	0.950081	0.866702	1.21023	1.70095	1.14419	1.00582	1.21905	1.03221	1.14366	0.968594	0.772534	1.36817	0.826409	1.09859	0.964709	1.41725	1.32186	1.24779	1.2309
H0Y4M6	MCF2L	27	1	0.949292	0.873379	0.908608	0.841399	0.888047	0.952733	0.910041	0.973661	0.984599	0.929589	1.05492	1.21877	1.15212	0.893307	0.94608	0.797648	0.962701	1.05968	1.02434	1.09643	1.10735	1.21346	1.26211	1.11839	1.23719	1.04626	1.06447	1.25118	0.893508	0.875364	0.761822	0.839907	0.833954	0.9586
H0Y542	BCAS1	257	1	1.02942	1.0664	1.10805	1.50539	1.79781	1.22827	1.28924	0.787929	0.626363	0.625066	0.989679	0.760296	0.810524	0.929257	1.05673	1.33304	0.573673	1.14311	0.928649	0.651046	0.828235	0.710464	0.795202	0.684006	0.595788	1.13817	0.698242	0.661112	0.619826	0.658258	0.617902	0.573526	0.653576	0.594249
H0Y6V6	LMBR1	6	0.9959	0.930109	0.687082	1.3623	0.990903	1.15374	0.999642	0.802848	0.513355	1.24913	1.41046	0.827684	0.964685	0.75952	0.780267	0.727936	0.943941	0.802591	0.534522	1.16843	1.18298	1.49502	1.64987	2.07998	1.29827	1.11251	0.827564	0.974338	0.920003	1.53512	1.00989	2.38662	2.53494	2.03516	1.99731
H0Y770	DEPDC5	6	0.999	0.840348	0.805549	0.780084	0.840585	0.994656	0.859174	1.05262	1.02051	0.870657	1.09263	0.949116	1.02193	0.896517	1.0759	1.05388	0.810684	0.938565	1.09913	0.818679	1.26559	1.29942	1.16318	1.19362	1.1358	1.2416	0.943334	1.05586	1.25523	1.15639	1.40392	1.39527	1.54128	1.4012	1.46328
H0Y7D7	ATF6B	8	0.9864	0.847592	0.768974	0.862379	1.05549	1.02913	1.01471	1.10467	1.28071	0.952052	1.00017	1.08502	0.947522	0.763982	0.857442	0.785692	0.935607	1.09625	0.837293	1.41657	1.06651	1.31908	1.18946	1.27581	1.49061	1.84707	1.16019	1.35558	1.14729	1.02841	1.49355	0.819142	0.996623	0.78794	0.837979
H0Y886	NDUFB5	73	1	0.840997	0.974644	0.795587	1.25596	0.943104	0.744999	1.22075	1.57147	1.44699	1.21508	1.09951	1.29215	0.919796	1.02777	1.18536	0.714925	1.00901	0.92528	0.980744	1.63186	1.09119	0.936071	1.37461	1.36171	0.928042	0.652953	0.782205	1.01842	1.02046	1.00369	0.994068	0.83132	0.690582	1.0444
H0Y8B3	AHCYL2	8	0.9985	1.10598	1.21594	1.17715	0.85616	0.897704	1.12217	1.07089	1.28062	1.13634	1.25052	1.32159	1.25323	1.23071	1.16702	1.21631	1.00524	0.79185	0.762497	1.05837	0.877209	0.836608	0.779443	0.654364	1.21662	0.781806	0.697965	1.11532	0.814632	0.659086	0.55347	0.708723	0.917356	0.723287	0.927723
H0Y8C2	RPL22L1	1	0.9947	NA	NA	1.29483	NA	NA	NA	NA	NA	0.900736	0.837719	0.923891	NA	NA	NA	NA	NA	NA	1.30812	NA	NA	NA	0.948758	0.834299	NA	NA	NA	NA	NA	0.849605	NA	NA	0.694956	NA	NA
H0Y8M1	NPNT	4	0.9951	0.605868	0.887491	0.948259	1.33708	1.27495	1.10075	1.24483	1.20208	1.06287	0.90841	0.924826	1.02716	0.910192	0.902309	1.07593	0.801317	1.06562	0.967292	0.93344	1.88982	1.75932	1.18903	1.28668	1.22374	2.09178	1.25294	0.972518	1.75098	1.1142	1.9649	1.23973	0.951001	2.05153	1.39105
H0Y8U8	AFDN	298	1	1.0773	1.02448	0.963662	0.982115	1.01896	0.977523	0.952043	0.999684	0.939521	0.92453	1.00592	1.07899	1.08781	0.97443	1.01135	0.919173	1.00825	1.00535	0.965969	0.989478	1.03545	0.936953	0.971551	0.976166	1.01091	1.07163	1.02724	0.93622	1.05748	1.03949	1.1	1.09052	1.09314	1.07907
H0Y8W2	RACK1	8	1	1.34989	1.11393	1.21008	0.913383	1.04551	0.883929	0.789735	0.660987	1.01139	0.728749	0.83826	1.03952	1.26691	1.22187	0.836423	0.943686	1.50071	0.616035	0.777661	0.437041	0.401624	0.510279	0.370684	0.563965	0.581684	0.96655	0.735264	0.591969	0.297655	0.283192	0.438207	0.313146	0.318681	0.217216
H0Y8W3	RGS14	7	1	0.962297	0.931917	0.748133	1.10384	0.913715	0.828583	1.16553	1.18732	0.924703	1.18298	0.728043	0.959602	0.996596	1.10046	1.19107	0.928669	1.20166	0.91725	1.28362	1.17232	1.22269	1.06376	1.26965	1.27641	1.20179	1.266	1.04135	1.22134	1.43945	1.25538	1.29267	0.9499	1.3894	1.22203
H0Y8Y2	ANK2	37	1	1.00421	1.00528	0.976668	0.993129	1.04612	1.05113	0.875732	1.02088	1.06162	0.834661	0.912082	1.11386	0.869201	1.02674	0.862846	1.06066	1.02158	0.89904	0.640872	0.718455	0.802487	0.759405	0.702261	0.843264	1.0743	0.971196	0.824622	0.558844	0.665791	0.620546	0.817119	0.913888	0.95748	0.97791
H0Y9C2	CAMK2D	8	1	1.21118	0.908949	1.26369	1.4564	1.67741	0.958574	0.714198	0.876447	1.32868	0.901456	1.27519	1.09831	0.94618	0.797006	1.1234	1.00509	0.721635	1.58559	1.50323	1.03574	1.07206	1.36501	1.40016	0.796353	0.948124	1.01977	1.2587	1.04196	3.11068	0.940534	0.930981	1.35302	0.87452	1.39822
H0Y9E9	ANK3	25	1	1.01535	0.88666	0.947851	0.83716	0.946947	0.991682	0.877121	1.03439	0.926916	0.931509	1.00376	0.986953	0.915521	1.05053	0.973969	0.904757	1.00571	1.04644	1.1227	1.09941	1.02043	1.12903	1.21388	1.01694	1.03844	1.03279	1.15038	1.06054	1.28293	1.299	1.28003	1.44534	1.27129	1.06122
H0Y9Y2	BOD1L1	83	1	0.760144	1.08712	0.979994	0.880668	0.884662	1.12778	1.06679	0.948038	1.0449	1.0341	1.12562	1.08868	0.996261	0.92342	1.03069	0.89833	1.03622	1.09785	1.12182	1.35342	1.18776	1.29572	1.20245	1.26845	1.12988	1.0175	1.13099	1.14212	1.14648	1.26535	1.3601	1.24841	1.37802	1.24298
H0YA96	HNRNPD	6	0.9998	1.38506	1.2639	1.11602	0.588542	0.768768	1.2125	0.879668	1.1899	1.37225	1.21961	0.882458	0.895962	1.60178	1.31779	0.676315	1.22789	1.07888	1.02152	0.700005	0.350941	0.424228	0.629288	0.39891	0.774627	0.617866	1.16959	0.901717	0.533449	0.570696	0.279326	0.408817	0.905684	0.348459	0.59384
H0YAC5	REEP2	8	0.9999	0.971038	1.00285	0.933883	1.0491	0.930525	0.893514	0.965182	1.38366	1.13167	1.14259	0.952699	0.936868	1.01967	1.02738	0.874057	0.894919	0.881347	0.883473	0.80315	1.23301	0.901154	1.02924	0.949777	1.09546	0.849358	0.689395	0.794115	0.847965	1.08973	1.19424	1.23084	1.27033	0.965652	1.04706
H0YAK1	GRSF1	71	1	1.18265	1.02683	1.05684	1.00482	1.05366	1.00777	0.965703	0.93934	1.0092	1.00221	1.02762	0.899587	0.948765	0.950727	1.07007	1.09953	1.00221	0.958932	0.971843	0.991772	0.998634	0.982819	1.00366	0.916075	0.959665	1.04109	1.05506	1.01866	1.23503	1.0625	1.21988	1.38883	1.16953	1.11552
H0YAP0	ZC2HC1A	133	1	1.4191	1.11289	0.979413	1.09369	1.06545	1.06348	0.924057	1.06095	1.1126	0.929521	1.02283	1.11323	1.11618	0.949747	0.945879	1.00409	1.08445	0.873801	0.917731	0.834338	0.862955	0.826442	0.86134	0.873209	0.853607	0.841071	0.88677	0.768295	0.8693	0.994257	0.756768	0.91088	0.906242	0.893918
H0YAY0	TACC1	6	0.9998	1.0652	1.11043	0.936258	1.02299	0.787469	0.984137	0.90029	1.09273	1.00074	0.885178	0.774728	1.09091	1.19867	0.928957	0.913738	0.758448	0.915526	0.936217	1.13353	1.10581	1.03318	0.991013	1.02109	1.18618	0.912055	1.01754	1.13087	0.965517	0.820466	1.06728	1.27611	0.864808	1.14394	1.07185
H0YB09	DGLUCY	84	1	1.55469	1.31113	1.14138	1.11506	0.912467	0.936239	1.14521	0.705812	0.565654	0.637907	0.985211	1.19443	1.24502	1.06655	1.16727	1.03132	0.698183	0.872606	0.858927	0.738567	1.07841	1.16383	0.7583	0.78278	1.02991	0.786124	0.864432	0.939165	1.0136	1.26508	1.01687	1.09643	1.12055	0.807131
H0YBJ8	MTDH	3	0.9958	NA	0.859484	NA	NA	NA	1.11637	0.953195	1.0666	NA	NA	NA	NA	1.14502	1.27447	1.41422	NA	1.04217	NA	0.781465	0.794566	NA	NA	NA	1.20358	NA	0.624208	0.964645	1.14191	NA	0.867509	0.944364	NA	NA	NA
H0YBU6	RIMS1	70	1	1.20608	1.02859	0.885002	1.01178	0.998778	0.989271	0.906319	1.05498	1.13348	0.983962	0.987534	1.09143	1.17667	1.08683	1.14126	1.0069	1.18515	0.856447	1.03253	0.807528	0.842896	0.870207	0.964797	1.01621	0.914955	1.0222	1.06407	0.903918	0.918396	1.02493	1.20372	1.07742	0.92569	1.13393
H0YC04	ATP6V1B2	2	1	NA	NA	NA	NA	NA	NA	1.39199	1.41973	NA	NA	NA	NA	NA	1.13196	1.0004	NA	0.772888	NA	NA	NA	NA	NA	NA	NA	NA	0.979507	NA	0.723754	NA	0.780193	NA	NA	NA	NA
H0YC35	CLU	2	0.9962	NA	NA	0.80791	NA	NA	NA	0.994847	1.22406	1.25674	0.751366	0.772827	NA	NA	1.44822	1.55359	NA	1.02913	1.358	NA	NA	NA	1.32805	1.21088	NA	NA	1.53408	NA	0.857632	1.56112	0.842972	NA	0.889598	NA	NA
H0YCG2	LAMP2	5	0.9999	0.759254	0.875358	0.765802	0.956156	0.877384	1.04531	NA	NA	1.25609	1.23312	1.18448	1.04779	1.12126	NA	NA	1.01079	NA	1.22634	1.1248	1.07718	0.979448	0.916132	1.19936	1.15377	0.957895	NA	1.25503	NA	1.37931	NA	0.995108	1.34798	1.21713	1.18509
H0YCX3	SLC24A4	6	0.9997	1.15687	0.883187	NA	0.94965	1.02216	1.01913	0.920784	0.812877	NA	NA	NA	1.16501	0.860151	0.765096	0.802017	1.02605	0.762056	NA	1.35522	1.46802	1.18019	NA	NA	1.12139	0.969477	0.92303	1.32338	1.03897	NA	0.591933	1.63405	NA	0.975861	1.20254
H0YDB2	STIM1	93	1	0.877842	0.996662	1.03321	0.863746	0.951102	1.08869	0.996364	1.11345	0.901886	0.999137	1.10889	1.08724	0.93245	0.899071	1.05191	0.845134	0.886206	0.982854	1.07123	1.20686	1.08042	1.11616	0.992717	1.16119	0.983108	0.94226	1.04036	1.20309	1.02636	1.30655	1.28165	1.36265	1.20348	1.22397
H0YDE5	KIAA1549L	227	1	0.955757	1.08894	1.02786	0.902838	0.998891	1.00747	0.96582	0.929574	1.10325	1.05118	1.15886	1.15885	1.02338	1.09064	1.18637	0.917226	0.902283	0.900977	1.00725	0.945863	0.965734	0.920297	0.909864	0.996697	0.723636	0.725627	1.03031	0.95752	0.886491	0.903403	0.882597	0.994683	0.949359	0.975685
H0YDM4	HOOK3	97	1	1.64433	1.06129	1.04031	1.06373	1.15002	1.01657	0.879492	0.979318	0.940065	0.85119	0.922448	1.0059	0.905341	0.924106	1.04726	0.982632	0.918225	0.989504	1.0154	1.07222	0.937672	1.01013	1.02611	0.934195	1.02523	0.988325	1.0024	1.0751	0.988199	1.19107	1.23837	1.16629	1.13145	1.0841
H0YEE4	POLR2G	2	1	0.570711	NA	NA	1.46401	1.30331	NA	1.31049	0.537482	NA	NA	NA	1.23645	NA	0.894104	0.951505	1.1107	0.769905	NA	NA	NA	1.64564	NA	NA	NA	1.42075	1.25691	NA	0.769456	NA	1.52432	NA	NA	0.894026	2.35336
H0YEJ0	SAMD12	17	1	1.07563	1.18127	1.06283	0.901622	0.863098	1.10241	0.961367	0.920333	1.21205	1.11643	1.15599	1.19961	1.49346	1.04307	0.975785	0.899335	1.11161	0.887589	0.899342	0.769975	0.92419	0.880265	0.713232	1.11005	0.853999	0.898996	0.976172	0.827812	0.698616	0.804148	0.724151	0.71193	1.00938	0.822072
H0YET9	ARRB1	13	1	1.07595	0.97183	1.10781	0.794041	0.99041	1.10825	0.840063	1.02518	0.925172	0.955835	0.819749	0.991757	1.12495	0.994162	0.92298	0.98307	0.844349	0.899193	1.07697	1.23303	0.931027	1.22387	1.12748	1.11497	0.963445	1.17408	0.938015	1.39605	0.947351	0.974732	0.982373	0.693193	0.847345	0.671076
H0YF02	MBP	4	0.9984	1.99045	1.19631	NA	1.3161	1.32218	1.17665	NA	NA	NA	NA	NA	1.77214	0.789534	NA	NA	1.95136	NA	NA	2.16588	1.31792	1.86232	NA	NA	0.906331	2.00923	NA	1.23936	NA	NA	NA	1.369	NA	2.87066	5.6012
H0YFC4	C2CD5	8	1	0.923733	1.17633	0.978304	0.869373	0.888044	1.11208	1.04344	1.05809	0.798168	0.753647	0.984044	1.21643	1.10102	1.18912	1.30087	1.06234	0.99946	0.886587	1.01176	0.985701	1.21023	0.915464	0.804748	1.02206	0.942642	0.86921	1.02477	0.770643	0.891422	1.14552	1.32991	1.04763	1.41919	1.26879
H0YFP0	CADPS	1	1	1.20482	NA	NA	0.960832	0.881645	NA	NA	NA	NA	NA	NA	0.902946	NA	NA	NA	0.966164	NA	NA	NA	NA	1.16993	NA	NA	NA	1.01682	NA	NA	NA	NA	NA	NA	NA	0.796914	1.14123
H0YG16	KLC1	1	0.9952	NA	NA	1.21008	NA	NA	NA	NA	NA	0.748961	0.788424	0.970368	NA	NA	NA	NA	NA	NA	0.824998	NA	NA	NA	1.05071	0.938705	NA	NA	NA	NA	NA	0.883996	NA	NA	0.704921	NA	NA
H0YG38	PRPF40A	8	0.9999	1.25461	1.13656	1.5188	1.23752	1.28244	0.968848	3.41387	1.74716	0.763478	1.09055	0.947179	1.16985	1.02517	2.1552	2.72105	0.639011	1.71678	0.496591	1.0586	1.14922	1.10226	1.27556	0.881583	1.2133	1.09705	1.5431	1.1785	1.90547	0.61991	1.992	0.898511	0.768388	0.695347	0.756841
H0YH82	CS	1	0.9935	NA	NA	1.41724	NA	NA	NA	NA	NA	1.3269	1.0064	0.998894	NA	NA	NA	NA	NA	NA	2.05901	NA	NA	NA	1.79456	1.63526	NA	NA	NA	NA	NA	1.61492	NA	NA	0.882045	NA	NA
H0YHJ4	PPFIA2	2	0.9999	0.712309	NA	0.821442	0.969105	0.976117	NA	NA	NA	1.01155	1.07226	1.27579	1.03659	NA	NA	NA	1.0594	NA	1.62194	NA	NA	1.53207	1.6542	1.68183	NA	1.63857	NA	NA	NA	1.59338	NA	NA	1.58108	2.16331	1.38515
H0YI37	ATP5F1B	6	1	0.468648	0.639444	0.890899	0.855814	1.24702	1.00461	0.972502	0.589751	0.85981	0.772213	1.16936	0.835727	0.904199	0.581779	0.683389	1.0671	0.659889	1.22695	0.775643	1.38847	1.2216	1.0807	1.06502	1.32404	1.74643	0.880021	0.950758	0.761875	0.465241	0.768197	0.596062	1.36623	1.26684	1.77616
H0YI79	DNM1L	351	1	1.87925	1.04214	1.18852	1.03046	1.03462	0.813369	0.993139	0.860632	0.861131	0.836832	0.87671	0.899625	1.17048	1.13296	0.994656	1.31033	0.927818	0.980716	0.74787	0.735802	0.804184	0.811045	0.715944	0.888593	0.745524	0.99568	0.935092	0.812213	0.80732	0.775193	0.732112	0.780888	0.732359	0.755587
H0YIV4	NAP1L1	119	1	1.87779	1.1924	1.12971	1.04788	1.14638	0.858635	0.925167	1.04035	0.903659	0.927065	0.864183	1.03808	1.04417	1.09535	0.955003	1.37199	0.981207	0.936044	0.674403	0.552786	0.673746	0.834623	0.617322	0.907831	0.892233	0.892661	0.880861	0.729533	0.670459	0.775845	0.623044	0.687308	0.654241	0.763877
H0YIV9		28	1	0.925123	1.10279	1.18517	0.917054	1.08589	0.808764	0.951906	1.08827	0.853538	1.02565	0.965946	1.11137	0.890676	0.878459	1.12723	1.03584	0.844775	0.92488	0.918257	1.0348	1.10756	0.835372	0.786818	0.960252	0.993693	0.909189	1.0941	0.804182	0.853594	0.624884	0.868701	0.684225	1.01423	0.973917
H0YJ05	STON2	32	1	1.17281	0.881535	0.90812	1.16077	0.992818	1.0384	0.913913	1.00113	0.904312	1.01423	0.954126	0.922419	1.04965	0.910583	0.963932	1.00296	1.28011	1.16429	0.987913	1.0741	1.09224	1.07376	1.09582	1.04371	1.37636	1.19516	1.1489	1.11897	1.16162	1.40099	2.02817	1.44048	1.24361	1.54524
H0YJE6	SPTB	25	1	1.06369	1.03761	1.04314	1.01959	0.93741	1.01891	0.99383	1.03208	1.05268	1.10165	0.972452	1.12388	1.03228	1.16919	1.06627	0.848217	1.03454	0.921328	0.891706	0.88881	1.02388	1.17894	1.04489	1.05999	0.940236	0.985733	1.01287	1.05265	1.15522	1.08155	1.07631	0.984827	0.896895	0.926395
H0YK49	ETFA	55	1	1.47462	0.877099	1.11077	1.22855	1.27881	1.22241	0.947572	1.22654	1.08378	0.77709	0.848247	0.846901	1.04658	0.74169	0.774597	1.26394	0.915662	0.845036	0.613308	0.955075	0.787109	1.03139	0.7525	0.958433	1.31287	0.840907	0.789871	0.62262	0.519217	0.590195	0.383462	0.63758	0.44707	0.390922
H0YKC2	SCG3	15	1	0.837232	0.999292	1.02041	0.837671	0.93606	0.866564	1.13105	1.09322	1.25946	1.0877	1.09486	1.32374	0.955942	0.901199	0.85333	0.805798	1.24876	0.979852	0.904266	1.16456	1.02952	1.20472	0.899128	1.08674	0.836847	1.12521	1.03812	1.13513	0.756213	0.842263	0.701663	0.716099	0.618627	0.717578
H0YKC9	CERS4	10	0.9996	0.8222	0.881496	1.09203	1.01417	1.0283	0.942643	1.19307	1.15646	1.09161	1.48405	1.17189	1.06294	0.724898	1.51001	0.982175	0.933659	0.807749	1.08833	1.2559	0.990945	1.02372	0.884913	0.959454	1.06394	0.992031	0.869564	0.975413	0.816572	0.955003	0.836419	0.979362	0.934532	1.24154	1.22471
H0YKF0	ETFA	158	1	1.51097	1.09837	1.16756	1.21676	1.30195	1.35839	1.04286	1.34908	1.10253	0.703972	0.861779	0.849971	1.09569	0.953535	0.89909	1.18849	0.895318	0.799752	0.554301	0.656601	0.714534	0.992265	0.68593	0.810071	1.05003	0.860606	0.782554	0.585921	0.66299	0.759853	0.554207	0.624921	0.558628	0.652746
H0YKK6	PSME1	8	0.9981	0.946465	0.876809	1.15048	0.994747	1.07483	0.901049	1.05377	0.967071	0.75822	0.791844	0.775484	0.832647	0.866558	0.578229	0.751502	1.03174	0.805473	0.855289	0.793024	1.20326	1.09652	1.19282	1.03635	1.23759	1.67845	0.859778	0.793074	0.805158	0.860588	0.836994	0.825342	0.927328	1.23661	1.0169
H0YKT2	POU2F2	1	0.9977	1.03265	NA	NA	0.974377	1.06072	NA	NA	NA	NA	NA	NA	0.913868	NA	NA	NA	0.932166	NA	NA	NA	NA	0.952642	NA	NA	NA	1.16784	NA	NA	NA	NA	NA	NA	NA	0.860739	0.894082
H0YLM8	DMXL2	543	1	1.56247	1.04033	1.02852	1.09731	0.904361	0.917999	0.913694	0.968686	0.966693	0.869398	1.01615	1.01772	1.07558	1.04685	1.09098	1.01918	1.01201	0.939505	0.916375	0.852855	0.95514	0.898821	0.933648	0.933147	0.841531	0.960794	1.01459	0.87557	0.970785	1.0873	1.09486	1.02912	1.0391	1.02328
H0YLW0	SRP14	8	0.9946	0.731075	0.89169	0.944118	0.940797	0.826913	0.762252	1.18487	0.955516	1.32261	1.23762	1.06539	0.982319	1.31129	0.949643	0.811578	1.14598	1.25123	1.05713	0.670922	1.33168	1.09228	1.44395	1.12725	1.46615	1.49594	1.15817	1.08805	1.17339	0.711316	0.775934	0.442991	0.494146	0.609934	0.572225
H0YNE7	FGF7	7	0.994	1.06333	1.04183	0.85483	1.00452	1.0853	1.14061	1.06428	1.08411	1.07812	0.871795	1.36858	0.814181	1.01472	1.04782	0.798179	1.0788	0.866551	1.29666	0.912845	1.64322	1.06144	1.46224	1.439	1.24534	1.06442	0.830618	0.947601	0.674364	1.24466	0.557297	1.11304	1.26925	0.877041	0.780999
H0YNG3	SEC11A	27	1	0.620554	0.781482	0.765945	0.954075	0.793089	0.881027	0.985691	1.17652	1.00568	1.17282	1.10884	0.964184	0.807155	0.973486	0.922943	0.856629	1.01676	0.957154	1.21351	1.65019	1.27026	1.21829	1.46097	1.18464	1.37688	0.868794	0.908936	1.27219	1.75537	1.28451	1.27054	1.35814	1.07255	1.34837
H0YNS9	GMPR2	1	1	2.00964	NA	NA	1.38194	0.991373	NA	NA	NA	NA	NA	NA	1.78193	NA	NA	NA	1.70671	NA	NA	NA	NA	2.59763	NA	NA	NA	1.78523	NA	NA	NA	NA	NA	NA	NA	1.7308	0.871814
H0YNW7	GNB5	5	1	1.26144	1.38611	1.45632	0.95313	0.999555	0.933102	1.00635	0.854094	1.13145	1.16921	1.02814	1.13689	1.15492	1.12544	0.995576	1.26274	0.931565	0.834205	0.924136	0.819018	0.970261	0.895397	0.765217	1.0384	0.963435	0.769768	1.0495	0.762566	0.710049	0.768572	0.951277	0.563704	0.715606	0.880036
H3BLZ2	DBNDD1	16	1	0.536325	1.41982	1.17674	0.578551	0.859201	0.902239	1.31755	1.19298	0.752303	1.12917	1.16007	1.76119	0.766197	0.734709	1.32403	0.5966	0.588921	0.902665	1.09391	0.849123	0.893278	0.606992	0.825607	0.982125	0.876594	0.715657	0.920225	0.697748	0.827895	0.574715	0.88214	0.738146	0.989795	0.815282
H3BMM5		7	1	1.71545	1.06724	1.13619	1.14439	0.946872	0.994717	1.00764	1.10843	1.13141	1.02528	0.823712	0.880135	1.02873	1.23015	0.88187	1.34715	1.05034	0.982104	0.625132	0.90541	0.768372	0.845355	0.748719	0.955443	1.04961	0.838933	0.896887	0.940203	0.685198	1.22977	1.41754	0.80056	1.19015	0.940364
H3BN78	SYT17	34	1	1.09836	1.04017	0.960126	0.946366	0.861446	0.999008	0.888454	1.03237	1.14604	1.20936	1.19299	1.09323	0.956928	1.02133	0.98625	1.06213	1.00355	0.707377	1.10869	0.947335	1.09348	1.04993	0.900493	0.994854	0.989857	1.06009	0.918962	0.850047	1.13695	1.02669	1.31131	1.34726	1.35999	1.32969
H3BN98		8	0.9975	1.94513	1.10953	1.13935	1.07764	0.865827	0.962138	1.1409	1.72605	1.28138	0.848493	1.01955	1.36721	1.0266	1.22548	0.990558	1.14891	0.938778	0.557142	1.03961	0.601907	0.56992	0.441115	0.539329	0.941203	0.578858	0.805423	0.89351	0.522832	0.361251	0.341256	0.360334	0.528316	0.270071	0.422763
H3BNC9		135	1	0.705361	1.00231	0.798887	0.983549	0.959232	0.963305	0.906633	0.898739	1.60592	1.44872	1.16896	1.24854	1.30988	1.12047	1.06776	0.797667	1.40775	0.831902	0.952687	0.848772	0.739673	0.784048	0.884449	0.927988	0.877659	1.01467	1.17124	0.79285	0.796561	0.692908	0.679931	0.750693	0.723824	0.816445
H3BNI4	ATP6V0C	19	1	1.20304	0.755673	0.675642	1.279	0.845049	0.878471	1.06372	1.34225	1.83126	1.61315	1.29788	1.43775	0.81633	0.857785	0.909517	0.60428	0.928035	0.892272	1.04184	1.93046	1.41527	1.05788	1.12551	1.41743	0.914478	0.856591	0.811724	1.1526	0.587415	0.743247	0.857376	0.878944	0.771447	0.652914
H3BNK4	NDRG4	8	0.9999	1.24847	1.05815	1.19237	0.974083	1.14053	1.11914	1.22808	0.94327	0.902835	1.02406	1.05864	0.962454	1.23101	1.19403	1.18486	1.02296	0.836478	0.671529	0.636313	0.741665	0.827131	0.931572	0.809944	0.894642	0.789294	0.920182	0.797536	0.761009	0.642182	1.06039	0.83832	0.915584	0.713295	0.843933
H3BPS1	TRAPPC2L	1	0.9938	0.756584	NA	NA	0.852414	0.996461	NA	NA	NA	NA	NA	NA	0.915467	NA	NA	NA	0.881893	NA	NA	NA	NA	1.51705	NA	NA	NA	1.02978	NA	NA	NA	NA	NA	NA	NA	1.09462	1.06354
H3BPS8	ALDOA	5	0.9926	0.433122	0.795165	0.787484	0.662331	0.566899	0.784369	0.969588	0.671054	1.26311	0.824291	0.981972	0.462834	0.701434	0.748249	0.852748	0.623362	1.0012	0.816186	1.16818	1.03908	0.93453	1.43247	0.90992	0.982203	0.699713	1.20488	1.02826	1.50189	0.738688	0.806545	0.95624	0.641577	0.710673	0.810574
H3BQK9	MACF1	816	1	1.42932	0.970993	1.00686	1.06083	1.08161	1.03838	0.866658	0.970916	0.980506	0.89195	0.991593	0.997922	0.90762	0.876728	0.98333	0.894012	1.03696	1.01288	1.09928	1.06747	1.03015	1.02825	1.03868	0.95013	1.03187	1.07493	1.0985	1.02065	1.04747	1.18452	1.29348	1.18568	1.21406	1.22683
H3BR92	NDRG4	28	1	1.27223	1.12948	1.28499	1.02775	1.10919	1.10579	0.994431	1.03371	1.04267	1.02907	0.992815	0.879463	1.27515	1.12308	1.03641	0.957747	1.00801	0.703927	1.04374	0.866173	1.009	0.987329	0.801562	0.902146	0.805787	0.881912	1.00309	0.727504	0.861788	0.624501	0.831514	0.67828	0.537402	0.660397
H3BRM6	GSTM1	6	0.9978	0.999434	0.975827	NA	0.602921	1.03838	0.444978	0.635705	1.23471	NA	NA	NA	1.41352	1.57453	0.668413	0.450428	0.651679	1.60136	NA	0.680856	2.54442	1.29575	NA	NA	1.27504	1.72682	1.93921	0.705203	1.71364	NA	0.821354	0.560807	NA	0.327939	0.508539
H3BS89	TMEM178B	26	1	1.02473	0.830874	1.01361	1.18731	0.871519	0.932336	1.01042	1.00343	0.819078	0.841895	0.865797	0.934714	0.840789	0.955333	0.796965	0.831935	0.954309	0.885451	0.853375	1.0613	1.04443	0.945542	0.850054	1.14705	0.823919	0.839652	0.822519	0.890929	0.812556	1.03678	0.957415	0.803097	1.04982	0.820818
H3BU51	NPTN	2	0.994	NA	1.32541	0.515807	NA	NA	1.74709	NA	NA	0.928117	1.03865	0.73871	NA	0.816007	NA	NA	NA	NA	1.21212	1.30997	2.13364	NA	0.785055	0.981201	1.06527	NA	NA	1.63146	NA	1.00219	NA	1.37088	0.889978	NA	NA
H3BVI4	LMF1	10	0.999	0.735773	1.03396	0.954898	1.07267	1.35647	0.919114	1.137	0.802532	0.971328	1.17519	1.1254	0.84964	0.947392	1.39897	0.91052	1.25649	0.676217	1.36227	0.901097	0.577115	0.88746	0.79987	0.662064	0.956991	0.63282	1.04853	0.90623	0.768723	0.697847	0.441558	0.32296	0.343249	0.638623	0.767704
H7BXI1	ESYT2	212	1	1.05562	0.895932	0.891343	1.03403	1.03612	0.982026	1.01143	1.00276	1.07234	1.04062	0.98999	1.00569	0.91936	0.940572	0.994198	1.01601	0.986227	1.21937	1.07292	1.12956	1.07422	1.11278	1.16843	1.04592	1.08696	1.0177	1.06078	1.04636	1.25242	1.21751	1.11448	1.16291	1.26689	1.26346
H7BY13	ATP2B4	12	1	2.31442	1.24093	1.65534	1.0604	1.11308	0.946282	0.881168	0.940707	0.832663	1.02713	1.18953	1.14948	1.23185	1.29966	1.02212	1.23408	0.717295	0.915322	0.812659	0.814903	1.01349	1.07881	0.845567	0.885413	0.854745	0.706191	1.01102	1.1307	1.81082	1.37618	1.23391	1.61955	1.13714	1.64073
H7BY57	NFASC	12	1	1.01405	1.00846	0.855572	0.865771	0.878737	1.17817	0.898575	0.779885	0.961173	0.88456	0.878184	0.845965	1.11884	1.25611	1.12328	1.06518	1.1058	1.21208	1.09688	1.41977	0.980201	0.985224	1.00939	1.13175	0.922038	1.17778	1.13816	1.15584	0.971245	1.09152	1.26937	0.93282	1.20054	0.982679
H7BYH4	SOD1	7	0.9993	0.185507	0.274694	0.777926	0.265635	0.915165	0.263362	0.2007	0.265521	0.264646	0.398434	0.233612	0.355977	0.197035	0.273639	0.202773	0.170726	0.205626	0.337847	0.127185	0.209168	0.175066	0.196958	0.224826	0.166948	0.301207	0.188368	0.164119	0.0871918	0.0957248	0.144826	0.124287	0.121458	0.143232	0.136131
H7BYR8	MBP	1137	1	0.508178	0.891935	0.861825	1.14925	0.987282	1.4371	1.3101	1.00865	0.840638	0.829098	1.13886	0.80334	0.65709	0.932768	0.769834	1.15095	0.754294	2.09668	1.5836	0.855635	0.951462	0.963582	1.25338	0.847117	0.608222	1.67972	0.765701	0.519095	0.532419	0.563375	0.459365	0.482313	0.471859	0.49688
H7BYX6	NCAM1	44	1	1.23305	1.15051	1.11329	1.03945	1.04825	1.07433	1.2761	0.855507	0.909367	0.904902	0.966753	0.918788	1.04873	0.884342	0.912646	1.00703	0.699632	0.903828	0.9093	1.12889	0.942041	1.03302	1.05257	0.913805	0.990711	0.958861	0.887886	0.858588	0.833229	1.06487	1.1064	1.08236	0.898468	0.846195
H7BZ56	SYNJ1	3	0.9996	NA	0.955503	NA	NA	NA	1.20122	1.55635	1.62085	NA	NA	NA	NA	0.917933	1.46718	1.4948	NA	1.5108	NA	1.06323	2.03473	NA	NA	NA	1.38825	NA	1.6767	1.22929	2.79274	NA	1.60526	1.32572	NA	NA	NA
H7BZ77	TSC22D4	31	1	0.866834	0.843775	0.861493	0.97037	1.09187	1.08309	0.897694	1.00198	0.941686	1.50112	1.1473	0.889263	1.11402	1.14154	0.982124	1.21344	0.997436	1.13088	1.1388	1.05572	1.13053	0.857106	0.936202	1.25198	1.06614	0.91729	1.07417	1.33134	1.1324	1.68563	1.2437	1.09059	1.21242	1.34723
H7C019	SUN1	1	1	NA	0.837578	NA	NA	NA	1.17319	NA	NA	NA	NA	NA	NA	0.946842	NA	NA	NA	NA	NA	1.1161	1.96541	NA	NA	NA	1.20874	NA	NA	1.08714	NA	NA	NA	1.6873	NA	NA	NA
H7C0L5	ITIH4	8	0.9987	0.821536	1.67573	0.904936	0.624699	1.11829	1.77855	1.22827	1.24241	1.1815	0.712567	1.08311	0.594189	0.603142	0.599196	1.1333	1.31889	0.779611	1.25798	1.19453	0.570034	0.551173	0.783922	0.224275	0.587825	0.462629	0.865433	0.847102	0.672152	1.12463	0.35439	0.460942	0.801164	1.12539	0.336395
H7C0S8		5	1	1.22554	0.978704	0.947961	1.11371	1.24674	0.726626	1.03334	1.27285	0.917489	1.16729	1.03037	1.11481	0.808854	1.25282	1.31324	0.995511	1.23628	1.13247	0.964394	0.999672	0.744711	1.08356	1.12415	1.03225	0.604032	1.31681	1.1463	0.872017	1.00519	1.41195	1.35359	0.966361	0.719741	0.986135
H7C132	NRCAM	2	0.999	NA	1.39993	NA	NA	NA	1.13994	1.29768	1.65418	NA	NA	NA	NA	0.458232	0.414693	1.64588	NA	1.35886	NA	1.01761	1.14686	NA	NA	NA	0.9301	NA	1.27337	1.07236	0.771194	NA	1.15194	1.0965	NA	NA	NA
H7C144	ACTN4	24	1	2.91444	1.20346	1.16375	1.15827	1.56961	1.04475	0.718259	0.855636	0.713534	0.566693	0.957143	0.834305	0.783126	0.868552	1.02369	1.44936	0.666189	0.884888	0.728881	0.649919	0.57551	0.779408	0.684144	0.595928	0.583904	0.772942	0.806404	0.711413	0.560132	0.669219	0.569993	0.361347	0.623466	0.547951
H7C1E7	BCAS1	6	0.999	0.769895	0.896548	NA	1.02307	1.0357	1.16159	0.982589	0.735368	NA	NA	NA	0.82033	0.878405	0.826898	0.946614	0.831069	1.03711	NA	1.19126	1.15677	1.2797	NA	NA	0.967591	0.968833	0.88599	0.992334	0.664714	NA	0.942965	1.29259	NA	1.08662	1.03696
H7C1H2	PSMD2	7	0.9989	1.15597	0.730021	0.983212	1.07322	0.938172	1.00533	1.04607	0.966551	1.00707	1.01417	1.02482	0.885035	0.970353	0.853262	0.757387	1.10727	0.951577	1.14677	1.13594	1.32446	1.4474	1.42821	1.43168	1.17875	1.3943	1.15171	0.997525	1.19657	1.56118	1.40314	1.41182	1.52757	2.00601	1.5569
H7C286	NAGK	8	1	1.24313	1.08265	1.1368	1.14894	0.954265	0.804302	1.09476	1.06978	0.924579	0.897228	0.826414	1.01979	1.05466	1.04516	0.910779	1.13922	1.22662	0.751564	0.823476	0.749574	0.903356	0.799929	0.557826	0.933742	1.02371	1.12255	0.796312	0.928571	0.534403	0.742627	0.696474	0.630447	0.573363	0.636191
H7C2K6	EPB41L1	12	1	0.784915	1.09648	0.871578	0.832097	1.07329	1.30837	1.03054	0.996619	0.924168	1.07362	1.05535	0.835694	0.570494	0.788373	1.57716	0.881083	0.49889	0.844354	0.937044	1.037	1.02891	1.02608	0.863955	0.990911	1.14861	0.611542	0.899028	0.937226	0.991074	0.817188	1.12216	0.939851	0.835945	1.06263
H7C2P9	ATP5PO	6	1	0.655318	0.783752	0.696147	0.761183	1.30968	1.35061	1.54175	1.34724	0.935038	0.87399	0.70694	0.635688	0.882873	0.656416	1.06523	1.25006	1.05607	1.13477	1.55777	1.54581	1.79324	1.11845	1.19173	1.14202	0.927548	0.880559	1.21114	1.25307	1.22317	1.41922	1.45715	0.751379	2.38199	1.10905
H7C333	NIPSNAP2	2	0.9974	0.791544	1.22091	NA	0.942338	0.844408	1.28742	NA	NA	NA	NA	NA	0.930353	1.20472	NA	NA	0.79013	NA	NA	1.96496	1.76859	0.945809	NA	NA	1.17726	0.951852	NA	1.8122	NA	NA	NA	1.50432	NA	NA	0.778308
H7C3I4	ADAM22	6	0.9997	1.01521	0.987113	1.03501	0.948295	0.952558	0.90469	0.973089	0.964553	1.09637	1.11582	0.930998	0.860501	1.03936	1.0527	0.972666	0.898482	0.934397	1.05057	1.06114	1.08757	0.975562	0.951527	0.913581	1.04269	1.03678	1.05134	1.03321	1.23117	1.0825	1.44529	1.41926	1.41313	1.50243	1.29643
H7C3T4	PRDX4	8	1	1.51559	1.32024	1.04682	1.17502	1.00025	1.05269	0.849839	1.02826	1.11345	1.01692	0.954199	1.11899	1.493	1.08559	0.801745	0.914807	1.04362	0.554978	0.745257	0.678384	0.694606	0.625952	0.553809	0.972031	0.818488	0.883329	0.789284	0.617462	0.429156	0.564669	0.501908	0.441932	0.41895	0.388808
H7C4T6	CADPS	5	1	2.24328	1.59968	0.964173	0.908616	0.761643	0.829993	NA	NA	0.731255	0.552715	0.715689	0.57097	1.11578	NA	NA	1.28281	NA	0.938992	0.777939	1.0053	0.466586	0.759054	0.726979	0.86065	0.415959	NA	0.971948	NA	0.728145	NA	0.746421	NA	1.10141	0.57523
H7C4U6	AGAP3	8	1	1.2847	1.26906	1.29422	0.938292	1.05438	1.06613	0.768936	0.943395	1.20641	1.18436	1.17933	1.00611	1.22831	1.35244	1.0477	1.20667	1.03665	0.806047	0.924828	0.755021	0.650643	0.563601	0.46611	0.918005	0.824786	0.69533	0.892876	0.645118	0.640305	0.711974	0.718307	0.485859	0.654683	0.769523
H7C4W0	ASIC3	7	0.9977	0.783306	0.769555	1.15343	1.43402	1.44449	1.38756	1.42852	1.34218	1.57326	1.46647	1.12505	1.06534	1.1455	0.987285	1.20688	1.021	0.845099	0.694543	0.361251	0.282547	0.489641	0.628177	0.449812	0.880485	0.807191	0.825293	0.55504	0.583071	0.37601	0.42661	NA	0.214213	0.177139	0.262941
H7C560	BRAF	78	1	1.32973	0.960732	0.962449	0.988402	1.00427	0.910991	0.883843	1.02722	1.0566	0.960994	0.97067	0.993673	0.988843	1.13172	1.14235	1.06774	1.0779	0.928711	1.02107	1.0032	0.925754	0.94029	0.977952	0.95191	0.903883	0.874641	0.967227	0.840087	1.01292	1.04732	1.04745	1.01726	1.1944	1.11892
H7C561	SF1	96	1	1.17641	1.23804	1.13862	0.952064	0.928019	0.915449	0.934671	0.997729	1.06113	1.02595	1.04115	1.10413	1.07566	1.01174	1.08128	1.04374	1.05422	0.779334	0.844885	0.72103	0.862452	0.809181	0.871218	0.91842	0.841632	1.01854	1.07631	0.850151	0.798603	0.685915	0.750022	0.756238	0.778403	0.910401
H7C5A2	EMC1	142	1	0.988308	0.947903	1.02866	1.09352	1.09359	1.11138	1.07927	1.11288	0.933565	0.908474	1.01255	0.940411	0.91475	1.04154	1.1659	1.06423	0.970242	1.1006	1.18268	1.01889	1.10554	1.15297	1.07638	1.05128	1.0466	1.01709	1.14772	1.24972	1.35836	1.11665	1.26859	1.25927	1.33836	1.19082
H7C5R6	ARID4B	1	0.998	0.66142	NA	NA	0.992944	0.903388	NA	NA	NA	NA	NA	NA	0.889756	NA	NA	NA	0.870473	NA	NA	NA	NA	1.33994	NA	NA	NA	1.00835	NA	NA	NA	NA	NA	NA	NA	1.57219	1.23987
H8Y6P7	GCOM1	18	1	0.862361	0.92302	1.04043	0.875436	1.00461	0.828357	1.28796	1.09193	1.01369	1.10167	0.982384	0.982033	0.896006	1.07859	1.42976	1.06389	0.965013	0.957861	0.989525	1.40659	0.983698	0.958613	1.00474	1.23871	0.881128	1.13107	1.14035	1.09594	1.07424	1.29276	1.7487	1.06553	0.92044	1.02622
H9KV75	ACTN1	97	1	2.20198	1.21653	1.05968	1.04115	1.12323	1.02243	0.980988	1.0231	0.923268	0.937282	1.06995	1.07701	0.854994	0.952666	1.15815	0.950479	0.756821	0.752107	0.88096	0.660456	0.81252	0.781286	0.748691	0.705837	0.75792	0.807884	0.9653	0.874444	0.789321	0.99582	0.882406	0.771116	0.795244	0.7525
I3L0H8	DDX19A	84	1	1.07536	1.00818	1.00148	0.995755	1.00371	0.932648	1.0544	0.997241	0.969054	1.08513	0.967235	0.916939	0.89964	1.20248	0.989878	1.16715	0.887766	1.00189	0.983073	1.01558	1.0179	0.969059	0.951123	1.14597	1.19413	0.999178	1.04814	1.0693	1.06953	1.14861	1.33137	1.18488	1.01604	1.06396
I3L213	PHKB	8	1	1.43566	0.993058	0.900393	1.15825	1.09026	1.00953	0.761164	0.997159	0.932928	0.901481	0.700214	1.23334	0.846999	0.887757	1.1098	1.16777	1.01598	0.920209	1.05648	0.797156	1.07063	0.830771	1.0675	0.855976	1.14183	0.781854	0.9939	0.8793	1.04689	0.953853	1.26646	0.871309	1.12767	1.50694
I3L2B2	EPN2	8	1	1.12484	0.850722	0.947946	1.04868	1.02746	0.929466	0.89095	0.886416	1.28594	1.24659	0.9063	1.01432	1.48677	1.12397	0.953131	1.08602	0.973347	1.23809	1.01267	0.616885	0.85769	0.729039	0.767016	0.849494	0.741367	0.988935	0.907747	1.02716	0.906948	1.01789	0.77064	0.942451	0.478614	0.802475
I3L3B0	C1QBP	3	0.9999	0.688349	0.757111	NA	0.778724	0.903791	0.885497	1.04411	0.912268	NA	NA	NA	0.862675	1.02192	0.996438	0.915271	0.814352	0.962214	NA	1.23528	1.35633	1.11875	NA	NA	1.41057	1.32408	1.41916	0.967147	1.55341	NA	1.50823	1.50067	NA	1.36061	1.44202
I3L3D5	PFN1	2	1	NA	NA	1.24208	NA	NA	NA	1.00088	0.662559	1.00377	1.86399	1.22642	NA	NA	0.896301	0.732751	NA	0.927073	0.865569	NA	NA	NA	1.20395	1.38223	NA	NA	0.836135	NA	1.17644	1.55113	0.840584	NA	1.57591	NA	NA
I3L3Q4	GLOD4	14	1	1.85023	1.00501	0.70575	1.41694	1.25827	0.977449	1.15027	1.00299	0.826552	0.875778	0.812228	1.29328	1.12898	1.08673	0.981488	1.31479	0.766333	1.3697	0.540112	0.693999	0.868019	1.30934	1.51132	0.932759	0.994868	0.805447	0.645325	0.880516	1.20128	0.564041	0.475487	1.43875	0.394566	0.337617
I3L492	ETF1	2	0.9978	NA	NA	1.10218	NA	NA	NA	0.965975	0.889229	1.13846	1.05437	1.18353	NA	NA	0.955088	0.945997	NA	1.04172	0.973948	NA	NA	NA	1.25276	1.21576	NA	NA	1.02937	NA	1.02286	1.09386	1.0066	NA	1.11538	NA	NA
I3L4Y1	ABR	150	1	1.37012	0.979339	1.00745	0.986458	1.05033	0.940762	0.949099	1.01079	0.96621	0.989112	0.98998	0.926726	0.990683	1.02403	1.07321	1.08103	0.937921	0.918581	0.910035	0.953774	1.02564	0.926941	0.907141	1.01146	1.039	0.976774	1.00687	0.982702	1.002	1.3103	1.28569	1.33429	1.18851	1.35802
I3L505	NDUFAB1	38	1	0.973493	1.0751	1.09625	1.09582	1.12806	1.12858	1.24411	1.07154	0.885934	0.843532	1.01727	1.14921	1.06942	1.08023	1.22216	0.969592	0.896383	1.17973	0.876133	0.864363	0.79961	1.12182	0.872215	0.845777	0.74515	0.802201	0.968365	0.826343	0.707121	0.836601	0.742318	0.615034	0.727881	0.445451
I3NI53	CRYM	7	1	0.87948	0.963067	0.970025	1.04778	0.77518	0.920786	1.18218	1.26413	0.820947	1.43295	1.36371	0.935473	0.928167	1.09831	0.971841	1.01404	0.992863	1.11523	1.06305	1.56523	1.11272	1.35256	1.39643	1.1753	0.986471	0.958361	0.843158	1.27328	1.39082	0.962905	1.11513	1.1632	0.891773	0.981038
J3KMY8	ADGRB3	9	1	0.869708	0.942022	1.0539	0.993221	0.933189	0.827368	0.929376	1.03914	0.96581	1.13029	0.893964	0.887863	0.899541	0.935129	0.930975	0.964959	0.979409	0.91065	0.957941	1.29012	0.968009	0.947331	1.21881	0.912262	1.07766	0.887181	0.953879	1.14428	0.810711	1.332	0.929648	0.587011	0.855204	1.07386
J3KMZ9	LDLR	8	0.9994	1.31869	0.87756	0.668101	1.27905	1.3459	1.14269	1.21102	0.946888	0.511532	0.809369	0.843292	1.22963	1.05688	1.04022	1.0982	1.2842	1.11813	0.989306	1.53306	1.15306	1.33138	1.43928	1.47827	0.995898	1.30209	1.09411	1.05367	1.19286	2.84585	1.28009	0.962565	0.61629	1.27034	1.07462
J3KN16	ECPAS	83	1	1.37615	0.991045	1.00841	1.12436	1.09425	1.00247	1.0585	0.962008	0.823913	0.865342	0.951114	1.00833	0.90327	0.910734	0.947096	0.981446	0.958542	1.06767	1.1135	1.04595	1.05118	0.984431	0.922847	1.05161	1.09337	1.07258	1.06404	1.02722	0.837	1.10407	1.25696	1.04741	1.16627	1.03884
J3KNE7	TPD52L1	8	1	0.608919	0.721215	0.850293	0.891352	0.850716	0.834664	0.819971	0.728882	1.12831	1.04797	0.90904	0.824562	0.945877	0.749845	0.652735	0.805875	0.83973	1.05847	0.851277	1.18546	1.05605	1.00528	1.05728	0.809481	1.07512	0.884273	0.855651	0.708346	0.893759	0.816776	0.861001	0.923817	0.967095	0.956647
J3KNG6	SPIRE1	5	0.9999	1.45747	0.920115	0.966107	1.20758	1.14241	1.01648	0.832699	1.08142	1.84105	1.45563	0.910276	0.952071	0.786102	0.728692	1.01662	0.874173	0.848127	2.19056	0.839311	1.13612	0.878042	0.845585	0.989853	0.989061	0.782035	0.541389	0.843069	0.639943	0.813887	1.32786	1.32828	1.15876	1.25532	1.17149
J3KNV4	ITGA7	169	1	0.871226	0.859541	0.838023	0.955508	0.962125	1.11093	0.894164	0.991305	1.11002	0.999502	0.90336	0.947147	0.947462	0.80952	0.802681	0.826238	1.22643	1.0407	1.17801	1.21627	1.08142	1.06836	1.05613	1.04578	1.57168	1.23204	1.15927	1.11348	1.12878	1.09401	1.11672	1.24422	1.0997	1.05247
J3KQA0	SYT1	16	1	2.23502	1.22088	1.68879	1.27515	0.9955	0.660483	1.50945	1.1307	0.840425	0.519084	0.528363	1.12616	0.528457	0.941951	1.12191	1.55306	0.404656	1.21654	0.479797	0.567933	0.874166	0.335402	0.783852	0.392363	0.758262	0.496368	0.534395	0.975284	0.732057	0.38351	0.746103	0.938745	0.823321	0.729202
J3KQN4	RPL36A	48	1	0.784728	1.10909	0.824378	1.1248	0.93217	1.0055	0.832402	0.919968	1.5117	1.12442	1.04183	1.15639	1.34792	1.19551	0.985453	0.698095	1.47307	0.705864	1.36487	0.567096	0.644956	0.453418	0.699271	0.773533	0.525102	0.822091	1.25645	0.643266	0.513773	0.583772	0.762525	0.840156	0.760614	0.918907
J3KRM4	AQP4	1	1	NA	1.23332	NA	NA	NA	1.16032	NA	NA	NA	NA	NA	NA	1.16887	NA	NA	NA	NA	NA	1.53113	1.37667	NA	NA	NA	1.25357	NA	NA	1.30431	NA	NA	NA	2.05166	NA	NA	NA
J3KS16	AKAIN1	10	1	0.849923	0.98985	1.41598	0.937645	0.652161	0.677575	0.981645	1.41807	1.1128	1.61095	1.01884	0.986009	1.79453	0.885245	1.0022	0.998566	1.49286	0.428629	0.844185	0.53391	1.06296	1.06539	0.987091	1.03036	0.608364	1.22487	1.62698	0.842223	0.809277	0.403585	0.460959	0.411941	0.383758	0.423655
J3KS73	TK2	5	0.9923	0.674887	NA	0.678002	1.14365	0.787678	NA	1.17348	1.1627	0.970145	1.11093	0.814269	0.996969	NA	0.910658	0.862837	0.914061	1.24977	1.31235	NA	NA	1.06607	1.283	1.49407	NA	1.16021	1.16742	NA	1.4061	1.2812	1.47547	NA	1.53645	1.40368	1.36628
J3KSC4	RAC3	38	1	0.999532	1.04735	0.995701	1.00374	1.0296	0.961765	1.1071	0.969458	0.962624	0.778225	0.89502	1.04703	1.16762	0.916341	0.96606	1.08484	0.950416	0.959102	1.00923	0.884711	0.771975	0.868466	0.789386	0.946578	1.12301	0.843545	0.93081	0.780876	0.825705	0.746835	0.948094	0.868085	0.81598	0.828895
J3KSH8	JPT1	4	1	NA	1.04977	0.976997	NA	NA	1.0456	NA	NA	0.95805	0.973354	1.08405	NA	1.01232	NA	NA	NA	NA	1.04783	1.18107	1.25151	NA	1.11899	1.12246	1.19092	NA	NA	0.953896	NA	1.19205	NA	1.13254	1.01597	NA	NA
J3KSS5	CORO6	29	1	1.26375	1.04065	1.00462	0.826865	0.84857	0.986498	0.980386	0.982983	0.961904	1.098	0.919647	1.10194	1.29734	1.08786	1.0096	1.09396	0.859782	1.35978	0.792948	1.03852	0.717614	1.00637	1.17236	0.821535	0.831372	0.917604	0.990227	0.776491	1.20377	1.12509	0.848844	1.25926	1.13892	1.07752
J3KSZ7	SEPTIN4	44	1	1.84623	1.10858	1.38397	1.22436	1.30204	1.21881	0.924721	1.00943	0.996622	0.977688	1.15357	0.90468	0.775731	1.17973	1.14602	1.13875	0.751005	0.855139	0.666659	0.664043	0.645817	0.741632	0.639808	0.685281	0.911706	0.8262	0.91468	0.643733	0.994372	1.01427	0.677967	0.516881	0.888396	0.727879
J3KTA2		53	1	0.938069	1.12127	0.749441	0.917382	0.982673	0.85136	0.759034	1.06009	1.21939	0.99963	1.20504	1.31536	1.24027	1.19233	0.892498	0.805608	1.47005	0.768044	0.870568	0.791877	0.878792	1.02695	0.908756	1.21477	1.03709	0.882203	0.953735	1.18782	0.875944	0.771693	0.669852	0.616582	0.785297	0.77144
J3KTD8	CBFB	7	1	0.923874	0.95562	0.980606	0.78751	0.877223	1.12552	0.810832	0.968502	1.08791	1.16443	1.08263	0.903447	1.00232	1.19767	0.855699	1.04433	1.01156	1.22654	1.04443	1.24718	1.09645	1.12635	1.07521	1.10302	0.931576	1.00059	0.984383	1.06988	1.10113	1.09352	1.21245	1.26933	1.17392	1.16885
J3KTL2	SRSF1	165	1	0.556734	1.02606	0.799972	0.744366	0.771688	1.0412	1.11804	0.63775	1.62271	1.27429	1.27437	1.23663	1.02722	1.36329	1.17923	0.967181	1.06754	1.06452	1.19341	0.997996	0.712541	0.76654	0.800221	0.911915	0.74447	0.652445	0.868293	0.614488	0.811751	0.74826	0.865986	1.02431	1.09161	0.952129
J3QKL5	MBP	38	1	0.770514	0.932025	0.888605	1.21789	1.56554	1.12336	1.5965	0.787515	0.988245	1.07654	0.938517	0.759824	0.821858	1.00924	0.684454	1.28665	0.660091	1.57243	1.19192	0.880329	0.917941	0.942709	1.06714	1.14764	0.782649	0.988868	0.7162	0.691459	0.786657	0.621124	0.362054	0.690955	0.730114	0.376392
J3QKP5	ALDOC	8	0.9999	1.06636	0.916841	1.02734	1.25041	1.09743	1.01542	1.17269	0.981993	0.958068	0.951208	0.820719	0.945881	1.05789	0.961262	0.893907	0.945343	1.0026	0.972422	0.92413	1.36634	1.16778	1.19992	1.19707	1.04955	0.986792	1.22041	0.902699	1.21123	1.05568	1.30124	1.04247	1.3045	1.2548	0.962385
J3QLA8	SEPTIN4	2	0.9986	NA	0.926238	NA	NA	NA	1.38838	NA	NA	NA	NA	NA	NA	1.41526	NA	NA	NA	NA	NA	1.52091	1.59537	NA	NA	NA	1.02991	NA	NA	1.07691	NA	NA	NA	1.21562	NA	NA	NA
J3QQJ0	SAP30BP	18	1	0.892356	1.00524	0.891964	0.943358	0.8912	1.05417	0.990789	1.05783	0.855642	0.958678	0.890371	1.04492	0.908758	0.988116	0.92703	0.985585	0.848426	0.985433	0.956853	1.15984	1.05712	0.898293	1.01227	1.02882	0.946289	0.869655	0.954127	0.859065	1.19416	1.15174	1.38679	0.976394	0.997089	0.873216
J3QQY7	TANC2	8	1	1.09035	0.911163	0.873625	0.908556	0.790969	0.899122	1.03489	0.98874	0.736752	1.06807	0.667692	1.13388	0.92759	0.869647	1.08542	1.08035	1.2913	0.774208	1.00108	0.949656	1.12323	0.721994	0.990817	1.01952	1.06458	1.06021	0.89765	1.08497	0.737137	0.765229	1.01329	1.03625	0.5665	1.02857
J3QRA8	CNDP2	2	0.9936	NA	NA	0.985767	NA	NA	NA	0.863797	1.00582	0.758791	1.07872	1.03757	NA	NA	0.820933	0.752543	NA	1.06374	1.38581	NA	NA	NA	1.65372	1.31796	NA	NA	1.48542	NA	1.39838	1.15985	1.18095	NA	1.20604	NA	NA
J3QRS3	MYL12A	259	1	0.862568	1.0006	0.948605	0.936414	0.96235	0.997975	1.06261	1.17554	1.07326	1.13719	0.967051	0.938052	0.967239	0.99535	1.02147	0.927485	1.00422	0.98831	0.867466	0.881004	1	1.05003	0.932802	0.943247	0.992496	0.916085	1.13998	1.01869	1.32181	0.867632	0.808364	0.741851	0.84136	0.910535
J3QRU1	YES1	22	0.9998	0.93145	1.0221	0.946618	1.04309	0.931826	1.055	0.809756	1.00621	1.00163	1.00961	1.09595	0.861811	0.921962	0.923374	0.907777	0.941028	1.06297	1.30789	1.03407	1.05928	1.13676	1.09413	1.09073	1.03629	1.44288	0.953063	1.2067	0.990903	1.61205	1.30778	2.27689	1.96289	1.5781	2.65897
J3QSF7	MPO	1	0.9996	NA	NA	NA	NA	NA	NA	1.21839	1.15001	NA	NA	NA	NA	NA	1.04694	0.956043	NA	1.10974	NA	NA	NA	NA	NA	NA	NA	NA	1.32691	NA	1.3464	NA	1.64304	NA	NA	NA	NA
J3QT29	COPS9	3	1	NA	0.94547	0.849093	NA	NA	1.12165	0.907853	0.822604	0.818092	0.819889	1.08201	NA	1.03277	0.916584	0.931846	NA	0.998358	1.17776	1.11311	1.55626	NA	1.12856	1.34426	1.16149	NA	1.12023	1.0442	1.2034	1.43425	1.02969	1.50024	1.3184	NA	NA
J3QW43	MPDU1	14	1	0.883255	0.5859	0.907138	1.05349	1.09368	0.775729	1.28036	1.48941	0.924718	1.17949	0.998074	1.06497	0.874822	0.585806	1.05742	0.906172	0.772127	1.26079	1.13036	1.37777	1.54658	1.09521	1.21178	1.7281	1.41336	0.84446	1.07488	1.21131	1.18257	0.863973	1.34934	1.32992	1.31336	1.02122
K4DIB6	SLC25A22	6	0.9962	0.59798	0.667978	1.24298	0.789012	0.574699	1.11096	0.947914	1.45545	1.71975	1.11479	1.20784	1.27469	1.592	1.1662	0.859068	0.70747	1.14177	1.00801	1.23839	1.49352	1.42602	1.81771	1.21111	1.87838	0.993599	0.938184	1.38827	1.45437	0.669377	0.880507	0.707884	1.14044	0.673294	0.709984
K7EJ83	CDK3	5	0.9984	0.744913	1.04959	0.717345	1.06165	0.852079	1.28203	1.12933	1.02684	0.558911	1.08089	0.791099	1.04099	0.961472	1.55604	1.10974	0.933945	1.04739	1.23834	1.16399	0.990973	0.859044	1.06961	0.988669	1.30972	0.954657	1.33924	1.10836	1.06228	1.43672	1.35524	1.1999	1.07209	1.30227	1.23391
K7EJB5	SNRPD2	8	0.9966	0.643935	0.925197	0.80008	0.946634	0.86031	1.11901	0.956347	1.11918	1.98287	1.66454	1.169	1.13774	1.13499	0.950665	0.796247	0.816198	1.21294	1.02259	1.01237	1.61333	0.986997	0.908898	1.19798	1.34706	1.27802	0.852264	1.07247	1.06978	0.682284	0.870943	0.77994	0.804817	0.810051	0.777105
K7EJK1	GFAP	7	1	0.497698	1.12031	1.01366	0.726665	0.712692	1.48686	0.891656	0.854641	0.722791	1.07517	1.1278	0.675179	1.1262	0.872424	1.13828	0.980825	1.29369	1.194	2.03637	1.64083	1.15141	1.21195	1.22328	1.58834	1.27112	1.10252	1.42418	1.44426	1.62969	1.06553	2.1597	1.63339	1.05306	1.6297
K7EJP7	HDGFL2	6	0.9999	0.844197	0.83951	1.17292	0.998105	0.973851	1.10234	0.717782	1.26042	1.07699	1.10595	1.09735	0.750872	1.06353	0.651702	0.948387	1.21651	1.13001	1.26181	1.08463	1.30952	1.39823	1.81185	1.79617	1.20626	1.61306	1.10697	1.18017	1.3547	0.868256	0.774956	1.14905	0.738438	0.721544	0.60942
K7EJU1	GFAP	3	0.9991	1.03395	1.06198	1.31445	1.26154	1.01751	0.827553	NA	NA	0.929762	0.80224	0.888948	0.778031	0.829941	NA	NA	0.963865	NA	1.3543	1.54833	0.869251	0.822493	1.11765	0.971029	0.77888	0.966933	NA	0.813883	NA	1.03556	NA	1.01683	0.990077	0.572133	1.60445
K7EJU9	JMJD6	12	1	0.916111	1.16006	1.07972	1.03375	1.00371	1.40509	1.04773	0.915035	0.916893	0.804353	0.893731	0.89086	0.915505	1.01022	0.960233	1.20247	0.930493	1.01916	1.65071	0.967071	1.13288	1.01787	0.935423	1.92116	1.16521	1.12516	1.27498	1.11014	1.19623	1.04783	1.1462	1.12186	1.47484	1.50725
K7EK18	SEPTIN9	7	0.9999	0.892436	1.20487	1.06357	1.14053	0.804112	1.01807	1.14965	1.03178	0.880983	0.829132	1.00017	0.83553	0.932083	1.0926	1.12945	0.838266	1.07451	1.09511	1.1432	1.2263	1.12112	1.1119	1.14256	0.952559	1.208	1.55068	1.06752	1.16275	0.748663	1.45356	1.32272	1.0724	1.73645	1.5332
K7EK57	WIPI1	5	1	1.15449	0.826151	1.23975	1.12919	0.826665	0.876448	NA	NA	1.06898	1.11828	1.05333	1.10751	0.773607	NA	NA	0.88708	NA	1.20627	0.831511	1.12293	1.21375	1.33049	1.22285	0.986731	1.20524	NA	0.963401	NA	1.39381	NA	1.12994	1.31098	1.32114	1.17459
K7EK60	FMNL1	12	1	0.933647	0.77984	0.971959	0.895647	1.02158	0.74857	1.2464	0.967131	0.871408	1.47922	0.887347	0.64272	0.818623	1.05825	1.01689	1.64051	0.776185	2.29196	0.705246	1.31561	1.6473	1.32589	1.02088	1.38409	1.36773	1.24908	1.25795	1.28722	1.84918	1.0416	1.50881	1.11986	2.44594	2.18907
K7EK77	ATP5F1A	8	0.9927	0.940812	0.870462	1.25647	0.970828	1.22975	0.961904	1.21021	1.18187	1.03943	0.882847	1.06394	0.765223	1.13505	0.800711	0.972242	1.11028	0.787197	1.05735	0.886103	1.64939	1.09159	1.57721	1.2876	1.40583	1.18187	0.921139	0.947562	1.08204	0.583437	0.429565	0.372006	0.567024	0.730574	0.552969
K7EKD1	GFAP	64	1	1.24509	0.873742	0.793428	1.02966	0.849378	0.701943	0.778584	1.04692	0.765369	0.962767	1.0007	1.01738	0.756868	0.728143	0.690152	1.01514	1.49058	0.723742	0.972811	0.967003	0.9853	0.939759	0.877799	1.00334	2.00563	1.37288	1.12244	0.86841	0.807248	0.923873	0.874509	0.699538	0.870587	0.817532
K7EKE6	LONP1	154	1	1.12541	0.899278	0.901907	0.986734	1.00971	1.03901	0.974185	0.978052	0.894836	0.985186	1.00943	0.867752	0.91347	1.07206	1.0372	1.1345	0.960998	1.19715	1.06275	1.1123	1.09161	1.11531	1.06153	1.06173	1.08352	1.1112	1.11896	1.15844	1.31377	1.49535	1.61741	1.37007	1.48397	1.46117
K7EKN2	ENO3	7	0.9994	1.05518	1.0808	1.00282	1.08467	0.988165	1.19912	0.939666	1.00392	1.19236	1.07079	1.22648	0.959907	1.02835	0.909171	0.966196	0.898054	1.1199	1.24452	1.10997	1.26712	1.22384	1.2454	0.947854	1.02969	1.42752	1.07776	1.05942	0.984467	0.91273	1.10611	1.28664	1.08693	1.40477	1.41534
K7EL16	HSPBP1	4	1	0.924279	NA	0.774912	0.964265	0.599702	NA	0.882659	0.926193	0.669567	1.02509	1.21889	0.831104	NA	0.763026	1.03493	0.721641	0.981656	1.0259	NA	NA	0.634308	0.465425	1.26457	NA	1.0088	0.880153	NA	0.839673	0.94461	1.04484	NA	1.5263	1.05199	1.35018
K7EL81	PPP1R12C	14	1	0.844423	0.948202	0.987653	0.549557	0.963303	0.872748	1.07551	0.917598	0.986634	1.01592	1.11392	0.863789	1.08559	0.944444	1.28125	0.88646	1.1329	1.03575	0.90193	0.951638	0.974408	1.09036	0.730702	0.771938	0.739388	1.23615	0.962532	1.02082	1.10871	1.15389	0.918563	1.37605	0.973386	0.871482
K7ELB4	PRELID3A	8	1	0.77608	0.947884	1.03736	1.11059	0.907478	1.07003	0.915953	0.891561	1.11721	1.24411	1.1604	1.04281	1.03735	0.978315	0.966631	0.862657	1.10974	1.26733	1.22453	1.55989	1.32066	1.04616	1.17673	1.17768	1.14796	1.12101	1.11456	1.30642	1.05992	1.33689	1.40719	1.04792	1.35413	1.19381
K7ELH8	DPY19L3	8	0.9995	0.747723	0.720245	0.987893	1.02317	0.96289	0.930173	1.10204	1.22422	1.11016	0.990907	0.818885	0.953447	1.12458	0.937282	1.14599	0.68312	0.935007	0.978283	1.43979	1.2999	1.22415	1.03977	1.17874	1.48657	1.12366	1.37334	1.39417	1.65768	0.800761	1.60318	1.53818	1.46633	1.0047	0.965098
K7ELL7	PRKCSH	211	1	1.60226	1.05623	1.17647	1.00468	0.848201	0.781008	1.00091	0.931073	0.867206	0.771101	0.833941	0.976147	1.24067	1.20425	0.889735	1.2072	1.04577	0.997453	0.785629	0.677044	0.977427	1.09041	0.847863	0.968942	0.943307	1.22315	1.06798	1.10083	0.710364	0.715829	0.784302	0.56541	0.661139	0.628014
K7ELP4	GFAP	1	0.9982	NA	NA	NA	NA	NA	NA	0.941937	0.915316	NA	NA	NA	NA	NA	0.93165	1.10247	NA	1.12267	NA	NA	NA	NA	NA	NA	NA	NA	1.12807	NA	1.12488	NA	1.30232	NA	NA	NA	NA
K7EM38	ACTG1	106	1	1.36248	1.17706	1.19738	1.12509	1.0839	0.957166	1.11018	1.03513	1.02091	0.938821	1.08198	1.05038	1.11819	1.11457	1.06638	1.15146	0.853759	0.543229	0.579968	0.548575	0.656805	0.720112	0.633548	0.954959	0.650115	0.945843	0.76742	0.770398	0.494026	0.496849	0.391165	0.397626	0.434066	0.290267
K7EMB0	TMEM235	5	1	1.00594	0.600649	0.80431	0.975206	0.935677	0.98161	0.938691	1.07813	1.05051	1.21855	1.34066	1.08014	0.876181	1.20034	0.964906	0.939352	1.04538	0.866008	1.00856	1.20052	1.35655	0.91504	0.935265	1.06885	1.13167	1.19367	0.949792	1.17322	0.865111	1.15715	1.28057	0.896735	1.04881	1.21052
K7EMD9	KRT13	2	0.9944	NA	0.478346	NA	NA	NA	0.658436	0.938061	0.655119	NA	NA	NA	NA	0.471543	0.801329	0.403938	NA	0.857043	NA	0.884355	1.26622	NA	NA	NA	0.807794	NA	0.630253	0.538799	1.26514	NA	0.720398	0.772793	NA	NA	NA
K7EMS3	KRT19	1	0.9951	NA	0.76533	NA	NA	NA	1.12454	NA	NA	NA	NA	NA	NA	0.980145	NA	NA	NA	NA	NA	1.26924	1.81216	NA	NA	NA	1.43239	NA	NA	1.23701	NA	NA	NA	1.8142	NA	NA	NA
K7EN31	RANBP3	20	1	1.09583	0.895976	0.682835	0.908563	0.947128	0.82344	0.919325	0.929119	0.833577	0.913706	1.07966	0.902604	1.1118	1.10891	0.921847	1.08511	0.994536	0.945035	0.993078	1.36507	1.26731	1.03289	1.19673	1.05805	0.943328	0.954922	0.911468	0.952937	0.783502	0.629971	1.22727	0.838124	1.20103	1.1379
K7EN66	CNP	11	1	0.925592	0.812386	0.752991	0.936824	1.00236	1.01463	0.830176	0.895179	1.07918	0.999101	1.1306	1.33551	0.84321	0.727741	0.828357	0.823134	0.935476	1.61462	1.27848	1.18991	1.02154	1.07274	1.6107	0.883365	1.39635	1.23222	0.98615	0.912112	0.954744	0.899292	0.923878	0.972302	0.854289	1.44096
K7ENE3	VPS25	7	1	0.994751	0.952875	1.10187	1.06565	1.12245	0.868788	1.18129	1.1545	0.945972	0.908326	0.948947	1.21313	0.939867	0.944704	0.994728	1.11096	1.15192	1.2264	1.08691	1.19736	1.26709	1.42146	1.26904	1.1325	1.14283	1.19717	0.981413	1.22558	0.963861	1.0123	1.05713	0.996563	0.916913	1.11085
K7ENE8	FXYD7	7	0.9999	1.62938	1.50662	1.59819	1.11509	1.42323	1.14574	0.919698	0.897442	1.32703	1.07744	0.810798	1.27342	1.07889	0.77999	0.70873	0.974532	0.59892	0.694391	0.434803	0.678633	0.561696	0.757788	0.544684	0.935064	0.543344	0.47624	0.559223	0.618951	0.489345	0.682511	0.392216	0.642701	0.408918	0.338268
K7ENF0	NARS1	4	1	1.41603	1.12558	0.951738	1.09116	1.08877	1.08382	NA	NA	0.91019	0.956816	0.981664	0.983857	0.992653	NA	NA	1.04715	NA	1.05203	1.08889	0.917127	0.986255	0.896473	0.991689	0.984431	1.14355	NA	1.13637	NA	1.07982	NA	1.07383	1.07231	0.957739	1.05888
K7EP41	GPI	5	0.9999	NA	1.48811	1.07465	NA	NA	1.38464	1.01979	1.26187	1.32003	1.46806	1.40591	NA	1.07899	0.935299	1.11377	NA	0.643604	1.51424	1.12508	1.82903	NA	1.77963	1.46814	1.21694	NA	1.69345	1.25164	1.13534	1.92724	1.24629	1.23415	NA	NA	NA
K7EPS4	MXRA7	8	1	0.882074	0.843407	0.897313	0.776311	0.816911	0.855692	0.571037	0.735333	0.867283	0.826572	1.05835	0.996826	1.28542	1.01285	0.858425	0.806546	0.740788	1.10759	1.27522	1.06266	0.977753	1.37252	0.8191	1.25686	1.21377	0.918289	1.25682	1.22639	0.94199	0.670638	0.824045	0.891462	1.11271	0.726202
K7EPU5	SPRED3	8	1	1.32716	1.05279	0.937513	0.977829	1.06958	0.963692	0.90761	0.935782	0.981731	1.03456	1.1335	0.990773	1.13718	0.96553	1.02518	0.928219	0.917158	1.18823	1.14828	0.952308	0.875921	1.00022	1.08243	1.07683	0.965526	0.930501	1.09372	1.0568	0.998328	1.00965	1.00003	0.816182	0.894902	0.981446
K7EQD6	NSF	486	1	1.78549	1.02591	1.00973	1.18717	1.15238	1.00203	0.894376	0.953444	0.99802	1.00975	0.950924	0.802115	1.00686	0.977939	1.13165	1.05883	0.912959	1.05019	0.87995	0.906786	0.834768	0.777067	0.887596	0.860734	0.893976	0.899079	0.953659	0.732914	1.04779	1.29651	1.34289	1.30713	1.07635	1.27829
K7EQM7	SLC14A1	1	0.9999	NA	NA	NA	NA	NA	NA	1.62826	2.20537	NA	NA	NA	NA	NA	2.03952	1.24082	NA	0.83236	NA	NA	NA	NA	NA	NA	NA	NA	0.843851	NA	1.5641	NA	1.20133	NA	NA	NA	NA
K7ER90	EIF3G	5	1	0.821252	0.865634	0.805256	0.984614	0.707451	0.749438	0.787632	1.17671	0.919219	1.2789	0.980083	2.15313	1.09872	1.10955	0.865184	0.871518	1.38656	0.79294	0.734933	0.81538	1.34471	0.836469	1.02553	0.856309	0.953787	1.03404	1.05577	1.45412	1.19764	0.817596	0.93556	1.03641	0.887339	1.23844
K7ERD8	MAPRE2	16	1	1.0088	0.843975	0.808378	1.16277	0.976923	0.951947	0.981835	1.09807	0.967111	0.825642	1.10701	1.00259	0.96968	0.957986	0.82872	1.01838	1.04462	1.07477	1.03282	1.41281	1.48431	1.29579	1.3048	1.16219	1.31476	1.17565	1.08248	1.51896	1.27267	1.2867	1.34113	1.28824	1.27206	1.44006
K7ES00	H3-3B	11	1	0.650289	0.692238	0.890271	1.02191	0.875215	1.08264	0.942578	0.792424	0.914916	0.89304	1.02282	0.910979	0.867591	0.671725	0.687296	0.958065	0.932614	1.33844	0.990591	2.51169	1.16442	1.53735	1.78825	1.11529	1.27302	1.01133	0.723679	1.05709	1.15774	1.26117	1.36185	1.39413	1.80846	1.06792
K7ES11	UBE2O	8	1	2.02426	1.22593	1.44696	1.01305	0.775515	0.608343	0.774519	0.770916	1.23733	0.866391	1.14319	1.49177	1.45276	1.02785	0.899151	1.42899	1.04181	1.2494	0.92492	0.588109	1.0563	0.997621	1.0076	0.834655	0.899212	1.09347	0.911743	0.958475	0.882614	0.84771	0.657504	1.00504	0.654033	0.866365
K7ES57	MFSD11	6	0.9998	1.05742	1.15393	1.17528	1.23559	0.971797	1.21215	1.41467	1.08129	0.877375	0.862922	0.998153	1.5732	1.02435	1.07969	1.09217	1.09462	0.888694	0.864855	1.03657	0.804236	0.978175	1.02983	0.987038	1.08121	0.928375	1.0031	1.17792	0.917928	0.829489	0.953411	0.955649	1.19543	0.70564	0.981051
K7ES63	TUBB6	7	0.9998	0.773653	0.916348	0.993846	0.937422	0.930331	0.993352	1.14061	1.065	0.86274	1.00969	1.15457	0.920594	1.02794	1.27536	1.05529	0.935299	1.22553	0.955907	1.08483	0.983732	1.28868	1.53684	1.37955	1.1385	1.10444	1.30871	0.885995	1.42619	1.47824	1.21299	1.04883	1.50683	1.24853	1.21847
K7ES70	MFAP4	27	1	0.462804	0.924281	0.316942	0.53226	0.642504	0.570075	0.764633	3.59941	1.39964	0.798231	0.487661	0.6334	0.564225	0.983199	0.641259	0.646706	0.710594	0.774053	0.621897	0.611704	2.68369	1.08478	1.69042	0.671984	1.60323	1.03236	3.96771	1.65518	2.98218	0.645735	0.481543	0.757419	0.730775	1.438
K7ESF5	SLC44A2	4	0.9962	1.82273	NA	1.17884	1.33514	1.05173	NA	1.14242	0.979443	0.684358	0.678209	0.883927	1.45341	NA	0.720537	1.01635	0.999069	0.937935	0.586041	NA	NA	0.599873	0.643625	0.674367	NA	0.857077	0.889855	NA	0.704525	0.557669	0.57392	NA	0.786358	0.560449	0.5211
K7ESM5	TUBB6	7	1	0.707729	0.87787	0.774606	1.01824	0.930602	1.00857	0.916646	0.944434	0.692942	0.81817	0.80691	1.02249	0.957382	1.02791	0.979191	0.853755	1.00801	0.820402	1.12795	0.905889	1.09838	1.05224	0.818268	0.941051	1.19003	1.2078	0.947066	0.990851	0.835441	1.29824	1.10388	0.685862	0.950776	1.17961
K7ESP7	SLC44A2	24	1	1.08281	1.13788	1.05194	1.01949	1.03621	0.90235	1.30606	1.04597	0.856877	0.914663	0.926497	1.03543	1.12695	0.929066	0.925262	0.895957	0.846539	0.829115	1.18224	0.855493	0.905604	0.975221	1.03594	0.995928	0.720988	0.93331	0.901455	0.957093	0.949657	1.00961	1.31335	1.22364	0.840874	1.03282
L0R6Q1	SLC35A4	44	1	0.819738	1.03671	1.05703	0.98538	0.989298	1.02634	1.21545	1.26466	0.86845	1.01776	0.877434	0.940356	0.942982	0.935516	1.01732	1.09664	0.947902	1.08542	0.963267	1.08885	1.09114	1.13662	1.06663	0.943305	1.07582	1.077	1.08551	1.09022	0.798403	0.91862	0.904185	0.755292	0.750171	0.791911
L0R819	ASDURF	20	1	0.896598	0.940047	1.13808	0.820393	1.16245	0.963146	0.839192	1.02695	1.1612	1.48678	0.92916	0.998452	1.08351	0.899857	0.844143	0.908912	0.991166	1.02312	1.03506	1.34469	1.27518	1.2712	1.02466	1.20639	1.29994	1.0115	1.119	0.983328	1.05566	0.945503	0.943525	1.25964	1.40921	1.09752
L0R8F8	MIEF1	18	1	0.751027	0.793476	0.858371	0.890932	0.831777	0.74692	0.800837	0.818555	1.06011	1.19554	1.11927	1.08006	1.03092	0.971962	0.831033	0.847797	1.33278	1.32877	1.10548	1.2902	1.28761	1.30084	1.5067	1.31646	1.07895	1.13821	1.17518	1.48023	1.67891	1.40471	1.31161	1.6412	1.93167	1.86506
M0QX14	TUBB4A	16	1	0.703817	0.939217	1.0479	1.40259	0.953355	1.01679	1.07498	1.33256	1.70328	1.36502	1.22319	1.25246	1.01823	1.12614	0.869271	0.801146	1.37933	1.03098	0.868225	0.680452	0.610219	0.48766	0.658606	0.998611	0.534829	0.918812	0.756084	0.890403	0.555094	0.49152	0.499633	0.448577	0.307904	0.806761
M0QY37	TUBB4A	12	1	0.855881	1.55798	1.64059	1.36054	1.2397	1.03731	1.1499	1.09	1.09929	1.39505	1.65522	1.52854	0.545649	0.79996	0.818053	1.43729	0.526667	1.31085	0.804084	0.913268	0.95597	0.780678	1.23322	0.687802	0.725642	0.599293	0.352998	0.485603	1.18322	0.780963	0.744622	1.02084	0.447419	0.9981
M0QY43	MYH14	3	0.9962	NA	0.856173	1.32831	NA	NA	1.0287	1.16892	1.31672	1.08392	1.17498	1.14978	NA	1.0711	1.2442	1.01276	NA	0.873435	1.10626	1.38867	1.34501	NA	1.26114	1.13684	1.16803	NA	1.12335	0.92184	1.04721	0.866184	0.770026	1.69863	1.84682	NA	NA
M0QYM7	TUBB4A	12	1	1.26718	0.894169	1.05665	1.0022	1.0263	0.964246	0.842015	0.989661	0.955932	0.797538	0.897704	1.30315	0.934069	0.741095	0.940819	0.975942	1.37726	1.49954	0.779633	0.682155	0.708344	0.910521	0.866198	0.874947	0.793004	1.33531	0.895285	0.890636	0.777305	0.663367	0.388274	0.725313	0.536534	0.620905
M0QYZ1	MAN2B1	6	1	0.510665	0.815262	0.932005	1.0436	1.01134	0.725456	1.9073	0.858077	0.946025	1.19338	1.15857	0.913689	1.36575	0.97063	1.01854	0.97728	1.43866	0.996729	1.35534	0.755857	1.342	1.45461	1.67578	1.02554	1.02243	1.82704	1.19831	2.16019	0.681376	0.659583	0.452247	0.499474	0.239313	0.43951
M0QZ21	AP2S1	8	1	0.803606	0.793592	0.785462	0.991091	0.671091	0.807779	0.807545	1.28499	2.04219	1.6952	1.21508	1.2202	1.51954	0.913812	0.698925	0.682296	1.52417	0.941234	1.19512	2.22709	1.58371	1.33454	1.36428	2.18556	1.22381	0.789711	1.22934	1.58052	0.607617	0.73108	0.782715	0.591938	0.649205	0.646061
M0R019	HNRNPM	5	1	NA	0.830936	0.963093	NA	NA	0.759705	0.617552	0.841945	0.799959	0.908919	0.926506	NA	0.942243	0.8637	1.27755	NA	1.1271	0.953544	1.09855	0.834191	NA	0.995172	0.920278	0.812797	NA	1.13009	1.18751	0.744488	0.885725	0.785292	2.04702	1.16462	NA	NA
M0R080	DNAJB1	8	0.9997	1.06535	1.25389	1.01502	0.854613	0.884401	0.879275	1.41767	1.18678	1.11078	1.13155	0.954061	1.03469	1.14177	0.978883	1.03022	1.10625	1.14157	1.0077	1.10029	1.20976	0.901109	1.12093	1.01	1.2863	0.963023	0.958228	1.22768	0.996672	0.610855	0.556721	0.791073	0.552519	0.515493	0.467183
M0R0N0	NDUFA7	3	0.9957	0.531013	0.851231	0.983317	0.944114	1.00154	0.988244	NA	NA	1.39106	1.24746	1.10211	0.980845	1.03295	NA	NA	0.935297	NA	1.27852	0.73221	1.28031	0.899955	0.773227	0.835539	1.34764	0.989391	NA	0.947596	NA	0.497527	NA	0.551864	0.83002	1.13107	0.869682
M0R0Q5	ZNF414	4	1	0.981766	1.00632	NA	1.88484	0.899718	1.8168	1.13593	1.30985	NA	NA	NA	1.48898	1.01435	1.02116	0.915008	1.02043	0.793331	NA	2.11914	2.12653	4.11654	NA	NA	2.00488	3.06357	0.988721	1.76162	1.61985	NA	1.69405	3.43424	NA	5.45731	3.13892
M0R0X0	TUBB4A	6	1	0.34424	1.08798	0.686234	0.654066	0.555145	0.541796	1.11592	0.903749	0.986063	0.710555	1.22315	1.16475	1.09272	1.49782	1.59164	0.649456	0.791288	1.17786	1.79362	0.837127	0.628475	0.667438	0.402791	0.698976	0.515501	1.03718	1.02741	0.897306	1.19349	0.989595	0.784291	0.509943	1.17503	1.32235
M0R1N9	SIRT6	3	0.9999	1.16082	NA	1.25716	1.22472	1.1815	NA	1.02732	0.995926	1.1619	1.18912	1.01986	1.00954	NA	0.729043	0.852883	1.43656	0.801074	1.78983	NA	NA	1.37636	1.53317	1.58275	NA	1.15907	0.968375	NA	1.40351	1.40627	1.75097	NA	1.25837	1.0953	1.42212
M0R213	NAPA	1	0.9989	1.18801	NA	NA	1.17983	1.04014	NA	NA	NA	NA	NA	NA	1.43996	NA	NA	NA	1.02689	NA	NA	NA	NA	1.58477	NA	NA	NA	1.22405	NA	NA	NA	NA	NA	NA	NA	1.6164	1.91329
M0R2D3	TUBB4A	8	0.9979	1.54848	1.46575	0.953808	0.842509	1.09799	0.838916	0.865155	0.865847	1.06354	1.07139	1.04314	1.0347	0.98239	1.18474	1.39661	1.32164	0.936673	0.954639	1.10428	0.421811	0.489669	0.314416	0.381965	0.626233	0.581382	0.635136	0.986974	0.399163	0.414998	0.700696	0.562458	0.471294	0.341563	0.593391
M0R2K6	SH3GL1	7	0.9986	0.580411	0.723148	0.687426	1.23295	0.870372	1.0901	1.14788	1.11361	1.43573	1.20686	1.05637	1.17236	1.00088	0.730856	0.78295	0.816108	0.932808	1.1021	1.14834	2.23969	1.54447	1.58014	1.54686	1.51506	1.09596	0.897351	1.01549	1.08217	1.02074	1.14679	1.32234	1.22686	1.18761	1.12399
M0R2K9	FKBP8	5	0.9982	1.44335	1.01885	1.24708	1.12405	1.52661	0.967049	0.916504	1.03763	0.984138	1.12292	1.09885	1.09253	0.932969	1.04364	1.08287	1.16258	0.688759	0.917649	0.846767	0.751126	0.870186	0.560681	0.652141	0.825766	0.99064	0.842303	0.719079	0.758349	0.896798	0.891131	0.900361	0.778766	0.899029	0.859607
M0R2S1	UBA52	108	1	0.796875	1.11095	0.940696	0.916023	0.962625	1.04131	1.16493	1.14923	1.17685	1.22989	1.22508	1.2729	1.01885	0.904672	1.32693	0.840244	1.03389	0.907758	1.07361	0.952023	0.829155	0.739791	0.911012	0.965099	0.794041	0.861158	0.911408	0.813416	0.82978	0.737587	0.620848	0.725069	0.625456	0.815753
M0R2Z9	SUGP2	94	1	0.878554	1.01357	0.963488	1.00268	0.966083	1.16601	0.968783	0.973094	1.05798	1.09774	1.12243	1.14195	1.06212	0.937872	1.03008	0.948371	1.01345	1.10394	1.07316	1.09502	1.11429	1.00828	0.960113	1.10232	1.10547	1.03751	1.13243	1.01979	1.12632	1.09918	1.17574	1.11021	1.2409	1.23889
M0R3I4	MAG	7	0.9985	0.684182	1.20455	0.915915	0.835065	0.969577	1.25981	0.986282	0.976422	0.777725	1.1911	1.17137	0.829573	1.07074	0.751268	1.01082	0.798308	0.933688	1.05597	1.75481	1.81986	1.16	1.33729	1.26361	1.17745	1.0649	1.2157	1.29975	1.08296	1.33497	1.19258	1.56991	1.36863	1.55582	1.08349
O00115	DNASE2	22	1	0.508809	0.862224	0.789519	0.757751	0.696808	0.886095	1.27627	0.833215	1.14958	1.22406	1.02689	1.08501	1.02491	0.879933	0.968543	0.766148	1.42503	0.995287	1.36988	1.48695	1.56544	1.47939	1.29938	1.54259	1.2554	1.33222	1.41658	2.51136	0.646671	1.16347	0.70741	1.01417	1.16213	1.12851
O00116	AGPS	89	1	1.23159	0.935674	1.17521	1.12012	1.11156	1.06771	1.00214	0.97974	0.778318	0.831256	0.988269	0.93329	0.969159	1.02675	0.963305	1.23002	0.925671	1.01108	0.894861	0.920681	1.15421	1.06678	1.02913	0.91404	1.08946	1.10748	0.927277	0.93549	1.18488	1.07431	1.02757	0.975404	1.11823	1.13375
O00142	TK2	82	1	0.994853	0.969161	0.972827	1.06865	0.948081	1.04151	1.09134	1.17862	1.29224	1.12914	0.88213	1.01397	1.11904	1.16042	0.947239	1.08733	0.988635	0.951277	1.04636	0.78074	0.781711	0.755875	0.938686	0.952465	1.00979	0.945578	0.968132	0.884073	0.713172	0.850282	0.795434	0.820757	0.82246	0.869329
O00148	DDX39A	10	1	1.08865	1.00658	0.998105	1.13624	1.09795	1.01054	0.935079	0.986976	1.12571	1.21171	0.959294	1.03155	0.99092	0.899229	0.905389	1.18701	1.12767	1.01068	1.3348	0.943496	1.14425	1.06465	1.05457	1.17077	1.18241	1.05292	1.10891	0.984661	1.16746	1.07534	1.31276	1.3354	1.02046	0.812489
O00151	PDLIM1	21	1	0.791212	1.04233	1.13697	1.1307	0.988532	1.16408	1.01245	1.30233	0.836278	1.0665	1.00832	0.937993	0.919511	1.00056	0.978142	0.77726	0.903887	1.05382	1.0369	1.00508	1.20583	1.13589	1.21466	0.890033	0.898781	0.997828	1.30578	1.24866	1.49153	1.10908	1.32583	1.26027	1.18968	1.23753
O00154	ACOT7	258	1	1.37071	1.01576	0.986102	1.19191	0.86772	0.892887	0.883119	1.06986	1.33939	0.979047	1.07833	1.04937	1.34916	1.29947	1.08709	0.969314	1.06713	0.784022	0.734414	0.740032	0.829998	0.924079	0.873713	0.885927	0.781369	0.789433	0.795361	0.947608	0.701016	0.805572	0.729144	0.790936	0.705571	0.719709
O00159	MYO1C	88	1	0.877702	0.96893	1.01984	0.911782	0.87793	1.0805	1.02597	1.37734	0.948274	1.06945	0.97448	0.845153	0.9183	1.09016	0.914482	0.948867	0.869034	1.23773	1.04216	1.14463	1.23664	1.30733	1.21399	1.00179	1.27253	1.04872	1.5308	1.21372	1.69164	1.21716	1.31635	1.40795	1.33312	1.4209
O00160	MYO1F	12	1	1.06155	1.10862	0.696041	0.939327	1.00084	1.05068	1.01943	0.857112	0.922084	0.994198	1.01674	1.02558	1.05828	0.979554	0.882324	1.16316	0.946251	1.10734	1.08297	1.21599	1.36371	1.44675	1.4427	1.07089	1.3573	0.95603	1.11386	1.0746	1.75808	1.02804	1.05212	1.61062	1.42202	1.42208
O00161	SNAP23	117	1	0.876918	1.00621	1.09126	0.991904	1.12394	1.07946	1.18618	1.09969	1.10837	1.24633	0.948191	0.972612	0.893853	0.977389	0.967206	1.17602	1.01062	1.11187	0.94924	1.03289	0.937085	1.02684	0.883797	1.05166	1.15118	1.19359	0.965414	1.07704	0.962863	0.87902	0.736091	0.624248	0.833417	0.807101
O00165	HAX1	78	1	0.814331	1.05819	0.96398	0.954237	0.986909	1.08824	0.939268	1.0157	1.41636	1.3626	1.04081	0.985329	1.14417	0.999523	1.00298	0.999835	1.086	1.02342	1.03863	1.10571	0.923828	0.796868	0.968304	0.997705	0.959042	0.814988	1.05448	0.864336	0.967453	0.862251	1.0363	0.768001	1.00011	1.17103
O00168	FXYD1	26	1	0.662281	0.797931	0.924895	0.901996	0.924074	0.963672	1.26923	1.35431	1.0378	0.988385	1.05318	0.770887	0.813669	1.06764	0.994286	0.777557	0.86896	1.36583	1.05347	1.41132	1.30972	1.17794	1.14568	0.972253	1.28889	1.13277	1.06429	1.037	1.15764	1.08088	1.40121	1.37565	1.36627	1.56748
O00170	AIP	99	1	1.10444	1.10135	1.0983	1.00592	1.10602	1.01051	0.974939	0.968467	1.03028	1.14852	0.947139	0.933661	0.905158	1.0393	1.03189	1.09296	0.96409	1.04298	0.88251	0.831606	0.968154	0.845438	0.965969	0.914765	0.971054	0.940825	0.929856	0.881627	0.960191	0.788743	0.979182	0.915257	0.871657	1.07596
O00178	GTPBP1	53	1	1.25595	0.916466	0.912068	1.00085	1.15485	1.00679	0.930448	0.914768	0.934683	0.957285	0.987368	0.98883	0.93226	0.89365	0.927732	1.19413	0.936273	1.13003	1.09904	1.09564	1.12156	1.16011	1.04726	1.00332	1.12949	1.04055	1.09581	1.12246	1.2441	1.31029	1.27237	1.33818	1.13428	1.31786
O00182	LGALS9	17	1	0.693404	0.770314	0.877915	0.878259	0.909825	1.00857	1.3397	0.88597	1.09142	0.914317	0.948285	0.875149	0.811784	0.854927	0.803064	0.779574	1.31262	1.4793	1.19662	1.26167	1.23127	1.20869	1.42777	1.16554	1.03168	1.09868	0.899461	1.34498	1.75663	1.23441	0.870646	0.951013	0.951269	1.05502
O00186	STXBP3	59	1	1.22083	0.970973	1.02753	1.06892	1.10358	0.944875	0.888661	0.999808	0.91871	0.936948	0.937788	0.914884	0.914728	1.07314	0.911854	1.2857	0.961454	1.20783	0.96059	1.02758	1.02191	1.00378	0.977744	0.951852	1.11671	1.09161	1.02303	1.00001	1.02934	1.23265	1.32455	1.10469	1.22665	1.05907
O00192	ARVCF	112	1	0.99938	0.898913	0.903924	0.951699	1.08711	0.970913	1.03392	0.975696	0.897091	0.934776	1.05135	1.0699	0.997828	0.930949	1.08708	0.921685	1.06243	1.1505	1.04936	0.965054	1.07626	1.14605	1.15238	0.974989	1.16479	1.09674	1.11031	0.922741	1.24405	1.20996	1.36012	1.37106	1.14163	1.30715
O00193	SMAP	87	1	0.820022	1.14208	1.04135	0.848029	0.78366	0.843155	1.07066	1.15754	1.04668	1.14148	1.07484	0.909442	1.19637	1.2416	0.961514	1.13464	1.02096	0.952309	0.897858	1.01374	1.10502	1.20894	1.12736	1.19188	1.10705	0.991815	0.929766	1.21068	0.867325	0.998599	0.89476	0.89048	0.859858	0.769216
O00194	RAB27B	114	1	1.15818	1.30514	1.11342	0.910479	0.998779	0.933218	1.10388	1.07689	1.20339	1.03087	1.1443	1.22339	1.15202	1.0238	0.927663	1.0829	1.18187	0.706567	0.829692	1.11678	0.903614	1.03832	0.870751	1.16879	0.940012	0.719345	0.924408	0.934712	1.09006	1.0772	0.748904	1.14781	1.23002	0.917446
O00203	AP3B1	94	1	1.0286	0.974082	0.978382	1.06392	1.04494	0.930323	0.962305	1.12422	0.92849	0.977919	0.980076	1.01035	0.917837	1.00036	0.987583	1.02941	1.08817	1.10029	0.962083	1.12074	1.15187	1.13264	1.09435	1.02131	1.10817	1.09077	0.996502	1.21897	1.06945	1.26909	1.27473	1.08725	1.32639	1.33818
O00213	APBB1	89	1	1.10898	1.03962	1.09581	0.965631	0.820284	0.952223	1.00688	0.97562	1.01477	1.06904	1.07989	1.0888	1.01358	0.965239	1.13953	1.02076	0.947909	1.01434	1.01194	0.806856	0.935563	0.833466	0.81986	0.959839	0.82723	0.850616	0.986652	0.811182	0.897795	0.938139	1.12897	1.02266	0.806349	0.899666
O00214	LGALS8	93	1	0.885667	0.845209	0.924986	1.08394	0.829564	0.830611	0.989512	1.00464	1.10476	1.03662	0.860171	0.911808	1.12194	1.177	1.06931	0.993648	1.24734	1.2229	1.03754	0.969291	1.15649	0.948561	1.13829	1.16061	1.16149	1.12255	0.937501	1.03302	1.17324	1.05164	0.88735	1.10992	1.0956	1.14189
O00217	NDUFS8	137	1	1.0852	1.19671	1.22102	1.05788	1.00604	0.944732	1.11739	1.15167	1.15948	1.02049	1.02878	1.22464	1.13739	0.99779	1.18503	1.08769	1.12022	0.991225	0.852794	0.617268	0.741183	0.731919	0.762527	0.966966	0.655557	0.865074	0.885368	0.618444	0.6807	0.650921	0.578441	0.720975	0.595261	0.661274
O00230	CORT	11	0.9972	1.3035	1.51723	0.798147	0.543563	0.831642	0.579902	0.414045	0.355273	0.79959	0.869764	1.7608	2.0937	1.54686	1.52748	1.19795	0.779673	1.14155	0.543436	1.34619	0.783304	0.615491	0.638412	0.509217	1.68573	0.664389	0.40991	1.06826	0.240106	0.425858	0.314729	0.733986	1.11881	0.822191	0.690114
O00231	PSMD11	220	1	1.56799	1.10241	1.17487	1.081	1.22678	0.997412	1.01571	0.972436	0.822023	0.824989	0.925091	0.877793	0.932187	1.07021	1.01436	1.27118	0.843871	0.847965	0.832081	0.816316	0.85086	0.830914	0.764843	0.87303	0.982505	0.863488	0.924455	0.8263	0.865486	0.908024	0.929048	0.878662	0.869572	0.863987
O00232	PSMD12	180	1	1.87819	1.0429	1.21613	1.11701	1.24952	0.986639	0.921781	0.99908	0.832299	0.789579	0.90968	0.871493	0.931222	1.0587	0.977501	1.23713	0.853994	0.91447	0.841021	0.813058	0.833289	0.767772	0.825076	0.845523	0.95776	0.900692	0.910529	0.916657	0.875479	1.06772	1.04557	0.872007	0.94411	0.792651
O00233	PSMD9	122	1	1.02288	1.11599	1.03542	1.02541	1.13575	1.01642	1.02373	0.96417	1.0072	0.991607	0.975476	0.992763	1.17345	1.08493	1.02746	1.10376	0.952133	0.955339	1.00663	1.06175	0.986695	1.02437	0.963694	1.09562	1.05566	0.993056	0.937734	1.02142	0.9679	0.943564	0.872015	0.789234	0.758766	0.864053
O00241	SIRPB1	9	0.9976	0.73232	0.633903	0.940936	0.492486	1.21413	0.940343	1.10519	1.19052	1.13856	1.06793	1.69014	0.85514	1.06545	0.791538	0.767589	0.619357	1.10962	1.18667	3.47991	2.60651	1.79503	1.57741	0.56605	1.61524	0.585416	1.09276	1.66332	4.30342	1.77776	3.02256	1.79432	3.26528	4.81919	1.80876
O00244	ATOX1	56	1	1.02805	1.20176	1.12074	0.894252	0.873382	0.803809	0.994864	1.11124	1.0558	1.23639	1.11693	1.29701	1.21367	1.04025	1.06779	0.945952	1.03579	0.919017	0.751166	0.628293	0.918206	0.97727	0.743268	1.18933	0.794792	1.03891	0.811577	1.11152	0.745524	0.613951	0.562509	0.651643	0.494156	0.46743
O00255	MEN1	13	1	0.789012	0.674783	0.895526	0.988774	1.05264	1.10058	0.991768	0.915364	0.892475	1.02844	1.17347	1.00488	0.960075	1.30177	0.991092	1.23595	0.882147	0.977335	1.12947	0.905457	1.10979	1.02237	1.04859	0.881878	1.2205	1.07502	0.981971	0.915842	1.11342	0.999576	0.822925	1.29745	1.01445	1.13691
O00257	CBX4	4	0.9999	0.619996	0.91197	NA	0.776025	1.14862	1.24229	0.997069	0.838139	NA	NA	NA	0.802274	0.571925	0.85709	1.07803	0.723787	1.11116	NA	1.11052	1.4186	1.07326	NA	NA	0.95847	0.847014	0.902578	1.14448	1.20544	NA	1.43079	1.66143	NA	1.58139	1.24585
O00264	PGRMC1	192	1	1.01733	1.1659	1.04455	0.757442	0.756032	0.73864	1.31432	1.22947	0.835731	1.06452	0.883109	1.42075	1.22133	1.04835	1.02213	1.10034	1.16841	0.969233	0.683896	0.657018	0.96422	1.00673	0.790699	1.14084	0.865164	1.13444	1.00406	1.04786	0.822121	0.614814	0.640443	0.527564	0.588777	0.636813
O00267	SUPT5H	61	1	0.892034	0.890397	0.929223	0.938723	1.06914	1.04347	0.966744	0.98341	1.01534	1.0513	0.939202	1.033	0.948002	0.941502	0.928975	0.953568	1.06384	1.21008	1.05452	1.12252	1.10482	1.22091	1.1523	1.07429	1.19865	0.991865	1.13171	1.05193	1.09069	1.18824	1.161	1.13627	1.09894	1.17443
O00273	DFFA	97	1	0.973342	1.09108	1.07238	0.986306	0.986496	1.00907	0.990909	1.01122	0.920844	0.975168	0.936369	1.00102	1.10167	1.03382	0.930671	1.10549	0.897703	0.968099	0.882781	0.876005	0.991699	0.891584	0.833419	0.992122	1.12859	0.987846	0.920157	0.991271	0.937183	0.896953	0.841116	0.862132	0.811248	0.870697
O00287	RFXAP	8	1	0.893482	0.629182	0.83721	1.0047	0.80656	0.593742	0.87321	0.830359	0.721267	0.949952	1.02109	0.751381	0.755359	1.22882	1.19686	0.795204	1.1528	0.780508	1.04042	0.6195	1.13587	0.980327	0.841378	0.89477	0.943725	0.922708	0.700278	0.915628	1.08311	0.834903	0.79612	1.06774	0.883755	1.22378
O00291	HIP1	34	1	0.87794	0.963103	0.977491	0.984475	1.08374	1.16524	0.929695	0.911184	0.992042	1.04843	1.01116	0.830288	0.9821	1.0059	0.883006	0.972496	0.827543	1.54901	1.26698	1.24152	1.21144	1.17397	1.10811	1.07387	1.13481	1.17187	1.11016	1.23522	1.12256	1.23488	1.39293	1.18787	1.35111	1.34311
O00299	CLIC1	111	1	1.20031	0.930336	1.08555	1.08256	0.912269	0.751699	1.01226	1.13985	0.914707	1.02252	0.682879	0.839998	0.844173	0.917737	0.700129	1.18132	1.36531	0.761177	0.742222	0.764969	1.10002	1.19683	0.845164	1.06695	2.15025	1.44062	1.07336	1.26702	0.978049	0.764756	0.690019	0.664808	0.753271	0.879491
O00300	TNFRSF11B	7	0.993	1.42148	1.11184	1.15331	1.17601	1.11604	0.926157	0.939516	0.976507	0.746975	0.886632	1.01903	1.01739	1.05107	0.808402	0.940099	1.12129	0.945631	0.742056	0.841131	0.831731	1.21171	1.09924	1.01649	0.917706	1.54935	1.29641	0.884849	1.46937	0.795963	0.8589	0.893864	0.818687	0.932411	0.857067
O00303	EIF3F	124	1	1.02666	0.951247	0.988067	1.02524	0.948798	1.01146	0.988386	1.01045	1.1535	1.12848	1.02432	0.977008	1.04446	0.966333	1.03347	0.951449	1.02897	0.951719	1.01678	0.92504	0.883883	0.901736	0.894023	0.964017	0.940261	1.06687	1.01831	0.89517	1.02144	0.840743	0.798628	0.860993	0.796128	0.948998
O00305	CACNB4	75	1	1.02336	1.0625	0.921646	0.940294	0.948159	1.17377	0.914791	0.980819	1.15835	1.02793	1.09735	1.08373	1.08009	1.09276	1.08085	0.947647	0.958949	1.04816	1.14063	1.12559	0.917363	0.98863	1.07913	1.04991	0.90188	0.919722	1.06339	1.02309	1.09884	1.16148	1.17803	1.1109	1.18314	1.14927
O00308	WWP2	34	1	1.07139	1.01502	1.06714	1.06607	0.96766	1.05745	1.09486	1.11867	1.00163	1.14599	1.06254	0.945717	0.972657	1.24932	1.20736	1.21735	0.934584	1.23534	1.32687	1.02184	1.10624	1.01225	0.997371	1.00364	0.899713	0.846106	0.97451	1.05055	1.10812	1.19046	1.07707	1.35947	1.22058	1.13106
O00330	PDHX	215	1	1.64408	0.94949	1.16907	1.13418	1.1711	1.13704	0.933776	1.08956	0.899701	0.813253	0.945745	0.912422	0.976089	0.890597	0.924186	1.10886	0.807659	0.995989	0.939078	1.0021	0.85879	0.887369	0.870573	0.851868	0.873765	0.890643	0.907739	0.83114	0.943321	0.983818	0.884363	0.932073	0.953875	0.816902
O00339	MATN2	24	1	0.867675	0.906873	0.691051	1.05348	1.06747	1.04501	0.79823	0.959468	0.68933	0.894171	0.838526	1.00268	0.691648	0.782687	0.986094	0.743295	1.78476	0.858948	1.13007	1.39286	1.21818	0.881886	1.43425	1.1206	1.58726	1.31129	1.37993	1.2899	1.35918	1.33082	1.29721	0.986835	1.53925	2.25612
O00391	QSOX1	72	1	0.984134	1.0763	1.07294	1.03764	1.04751	1.12331	1.07896	0.91022	0.94425	0.952731	1.03525	0.94275	1.07863	1.0422	1.00093	0.988895	1.0943	0.880974	1.08826	1.02496	0.948605	0.962357	0.886396	0.974227	0.836425	1.00507	0.994589	0.935093	1.00579	1.06906	0.895662	0.902309	0.921823	0.82209
O00399	DCTN6	81	1	1.13292	1.06133	1.05142	1.06035	1.02123	0.936664	1.03349	0.999388	1.40014	1.26506	1.0059	1.15789	1.32412	1.25305	1.05818	1.038	1.00108	0.905899	0.782319	0.660461	0.705568	0.766197	0.720357	0.992485	0.882606	0.742049	0.790939	0.84928	0.702263	0.64252	0.592587	0.624269	0.620782	0.689286
O00400	SLC33A1	8	1	0.693627	0.687827	0.79117	0.962872	1.02358	0.618549	1.65865	1.5528	1.07467	1.19731	1.02375	1.08637	1.13832	0.860397	0.805901	0.860734	0.788794	0.919571	1.60208	1.38358	1.66532	1.27922	1.18563	2.64925	1.42196	0.768381	1.02924	2.37537	1.04217	0.889881	0.761661	1.35511	1.31825	1.17016
O00401	WASL	229	1	1.52771	1.17162	1.12424	1.15597	0.991953	1.01817	0.958614	1.00394	0.943623	0.914827	0.938854	0.935103	1.14664	0.963506	0.985613	1.1094	1.02841	0.638953	0.902595	0.710182	0.756365	0.726039	0.743708	0.777729	0.694135	0.837882	0.927498	0.717009	0.660468	0.73675	0.785134	0.682586	0.802528	0.745522
O00408	PDE2A	239	1	1.88253	1.16935	0.944441	0.996624	0.912295	0.852055	0.916599	1.03555	0.865822	0.863816	0.976346	1.11414	1.17904	1.15557	1.03491	1.08195	0.910397	0.807054	0.889128	0.772731	0.925088	0.848301	0.845776	0.951398	0.844144	0.898506	0.937824	0.829321	0.858651	1.04711	1.16887	1.14449	0.969298	0.985912
O00410	IPO5	314	1	2.3707	1.13805	1.18844	1.06657	1.02676	0.919689	0.872395	0.993699	0.74696	0.768382	0.864968	0.932777	0.986486	1.05207	0.945371	1.21853	0.850987	0.838311	0.809899	0.786582	0.866547	0.826086	0.794718	0.834344	0.911801	0.871664	0.919511	0.817126	0.72903	0.922218	0.881193	0.831116	0.811345	0.802104
O00422	SAP18	122	1	0.70987	0.939416	0.883747	0.878721	0.867982	0.86554	1.11132	0.853032	1.56525	1.5878	1.06861	1.13835	1.11939	1.23485	0.985961	1.00451	1.11582	1.13213	0.719822	0.991085	1.00684	1.04299	0.923193	1.17531	1.03246	0.964692	1.06162	1.00934	0.983787	0.90772	0.753455	0.917967	1.00502	1.1324
O00429	DNM1L	2	1	1.44175	1.11965	NA	1.03864	1.34034	1.18296	NA	NA	NA	NA	NA	1.05679	0.841832	NA	NA	1.25065	NA	NA	1.14898	1.42887	1.69543	NA	NA	1.02385	1.23737	NA	1.22727	NA	NA	NA	1.44925	NA	1.69865	1.902
O00442	RTCA	78	1	1.32549	1.14719	0.946845	1.14803	1.09459	1.07005	0.966038	0.993139	1.08218	1.1	0.977552	0.906501	0.921522	1.03991	1.07755	1.18118	0.90594	1.14275	0.897156	0.842782	0.882268	1.03288	0.962165	0.910014	1.0168	0.832096	0.899988	0.751948	0.981606	1.04021	1.05541	1.20574	0.940067	0.939785
O00443	PIK3C2A	15	1	0.755715	0.88029	0.669313	1.08586	0.848904	1.06372	1.02379	0.950747	0.683559	0.587625	0.680547	0.854398	0.98995	0.884079	1.0031	1.06936	1.19721	0.96022	1.21275	1.10669	1.14953	0.729842	1.17469	1.14195	1.08003	1.24831	0.962988	1.01852	1.28475	0.950933	1.41852	0.961367	1.21454	1.23359
O00445	SYT5	79	1	1.14044	1.11947	0.991923	1.09936	0.914182	0.956443	0.952405	1.01653	1.10126	0.95672	0.898081	1.14834	1.18346	0.921455	0.908859	1.01792	1.0636	0.789218	0.916088	1.16866	0.882683	0.894947	0.90927	0.962635	1.0172	1.01188	0.977513	0.863411	0.906966	1.10559	1.2113	1.26267	1.18158	1.15589
O00451	GFRA2	36	1	1.00525	0.949915	1.13607	0.864454	1.02354	1.01162	1.15327	0.912443	1.35067	1.12484	0.975459	0.999489	1.10474	1.17309	1.3036	0.964547	0.867912	1.19485	0.98882	1.03432	1.02317	0.957915	1.0363	0.930693	0.773369	0.79356	0.948537	1.1942	0.800093	0.817489	0.722977	0.831112	0.879283	0.78558
O00458	IFRD1	10	1	1.10618	1.15115	0.745166	0.948398	0.746204	1.46565	0.784928	0.896581	1.09735	0.659603	0.559859	1.0372	1.1649	0.794541	0.941311	0.861944	1.65546	0.595504	1.29752	0.784049	0.44621	0.384168	0.661956	1.09361	0.556487	1.07605	1.33452	0.46408	0.375516	0.949617	1.12602	0.670103	0.48736	0.744659
O00459	PIK3R2	20	1	0.866229	0.988524	0.910819	1.05313	1.02187	0.952187	0.987752	0.908758	1.10992	1.09254	1.17541	0.936246	1.01155	0.872215	0.915832	1.0947	1.12613	0.968742	1.05287	1.07585	1.17976	1.20053	1.14032	1.02217	1.14221	1.31674	0.942031	0.949635	1.38024	1.11498	1.12837	0.974812	1.10599	1.20283
O00461	GOLIM4	6	1	0.765706	0.757982	0.841902	1.07224	0.911871	1.07394	1.12146	1.01961	0.882861	0.916193	0.95822	1.06611	0.901447	0.881165	1.27316	0.789221	1.03211	1.1439	1.27791	1.3491	1.5002	1.38397	1.2742	1.06036	1.24415	1.29753	1.18031	1.36769	1.24724	0.881665	1.2324	1.32904	1.53462	1.51877
O00462	MANBA	79	1	0.817809	0.92419	1.06966	1.10367	1.06074	1.05027	1.02352	0.912385	1.11926	0.950672	1.0758	0.91372	1.1809	0.992812	0.933852	0.848061	1.064	1.17816	1.16433	0.924716	1.00169	1.07994	1.19649	0.903686	0.962573	1.13784	1.03055	1.02788	0.842857	0.944119	0.684592	0.854579	0.874543	0.769207
O00463	TRAF5	4	0.9971	0.552339	0.557347	0.883469	0.854449	0.87685	0.995816	NA	NA	0.910006	1.10871	1.15813	0.668319	0.875705	NA	NA	0.721403	NA	1.09626	0.860514	3.25577	2.2268	2.05095	2.21619	1.53774	2.60905	NA	1.15508	NA	1.81937	NA	1.86331	1.77482	2.69813	1.24777
O00468	AGRN	19	1	0.925813	0.933954	0.817458	0.883126	0.901978	1.04334	0.811068	1.10375	1.04547	1.15795	0.873168	1.03778	0.77431	0.901357	0.973582	0.878462	0.954052	1.23038	1.12563	1.02214	1.00939	1.00635	1.22913	0.931518	1.27797	0.865533	1.12982	1.31238	1.25264	1.07543	1.40376	1.16503	1.23518	1.28924
O00471	EXOC5	55	1	1.69361	0.940498	0.929899	1.05595	1.11002	0.98171	0.865995	0.912253	0.907566	0.945837	0.965717	0.986983	0.984541	0.989393	1.00182	1.10659	0.870871	0.967414	1.01272	0.971668	1.0614	1.01598	0.958679	0.904383	1.13375	1.04501	1.07072	1.01278	1.01693	1.38863	1.82261	1.27146	1.26424	1.18057
O00478	BTN3A3	70	1	1.0742	0.786076	0.901167	0.932783	1.07062	0.956784	1.1529	0.997912	1.00223	1.20008	1.05058	0.934172	0.960241	1.21094	0.903346	0.957612	1.12502	1.01562	1.03588	1.20184	1.05102	1.11825	1.17842	1.31205	1.14765	1.18867	1.20891	1.27563	1.29631	1.26373	1.34585	1.30789	1.17188	1.24423
O00479	HMGN4	71	1	0.4858	0.815447	0.805587	0.82885	0.907621	1.02204	1.16892	0.901526	1.47036	1.58436	1.30456	0.911224	1.04342	1.11902	0.887763	1.0395	1.11039	1.01764	1.03737	1.09761	1.07372	1.16171	1.17197	1.27591	1.15301	1.1	0.959398	1.17109	1.5899	0.931916	0.696308	1.09072	1.09684	1.27969
O00483	NDUFA4	76	1	1.2277	1.14987	1.01046	1.09488	0.9663	0.89858	0.967236	1.33868	1.43991	1.14889	1.0635	1.28816	1.17446	1.07568	0.988442	0.997727	1.10631	0.797802	0.744384	0.70227	0.656922	0.661717	0.692288	1.08018	0.669351	0.73766	0.895597	0.747675	0.627631	0.564227	0.610696	0.523004	0.444065	0.6048
O00487	PSMD14	115	1	1.69781	1.07917	1.16609	1.21439	1.34459	1.1364	0.967225	1.06115	0.884371	0.853008	0.951503	0.932185	0.89432	0.876214	1.04976	1.25858	0.868313	0.894974	0.730273	0.819316	0.796137	0.805898	0.801123	0.766714	1.0688	0.825967	0.822567	0.752823	0.979086	0.937272	0.715618	0.813037	0.685408	0.899644
O00488	ZNF593	5	0.9996	NA	0.541378	0.80457	NA	NA	1.44568	0.911858	0.889158	1.06498	1.37311	1.02994	NA	1.2493	0.960298	0.980595	NA	1.38494	1.18857	1.37767	1.12636	NA	0.900175	0.820015	0.850168	NA	1.26467	0.757043	1.05759	1.35834	0.72032	1.18051	0.66926	NA	NA
O00499	BIN1	452	1	1.66036	1.37388	1.48529	1.09926	1.36475	1.03582	1.18319	0.964567	0.774299	0.693707	0.863605	0.962133	1.04216	0.895141	0.962894	1.34817	0.736129	0.705042	0.825373	0.500613	0.53779	0.62506	0.530954	0.633241	0.506331	1.00703	0.669694	0.606873	0.488131	0.570596	0.463962	0.464274	0.450655	0.422487
O00505	KPNA3	29	1	1.53966	1.02729	1.18593	1.09255	0.961752	0.942747	0.850275	0.916992	0.908641	0.94191	0.915523	0.94796	1.15652	1.12869	1.05253	1.19751	1.07056	0.892117	0.774129	0.902316	0.992311	0.911664	0.683357	1.0696	1.12508	1.16342	1.13324	0.964173	0.797111	0.718027	0.922623	0.650754	0.807513	0.845279
O00506	STK25	19	1	1.30159	1.05924	0.946081	1.11105	1.23134	1.12761	1.17981	0.966055	0.853639	0.880974	0.915508	1.00611	0.91317	1.20906	1.15717	1.276	1.11731	0.970798	1.06139	0.99582	1.02215	0.773237	0.897404	0.839223	1.02616	1.07881	1.0606	0.90979	1.13778	1.34234	1.27185	0.898456	1.26056	1.21978
O00519	FAAH	86	1	0.895751	1.07294	1.04653	1.18642	1.4074	0.867372	1.16202	0.931988	0.919516	0.820031	1.1533	0.957035	1.01964	1.01138	0.986265	1.05473	0.974175	0.886109	1.05954	0.942818	1.10572	0.997092	0.891857	1.01857	0.853715	0.965809	1.16711	0.978939	0.868049	1.0502	0.941409	0.979727	0.909557	0.858062
O00533	CHL1	414	1	1.29276	1.18365	1.20877	0.979092	1.19235	1.003	1.07966	0.831569	1.05878	0.903681	1.19672	1.12022	0.957522	1.11497	1.20449	1.0259	0.855343	0.755504	0.855386	0.705751	0.710232	0.720962	0.719501	0.75831	0.665282	0.71179	0.876531	0.746479	0.687351	0.804432	0.729925	0.650092	0.732722	0.692794
O00534	VWA5A	130	1	1.42848	1.0706	1.06478	1.096	1.0176	0.978054	0.89555	0.938864	0.711344	0.710904	0.840786	0.994961	1.08114	0.740584	0.860921	0.94808	0.943871	0.869117	0.964218	0.926543	1.11229	1.02381	0.979074	0.852259	1.27444	1.09988	0.828941	0.823297	0.916419	1.10639	1.10773	0.980528	1.0016	0.886974
O00541	PES1	3	1	NA	0.742487	NA	NA	NA	1.0507	0.715443	0.990777	NA	NA	NA	NA	0.592989	0.806107	1.01514	NA	0.87498	NA	1.15786	0.992127	NA	NA	NA	0.761091	NA	0.814371	1.01601	0.571729	NA	0.638891	1.09361	NA	NA	NA
O00559	EBAG9	10	1	1.27569	1.22564	0.919302	0.870133	0.935974	1.00916	0.724269	0.839366	1.01541	1.03315	1.05122	1.09775	1.07894	1.02842	1.03242	0.933687	1.12313	0.897334	1.02563	0.801459	0.9728	0.821236	0.786863	0.731001	0.788522	0.845335	0.909397	0.911615	0.866095	0.738782	1.03306	0.747661	1.33414	0.902118
O00560	SDCBP	8	1	0.814049	1.17413	1.19845	1.20861	1.55493	1.23222	1.13511	1.03706	1.32471	1.39601	1.11187	0.843874	1.1474	0.929252	1.09281	0.994316	0.778717	0.919598	0.776487	0.899877	0.944275	0.770979	0.724292	0.747175	0.781664	0.848792	0.695727	0.851427	0.801643	0.638877	0.687347	0.592314	0.472465	0.627607
O00562	PITPNM1	107	1	1.01956	0.959715	0.920012	0.909506	0.878721	0.930432	0.90826	1.03902	1.02693	0.938234	0.983748	0.994366	1.01486	0.928019	0.911593	1.07945	1.14066	1.11392	1.11042	1.00188	1.0641	1.07646	1.03341	1.06021	1.00593	0.940012	1.0402	0.940637	1.20542	1.06007	1.10152	1.19252	1.10632	0.962439
O00566	MPHOSPH10	2	0.9928	NA	0.526398	0.410654	NA	NA	0.986068	NA	NA	0.839852	1.01823	0.948769	NA	0.920814	NA	NA	NA	NA	1.06107	0.926931	0.8433	NA	0.847676	0.809127	0.81218	NA	NA	1.65881	NA	0.926246	NA	1.27848	0.610435	NA	NA
O00567	NOP56	113	1	0.976259	0.885107	0.934052	1.08122	1.26666	1.20063	1.03291	1.05301	0.909368	0.919013	1.07264	1.02264	0.789921	0.83776	1.15865	0.960671	0.942058	0.989304	1.02094	1.12569	1.08874	0.956495	1.06102	0.891013	1.17261	0.934294	0.978068	1.05471	1.12817	1.22855	1.06902	1.20748	1.34937	1.22652
O00584	RNASET2	90	1	0.604594	0.936307	0.914047	0.87514	0.823649	1.1098	1.26747	0.953317	1.11924	1.16775	0.947857	1.15425	1.05205	0.897947	0.861639	0.814482	1.25277	1.06685	1.1191	1.2494	1.04009	1.10109	1.15331	1.22093	1.21148	1.18344	1.06657	1.26418	1.03404	0.958672	0.660852	0.732864	0.726311	0.759322
O00592	PODXL	46	1	1.34665	1.40172	1.32368	0.987112	1.15298	0.984891	1.19662	0.933391	1.11221	0.864665	0.840808	0.961227	1.18062	0.792149	0.838766	1.13165	0.900445	0.862052	0.758967	1.25959	1.00175	0.825128	0.834809	1.06353	1.10789	0.923021	0.999288	0.915117	0.79279	0.64154	0.613725	0.829626	0.804819	0.618717
O00623	PEX12	3	0.9961	0.913877	NA	NA	1.09869	1.12221	NA	1.14233	0.966587	NA	NA	NA	0.906132	NA	0.936308	0.977448	0.924854	1.03077	NA	NA	NA	1.0658	NA	NA	NA	1.08139	1.05124	NA	1.04465	NA	1.166	NA	NA	1.10828	1.15231
O00625	PIR	122	1	0.917174	0.952047	1.08802	1.01019	0.975573	1.07053	1.20561	1.20842	1.35594	1.19991	0.829413	0.962841	0.983162	0.926893	0.926568	0.952974	0.975969	0.849039	0.795846	0.772283	1.24747	0.860131	1.00513	1.03098	1.46833	1.2891	0.881081	1.0314	0.837986	0.888921	0.748842	0.662138	0.856312	0.808976
O00629	KPNA4	110	1	1.62035	1.19235	1.11304	1.11105	1.04151	0.942992	0.84177	0.939134	0.854923	0.823584	0.848334	0.956171	1.10614	1.12373	0.989678	1.21204	1.02058	0.848207	0.865662	0.605248	0.811773	0.764462	0.659089	0.827107	0.921302	0.972396	0.912112	0.800726	0.844018	0.790901	0.762392	0.838883	0.597011	0.765327
O00743	PPP6C	89	1	1.22751	1.13103	1.0543	1.03257	0.933931	0.906409	0.924203	1.02175	1.12463	0.983251	0.923294	1.01491	1.17289	1.10121	0.978607	1.11532	1.11381	0.859825	0.951515	0.878211	0.926499	0.846088	0.746665	0.971391	0.891733	0.981608	0.906772	0.920878	0.750638	0.950573	0.920713	0.767957	0.932865	1.00666
O00746	NME4	37	1	0.768824	0.773742	0.825476	0.810587	0.785083	0.899555	1.08465	0.983088	1.18691	1.27694	1.10252	0.927045	1.04371	1.11767	0.949226	0.865031	0.989124	1.13869	0.917835	1.14979	1.07083	1.12292	1.03445	1.25336	1.63542	1.0246	1.00984	1.30199	1.21945	1.17056	1.15807	1.16426	1.27456	1.29475
O00748	CES2	15	1	1.0551	1.02422	0.989754	1.27531	0.895976	1.02806	0.963207	1.29492	0.772141	0.991571	1.05142	0.896259	1.01248	0.957091	0.951319	1.02634	0.919867	0.968837	1.03793	1.26976	1.13296	1.22879	1.46858	0.920039	1.16815	1.07121	1.07896	1.18097	1.07281	0.899406	0.855358	1.07298	0.956802	1.06251
O00750	PIK3C2B	2	0.9952	0.862004	NA	NA	0.985234	1.2054	NA	0.942635	1.0483	NA	NA	NA	0.866082	NA	1.08866	0.960172	1.05426	1.20255	NA	NA	NA	1.24962	NA	NA	NA	0.9746	1.12462	NA	1.18639	NA	1.43403	NA	NA	1.45439	1.49136
O00754	MAN2B1	190	1	0.652432	0.878618	0.835273	0.929713	0.918242	0.979448	1.19868	0.816236	0.957738	1.03156	1.09209	1.00924	1.15961	0.996632	0.902468	1.01346	1.06745	0.975724	1.49307	1.00537	1.07103	1.17405	1.13251	0.986107	0.959708	1.41439	1.10693	1.535	1.04139	0.929717	0.861704	0.755168	0.860644	0.97696
O00757	FBP2	28	1	0.802243	0.826787	0.972514	1.11851	1.03315	0.933592	0.864314	0.948283	0.600732	0.69794	0.753965	0.687784	0.773567	0.785964	0.859455	1.17085	1.0131	0.496563	1.30935	1.68777	2.9977	2.57902	2.14015	0.79862	1.3965	1.03612	0.871956	2.91797	0.543749	0.885059	0.775848	0.662429	1.11062	0.784601
O00763	ACACB	11	1	0.985613	0.854034	0.835142	0.921579	0.947778	1.1734	0.913212	0.893301	1.08277	1.11131	1.27041	0.923118	1.0274	0.974655	1.01173	0.906336	1.01431	1.19792	1.12083	1.24243	1.13659	1.06005	1.17314	1.23009	1.22912	0.969867	1.25246	1.04905	1.62148	1.55769	2.13407	2.03794	2.16977	2.20876
O00764	PDXK	198	1	1.2526	1.06334	1.05526	1.01596	0.863598	1.10313	1.00756	0.946848	1.21946	1.1861	1.00004	0.928349	1.14456	1.46722	1.06783	1.1545	1.00252	1.103	0.874103	0.674435	0.743926	0.741473	0.725236	0.804108	0.874	0.878653	0.904395	0.726603	0.797742	0.818996	0.748503	0.907547	0.709434	0.718285
O00767	SCD	15	0.9976	0.614752	0.951217	0.803552	1.04082	0.944822	0.951292	1.32132	1.2313	0.993347	1.43915	1.28122	0.708615	1.04605	1.543	1.04634	1.08555	0.786524	1.29863	1.18003	0.705975	0.646536	0.766922	1.05211	0.971236	0.4882	0.903494	0.740799	0.907071	0.939505	0.936167	0.924013	1.15142	0.893055	0.895874
O14490	DLGAP1	10	0.9999	1.38001	1.02567	0.733312	0.983089	1.16963	0.929389	1.06476	1.0403	0.790455	0.814006	0.831307	0.941558	0.989931	1.13308	0.975127	0.910406	1.18875	0.795761	1.09995	0.949242	1.00459	0.912503	0.86672	0.871304	0.868479	1.06213	1.09442	0.916781	1.42605	1.089	1.22658	1.05954	1.00087	1.2174
O14492	SH2B2	1	0.9935	NA	1.97207	NA	NA	NA	1.28518	NA	NA	NA	NA	NA	NA	1.35296	NA	NA	NA	NA	NA	1.42143	1.22841	NA	NA	NA	1.17958	NA	NA	1.13134	NA	NA	NA	1.43918	NA	NA	NA
O14494	PLPP1	12	1	1.01824	0.868125	1.10363	1.17326	0.922858	0.916547	1.24873	1.30306	1.15555	0.920634	1.02016	1.15696	0.688802	0.897271	0.898656	0.867183	0.9129	0.853772	1.12814	0.969194	0.951559	0.972031	0.923277	1.01727	1.18976	0.923063	0.950151	1.01832	0.899542	0.793756	0.965793	1.1142	1.22588	1.15541
O14495	PLPP3	36	1	0.999831	0.785608	0.963945	1.07967	1.13634	0.995154	1.18686	1.22542	0.876377	0.96455	0.989964	0.920979	0.884825	0.88188	1.02018	0.8794	0.799836	0.859479	0.990596	1.33241	1.15343	1.09692	1.05969	1.30723	1.27043	0.994819	0.941287	1.29505	1.24838	1.34523	2.02164	1.96301	1.59845	1.50356
O14497	ARID1A	27	1	1.1065	1.03509	0.933865	1.025	1.21285	1.25733	0.947537	0.804324	0.900799	0.940194	1.09706	1.02684	0.935346	0.798715	1.038	0.947625	0.933927	1.23778	1.18145	1.05776	0.96358	1.12224	1.17947	1.00981	1.09662	1.10014	1.1628	1.09488	1.2313	1.29572	1.15961	1.20539	1.22802	1.12832
O14498	ISLR	39	1	0.753781	0.871214	0.992858	0.780298	1.04851	1.12485	1.0463	0.882355	1.06211	0.963209	1.10483	0.99438	0.800859	0.906495	0.920378	0.910862	0.833419	1.11282	1.28821	1.07256	1.16473	0.955129	1.00538	1.28467	1.09242	0.864678	1.24448	1.14431	0.993792	0.952879	1.02111	0.991686	0.958129	1.01637
O14514	ADGRB1	55	1	0.958886	1.04821	1.02497	0.898429	0.966247	0.924067	0.965608	0.948791	1.02551	1.01088	1.04064	1.08944	1.11213	1.1997	1.15454	0.952877	0.933803	0.960649	1.03635	0.901595	0.981894	1.0127	1.06605	1.14914	0.881439	0.822972	1.07423	1.02228	1.09409	0.892607	1.14231	1.0305	1.07562	1.05589
O14521	SDHD	30	0.9992	1.05316	0.875803	0.919634	1.12262	0.866982	1.14243	1.28403	1.7659	1.36752	1.01625	0.884984	1.30585	0.899135	0.973414	0.927061	0.908002	0.910975	1.03002	0.852414	1.25732	0.922942	0.816656	0.903039	1.11983	0.803859	0.803085	0.721131	0.812413	0.785793	0.821464	0.763718	0.490312	0.617718	0.672332
O14522	PTPRT	56	1	0.849439	0.949163	0.997252	1.02489	1.04564	1.01684	1.1318	0.981021	1.01762	1.03021	1.14014	1.01865	0.974681	1.04596	1.11909	1.0584	0.913446	1.05963	1.16539	1.21231	1.16819	1.06417	1.12446	1.10704	1.07234	1.06834	1.10733	1.16437	1.26501	1.19253	1.06465	1.46768	1.4781	1.16007
O14523	C2CD2L	138	1	0.998142	1.03277	0.936705	0.974888	0.981104	1.093	0.918694	0.937958	1.07304	1.03021	1.00395	1.01871	1.10466	1.02463	1.05653	0.968863	1.00234	1.05524	1.18219	1.1452	1.04173	1.04348	1.1746	1.0089	0.933593	0.976947	1.01112	0.964402	1.17719	1.19567	1.24275	1.4892	1.24445	1.19582
O14525	ASTN1	131	1	1.38348	1.17832	1.14974	0.995324	1.06032	1.03559	0.971903	0.910892	0.899337	0.915564	0.973241	0.89138	1.05296	0.994254	1.09766	1.00475	0.960339	0.845566	0.985	0.910366	0.897125	0.826906	0.917935	0.848163	0.891322	0.896199	0.941192	0.883559	0.872662	0.961641	1.02355	0.919926	0.846375	0.916375
O14526	FCHO1	16	1	0.932878	0.754743	1.03009	1.07378	1.29085	0.99089	1.0119	0.891254	0.935674	0.951466	1.05906	0.948086	0.827111	0.944094	0.963734	0.95729	0.898585	1.22353	1.15654	1.04627	1.17699	1.16203	1.12705	0.904841	1.1765	0.943742	1.00369	1.09813	1.28717	1.37421	1.39774	1.07781	1.37543	1.23721
O14530	TXNDC9	76	1	1.32016	1.14261	1.09582	1.21043	0.946211	1.02967	0.92298	1.03678	1.1043	1.04695	0.894079	1.00725	1.22078	1.10768	1.0153	1.13318	0.975472	0.972146	0.811198	0.736331	0.830953	0.958396	0.920909	0.938465	0.818891	0.85739	0.869625	0.70811	0.967716	0.79648	0.773078	0.844393	0.915998	0.818659
O14531	DPYSL4	388	1	1.5352	1.2672	1.1794	1.04451	1.20077	1.01092	0.895688	0.915796	0.888447	0.897363	1.07993	1.02977	1.06002	1.23109	1.12577	1.06371	0.844885	0.724273	0.92143	0.717933	0.805715	0.764535	0.755216	0.753674	0.717574	0.792215	0.847426	0.72657	0.788979	0.859727	0.753492	0.877634	0.869692	0.829978
O14548	COX7A2L	75	1	1.29856	1.0527	0.974859	1.00357	1.04735	1.09591	0.919601	1.18947	1.30003	0.9664	1.03074	1.08835	1.01101	1.05006	1.08013	1.08943	1.1197	1.1843	0.849351	0.83189	0.675894	0.707517	0.718024	0.99032	0.806598	0.775793	1.00633	0.664233	0.664199	0.788223	0.660754	0.589703	0.667762	0.62739
O14556	GAPDHS	25	1	0.649323	0.492778	0.913382	1.07661	1.30757	1.14108	1.44148	1.11009	1.07432	0.95589	0.867608	0.836143	0.890138	0.620488	0.945248	0.761461	0.652825	1.01886	0.563906	1.6374	1.67688	1.87373	1.7251	1.40333	2.13529	1.1326	0.687662	1.54892	1.34246	1.72699	1.24282	1.23721	1.3333	0.987026
O14558	HSPB6	65	1	0.794281	0.919977	0.964442	0.79457	0.902755	1.02065	1.16399	1.30306	0.972194	1.21497	0.974523	1.06814	0.841342	0.803495	0.925073	0.768677	0.879189	0.907464	1.11091	1.31538	1.15497	0.973035	1.01174	1.10572	1.79563	1.06554	1.04987	1.37829	1.07615	0.8779	1.05179	0.906921	0.827727	0.907094
O14559	ARHGAP33	5	0.9988	0.967279	1.0149	NA	0.822046	1.0684	1.2429	1.01174	1.08185	NA	NA	NA	0.95047	1.17077	1.21395	1.12063	1.10446	1.23916	NA	1.91682	1.27581	1.09349	NA	NA	1.35119	0.932603	1.52292	1.49625	1.9729	NA	1.78971	1.91363	NA	1.25727	1.59401
O14561	NDUFAB1	16	1	1.27097	1.56419	1.19943	1.09043	0.927401	0.920596	1.10448	1.36327	1.14349	0.773709	0.901514	1.53201	1.25639	1.33067	1.16523	0.915165	0.955427	0.70272	0.485929	0.518619	0.503818	0.694338	0.581488	0.781342	0.470543	0.742219	0.647787	0.485333	0.307199	0.304974	0.259102	0.549075	0.516216	0.517153
O14562	UBFD1	52	1	1.2588	1.04415	1.01615	1.00223	0.935392	0.895643	1.05264	0.980921	0.992944	0.84278	0.886171	1.04652	1.15443	1.10235	0.960926	1.13128	1.10964	0.983269	0.912301	0.781139	0.992837	0.773457	0.782443	1.0374	1.03725	1.07489	0.94024	1.03636	0.727333	0.936505	0.764357	0.589468	0.754404	0.686745
O14576	DYNC1I1	246	1	1.3324	1.22956	1.06101	0.941477	0.93817	0.979644	1.00072	1.12304	1.05951	0.98758	0.975869	1.14154	1.08838	0.984948	1.16104	1.04304	0.93145	0.903646	1.01988	0.722283	0.758225	0.713081	0.733918	0.814594	0.582162	0.906628	0.961071	0.800595	0.783377	0.754735	0.828046	0.701062	0.72514	0.733472
O14578	CIT	119	1	1.11081	1.04922	0.949146	0.976175	0.991661	1.14081	0.973487	1.04461	1.14496	0.955911	0.920241	1.01932	0.887735	0.934548	1.06249	0.885154	1.02007	1.03432	1.10853	1.17869	1.03781	0.895694	0.931385	0.993439	0.945987	0.884416	1.13658	0.90777	0.963841	1.28194	1.31599	1.4178	1.36932	1.25411
O14579	COPE	85	1	1.02713	1.05337	0.901902	0.949946	1.01068	0.924239	1.047	1.12065	0.958223	1.0525	0.904325	1.03434	0.997113	1.01673	1.13286	1.03726	1.04239	0.923486	0.935048	0.919248	0.87201	0.790222	0.907205	0.900192	0.890156	0.993736	0.905909	0.880324	0.922595	0.854676	0.766565	0.766849	0.970839	0.722853
O14593	RFXANK	1	0.9999	NA	NA	NA	NA	NA	NA	1.08218	1.04136	NA	NA	NA	NA	NA	0.93442	1.05638	NA	0.830406	NA	NA	NA	NA	NA	NA	NA	NA	0.99777	NA	1.07637	NA	0.673619	NA	NA	NA	NA
O14594	NCAN	399	1	0.909446	1.0167	0.924459	0.958795	0.928999	0.971515	1.0378	0.768002	1.34916	1.14972	0.965051	1.10237	1.45267	1.13633	1.00145	0.891423	1.1099	1.00566	0.99027	0.901256	0.866147	0.960156	0.997132	0.911918	0.746728	0.935525	0.964796	0.902869	0.947172	0.902884	0.695523	0.948977	0.883873	1.02251
O14595	CTDSP2	3	0.9963	NA	0.87106	0.769616	NA	NA	0.829129	NA	NA	0.906955	1.0006	0.908898	NA	0.914605	NA	NA	NA	NA	1.00726	0.954073	0.960631	NA	1.11823	1.22952	1.14717	NA	NA	0.894475	NA	1.06073	NA	1.11542	1.26414	NA	NA
O14604	TMSB4Y	11	0.9947	0.907945	0.440356	0.824569	0.868348	0.784194	0.662615	1.4934	0.917144	1.05229	1.14272	1.36744	1.04114	1.20948	1.57413	1.38933	0.79194	0.810051	1.20462	2.18076	0.710319	0.95144	1.17294	1.38166	1.38032	0.438351	1.00203	1.9122	1.45573	1.5385	1.43882	0.982237	1.58376	0.905063	0.942951
O14613	CDC42EP2	52	1	0.913447	1.10201	1.07964	1.02822	1.00129	0.968086	1.15426	0.961365	0.869955	1.13246	0.94248	0.894397	0.922192	1.06519	1.09392	0.903379	0.846669	1.0906	0.959581	0.921931	1.07849	1.02505	0.823498	0.920026	1.02027	1.00663	0.959062	1.04079	1.04298	0.942333	1.02901	0.811501	0.71682	0.817548
O14618	CCS	60	1	1.22525	1.19442	1.05279	0.922152	0.990826	0.783759	1.02285	1.02304	1.11211	1.15188	0.963136	1.03484	1.18925	1.07835	0.888474	1.07987	1.15867	0.813862	0.862193	0.688627	0.889101	0.958463	0.734105	1.02807	1.02295	1.08197	0.930444	1.02009	0.971417	0.648017	0.575008	0.645295	0.520663	0.619057
O14641	DVL2	10	1	0.83304	1.00367	0.891782	0.962388	0.917384	1.00494	0.989222	1.20893	0.989235	1.12436	1.06225	1.05228	0.844613	0.908516	0.98636	1.07405	0.928725	1.21187	0.953724	1.30101	1.04157	1.15297	1.31025	1.13893	1.10744	0.921829	1.05256	0.939674	1.16974	0.855173	1.079	1.28477	0.978256	0.919524
O14646	CHD1	1	0.9926	0.611608	NA	NA	0.87129	1.56757	NA	NA	NA	NA	NA	NA	1.3757	NA	NA	NA	1.0165	NA	NA	NA	NA	1.5396	NA	NA	NA	1.37787	NA	NA	NA	NA	NA	NA	NA	1.33708	1.90801
O14647	CHD2	6	0.9999	0.990768	0.915913	0.92268	1.03904	1.20556	1.31081	1.35533	0.933471	1.01656	0.869167	0.994734	1.02434	0.694737	0.938225	1.0607	0.82871	1.19792	1.19166	0.95454	1.24753	1.10507	0.903682	1.26985	1.13236	1.05485	1.07371	1.13085	0.869151	1.77462	1.91815	1.99367	1.86067	1.88635	1.57963
O14656	TOR1A	40	1	0.987939	1.17411	1.04637	0.965973	1.01433	1.02839	1.1193	1.2271	0.97194	0.871437	1.01441	1.04257	1.01039	1.13422	1.03655	1.08134	1.13954	0.916811	1.02514	1.0455	0.958086	0.97969	1.03148	0.946004	0.952222	0.991983	0.9725	1.0107	1.0616	1.20724	0.953599	1.05003	1.11662	1.06265
O14657	TOR1B	15	1	0.9385	0.825243	1.02277	1.11327	1.04413	0.997676	1.02845	1.0543	0.945414	0.986566	0.996176	0.921478	0.790744	1.03683	1.04894	0.953891	1.0099	1.04982	1.09209	1.07325	1.06856	0.902823	1.01236	0.905385	1.01941	0.99117	0.808117	0.998037	1.23872	1.03098	1.55992	1.23178	1.14863	1.13338
O14662	STX16	80	1	1.12901	0.99988	1.02729	0.965872	1.05958	0.96143	1.04111	1.02407	1.08417	1.06866	0.98741	1.03683	1.00617	1.06802	0.998466	1.08536	1.07091	1.1129	1.02662	0.860508	1.04204	1.05282	0.896979	1.01985	1.05335	1.07198	0.973607	0.977035	1.12866	0.992725	1.15308	0.998978	0.963537	1.12316
O14672	ADAM10	152	1	0.833478	0.909	1.0441	1.00369	1.26615	0.980423	1.1396	0.849957	0.90339	0.997956	1.04165	0.849479	0.961062	1.11924	1.01201	1.13955	0.887666	1.205	1.20608	0.989448	1.00665	0.99712	1.10603	0.9946	0.908635	1.04624	0.913657	0.948128	1.07576	1.12863	0.955732	1.16102	1.07416	1.17227
O14678	ABCD4	5	1	0.548931	0.632847	NA	1.24352	1.45437	0.950178	1.31133	1.65793	NA	NA	NA	1.36705	0.773928	1.86117	1.89459	1.62841	1.20301	NA	0.590997	0.454905	1.73006	NA	NA	0.91013	1.66804	0.995173	0.670991	1.063	NA	1.5747	0.58865	NA	2.52775	1.51527
O14682	ENC1	7	1	1.28439	0.752577	0.599979	0.802994	1.25239	0.517047	1.15455	1.03259	0.635226	0.743707	0.70798	0.798118	0.725504	1.326	1.17796	0.791584	1.53975	1.06834	1.19012	0.795283	1.17218	0.695695	0.557567	0.766808	1.56647	1.5278	1.13098	0.743369	1.03449	1.24634	1.08656	1.05016	1.55281	1.67568
O14683	TP53I11	23	1	1.02008	0.949622	0.856283	0.908978	0.727034	0.877514	0.949538	0.90782	1.06964	1.23156	0.974638	1.25549	1.20464	1.10116	0.909315	1.0585	0.891982	0.817257	1.09784	1.28826	1.34457	1.6185	1.13261	1.30367	1.15339	1.04617	0.979971	1.55689	1.42018	1.13649	1.10012	1.82274	1.42922	1.52564
O14684	PTGES	8	1	0.661903	0.827933	1.28872	1.05404	0.836144	1.02433	1.31032	1.32823	1.21722	1.25365	1.03566	1.15588	1.44373	0.982168	0.941266	0.698502	1.00354	1.09946	1.14918	1.97097	1.6467	1.31537	1.54388	1.28453	1.1058	0.833354	0.980043	1.83122	1.29829	1.83737	1.65208	1.48237	1.35491	1.39375
O14713	ITGB1BP1	35	1	1.08494	0.936072	0.947463	1.14309	0.935014	1.03243	0.98079	1.16243	1.07447	1.08161	1.01941	0.968056	0.992385	1.13712	1.16666	1.0586	1.0281	0.846452	0.978275	0.970098	1.07424	0.95026	0.994982	1.09694	1.00688	1.07413	0.949493	1.00727	0.98416	0.973042	1.18608	0.940411	1.40644	1.29795
O14732	IMPA2	12	0.9995	0.720676	0.915371	1.26138	1.05105	0.828585	1.09656	1.11417	0.838153	0.9374	0.921138	1.0392	0.937901	0.909336	0.837436	0.887109	0.680953	0.97088	1.07041	1.04347	1.68179	1.36091	1.17115	1.34778	1.15621	1.53587	1.05722	0.972652	1.16983	1.32807	1.47747	1.52325	1.43343	1.95807	1.36369
O14733	MAP2K7	17	1	0.982413	1.09124	1.19252	0.979177	1.03514	1.01478	1.00461	1.10923	1.09879	1.29786	1.05	0.881997	1.01165	0.87361	1.02007	1.04687	0.874213	1.17114	0.902433	1.0338	0.89725	0.954647	1.017	1.03374	1.05355	0.873702	0.9227	0.870449	0.989816	1.02948	1.08671	0.996935	0.980746	0.973128
O14734	ACOT8	76	1	1.13822	1.03372	1.0339	1.11886	0.850511	0.946062	0.825236	0.966657	1.21807	0.980302	1.07032	1.11365	1.11593	1.33658	1.05658	1.07371	0.927521	0.981485	0.826685	0.7532	0.826159	0.974569	0.809808	0.867513	0.958822	0.82502	0.896773	0.925939	0.849701	0.829867	0.925852	0.96218	0.932008	0.934455
O14735	CDIPT	58	1	0.685939	0.759388	0.741731	0.881308	0.870603	0.941493	1.14966	1.3366	1.2802	1.34284	1.08498	1.07037	0.778651	1.06554	0.997238	0.735325	0.886819	0.867963	1.09064	1.66103	1.39018	1.19823	1.39617	1.40831	1.09475	0.84377	1.02078	1.45104	0.933783	0.828356	0.79605	0.990854	0.88574	0.732156
O14737	PDCD5	132	1	0.992122	1.49764	1.33042	0.723135	0.792467	0.869743	1.05812	1.24743	1.00795	1.42697	1.07883	1.349	1.18198	0.962994	1.08222	0.844123	0.978553	0.894377	0.948835	0.683543	0.775058	0.935385	0.582807	1.07621	0.7441	0.980607	0.952247	1.03311	0.677052	0.581343	0.588266	0.635663	0.530282	0.610036
O14744	PRMT5	163	1	1.46382	1.13878	1.14617	1.16787	1.10359	1.03639	0.936203	0.931442	0.848848	0.868908	0.996589	0.928015	1.17195	1.10942	1.10755	1.14668	1.02211	0.784455	0.817112	0.752221	0.910794	0.820564	0.787134	0.828505	0.901219	0.916941	0.888849	0.791295	0.704789	0.762723	0.754202	0.648451	0.764625	0.816037
O14745	NHERF1	310	1	1.08084	1.08773	1.09568	0.948352	0.954361	0.968159	0.932283	0.993431	0.859938	1.05362	1.05187	1.12817	0.98546	1.01908	1.01311	1.04257	1.11209	0.799513	0.923002	0.897312	1.04489	1.10974	0.937553	1.07392	1.0529	1.29413	1.06161	1.26952	0.807763	0.731786	0.663122	0.587068	0.575527	0.71364
O14763	TNFRSF10B	2	0.9957	1.30788	0.654198	NA	1.12301	0.889401	NA	NA	NA	NA	NA	NA	1.33163	1.005	NA	NA	1.57517	NA	NA	1.29067	1.0366	1.39783	NA	NA	0.907214	1.37649	NA	1.57436	NA	NA	NA	1.16032	NA	NA	1.39957
O14764	GABRD	12	1	0.817062	0.949334	0.788069	0.829986	0.868936	0.944065	0.912091	1.03212	1.24741	1.06677	0.988	1.04404	1.10825	0.924018	1.14296	0.762718	0.996883	1.09419	1.18197	1.37703	1.07315	0.93661	1.31799	1.36731	0.952633	1.11064	0.987364	1.22483	1.22809	1.60637	1.30923	1.72472	2.10298	1.8069
O14772	FPGT	25	1	0.986819	0.889236	1.0321	1.08424	0.927634	0.952313	0.864987	0.940341	0.922971	1.0364	0.850482	0.894167	0.779241	0.853064	0.99785	0.863163	1.05286	1.16403	0.94633	1.02856	1.08127	1.06845	1.20852	0.933355	1.21892	0.923517	0.944359	1.00239	1.20779	1.00846	0.964355	0.8874	0.966045	1.01798
O14773	TPP1	158	1	0.61229	0.818985	0.782576	0.949153	1.141	1.0011	1.1388	0.867974	1.45356	1.22922	0.912548	1.11159	0.994666	0.940736	0.851663	0.980637	1.22143	1.31865	1.14876	1.34842	1.37111	1.7981	1.63044	1.28652	1.19909	1.51568	1.15146	2.31665	1.02781	1.06467	0.830842	0.970069	0.991074	1.08936
O14775	GNB5	141	1	1.40415	1.15172	1.25729	1.03018	1.01766	0.87254	1.00919	0.962339	1.1503	1.02267	0.929417	0.9999	1.07947	1.08262	0.993632	1.10138	0.898564	0.873267	0.830126	0.903749	0.805594	0.769803	0.758607	0.88476	0.809619	0.700194	0.831286	0.731501	0.817244	0.884311	0.856917	0.882979	0.905145	0.9421
O14776	TCERG1	79	1	1.0247	0.924767	1.00794	0.973064	1.10137	0.990468	1.16714	0.933942	0.918451	1.00152	0.888138	0.909005	0.887045	0.942624	1.04073	1.16399	1.03987	1.27479	0.964889	1.01298	1.14318	1.08608	1.1285	1.04177	1.11624	1.23812	1.03566	1.12981	1.11528	1.04509	1.08578	1.15048	1.12879	1.1248
O14782	KIF3C	44	1	0.933859	0.95473	0.859652	1.14483	1.0729	1.00373	0.866362	0.842066	1.03667	1.2222	1.17993	1.04838	1.02505	0.931785	0.996944	0.917388	1.14777	1.10289	1.3304	1.05357	1.09582	1.05354	1.1815	1.05747	1.13197	1.17456	1.12014	1.02957	1.36435	1.28936	1.25394	1.4458	1.40717	1.37809
O14786	NRP1	64	1	1.53392	1.00015	1.0136	1.05151	0.968099	0.98308	0.895771	0.839253	0.773885	0.836279	0.912533	0.867471	1.13298	1.02871	0.887338	0.955144	1.08646	0.927265	1.07302	1.00285	0.989441	0.89773	1.06504	0.917998	0.860016	1.01872	0.921208	0.935553	1.00164	1.0166	1.15325	1.004	0.887608	0.962984
O14787	TNPO2	34	1	2.73286	1.074	1.00304	1.03233	0.908129	0.875761	0.890002	0.898184	0.733684	0.835856	0.921232	1.03225	0.975038	1.38316	1.15482	1.42067	0.655995	0.886542	0.970455	1.0216	0.858253	0.643446	0.579052	0.826816	0.689506	0.853024	0.870655	0.857204	0.919637	0.96246	1.04994	0.913196	1.08917	0.914042
O14807	MRAS	166	1	0.851345	1.0416	1.00637	0.916706	0.996206	1.1941	1.10795	1.0131	1.08913	1.05807	1.0593	1.13486	1.02453	0.936991	0.92226	0.887691	0.910068	1.05877	0.981433	1.11593	1.01636	1.01758	0.953131	1.19059	1.20712	0.92545	1.00502	0.931807	1.04166	0.900783	0.967958	0.866155	0.92769	0.965297
O14810	CPLX1	139	1	1.06768	1.52296	1.42986	0.846375	0.925495	0.938634	1.36956	1.3125	0.809537	1.06739	0.84776	1.33602	1.06858	0.942942	1.20312	0.91091	0.785579	1.07706	0.732659	1.08338	0.866325	0.948726	0.816417	1.11997	0.703026	0.915654	0.816466	0.981949	0.623056	0.605567	0.671264	0.606386	0.507548	0.531799
O14818	PSMA7	206	1	0.963539	0.984815	0.990683	1.05078	1.05075	1.0607	1.17865	0.988142	1.22161	0.944809	1.00304	1.14151	1.24572	1.03825	1.04438	0.998992	1.0317	0.763814	0.922139	1.02702	0.977543	0.844275	0.805372	1.09319	1.15052	0.96574	0.942746	0.816434	0.626308	0.717225	0.606104	0.464722	0.721518	0.696923
O14827	RASGRF2	65	1	1.25783	1.01178	0.985768	0.991416	1.03266	0.98446	0.957685	0.905307	0.934608	0.972239	1.00177	1.02437	0.947253	1.01741	0.980003	0.983794	1.01723	1.07841	1.08981	1.16233	1.09426	1.08701	0.986815	1.03963	0.924685	1.09963	1.04667	0.985983	1.15175	1.05037	1.43711	1.22921	1.14706	1.19361
[truncated: 7,753 more rows]
